# Supplementary material for: Identification of the Mechanism of Action of the Index Components of Banxia Xiexin Decoction for Gastric Cancer through Network Pharmacology, Bioinformatics, and Molecular Docking Analysis
Source: Hindawi journal article supplement (doi:10.1155/2024/4309908), 2024-01-13
Supplement: f1 [file 4309908.f1.zip]

Archive with 6 entries (6 files):
- Supplementary file S1 ADMET profile.docx
- Supplementary file S2 Enriched GO BP terms.txt
- Supplementary file S3 Enriched GO CC terms.txt
- Supplementary file S4  Enriched GO MF terms.txt
- Supplementary file S5  Enriched KEGG pathwanys.txt
- Supplementary file S6 molecular docking settings.docx
