# Supplementary material for: Identification of the Mechanism of Action of the Index Components of Banxia Xiexin Decoction for Gastric Cancer through Network Pharmacology, Bioinformatics, and Molecular Docking Analysis
Source: Hindawi journal article supplement (doi:10.1155/2024/4309908), 2024-01-13
Supplement: f1 [file 4309908.f1.zip › Supplementary file S1 ADMET profile.docx]

**Comprehensive ADMET Profiles of Investigated Compounds for Gastric Cancer Treatment**

|  |  | baicalin | Berberine | coptisine | epiberberine | palmatine | glycyrrhizic acid | 6-gingerol |  |
| --- | --- | --- | --- | --- | --- | --- | --- | --- | --- |
| Absorption | Water solubility | -2.764 | -3.973 | -4.014 | -3.615 | -4.194 | -2.892 | -3.164 | Numeric (log mol/L) |
| Absorption | Caco2 permeability | -0.67 | 1.734 | 2.016 | 1.87 | 0.863 | -0.812 | 0.94 | Numeric (log Papp in 10-6 cm/s) |
| Absorption | Intestinal absorption (human) | 26.224 | 97.147 | 98.07 | 97.961 | 97.084 | 0 | 92.416 | Numeric (% Absorbed) |
| Absorption | Skin Permeability | -2.735 | -2.576 | -2.594 | -2.553 | -2.554 | -2.735 | -2.817 | Numeric (log Kp) |
| Absorption | P-glycoprotein substrate | Yes | Yes | Yes | Yes | Yes | Yes | Yes | Categorical (Yes/No) |
| Absorption | P-glycoprotein I inhibitor | No | No | No | No | Yes | No | No | Categorical (Yes/No) |
| Absorption | P-glycoprotein II inhibitor | No | Yes | Yes | Yes | Yes | No | No | Categorical (Yes/No) |
| Distribution | VDss (human) | 0.267 | 0.58 | 0.625 | 0.887 | 0.641 | -0.615 | 0.524 | Numeric (log L/kg) |
| Distribution | Fraction unbound (human) | 0.294 | 0.262 | 0.254 | 0.292 | 0.245 | 0.421 | 0.258 | Numeric (Fu) |
| Distribution | BBB permeability | -1.331 | 0.198 | -0.062 | 0.341 | -0.112 | -1.494 | -0.727 | Numeric (log BB) |
| Distribution | CNS permeability | -3.811 | -1.543 | -1.534 | -1.557 | -1.535 | -4.206 | -2.788 | Numeric (log PS) |
| Metabolism | CYP2D6 substrate | No | No | No | No | No | No | No | Categorical (Yes/No) |
| Metabolism | CYP3A4 substrate | No | Yes | Yes | Yes | Yes | Yes | No | Categorical (Yes/No) |
| Metabolism | CYP1A2 inhibitior | No | Yes | Yes | Yes | Yes | No | Yes | Categorical (Yes/No) |
| Metabolism | CYP2C19 inhibitior | No | No | No | No | No | No | Yes | Categorical (Yes/No) |
| Metabolism | CYP2C9 inhibitior | No | No | No | No | No | No | Yes | Categorical (Yes/No) |
| Metabolism | CYP2D6 inhibitior | No | Yes | No | Yes | Yes | No | No | Categorical (Yes/No) |
| Metabolism | CYP3A4 inhibitior | No | Yes | Yes | No | No | No | No | Categorical (Yes/No) |
| Excretion | Total Clearance | 0.04 | 1.27 | 1.28 | 1.278 | 1.246 | -0.304 | 1.339 | Numeric (log ml/min/kg) |
| Excretion | Renal OCT2 substrate | No | No | Yes | Yes | No | No | No | Categorical (Yes/No) |
| Toxicity | AMES toxicity | No | Yes | Yes | No | Yes | No | No | Categorical (Yes/No) |
| Toxicity | Max. tolerated dose (human) | 0.652 | 0.144 | -0.364 | -0.206 | 0.231 | 0.389 | 0.635 | Numeric (log mg/kg/day) |
| Toxicity | hERG I inhibitor | No | No | No | No | No | No | No | Categorical (Yes/No) |
| Toxicity | hERG II inhibitor | No | No | No | No | Yes | No | No | Categorical (Yes/No) |
| Toxicity | Oral Rat Acute Toxicity (LD50) | 2.634 | 2.571 | 2.229 | 2.652 | 2.551 | 2.48 | 1.958 | Numeric (mol/kg) |
| Toxicity | Oral Rat Chronic Toxicity (LOAEL) | 4.536 | 1.89 | 1.292 | 1.718 | 1.536 | 5.889 | 1.631 | Numeric (log mg/kg_bw/day) |
| Toxicity | Hepatotoxicity | No | Yes | Yes | Yes | Yes | No | No | Categorical (Yes/No) |
| Toxicity | Skin Sensitisation | No | No | No | No | No | No | No | Categorical (Yes/No) |
| Toxicity | T.Pyriformis toxicity | 0.285 | 0.354 | 0.4 | 0.354 | 0.388 | 0.285 | 1.487 | Numeric (log ug/L) |
| Toxicity | Minnow toxicity | 5.525 | -0.277 | 0.207 | -0.158 | -0.313 | 5.591 | 0.966 | Numeric (log mM) |
