# Supplementary material for: Identification of the Mechanism of Action of the Index Components of Banxia Xiexin Decoction for Gastric Cancer through Network Pharmacology, Bioinformatics, and Molecular Docking Analysis
Source: Hindawi journal article supplement (doi:10.1155/2024/4309908), 2024-01-13
Supplement: f1 [file 4309908.f1.zip › Supplementary file S2 Enriched GO BP terms.txt]

ONTOLOGY	ID	Description	GeneRatio	BgRatio	pvalue	p.adjust	qvalue	geneID	Count
BP	GO:0048732	gland development	36/153	434/18670	4.15419E-26	1.71485E-22	7.91482E-23	ABL1/AKT1/AKT2/AR/BMP2/BMP7/CYP19A1/EGFR/EPHA2/ERBB4/ESR1/FGFR1/FGFR2/HGF/HMOX1/HPN/INSR/JAK2/MET/PGR/MAPK1/MAP2K1/RAF1/RARA/RARB/RARG/REG1A/SRC/AURKA/TGFB2/TGFBR1/TGFBR2/TGM2/TYMS/UMPS/VDR	36
BP	GO:0000302	response to reactive oxygen species	27/153	232/18670	1.50455E-23	3.10539E-20	1.43328E-20	ABL1/AKT1/BMP7/BTK/CASP3/CAT/CDK2/DHFR/NQO1/EGFR/GSTP1/HGF/HMOX1/LCN2/MDM2/MET/MMP2/MMP3/MMP9/NOS3/MAPK1/MAPK8/SOD2/SRC/STAT1/AKR1C3/PRDX5	27
BP	GO:0043491	protein kinase B signaling	28/153	269/18670	4.76091E-23	6.55101E-20	3.02359E-20	AKT1/EGFR/EPHA2/ERBB4/ESR1/FGF1/FGFR1/FGFR2/GRB2/HGF/HSP90AA1/HSP90AB1/IGF1/IGF1R/INSR/KDR/KIT/MET/PIK3CG/PIK3R1/PTK2/PTPN11/RAC1/CCL5/SRC/TEK/TGFBR1/AKR1C3	28
BP	GO:0034599	cellular response to oxidative stress	29/153	302/18670	7.44408E-23	6.57229E-20	3.03341E-20	ABL1/PARP1/AKT1/BMP7/BTK/CAT/CDK2/DAPK1/DHFR/NQO1/EGFR/GSTP1/HGF/HMOX1/HSPA1A/JAK2/LCN2/MDM2/MET/MMP2/MMP3/MMP9/NOS3/MAPK1/MAPK8/SOD2/SRC/AKR1C3/PRDX5	29
BP	GO:0048608	reproductive structure development	33/153	431/18670	7.96062E-23	6.57229E-20	3.03341E-20	AKT1/AR/BCL2L1/BMP7/CASP3/MAPK14/CTNNA1/CTSB/CYP19A1/EGFR/ESR1/FGFR2/GRB2/HSP90AB1/INSR/KIT/MME/NOS3/PGR/PPARG/MAPK1/MAP2K1/PTK2/PTPN11/RARA/RARG/RBP4/SRC/ST14/TGFB2/TGFBR1/VDR/AKR1C3	33
BP	GO:0061458	reproductive system development	33/153	434/18670	9.90625E-23	6.8155E-20	3.14567E-20	AKT1/AR/BCL2L1/BMP7/CASP3/MAPK14/CTNNA1/CTSB/CYP19A1/EGFR/ESR1/FGFR2/GRB2/HSP90AB1/INSR/KIT/MME/NOS3/PGR/PPARG/MAPK1/MAP2K1/PTK2/PTPN11/RARA/RARG/RBP4/SRC/ST14/TGFB2/TGFBR1/VDR/AKR1C3	33
BP	GO:0018108	peptidyl-tyrosine phosphorylation	30/153	363/18670	9.96965E-22	5.87924E-19	2.71354E-19	ABL1/BTK/ACE/EGFR/EPHA2/EPHB4/ERBB4/FGFR1/FGFR2/HGF/IGF1/IGF1R/IL2/INSR/ITK/JAK2/JAK3/KDR/KIT/MET/MAP2K1/PTK2/PTPN1/PTPN11/CCL5/SRC/SYK/ADAM17/TEK/TNK2	30
BP	GO:0018212	peptidyl-tyrosine modification	30/153	366/18670	1.26459E-21	6.5253E-19	3.01173E-19	ABL1/BTK/ACE/EGFR/EPHA2/EPHB4/ERBB4/FGFR1/FGFR2/HGF/IGF1/IGF1R/IL2/INSR/ITK/JAK2/JAK3/KDR/KIT/MET/MAP2K1/PTK2/PTPN1/PTPN11/CCL5/SRC/SYK/ADAM17/TEK/TNK2	30
BP	GO:0051897	positive regulation of protein kinase B signaling	23/153	176/18670	2.48919E-21	1.14171E-18	5.26951E-19	EGFR/ERBB4/ESR1/FGF1/FGFR1/FGFR2/GRB2/HGF/HSP90AA1/HSP90AB1/IGF1R/INSR/KIT/MET/PIK3CG/PIK3R1/PTK2/PTPN11/RAC1/SRC/TEK/TGFBR1/AKR1C3	23
BP	GO:0048545	response to steroid hormone	30/153	385/18670	5.42676E-21	2.24017E-18	1.03394E-18	PARP1/AR/RHOA/BMP7/CA2/CASP3/CDK7/EGFR/EIF4E/ESR1/ESR2/NR3C1/GSTP1/JAK2/MDM2/PGR/PPARA/PPARG/RARA/RARB/RARG/RORA/RXRB/SRC/TGFB2/TGFBR2/TYMS/NR1H2/VDR/AKR1C3	30
BP	GO:0014068	positive regulation of phosphatidylinositol 3-kinase signaling	18/153	87/18670	1.18388E-20	4.44277E-18	2.05054E-18	CAT/ERBB4/F2/FGFR1/HGF/IGF1/IGF1R/INSR/JAK2/KDR/KIT/PIK3CG/PIK3R1/PTK2/CCL5/SRC/TEK/TGFB2	18
BP	GO:0050673	epithelial cell proliferation	31/153	434/18670	1.44589E-20	4.82972E-18	2.22914E-18	AKT1/AR/BMP2/CDK6/EGFR/EPHA2/ESR1/FAP/FGF1/FGFR1/FGFR2/HGF/HMOX1/HPN/HRAS/IGF1/KDR/KIT/MMP12/PGR/PPARG/MAPK1/MAP2K1/REG1A/CCL5/STAT1/ADAM17/TEK/TGFB2/TGFBR1/VDR	31
BP	GO:0014066	regulation of phosphatidylinositol 3-kinase signaling	20/153	124/18670	1.52099E-20	4.82972E-18	2.22914E-18	CAT/EGFR/ERBB4/F2/FGFR1/HGF/IGF1/IGF1R/INSR/JAK2/KDR/KIT/PIK3CG/PIK3R1/MAPK1/PTK2/CCL5/SRC/TEK/TGFB2	20
BP	GO:0051896	regulation of protein kinase B signaling	25/153	244/18670	1.7912E-20	5.09616E-18	2.35212E-18	AKT1/EGFR/EPHA2/ERBB4/ESR1/FGF1/FGFR1/FGFR2/GRB2/HGF/HSP90AA1/HSP90AB1/IGF1R/INSR/KIT/MET/PIK3CG/PIK3R1/PTK2/PTPN11/RAC1/SRC/TEK/TGFBR1/AKR1C3	25
BP	GO:0034614	cellular response to reactive oxygen species	22/153	168/18670	1.8518E-20	5.09616E-18	2.35212E-18	ABL1/AKT1/BMP7/BTK/CDK2/DHFR/NQO1/EGFR/HGF/LCN2/MDM2/MET/MMP2/MMP3/MMP9/NOS3/MAPK1/MAPK8/SOD2/SRC/AKR1C3/PRDX5	22
BP	GO:0014065	phosphatidylinositol 3-kinase signaling	21/153	148/18670	2.57191E-20	6.63554E-18	3.06261E-18	AKT1/CAT/EGFR/ERBB4/F2/FGFR1/HGF/IGF1/IGF1R/INSR/JAK2/KDR/KIT/PIK3CG/PIK3R1/MAPK1/PTK2/CCL5/SRC/TEK/TGFB2	21
BP	GO:0097191	extrinsic apoptotic signaling pathway	24/153	224/18670	3.81796E-20	9.2709E-18	4.27895E-18	AKT1/AR/BCL2L1/CASP3/CTNNA1/DAPK1/FGFR1/FGG/GSK3B/GSTP1/HGF/HMOX1/HSPA1A/IGF1/IL2/JAK2/LCN2/LGALS3/NOS3/PIK3R1/RAF1/SRC/TGFB2/TGFBR1	24
BP	GO:0006979	response to oxidative stress	31/153	451/18670	4.44592E-20	1.0196E-17	4.70592E-18	ABL1/PARP1/AKT1/BMP7/BTK/CASP3/CAT/CDK2/DAPK1/DHFR/NQO1/EGFR/GSTP1/HGF/HMOX1/HSPA1A/JAK2/LCN2/MDM2/MET/MMP2/MMP3/MMP9/NOS3/MAPK1/MAPK8/SOD2/SRC/STAT1/AKR1C3/PRDX5	31
BP	GO:0072593	reactive oxygen species metabolic process	26/153	284/18670	5.10394E-20	1.1089E-17	5.11808E-18	AKT1/RHOA/BMP7/CAT/MAPK14/DHFR/NQO1/EGFR/F2/GRB2/GSTP1/HSP90AA1/HSP90AB1/INSR/JAK2/MMP3/NQO2/NOS2/NOS3/RAC1/RORA/SOD2/SYK/TGFBR2/AKR1C3/PRDX5	26
BP	GO:0048015	phosphatidylinositol-mediated signaling	22/153	181/18670	9.73224E-20	2.00873E-17	9.27124E-18	AKT1/RHOA/CAT/EGFR/ERBB4/F2/FGFR1/HGF/IGF1/IGF1R/INSR/JAK2/KDR/KIT/PIK3CG/PIK3R1/MAPK1/PTK2/CCL5/SRC/TEK/TGFB2	22
BP	GO:0046777	protein autophosphorylation	24/153	235/18670	1.19209E-19	2.34331E-17	1.08155E-17	ABL1/AKT1/BTK/DAPK1/ACE/EGFR/EPHB4/ERBB4/FGFR1/FGFR2/GSK3B/IGF1R/INSR/ITK/JAK2/KDR/KIT/PRKACA/PTK2/SRC/AURKA/SYK/TEK/TNK2	24
BP	GO:0048017	inositol lipid-mediated signaling	22/153	184/18670	1.40041E-19	2.62767E-17	1.21279E-17	AKT1/RHOA/CAT/EGFR/ERBB4/F2/FGFR1/HGF/IGF1/IGF1R/INSR/JAK2/KDR/KIT/PIK3CG/PIK3R1/MAPK1/PTK2/CCL5/SRC/TEK/TGFB2	22
BP	GO:0033002	muscle cell proliferation	24/153	239/18670	1.77706E-19	3.18943E-17	1.47207E-17	AKT1/MAPK14/EGFR/ERBB4/FGFR1/FGFR2/GSTP1/HMOX1/IGF1/JAK2/MDM2/MMP2/MMP9/NQO2/PPARG/MAPK1/RBP4/CCL5/SOD2/STAT1/TGFB2/TGFBR1/TGFBR2/TGM2	24
BP	GO:0071383	cellular response to steroid hormone stimulus	24/153	250/18670	5.1308E-19	8.82498E-17	4.07314E-17	PARP1/AR/RHOA/BMP7/CDK7/EGFR/EIF4E/ESR1/ESR2/NR3C1/GSTP1/JAK2/PGR/PPARA/PPARG/RARA/RARB/RARG/RORA/RXRB/SRC/NR1H2/VDR/AKR1C3	24
BP	GO:0035265	organ growth	21/153	204/18670	2.26552E-17	3.74082E-15	1.72656E-15	AKT1/AR/MAPK14/CYP19A1/ERBB4/ESR1/FGFR1/FGFR2/IGF1/MMP13/PPARA/MAPK1/PTK2/PTPN11/RARA/RARB/RARG/RBP4/TGFB2/TGFBR1/TGFBR2	21
BP	GO:0022407	regulation of cell-cell adhesion	27/153	403/18670	2.86786E-17	4.55327E-15	2.10155E-15	ABL1/AKT1/RHOA/BMP2/BMP7/CASP3/CDC42/MAPK14/DPP4/FGG/GRB2/IGF1/IL2/JAK2/JAK3/LGALS3/PIK3R1/PLG/PPARA/PTK2/PTPN11/RAC1/RARA/CCL5/SRC/SYK/TGFBR2	27
BP	GO:2001233	regulation of apoptotic signaling pathway	27/153	406/18670	3.45772E-17	5.26919E-15	2.43198E-15	PARP1/AKT1/APAF1/AR/BCL2L1/CSNK2A1/CTNNA1/FGFR1/FGG/GSK3B/GSTP1/HGF/HMOX1/HSPA1A/IGF1/JAK2/LGALS3/MDM2/MMP9/NOS3/MAPK8/PTPN1/RAF1/S100A9/SOD2/SRC/TGFBR1	27
BP	GO:0071902	positive regulation of protein serine/threonine kinase activity	25/153	334/18670	3.57406E-17	5.26919E-15	2.43198E-15	AKT1/RHOA/BMP2/MAPK14/EGFR/FGF1/FGFR1/HGF/HRAS/HSP90AB1/IGF1/INSR/JAK2/KIT/PIK3CG/MAPK1/MAP2K1/PTPN1/PTPN11/RAF1/SRC/SYK/ADAM17/TGFBR1/BIRC7	25
BP	GO:0043401	steroid hormone mediated signaling pathway	20/153	184/18670	4.67522E-17	6.65493E-15	3.07156E-15	PARP1/AR/RHOA/BMP7/CDK7/ESR1/ESR2/NR3C1/JAK2/PGR/PPARA/PPARG/RARA/RARB/RARG/RORA/RXRB/SRC/NR1H2/VDR	20
BP	GO:0045785	positive regulation of cell adhesion	26/153	403/18670	2.94825E-16	4.05679E-14	1.87239E-14	ABL1/AKT1/RHOA/BMP7/CDC42/CDK6/DPP4/FGG/GRB2/GSK3B/IGF1/IL2/JAK2/JAK3/KDR/PIK3R1/PTPN11/RAC1/RARA/CCL5/SRC/SYK/TEK/TGFB2/TGFBR2/TGM2	26
BP	GO:0032147	activation of protein kinase activity	24/153	333/18670	3.81927E-16	5.08579E-14	2.34733E-14	ABL1/AKT1/BMP2/MAPK14/EGFR/FGF1/HGF/IGF1/INSR/JAK2/KIT/PRKACA/MAPK1/MAP2K1/PTPN1/PTPN11/RAF1/CCL5/SRC/SYK/TGFB2/TGFBR1/TGFBR2/BIRC7	24
BP	GO:0009755	hormone-mediated signaling pathway	21/153	235/18670	4.13402E-16	5.33289E-14	2.46138E-14	PARP1/AR/RHOA/BMP7/CDK7/ESR1/ESR2/NR3C1/JAK2/PGR/PPARA/PPARG/PTPN11/RARA/RARB/RARG/RORA/RXRB/SRC/NR1H2/VDR	21
BP	GO:0043405	regulation of MAP kinase activity	24/153	337/18670	5.00263E-16	6.25784E-14	2.88828E-14	BMP2/BMP7/MAPK14/EGFR/FGF1/FGFR1/GSTP1/HGF/HRAS/IGF1/IGF1R/INSR/JAK2/KIT/PIK3CG/MAPK1/MAP2K1/PTPN1/PTPN11/RAF1/SRC/SYK/TGFBR1/BIRC7	24
BP	GO:0030522	intracellular receptor signaling pathway	22/153	280/18670	1.18677E-15	1.44088E-13	6.65035E-14	PARP1/XIAP/AR/RHOA/CDK7/ESR1/ESR2/NR3C1/HSPA1A/JAK2/PGR/PPARA/PPARG/RARA/RARB/RARG/RORA/RXRB/SRC/NR1H2/VDR/AKR1C3	22
BP	GO:0010631	epithelial cell migration	24/153	351/18670	1.25107E-15	1.47554E-13	6.81032E-14	ABL1/AKT1/RHOA/DPP4/EPHA2/EPHB4/FAP/FGF1/FGFR1/HMOX1/KDR/KIT/MET/MMP9/NOS3/PPARG/PTK2/PTPN11/SRC/ADAM17/TEK/TGFB2/TGFBR1/TGFBR2	24
BP	GO:0070371	ERK1 and ERK2 cascade	23/153	317/18670	1.436E-15	1.64661E-13	7.59988E-14	ABL1/BMP2/BRAF/EGFR/EPHA2/ERBB4/FGFR2/FGG/GSTP1/HRAS/IGF1/KDR/KIT/NQO2/PLA2G2A/MAPK1/MAP2K1/PTPN1/PTPN11/CCL5/SRC/SYK/TEK	23
BP	GO:0090132	epithelium migration	24/153	354/18670	1.51433E-15	1.6895E-13	7.79783E-14	ABL1/AKT1/RHOA/DPP4/EPHA2/EPHB4/FAP/FGF1/FGFR1/HMOX1/KDR/KIT/MET/MMP9/NOS3/PPARG/PTK2/PTPN11/SRC/ADAM17/TEK/TGFB2/TGFBR1/TGFBR2	24
BP	GO:0043434	response to peptide hormone	26/153	436/18670	1.94997E-15	2.11828E-13	9.77684E-14	PARP1/AKT1/AKT2/ANXA5/BMP7/CA2/CAT/GRB2/GSK3B/GSTP1/IGF1R/INSR/JAK2/JAK3/MDM2/PIK3R1/PPARA/PPARG/PRKACA/PTK2/PTPN1/PTPN11/REG1A/SRC/STAT1/TEK	26
BP	GO:0090130	tissue migration	24/153	360/18670	2.20652E-15	2.33552E-13	1.07795E-13	ABL1/AKT1/RHOA/DPP4/EPHA2/EPHB4/FAP/FGF1/FGFR1/HMOX1/KDR/KIT/MET/MMP9/NOS3/PPARG/PTK2/PTPN11/SRC/ADAM17/TEK/TGFB2/TGFBR1/TGFBR2	24
BP	GO:2000377	regulation of reactive oxygen species metabolic process	19/153	195/18670	2.30251E-15	2.37619E-13	1.09672E-13	AKT1/RHOA/BMP7/MAPK14/DHFR/EGFR/F2/GRB2/GSTP1/HSP90AA1/HSP90AB1/INSR/JAK2/MMP3/NQO2/RAC1/SYK/TGFBR2/AKR1C3	19
BP	GO:0043406	positive regulation of MAP kinase activity	21/153	258/18670	2.7311E-15	2.73883E-13	1.2641E-13	BMP2/MAPK14/EGFR/FGF1/FGFR1/HGF/HRAS/IGF1/INSR/JAK2/KIT/PIK3CG/MAPK1/MAP2K1/PTPN1/PTPN11/RAF1/SRC/SYK/TGFBR1/BIRC7	21
BP	GO:0022612	gland morphogenesis	16/153	120/18670	2.7866E-15	2.73883E-13	1.2641E-13	AR/BMP7/EGFR/EPHA2/ESR1/FGFR1/FGFR2/HGF/HPN/PGR/RARG/SRC/TGFB2/TGFBR2/TGM2/VDR	16
BP	GO:2001234	negative regulation of apoptotic signaling pathway	20/153	230/18670	3.68814E-15	3.54062E-13	1.63416E-13	AKT1/AR/BCL2L1/CSNK2A1/CTNNA1/FGG/GSTP1/HGF/HMOX1/HSPA1A/IGF1/LGALS3/MDM2/MMP9/NOS3/PTPN1/RAF1/SOD2/SRC/TGFBR1	20
BP	GO:0038083	peptidyl-tyrosine autophosphorylation	11/153	37/18670	5.53853E-15	5.19615E-13	2.39826E-13	ABL1/BTK/ACE/EGFR/IGF1R/INSR/ITK/KDR/PTK2/SRC/TNK2	11
BP	GO:0002446	neutrophil mediated immunity	27/153	499/18670	5.77065E-15	5.29361E-13	2.44325E-13	ALDOA/APAF1/RHOA/CAT/MAPK14/CTSB/CTSD/ACE/F2/GSTP1/HSPA1A/HSPA8/HSP90AA1/HSP90AB1/IMPDH1/LCN2/LGALS3/MME/MMP9/SERPINA1/PLAU/PPIA/MAPK1/RAC1/S100A9/SYK/ADAM17	27
BP	GO:2001237	negative regulation of extrinsic apoptotic signaling pathway	15/153	104/18670	6.413E-15	5.74963E-13	2.65372E-13	AKT1/AR/BCL2L1/CTNNA1/FGG/GSTP1/HGF/HMOX1/HSPA1A/IGF1/LGALS3/NOS3/RAF1/SRC/TGFBR1	15
BP	GO:0050678	regulation of epithelial cell proliferation	24/153	378/18670	6.54633E-15	5.74963E-13	2.65372E-13	AKT1/AR/BMP2/CDK6/EGFR/FGF1/FGFR1/FGFR2/HMOX1/HPN/HRAS/IGF1/KDR/MMP12/PGR/PPARG/REG1A/CCL5/STAT1/ADAM17/TEK/TGFB2/TGFBR1/VDR	24
BP	GO:0045927	positive regulation of growth	21/153	270/18670	6.79039E-15	5.83974E-13	2.69531E-13	AKT1/RHOA/CDC42/MAPK14/CSNK2A1/EGFR/ERBB4/F2/FGFR1/FGFR2/HPN/IGF1/IL2/INSR/MAPK1/REG1A/S100A9/ADAM17/TGFB2/TGFBR1/TGFBR2	21
BP	GO:0001667	ameboidal-type cell migration	26/153	461/18670	7.33033E-15	6.17543E-13	2.85024E-13	ABL1/AKT1/RHOA/BMP7/DPP4/EPHA2/EPHB4/ERBB4/FAP/FGF1/FGFR1/HMOX1/KDR/KIT/MET/MMP9/NOS3/PPARG/PTK2/PTPN11/SRC/ADAM17/TEK/TGFB2/TGFBR1/TGFBR2	26
BP	GO:0061138	morphogenesis of a branching epithelium	18/153	182/18670	1.00413E-14	8.29006E-13	3.82625E-13	ABL1/AR/BMP2/BMP7/EPHA2/ESR1/FGF1/FGFR1/FGFR2/GRB2/HGF/MET/PGR/SRC/ST14/TGFBR2/TGM2/VDR	18
BP	GO:0043281	regulation of cysteine-type endopeptidase activity involved in apoptotic process	19/153	215/18670	1.39876E-14	1.13217E-12	5.2255E-13	AKT1/APAF1/XIAP/RHOA/CASP1/CSNK2A1/CTSD/DAPK1/HGF/JAK2/MDM2/MMP9/PPARG/RAF1/S100A9/SRC/SYK/PRDX5/BIRC7	19
BP	GO:0071375	cellular response to peptide hormone stimulus	22/153	321/18670	2.02661E-14	1.60882E-12	7.42543E-13	PARP1/AKT1/AKT2/ANXA5/CA2/GRB2/GSK3B/GSTP1/IGF1R/INSR/JAK2/JAK3/MDM2/PIK3R1/PPARG/PRKACA/PTK2/PTPN1/PTPN11/REG1A/SRC/STAT1	22
BP	GO:0018209	peptidyl-serine modification	22/153	322/18670	2.16045E-14	1.6827E-12	7.76645E-13	PARP1/AKT1/AKT2/BRAF/CDK2/MAPK14/CSNK2A1/EGFR/GSK3B/HGF/HSP90AA1/HSP90AB1/PLK1/PRKACA/MAPK1/MAPK8/RAF1/SRC/AURKA/SYK/TGFBR1/TGFBR2	22
BP	GO:0001655	urogenital system development	22/153	330/18670	3.57462E-14	2.7326E-12	1.26122E-12	APAF1/AR/BMP2/BMP7/CA2/CAT/CYP19A1/ACE/ESR1/FGF1/FGFR1/FGFR2/MME/MMP9/RARA/RARB/RARG/RBP4/STAT1/TEK/TGFB2/TGFBR1	22
BP	GO:0001763	morphogenesis of a branching structure	18/153	196/18670	3.68867E-14	2.76852E-12	1.2778E-12	ABL1/AR/BMP2/BMP7/EPHA2/ESR1/FGF1/FGFR1/FGFR2/GRB2/HGF/MET/PGR/SRC/ST14/TGFBR2/TGM2/VDR	18
BP	GO:0048660	regulation of smooth muscle cell proliferation	17/153	169/18670	4.33689E-14	3.19691E-12	1.47552E-12	AKT1/EGFR/FGFR2/GSTP1/HMOX1/IGF1/JAK2/MDM2/MMP2/MMP9/NQO2/PPARG/CCL5/SOD2/STAT1/TGFBR2/TGM2	17
BP	GO:0018105	peptidyl-serine phosphorylation	21/153	299/18670	5.1355E-14	3.71918E-12	1.71657E-12	AKT1/AKT2/BRAF/CDK2/MAPK14/CSNK2A1/EGFR/GSK3B/HGF/HSP90AA1/HSP90AB1/PLK1/PRKACA/MAPK1/MAPK8/RAF1/SRC/AURKA/SYK/TGFBR1/TGFBR2	21
BP	GO:0048659	smooth muscle cell proliferation	17/153	171/18670	5.27696E-14	3.75574E-12	1.73345E-12	AKT1/EGFR/FGFR2/GSTP1/HMOX1/IGF1/JAK2/MDM2/MMP2/MMP9/NQO2/PPARG/CCL5/SOD2/STAT1/TGFBR2/TGM2	17
BP	GO:0070372	regulation of ERK1 and ERK2 cascade	21/153	300/18670	5.48436E-14	3.83719E-12	1.77104E-12	ABL1/BMP2/BRAF/EGFR/EPHA2/ERBB4/FGFR2/FGG/GSTP1/HRAS/KDR/KIT/NQO2/PLA2G2A/MAP2K1/PTPN1/PTPN11/CCL5/SRC/SYK/TEK	21
BP	GO:0042110	T cell activation	25/153	464/18670	7.19229E-14	4.9483E-12	2.28387E-12	ABL1/AKT1/RHOA/CASP3/CDC42/CDK6/DPP4/GRB2/IGF1/IL2/ITK/JAK3/KIT/LGALS3/PIK3CG/PIK3R1/PTPN11/RAC1/RARA/RORA/CCL5/SRC/SYK/ADAM17/TGFBR2	25
BP	GO:0071216	cellular response to biotic stimulus	19/153	236/18670	7.66281E-14	5.18559E-12	2.39339E-12	ABL1/AKT1/APAF1/RHOA/BTK/CASP1/MAPK14/GSK3B/GSTP1/LCN2/NOS2/NOS3/MAPK1/MAPK8/RARA/CCL5/SRC/SYK/NR1H2	19
BP	GO:0001101	response to acid chemical	22/153	343/18670	7.86894E-14	5.23919E-12	2.41813E-12	AKT1/RHOA/BCL2L1/CASP3/CAT/DHFR/NQO1/EGFR/FGFR2/GSTP1/KDR/MMP2/PPARG/RARA/RARB/RARG/RBP4/REG1A/RXRB/SRC/TYMS/AKR1C3	22
BP	GO:0050679	positive regulation of epithelial cell proliferation	18/153	206/18670	8.77611E-14	5.75044E-12	2.65409E-12	AKT1/AR/BMP2/EGFR/FGF1/FGFR1/FGFR2/HMOX1/HPN/HRAS/IGF1/KDR/MMP12/REG1A/CCL5/ADAM17/TEK/TGFBR1	18
BP	GO:1901653	cellular response to peptide	23/153	385/18670	9.15966E-14	5.90798E-12	2.72681E-12	PARP1/AKT1/AKT2/ANXA5/CA2/GRB2/GSK3B/GSTP1/IGF1/IGF1R/INSR/JAK2/JAK3/MDM2/PIK3R1/PPARG/PRKACA/PTK2/PTPN1/PTPN11/REG1A/SRC/STAT1	23
BP	GO:0048661	positive regulation of smooth muscle cell proliferation	14/153	101/18670	9.37013E-14	5.95075E-12	2.74655E-12	AKT1/EGFR/FGFR2/HMOX1/IGF1/JAK2/MDM2/MMP2/MMP9/NQO2/CCL5/STAT1/TGFBR2/TGM2	14
BP	GO:2000116	regulation of cysteine-type endopeptidase activity	19/153	239/18670	9.63388E-14	6.02556E-12	2.78107E-12	AKT1/APAF1/XIAP/RHOA/CASP1/CSNK2A1/CTSD/DAPK1/HGF/JAK2/MDM2/MMP9/PPARG/RAF1/S100A9/SRC/SYK/PRDX5/BIRC7	19
BP	GO:0030574	collagen catabolic process	11/153	47/18670	1.05198E-13	6.48144E-12	2.99149E-12	CTSB/CTSD/CTSL/FAP/MMP1/MMP2/MMP3/MMP7/MMP9/MMP12/MMP13	11
BP	GO:2000379	positive regulation of reactive oxygen species metabolic process	14/153	102/18670	1.07852E-13	6.54725E-12	3.02186E-12	AKT1/MAPK14/EGFR/F2/GRB2/GSTP1/HSP90AA1/HSP90AB1/INSR/JAK2/NQO2/SYK/TGFBR2/AKR1C3	14
BP	GO:0070482	response to oxygen levels	23/153	394/18670	1.48902E-13	8.90824E-12	4.11156E-12	AKT1/APAF1/RHOA/BMP2/BMP7/CASP3/CAT/DPP4/HMOX1/MDM2/MMP2/NOS2/PLAU/PPARA/PPARG/RAF1/REG1A/RORA/SRC/ADAM17/TEK/TGFB2/TGFBR2	23
BP	GO:2001236	regulation of extrinsic apoptotic signaling pathway	16/153	155/18670	1.67492E-13	9.87727E-12	4.55882E-12	AKT1/AR/BCL2L1/CTNNA1/FGFR1/FGG/GSTP1/HGF/HMOX1/HSPA1A/IGF1/LGALS3/NOS3/RAF1/SRC/TGFBR1	16
BP	GO:0097237	cellular response to toxic substance	19/153	247/18670	1.74631E-13	1.01532E-11	4.68616E-12	ABL1/ALB/BMP7/CAT/DHFR/NQO1/GSTM1/GSTP1/HGF/HMOX1/KDR/LCN2/MDM2/MET/NOS3/S100A9/SOD2/SRC/PRDX5	19
BP	GO:0016049	cell growth	25/153	484/18670	1.85558E-13	1.06387E-11	4.91024E-12	ABL1/AKT1/RHOA/CDC42/CSNK2A1/EGFR/ESR2/F2/GSK3B/HPN/HSPA1A/HSP90AA1/HSP90AB1/IGF1/IL2/PPARA/PPARG/RARG/REG1A/S100A9/AURKA/ADAM17/TGFB2/TGFBR1/TGFBR2	25
BP	GO:0001666	response to hypoxia	22/153	359/18670	1.98467E-13	1.12229E-11	5.17989E-12	AKT1/APAF1/RHOA/BMP2/BMP7/CASP3/CAT/DPP4/HMOX1/MDM2/MMP2/NOS2/PLAU/PPARA/RAF1/REG1A/RORA/SRC/ADAM17/TEK/TGFB2/TGFBR2	22
BP	GO:0060562	epithelial tube morphogenesis	21/153	322/18670	2.19196E-13	1.22276E-11	5.6436E-12	ABL1/APAF1/AR/RHOA/BMP2/BMP7/CASP3/EPHA2/ESR1/FGF1/FGFR2/MET/PGR/PRKACA/RARA/RARG/SRC/ST14/TGFB2/TGFBR2/VDR	21
BP	GO:0046677	response to antibiotic	21/153	327/18670	2.95803E-13	1.6281E-11	7.51443E-12	ABL1/RHOA/BCL2L1/CASP3/CAT/NQO1/FGFR2/GSTP1/HGF/HMOX1/HSP90AA1/IL2/JAK2/LCN2/MDM2/MET/RARA/RBP4/SRC/STAT1/TYMS	21
BP	GO:0042119	neutrophil activation	25/153	498/18670	3.50645E-13	1.90456E-11	8.79042E-12	ALDOA/APAF1/RHOA/CAT/MAPK14/CTSB/CTSD/GSTP1/HSPA1A/HSPA8/HSP90AA1/HSP90AB1/IMPDH1/LCN2/LGALS3/MME/MMP9/SERPINA1/PLAU/PPIA/MAPK1/RAC1/S100A9/CCL5/SYK	25
BP	GO:0036293	response to decreased oxygen levels	22/153	370/18670	3.64817E-13	1.94045E-11	8.95609E-12	AKT1/APAF1/RHOA/BMP2/BMP7/CASP3/CAT/DPP4/HMOX1/MDM2/MMP2/NOS2/PLAU/PPARA/RAF1/REG1A/RORA/SRC/ADAM17/TEK/TGFB2/TGFBR2	22
BP	GO:0031667	response to nutrient levels	25/153	499/18670	3.66655E-13	1.94045E-11	8.95609E-12	AKT1/ALB/APAF1/BMP7/CAT/NQO1/EGFR/GSTP1/HMOX1/HSPA8/LCN2/MDM2/MMP7/PPARA/PPARG/MAPK1/MAPK8/RARA/REG1A/SRC/STAT1/TGFBR2/TYMS/VDR/AKR1C3	25
BP	GO:0051098	regulation of binding	22/153	373/18670	4.29141E-13	2.2424E-11	1.03497E-11	ABL1/PARP1/AKT1/BMP2/ACE/GSK3B/HMOX1/HSP90AB1/IGF1/JAK2/LGALS3/MET/MMP9/PLK1/PPARA/PPARG/PRKACA/MAPK8/RARA/SRC/AURKA/TGFBR1	22
BP	GO:0007159	leukocyte cell-cell adhesion	21/153	337/18670	5.30381E-13	2.73677E-11	1.26315E-11	AKT1/RHOA/BMP7/CASP3/CDC42/DPP4/GRB2/IGF1/IL2/JAK3/LGALS3/PIK3R1/PPARA/PTPN11/RAC1/RARA/S100A9/CCL5/SRC/SYK/TGFBR2	21
BP	GO:0061180	mammary gland epithelium development	12/153	72/18670	5.96921E-13	3.04208E-11	1.40406E-11	AKT1/AKT2/AR/EPHA2/ERBB4/ESR1/FGFR2/JAK2/PGR/MAPK1/SRC/VDR	12
BP	GO:0043062	extracellular structure organization	23/153	422/18670	6.23952E-13	3.14107E-11	1.44975E-11	ABL1/ALB/BMP7/CTSL/DPP4/FAP/FGG/HPN/ICAM2/KDR/MMP1/MMP2/MMP3/MMP7/MMP9/MMP12/MMP13/PLA2G2A/PLG/PRKACA/PTK2/TGFB2/TGFBR1	23
BP	GO:0030879	mammary gland development	15/153	143/18670	7.82711E-13	3.89281E-11	1.79671E-11	AKT1/AKT2/AR/CYP19A1/EPHA2/ERBB4/ESR1/FGFR2/JAK2/PGR/MAPK1/SRC/TGFBR2/UMPS/VDR	15
BP	GO:0045787	positive regulation of cell cycle	22/153	389/18670	9.9521E-13	4.89075E-11	2.25731E-11	ABL1/AKT1/RHOA/CDC42/CDK2/CHEK1/EGFR/EIF4E/FAP/FGFR1/FGFR2/HSP90AB1/IGF1/INSR/MDM2/PRKACA/PTPN11/RARA/SRC/AURKA/ADAM17/TGFB2	22
BP	GO:0043312	neutrophil degranulation	24/153	485/18670	1.48567E-12	7.13121E-11	3.29138E-11	ALDOA/APAF1/RHOA/CAT/MAPK14/CTSB/CTSD/GSTP1/HSPA1A/HSPA8/HSP90AA1/HSP90AB1/IMPDH1/LCN2/LGALS3/MME/MMP9/SERPINA1/PLAU/PPIA/MAPK1/RAC1/S100A9/SYK	24
BP	GO:0050727	regulation of inflammatory response	24/153	485/18670	1.48567E-12	7.13121E-11	3.29138E-11	XIAP/BTK/MAPK14/CYP19A1/EGFR/ESR1/F2/GSTP1/HGF/IGF1/IL2/JAK2/MMP3/MMP9/NOS2/PIK3CG/PLA2G2A/PPARA/PPARG/RORA/S100A9/CCL5/TEK/TGM2	24
BP	GO:0009612	response to mechanical stimulus	17/153	210/18670	1.54786E-12	7.34432E-11	3.38974E-11	AKT1/RHOA/CASP1/CHEK1/MAPK14/EGFR/HPN/KIT/MMP7/PPARG/MAPK8/PTPN11/RAC1/RAF1/SRC/STAT1/TGFBR2	17
BP	GO:0002283	neutrophil activation involved in immune response	24/153	488/18670	1.69404E-12	7.94658E-11	3.66771E-11	ALDOA/APAF1/RHOA/CAT/MAPK14/CTSB/CTSD/GSTP1/HSPA1A/HSPA8/HSP90AA1/HSP90AB1/IMPDH1/LCN2/LGALS3/MME/MMP9/SERPINA1/PLAU/PPIA/MAPK1/RAC1/S100A9/SYK	24
BP	GO:0001890	placenta development	15/153	152/18670	1.92378E-12	8.92287E-11	4.11832E-11	AKT1/BMP7/MAPK14/CTSB/EGFR/FGFR2/GRB2/HSP90AB1/MME/PPARG/MAPK1/MAP2K1/PTK2/ST14/VDR	15
BP	GO:0070374	positive regulation of ERK1 and ERK2 cascade	17/153	215/18670	2.26606E-12	1.03937E-10	4.79716E-11	ABL1/BMP2/BRAF/EGFR/ERBB4/FGFR2/FGG/HRAS/KDR/KIT/NQO2/PLA2G2A/MAP2K1/PTPN11/CCL5/SRC/TEK	17
BP	GO:0045088	regulation of innate immune response	23/153	452/18670	2.5722E-12	1.16682E-10	5.38541E-11	XIAP/BTK/CTSB/CTSL/ESR1/FGG/HRAS/HSPA1A/HSP90AB1/ICAM2/JAK2/MMP12/PPARG/PRKACA/PTPN1/PTPN11/RAF1/S100A9/CCL5/SRC/STAT1/SYK/NR1H2	23
BP	GO:0097193	intrinsic apoptotic signaling pathway	19/153	289/18670	2.86968E-12	1.28761E-10	5.94293E-11	ABL1/PARP1/AKT1/APAF1/BCL2L1/CASP3/EPHA2/FHIT/HMOX1/HRAS/HSPA1A/JAK2/MDM2/MMP9/PIK3R1/PTPN1/S100A9/SOD2/SRC	19
BP	GO:2000027	regulation of animal organ morphogenesis	18/153	253/18670	2.96283E-12	1.31512E-10	6.06987E-11	ABL1/AR/RHOA/BMP2/BMP7/CDC42/ESR1/FGF1/FGFR1/FGFR2/HGF/HPN/RAC1/STAT1/TGFB2/TGFBR1/TGFBR2/VDR	18
BP	GO:1904951	positive regulation of establishment of protein localization	23/153	456/18670	3.08091E-12	1.35298E-10	6.24461E-11	ABL1/AKT2/CASP1/MAPK14/EGFR/FGG/GSK3B/HRAS/IGF1/IL2/JAK2/MDM2/MMP12/PIK3R1/PPIA/PRKACA/MAPK1/MAPK8/RAC1/RBP4/SRC/SYK/TGFB2	23
BP	GO:0022409	positive regulation of cell-cell adhesion	18/153	255/18670	3.38378E-12	1.47034E-10	6.7863E-11	AKT1/RHOA/BMP7/CDC42/DPP4/FGG/GRB2/IGF1/IL2/JAK3/PIK3R1/PTPN11/RAC1/RARA/CCL5/SRC/SYK/TGFBR2	18
BP	GO:0051222	positive regulation of protein transport	22/153	418/18670	4.14315E-12	1.78155E-10	8.22269E-11	ABL1/AKT2/CASP1/MAPK14/EGFR/FGG/GSK3B/HRAS/IGF1/IL2/JAK2/MDM2/MMP12/PIK3R1/PPIA/PRKACA/MAPK1/RAC1/RBP4/SRC/SYK/TGFB2	22
BP	GO:1903037	regulation of leukocyte cell-cell adhesion	19/153	304/18670	6.97574E-12	2.96865E-10	1.37017E-10	AKT1/RHOA/CASP3/CDC42/DPP4/GRB2/IGF1/IL2/JAK3/LGALS3/PIK3R1/PPARA/PTPN11/RAC1/RARA/CCL5/SRC/SYK/TGFBR2	19
BP	GO:0097305	response to alcohol	17/153	233/18670	8.25794E-12	3.47845E-10	1.60546E-10	PARP1/AKT1/RHOA/BCL2L1/CAT/CTNNA1/NQO1/FGFR2/GSTP1/IL2/PPARG/RARA/RBP4/TGFBR1/TGFBR2/TYMS/AKR1C3	17
BP	GO:0050870	positive regulation of T cell activation	16/153	202/18670	1.01234E-11	4.22116E-10	1.94826E-10	AKT1/RHOA/CDC42/DPP4/GRB2/IGF1/IL2/JAK3/PIK3R1/PTPN11/RAC1/RARA/CCL5/SRC/SYK/TGFBR2	16
BP	GO:0043542	endothelial cell migration	18/153	273/18670	1.06268E-11	4.3716E-10	2.0177E-10	ABL1/AKT1/RHOA/DPP4/EPHA2/EPHB4/FAP/FGF1/FGFR1/HMOX1/KDR/MET/NOS3/PPARG/PTK2/ADAM17/TEK/TGFBR1	18
BP	GO:0032963	collagen metabolic process	13/153	115/18670	1.0696E-11	4.3716E-10	2.0177E-10	CTSB/CTSD/CTSL/F2/FAP/MMP1/MMP2/MMP3/MMP7/MMP9/MMP12/MMP13/PPARG	13
BP	GO:0038127	ERBB signaling pathway	14/153	142/18670	1.09954E-11	4.4499E-10	2.05384E-10	ABL1/AKT1/CDC42/EGFR/ERBB4/GRB2/HSP90AA1/MMP9/PIK3R1/MAPK1/PTK2/PTPN11/SRC/ADAM17	14
BP	GO:0050863	regulation of T cell activation	19/153	314/18670	1.2267E-11	4.91634E-10	2.26912E-10	ABL1/AKT1/RHOA/CASP3/CDC42/DPP4/GRB2/IGF1/IL2/JAK3/LGALS3/PIK3R1/PTPN11/RAC1/RARA/CCL5/SRC/SYK/TGFBR2	19
BP	GO:1903829	positive regulation of cellular protein localization	19/153	324/18670	2.11347E-11	8.38884E-10	3.87184E-10	PARP1/AKT1/AKT2/MAPK14/EGFR/EPHA2/ERBB4/F2/GSK3B/HRAS/HSP90AB1/LGALS3/MDM2/PIK3R1/PLK1/PRKACA/MAPK1/MAPK8/SRC	19
BP	GO:0010810	regulation of cell-substrate adhesion	16/153	215/18670	2.60492E-11	1.02411E-09	4.72672E-10	ABL1/RHOA/CDC42/CDK6/FGG/GSK3B/JAK2/KDR/MMP12/PIK3R1/PLAU/PLG/PTK2/RAC1/SRC/TEK	16
BP	GO:0032496	response to lipopolysaccharide	19/153	330/18670	2.90211E-11	1.12067E-09	5.17242E-10	ABL1/AKT1/RHOA/CASP1/CASP3/MAPK14/FGFR2/GSTP1/JAK2/LCN2/NOS2/NOS3/MAPK1/MAPK8/RARA/CCL5/SRC/ADAM17/NR1H2	19
BP	GO:0030099	myeloid cell differentiation	21/153	416/18670	2.90484E-11	1.12067E-09	5.17242E-10	PARP1/CA2/CASP3/CDC42/CDK6/MAPK14/EPHA2/HSPA1A/JAK2/JAK3/KIT/LGALS3/MMP9/PIK3R1/PPARG/PTPN11/RARA/RARG/SRC/STAT1/TGFBR2	21
BP	GO:0043393	regulation of protein binding	16/153	217/18670	2.99521E-11	1.14484E-09	5.28395E-10	ABL1/AKT1/BMP2/ACE/GSK3B/HSP90AB1/LGALS3/MET/MMP9/PLK1/PPARA/PRKACA/MAPK8/SRC/AURKA/TGFBR1	16
BP	GO:0010632	regulation of epithelial cell migration	18/153	291/18670	3.06934E-11	1.16241E-09	5.36505E-10	ABL1/AKT1/RHOA/EPHA2/FGF1/FGFR1/HMOX1/KDR/MET/MMP9/NOS3/PPARG/PTK2/SRC/ADAM17/TEK/TGFB2/TGFBR2	18
BP	GO:1903039	positive regulation of leukocyte cell-cell adhesion	16/153	218/18670	3.21E-11	1.20463E-09	5.55991E-10	AKT1/RHOA/CDC42/DPP4/GRB2/IGF1/IL2/JAK3/PIK3R1/PTPN11/RAC1/RARA/CCL5/SRC/SYK/TGFBR2	16
BP	GO:0072001	renal system development	18/153	293/18670	3.43706E-11	1.27822E-09	5.89956E-10	APAF1/BMP2/BMP7/CA2/CAT/ACE/FGF1/FGFR1/FGFR2/MME/MMP9/RARA/RARB/RBP4/STAT1/TEK/TGFB2/TGFBR1	18
BP	GO:0007596	blood coagulation	19/153	336/18670	3.95862E-11	1.45903E-09	6.73411E-10	ANXA5/CDC42/F2/FAP/FGG/JAK2/NOS3/SERPINA1/PIK3CG/PIK3R1/PLAU/PLG/PRKACA/MAPK1/PTPN11/RAC1/RAF1/SRC/SYK	19
BP	GO:0006367	transcription initiation from RNA polymerase II promoter	15/153	188/18670	4.1753E-11	1.52528E-09	7.03987E-10	AR/CDK7/ESR1/ESR2/NR3C1/PGR/PPARA/PPARG/RARA/RARB/RARG/RORA/RXRB/NR1H2/VDR	15
BP	GO:0022617	extracellular matrix disassembly	11/153	80/18670	5.0231E-11	1.81889E-09	8.39502E-10	CTSL/DPP4/FAP/MMP1/MMP2/MMP3/MMP7/MMP9/MMP12/MMP13/PLG	11
BP	GO:0007599	hemostasis	19/153	341/18670	5.10235E-11	1.83152E-09	8.45332E-10	ANXA5/CDC42/F2/FAP/FGG/JAK2/NOS3/SERPINA1/PIK3CG/PIK3R1/PLAU/PLG/PRKACA/MAPK1/PTPN11/RAC1/RAF1/SRC/SYK	19
BP	GO:0050817	coagulation	19/153	342/18670	5.36523E-11	1.90928E-09	8.81223E-10	ANXA5/CDC42/F2/FAP/FGG/JAK2/NOS3/SERPINA1/PIK3CG/PIK3R1/PLAU/PLG/PRKACA/MAPK1/PTPN11/RAC1/RAF1/SRC/SYK	19
BP	GO:0050731	positive regulation of peptidyl-tyrosine phosphorylation	15/153	192/18670	5.63678E-11	1.97329E-09	9.10764E-10	ABL1/ACE/ERBB4/HGF/IGF1/IL2/JAK2/KIT/PTPN1/PTPN11/CCL5/SRC/SYK/ADAM17/TNK2	15
BP	GO:0002237	response to molecule of bacterial origin	19/153	343/18670	5.6407E-11	1.97329E-09	9.10764E-10	ABL1/AKT1/RHOA/CASP1/CASP3/MAPK14/FGFR2/GSTP1/JAK2/LCN2/NOS2/NOS3/MAPK1/MAPK8/RARA/CCL5/SRC/ADAM17/NR1H2	19
BP	GO:0110110	positive regulation of animal organ morphogenesis	11/153	81/18670	5.7719E-11	2.00222E-09	9.24116E-10	AR/BMP2/BMP7/FGF1/FGFR1/FGFR2/HPN/TGFB2/TGFBR1/TGFBR2/VDR	11
BP	GO:0060326	cell chemotaxis	18/153	304/18670	6.30509E-11	2.16895E-09	1.00107E-09	MAPK14/CYP19A1/EPHA2/FGF1/FGFR1/GSTP1/HGF/KDR/KIT/LGALS3/MET/PIK3CG/RAC1/S100A9/CCL5/SYK/ADAM17/TGFB2	18
BP	GO:0070997	neuron death	19/153	348/18670	7.22686E-11	2.46549E-09	1.13794E-09	ABL1/PARP1/AKT1/AKT2/APAF1/RHOA/BCL2L1/CASP3/NQO1/GSK3B/HMOX1/HRAS/HSP90AB1/JAK2/NQO2/PPARA/CCL5/SOD2/TGFB2	19
BP	GO:0007548	sex differentiation	17/153	270/18670	8.50363E-11	2.8773E-09	1.32801E-09	AR/BCL2L1/CASP3/CTNNA1/CYP19A1/ESR1/INSR/KIT/NOS3/PGR/PTPN11/RARA/RBP4/SRC/TGFB2/TGFBR1/AKR1C3	17
BP	GO:0031099	regeneration	15/153	198/18670	8.72696E-11	2.92885E-09	1.3518E-09	CTNNA1/DHFR/EGFR/ERBB4/GSTP1/HGF/HMOX1/IGF1/JAK2/PPARG/MAP2K1/REG1A/AURKA/TGFBR2/TYMS	15
BP	GO:0033628	regulation of cell adhesion mediated by integrin	9/153	46/18670	1.11881E-10	3.7139E-09	1.71414E-09	DPP4/EPHA2/PIK3CG/PLAU/PTK2/PTPN11/CCL5/SYK/TGFB2	9
BP	GO:0048013	ephrin receptor signaling pathway	11/153	86/18670	1.12461E-10	3.7139E-09	1.71414E-09	RHOA/CDC42/EPHA2/EPHB4/HRAS/MMP2/MMP9/PTK2/PTPN11/RAC1/SRC	11
BP	GO:0030307	positive regulation of cell growth	14/153	169/18670	1.16093E-10	3.80343E-09	1.75546E-09	AKT1/RHOA/CDC42/CSNK2A1/EGFR/F2/HPN/IGF1/IL2/REG1A/S100A9/ADAM17/TGFB2/TGFBR1	14
BP	GO:0050900	leukocyte migration	22/153	499/18670	1.2849E-10	4.17643E-09	1.92762E-09	AKT1/RHOA/MAPK14/CYP19A1/F2/GRB2/HMOX1/KIT/LGALS3/MMP1/PIK3CG/PIK3R1/PPIA/PTPN11/RAC1/S100A9/CCL5/SRC/SYK/ADAM17/TEK/TGFB2	22
BP	GO:0001822	kidney development	17/153	278/18670	1.34143E-10	4.31466E-09	1.99142E-09	APAF1/BMP2/BMP7/CA2/CAT/ACE/FGF1/FGFR1/FGFR2/MME/MMP9/RARA/RARB/STAT1/TEK/TGFB2/TGFBR1	17
BP	GO:0052547	regulation of peptidase activity	21/153	452/18670	1.35068E-10	4.31466E-09	1.99142E-09	AKT1/APAF1/XIAP/RHOA/CASP1/MAPK14/CSNK2A1/CTSD/DAPK1/HGF/JAK2/MDM2/MMP9/SERPINA1/PPARG/RAF1/S100A9/SRC/SYK/PRDX5/BIRC7	21
BP	GO:0010634	positive regulation of epithelial cell migration	14/153	171/18670	1.35878E-10	4.31466E-09	1.99142E-09	ABL1/AKT1/FGF1/FGFR1/HMOX1/KDR/MET/MMP9/NOS3/SRC/ADAM17/TEK/TGFB2/TGFBR2	14
BP	GO:0071222	cellular response to lipopolysaccharide	15/153	205/18670	1.42632E-10	4.49455E-09	2.07444E-09	ABL1/AKT1/RHOA/CASP1/MAPK14/GSTP1/LCN2/NOS2/NOS3/MAPK1/MAPK8/RARA/CCL5/SRC/NR1H2	15
BP	GO:0046620	regulation of organ growth	12/153	113/18670	1.44079E-10	4.50574E-09	2.07961E-09	AKT1/MAPK14/ERBB4/FGFR1/FGFR2/IGF1/PPARA/MAPK1/PTK2/RBP4/TGFBR1/TGFBR2	12
BP	GO:0045862	positive regulation of proteolysis	19/153	363/18670	1.48324E-10	4.60362E-09	2.12479E-09	AKT1/APAF1/RHOA/CASP1/MAPK14/CTSD/DAPK1/GSK3B/HPN/HSPA1A/JAK2/MDM2/PLK1/PPARG/PTK2/S100A9/SRC/AURKA/SYK	19
BP	GO:0007568	aging	18/153	321/18670	1.53406E-10	4.72581E-09	2.18118E-09	ABL1/AKT1/APAF1/CAT/CDK6/CHEK1/MAPK14/CTNNA1/NQO1/GRB2/HRAS/MME/MMP7/MAPK1/MAP2K1/SOD2/TGFBR2/TYMS	18
BP	GO:0030198	extracellular matrix organization	19/153	368/18670	1.8704E-10	5.71928E-09	2.63971E-09	ABL1/CTSL/DPP4/FAP/FGG/HPN/ICAM2/KDR/MMP1/MMP2/MMP3/MMP7/MMP9/MMP12/MMP13/PLG/PTK2/TGFB2/TGFBR1	19
BP	GO:0035690	cellular response to drug	19/153	369/18670	1.95833E-10	5.92313E-09	2.7338E-09	ABL1/CDK2/CTNNA1/NQO1/EGFR/EIF4E/NR3C1/HGF/HMOX1/HSP90AB1/KDR/LCN2/MDM2/MET/MMP3/NOS2/MAPK1/SRC/UMPS	19
BP	GO:0033627	cell adhesion mediated by integrin	10/153	68/18670	1.96577E-10	5.92313E-09	2.7338E-09	DPP4/EPHA2/PIK3CG/PLAU/PTK2/PTPN11/CCL5/SYK/ADAM17/TGFB2	10
BP	GO:0001558	regulation of cell growth	20/153	416/18670	2.11708E-10	6.33282E-09	2.92289E-09	ABL1/AKT1/RHOA/CDC42/CSNK2A1/EGFR/ESR2/F2/GSK3B/HPN/HSPA1A/IGF1/IL2/PPARA/PPARG/REG1A/S100A9/ADAM17/TGFB2/TGFBR1	20
BP	GO:0001959	regulation of cytokine-mediated signaling pathway	14/153	177/18670	2.1521E-10	6.39129E-09	2.94987E-09	CASP1/GSTP1/HSPA1A/HSP90AB1/JAK2/MMP12/PPARG/PTPN1/PTPN11/CCL5/STAT1/SYK/ADAM17/NR1H2	14
BP	GO:0071219	cellular response to molecule of bacterial origin	15/153	212/18670	2.28776E-10	6.74562E-09	3.11342E-09	ABL1/AKT1/RHOA/CASP1/MAPK14/GSTP1/LCN2/NOS2/NOS3/MAPK1/MAPK8/RARA/CCL5/SRC/NR1H2	15
BP	GO:0007162	negative regulation of cell adhesion	17/153	289/18670	2.45039E-10	7.17392E-09	3.3111E-09	ABL1/AKT1/RHOA/BMP2/CASP3/FGG/IL2/JAK2/JAK3/LGALS3/MMP12/PIK3R1/PLG/PPARA/PTK2/PTPN11/SRC	17
BP	GO:0048771	tissue remodeling	14/153	179/18670	2.4988E-10	7.23377E-09	3.33872E-09	CA2/ACE/EGFR/EPHA2/IL2/MDM2/MMP2/NOS3/PLG/RAC1/SRC/SYK/TGM2/VDR	14
BP	GO:0071214	cellular response to abiotic stimulus	18/153	331/18670	2.52341E-10	7.23377E-09	3.33872E-09	PARP1/AKT1/AKT2/BCL2L1/CASP1/CASP3/CHEK1/MAPK14/EGFR/GRB2/HRAS/MDM2/MME/MMP7/PIK3R1/MAPK8/PTPN11/RAC1	18
BP	GO:0104004	cellular response to environmental stimulus	18/153	331/18670	2.52341E-10	7.23377E-09	3.33872E-09	PARP1/AKT1/AKT2/BCL2L1/CASP1/CASP3/CHEK1/MAPK14/EGFR/GRB2/HRAS/MDM2/MME/MMP7/PIK3R1/MAPK8/PTPN11/RAC1	18
BP	GO:0001952	regulation of cell-matrix adhesion	12/153	119/18670	2.65262E-10	7.55172E-09	3.48547E-09	ABL1/RHOA/CDK6/GSK3B/KDR/MMP12/PIK3R1/PLAU/PTK2/RAC1/SRC/TEK	12
BP	GO:0052548	regulation of endopeptidase activity	20/153	425/18670	3.08309E-10	8.71713E-09	4.02336E-09	AKT1/APAF1/XIAP/RHOA/CASP1/CSNK2A1/CTSD/DAPK1/HGF/JAK2/MDM2/MMP9/SERPINA1/PPARG/RAF1/S100A9/SRC/SYK/PRDX5/BIRC7	20
BP	GO:0048754	branching morphogenesis of an epithelial tube	13/153	150/18670	3.13601E-10	8.80643E-09	4.06458E-09	ABL1/AR/BMP2/BMP7/EPHA2/ESR1/FGF1/FGFR2/MET/PGR/SRC/TGFBR2/VDR	13
BP	GO:0008406	gonad development	15/153	217/18670	3.17165E-10	8.84635E-09	4.083E-09	AR/BCL2L1/CASP3/CTNNA1/CYP19A1/ESR1/INSR/KIT/NOS3/PGR/RARA/SRC/TGFB2/TGFBR1/AKR1C3	15
BP	GO:0048568	embryonic organ development	20/153	428/18670	3.48728E-10	9.63765E-09	4.44822E-09	AKT1/BMP7/EGFR/EPHA2/FGFR1/FGFR2/GRB2/HPN/KDR/KIT/MAPK1/MAP2K1/RARA/RARB/RARG/RBP4/ST14/TGFB2/TGFBR1/TGFBR2	20
BP	GO:0050730	regulation of peptidyl-tyrosine phosphorylation	16/153	256/18670	3.50818E-10	9.63765E-09	4.44822E-09	ABL1/ACE/EGFR/ERBB4/HGF/IGF1/IL2/JAK2/KIT/PTPN1/PTPN11/CCL5/SRC/SYK/ADAM17/TNK2	16
BP	GO:0060193	positive regulation of lipase activity	10/153	72/18670	3.5254E-10	9.63765E-09	4.44822E-09	RHOA/EGFR/ESR1/FGFR1/FGFR2/HRAS/ITK/KIT/CCL5/NR1H2	10
BP	GO:0007584	response to nutrient	15/153	219/18670	3.60571E-10	9.79234E-09	4.51962E-09	APAF1/BMP7/CAT/NQO1/EGFR/GSTP1/HMOX1/MDM2/PPARG/RARA/STAT1/TGFBR2/TYMS/VDR/AKR1C3	15
BP	GO:0000187	activation of MAPK activity	13/153	152/18670	3.70017E-10	9.94666E-09	4.59084E-09	BMP2/MAPK14/FGF1/HGF/IGF1/INSR/KIT/MAPK1/MAP2K1/PTPN1/PTPN11/SYK/BIRC7	13
BP	GO:0071496	cellular response to external stimulus	18/153	339/18670	3.71072E-10	9.94666E-09	4.59084E-09	AKT1/ALB/CASP1/CHEK1/EGFR/GSTP1/HMOX1/HSPA8/LCN2/MDM2/MMP7/PPARG/MAPK1/MAPK8/PTPN11/RAC1/VDR/AKR1C3	18
BP	GO:0043627	response to estrogen	10/153	73/18670	4.05655E-10	1.08035E-08	4.98632E-09	CA2/CTNNA1/ESR1/HMOX1/MDM2/PPARG/MAPK1/RARA/TEK/TGFBR2	10
BP	GO:0045137	development of primary sexual characteristics	15/153	223/18670	4.6416E-10	1.22824E-08	5.66889E-09	AR/BCL2L1/CASP3/CTNNA1/CYP19A1/ESR1/INSR/KIT/NOS3/PGR/RARA/SRC/TGFB2/TGFBR1/AKR1C3	15
BP	GO:0060191	regulation of lipase activity	11/153	98/18670	4.73567E-10	1.24515E-08	5.74694E-09	ABL1/RHOA/EGFR/ESR1/FGFR1/FGFR2/HRAS/ITK/KIT/CCL5/NR1H2	11
BP	GO:1904645	response to amyloid-beta	9/153	54/18670	5.10788E-10	1.33451E-08	6.1594E-09	PARP1/GSK3B/IGF1/IGF1R/MMP2/MMP3/MMP9/MMP12/MMP13	9
BP	GO:0018107	peptidyl-threonine phosphorylation	12/153	126/18670	5.18259E-10	1.34552E-08	6.21019E-09	AKT1/BMP7/CHEK1/CSNK2A1/GSK3B/PLK1/PRKACA/MAPK1/MAPK8/MAP2K1/TGFBR1/TGFBR2	12
BP	GO:0060759	regulation of response to cytokine stimulus	14/153	190/18670	5.49986E-10	1.41896E-08	6.54917E-09	CASP1/GSTP1/HSPA1A/HSP90AB1/JAK2/MMP12/PPARG/PTPN1/PTPN11/CCL5/STAT1/SYK/ADAM17/NR1H2	14
BP	GO:0055024	regulation of cardiac muscle tissue development	11/153	100/18670	5.90288E-10	1.51348E-08	6.98543E-09	BMP2/MAPK14/ERBB4/FGFR1/FGFR2/IGF1/PPARA/MAPK1/RBP4/TGFBR1/TGFBR2	11
BP	GO:0006809	nitric oxide biosynthetic process	10/153	77/18670	6.96476E-10	1.76855E-08	8.16266E-09	AKT1/NQO1/HSP90AA1/HSP90AB1/INSR/JAK2/NOS2/NOS3/RAC1/RORA	10
BP	GO:0001503	ossification	19/153	398/18670	6.98336E-10	1.76855E-08	8.16266E-09	AKT1/RHOA/BMP2/BMP7/CAT/CDK6/MAPK14/EGFR/EPHA2/FGFR2/HGF/IGF1/MMP2/MMP13/PRKACA/MAPK1/PTK2/TEK/TGFB2	19
BP	GO:0055021	regulation of cardiac muscle tissue growth	10/153	78/18670	7.93338E-10	1.99689E-08	9.21657E-09	MAPK14/ERBB4/FGFR1/FGFR2/IGF1/PPARA/MAPK1/RBP4/TGFBR1/TGFBR2	10
BP	GO:1901214	regulation of neuron death	17/153	313/18670	8.35456E-10	2.09016E-08	9.64705E-09	ABL1/PARP1/AKT1/RHOA/BCL2L1/CASP3/NQO1/GSK3B/HMOX1/HRAS/HSP90AB1/JAK2/NQO2/PPARA/CCL5/SOD2/TGFB2	17
BP	GO:0032868	response to insulin	16/153	272/18670	8.51779E-10	2.10993E-08	9.73832E-09	PARP1/AKT1/AKT2/CAT/GRB2/GSK3B/GSTP1/IGF1R/INSR/PIK3R1/PPARA/PPARG/PTPN1/PTPN11/SRC/STAT1	16
BP	GO:0048738	cardiac muscle tissue development	15/153	233/18670	8.53582E-10	2.10993E-08	9.73832E-09	BMP2/BMP7/MAPK14/ERBB4/FGFR1/FGFR2/IGF1/PPARA/MAPK1/RARA/RARB/RBP4/TGFB2/TGFBR1/TGFBR2	15
BP	GO:0060541	respiratory system development	14/153	198/18670	9.45395E-10	2.32297E-08	1.07216E-08	EGFR/EIF4E/FGF1/FGFR1/FGFR2/MME/NOS3/PGR/MAPK1/MAP2K1/RARA/RARG/RBP4/TGFBR2	14
BP	GO:0055017	cardiac muscle tissue growth	11/153	105/18670	1.00269E-09	2.44916E-08	1.1304E-08	MAPK14/ERBB4/FGFR1/FGFR2/IGF1/PPARA/MAPK1/RBP4/TGFB2/TGFBR1/TGFBR2	11
BP	GO:0018210	peptidyl-threonine modification	12/153	134/18670	1.06038E-09	2.57485E-08	1.18841E-08	AKT1/BMP7/CHEK1/CSNK2A1/GSK3B/PLK1/PRKACA/MAPK1/MAPK8/MAP2K1/TGFBR1/TGFBR2	12
BP	GO:0014855	striated muscle cell proliferation	10/153	81/18670	1.15972E-09	2.79961E-08	1.29215E-08	MAPK14/ERBB4/FGFR1/FGFR2/JAK2/MAPK1/RBP4/TGFB2/TGFBR1/TGFBR2	10
BP	GO:0062012	regulation of small molecule metabolic process	20/153	459/18670	1.17551E-09	2.82122E-08	1.30212E-08	PARP1/AKT1/AKT2/RHOA/BMP2/NQO1/FGF1/GSK3B/IGF1/INSR/KIT/NOS2/NOS3/PPARA/PPARG/RORA/SRC/NR1H2/VDR/AKR1C3	20
BP	GO:0046209	nitric oxide metabolic process	10/153	82/18670	1.3116E-09	3.12964E-08	1.44447E-08	AKT1/NQO1/HSP90AA1/HSP90AB1/INSR/JAK2/NOS2/NOS3/RAC1/RORA	10
BP	GO:0032103	positive regulation of response to external stimulus	17/153	323/18670	1.3487E-09	3.19967E-08	1.4768E-08	BTK/MAPK14/EGFR/F2/FGFR1/IL2/JAK2/KDR/MET/PIK3CG/PLA2G2A/PLG/RAC1/S100A9/CCL5/ADAM17/TGM2	17
BP	GO:0038093	Fc receptor signaling pathway	15/153	241/18670	1.36034E-09	3.20886E-08	1.48104E-08	ABL1/BTK/CDC42/GRB2/HSP90AA1/HSP90AB1/ITK/KIT/PIK3R1/MAPK1/MAPK8/PTK2/RAC1/SRC/SYK	15
BP	GO:0043154	negative regulation of cysteine-type endopeptidase activity involved in apoptotic process	10/153	84/18670	1.66931E-09	3.89317E-08	1.79688E-08	AKT1/XIAP/CSNK2A1/HGF/MDM2/MMP9/RAF1/SRC/PRDX5/BIRC7	10
BP	GO:0060420	regulation of heart growth	10/153	84/18670	1.66931E-09	3.89317E-08	1.79688E-08	MAPK14/ERBB4/FGFR1/FGFR2/IGF1/PPARA/MAPK1/RBP4/TGFBR1/TGFBR2	10
BP	GO:0048872	homeostasis of number of cells	15/153	246/18670	1.80403E-09	4.18373E-08	1.93098E-08	ABL1/AKT1/CASP3/CDK6/MAPK14/HMOX1/HSPA1A/IL2/JAK2/JAK3/KIT/NOS3/PTPN11/STAT1/ADAM17	15
BP	GO:1904705	regulation of vascular smooth muscle cell proliferation	10/153	85/18670	1.87871E-09	4.28472E-08	1.97759E-08	GSTP1/HMOX1/IGF1/JAK2/MDM2/MMP2/MMP9/NQO2/PPARG/SOD2	10
BP	GO:1990874	vascular smooth muscle cell proliferation	10/153	85/18670	1.87871E-09	4.28472E-08	1.97759E-08	GSTP1/HMOX1/IGF1/JAK2/MDM2/MMP2/MMP9/NQO2/PPARG/SOD2	10
BP	GO:2001057	reactive nitrogen species metabolic process	10/153	85/18670	1.87871E-09	4.28472E-08	1.97759E-08	AKT1/NQO1/HSP90AA1/HSP90AB1/INSR/JAK2/NOS2/NOS3/RAC1/RORA	10
BP	GO:0050708	regulation of protein secretion	20/153	472/18670	1.90045E-09	4.31048E-08	1.98949E-08	ABL1/ANXA5/CASP1/MAPK14/DPP4/EGFR/FGG/IGF1/IL2/JAK2/MMP12/NOS2/PPIA/PTPN11/RAC1/RBP4/CCL5/SRC/SYK/TGFB2	20
BP	GO:0060419	heart growth	11/153	112/18670	2.011E-09	4.51163E-08	2.08233E-08	MAPK14/ERBB4/FGFR1/FGFR2/IGF1/PPARA/MAPK1/RBP4/TGFB2/TGFBR1/TGFBR2	11
BP	GO:1990748	cellular detoxification	11/153	112/18670	2.011E-09	4.51163E-08	2.08233E-08	ALB/BMP7/CAT/DHFR/NQO1/GSTM1/GSTP1/NOS3/S100A9/SOD2/PRDX5	11
BP	GO:0006352	DNA-templated transcription, initiation	15/153	249/18670	2.13021E-09	4.73884E-08	2.18719E-08	AR/CDK7/ESR1/ESR2/NR3C1/PGR/PPARA/PPARG/RARA/RARB/RARG/RORA/RXRB/NR1H2/VDR	15
BP	GO:0046686	response to cadmium ion	9/153	63/18670	2.13523E-09	4.73884E-08	2.18719E-08	AKT1/CAT/EGFR/HMOX1/KIT/MMP9/MAPK1/MAPK8/AKR1C3	9
BP	GO:0051251	positive regulation of lymphocyte activation	17/153	334/18670	2.23929E-09	4.9432E-08	2.28151E-08	AKT1/RHOA/BTK/CDC42/DPP4/GRB2/IGF1/IL2/JAK3/PIK3R1/PTPN11/RAC1/RARA/CCL5/SRC/SYK/TGFBR2	17
BP	GO:0009408	response to heat	13/153	176/18670	2.26439E-09	4.97203E-08	2.29482E-08	AKT1/BAG1/FGF1/GSK3B/HMOX1/HSPA1A/HSPA8/HSP90AA1/HSP90AB1/IGF1/NOS3/PRKACA/MAPK1	13
BP	GO:0010828	positive regulation of glucose transmembrane transport	8/153	44/18670	2.33606E-09	5.10224E-08	2.35492E-08	AKT1/AKT2/BRAF/MAPK14/IGF1/INSR/PIK3R1/PTPN11	8
BP	GO:1901888	regulation of cell junction assembly	10/153	88/18670	2.65376E-09	5.76565E-08	2.66111E-08	ABL1/RHOA/ACE/EPHA2/KDR/PRKACA/PTK2/RAC1/SRC/TEK	10
BP	GO:0046660	female sex differentiation	11/153	115/18670	2.66995E-09	5.77046E-08	2.66333E-08	BCL2L1/CASP3/CTNNA1/CYP19A1/ESR1/INSR/KIT/NOS3/PGR/RBP4/SRC	11
BP	GO:0048511	rhythmic process	16/153	295/18670	2.75524E-09	5.92377E-08	2.7341E-08	CASP3/CSNK2A1/EGFR/ESR1/GSK3B/MMP7/NOS2/NOS3/PGR/PPARA/PPARG/MAPK8/RORA/SRC/TGFB2/TYMS	16
BP	GO:0051099	positive regulation of binding	13/153	179/18670	2.78379E-09	5.95413E-08	2.74811E-08	ABL1/PARP1/BMP2/ACE/GSK3B/HSP90AB1/IGF1/JAK2/LGALS3/MET/MMP9/PPARG/RARA	13
BP	GO:0032869	cellular response to insulin stimulus	14/153	216/18670	2.93311E-09	6.24117E-08	2.88059E-08	PARP1/AKT1/AKT2/GRB2/GSK3B/GSTP1/IGF1R/INSR/PIK3R1/PPARG/PTPN1/PTPN11/SRC/STAT1	14
BP	GO:0051249	regulation of lymphocyte activation	20/153	485/18670	3.02416E-09	6.40192E-08	2.95478E-08	ABL1/AKT1/RHOA/BTK/CASP3/CDC42/DPP4/GRB2/IGF1/IL2/JAK3/LGALS3/PIK3R1/PTPN11/RAC1/RARA/CCL5/SRC/SYK/TGFBR2	20
BP	GO:0060443	mammary gland morphogenesis	8/153	46/18670	3.39201E-09	7.144E-08	3.29729E-08	AR/EPHA2/ESR1/FGFR2/PGR/SRC/TGFBR2/VDR	8
BP	GO:0003007	heart morphogenesis	15/153	259/18670	3.6468E-09	7.64162E-08	3.52696E-08	BMP2/BMP7/EPHB4/FGFR2/INSR/MDM2/NOS3/PTK2/RARA/RARB/RBP4/TEK/TGFB2/TGFBR1/TGFBR2	15
BP	GO:0060038	cardiac muscle cell proliferation	9/153	67/18670	3.75157E-09	7.82146E-08	3.60997E-08	MAPK14/ERBB4/FGFR1/FGFR2/MAPK1/RBP4/TGFB2/TGFBR1/TGFBR2	9
BP	GO:0007173	epidermal growth factor receptor signaling pathway	11/153	119/18670	3.84695E-09	7.98E-08	3.68314E-08	ABL1/AKT1/CDC42/EGFR/GRB2/MMP9/PIK3R1/PTK2/PTPN11/SRC/ADAM17	11
BP	GO:0048638	regulation of developmental growth	17/153	347/18670	3.97669E-09	8.20789E-08	3.78832E-08	ABL1/AKT1/AR/MAPK14/ERBB4/FGFR1/FGFR2/GSK3B/IGF1/INSR/PPARA/MAPK1/PTK2/RBP4/REG1A/TGFBR1/TGFBR2	17
BP	GO:0050867	positive regulation of cell activation	18/153	394/18670	4.04614E-09	8.30968E-08	3.8353E-08	AKT1/RHOA/BTK/CDC42/DPP4/GRB2/IGF1/IL2/JAK2/JAK3/PIK3R1/PTPN11/RAC1/RARA/CCL5/SRC/SYK/TGFBR2	18
BP	GO:2000117	negative regulation of cysteine-type endopeptidase activity	10/153	92/18670	4.12263E-09	8.42487E-08	3.88847E-08	AKT1/XIAP/CSNK2A1/HGF/MDM2/MMP9/RAF1/SRC/PRDX5/BIRC7	10
BP	GO:0035272	exocrine system development	8/153	48/18670	4.83796E-09	9.83797E-08	4.54068E-08	BMP7/EGFR/FGFR1/FGFR2/HGF/INSR/TGFB2/TGM2	8
BP	GO:1903532	positive regulation of secretion by cell	18/153	399/18670	4.92826E-09	9.97248E-08	4.60276E-08	ABL1/CASP1/MAPK14/CYP19A1/EGFR/FGFR1/FGG/IGF1/IL2/JAK2/MMP12/PPIA/PTPN11/RAC1/RBP4/SRC/SYK/TGFB2	18
BP	GO:1903409	reactive oxygen species biosynthetic process	11/153	122/18670	5.01398E-09	1.00964E-07	4.65997E-08	AKT1/RHOA/NQO1/HSP90AA1/HSP90AB1/INSR/JAK2/NOS2/NOS3/RAC1/RORA	11
BP	GO:0002791	regulation of peptide secretion	20/153	500/18670	5.07364E-09	1.0167E-07	4.69254E-08	ABL1/ANXA5/CASP1/MAPK14/DPP4/EGFR/FGG/IGF1/IL2/JAK2/MMP12/NOS2/PPIA/PTPN11/RAC1/RBP4/CCL5/SRC/SYK/TGFB2	20
BP	GO:0010517	regulation of phospholipase activity	9/153	70/18670	5.58817E-09	1.11439E-07	5.14345E-08	ABL1/EGFR/ESR1/FGFR1/FGFR2/HRAS/ITK/KIT/CCL5	9
BP	GO:0050714	positive regulation of protein secretion	15/153	268/18670	5.79749E-09	1.15058E-07	5.31045E-08	ABL1/CASP1/MAPK14/EGFR/FGG/IGF1/IL2/JAK2/MMP12/PPIA/RAC1/RBP4/SRC/SYK/TGFB2	15
BP	GO:0010594	regulation of endothelial cell migration	14/153	229/18670	6.2226E-09	1.22696E-07	5.66299E-08	ABL1/AKT1/RHOA/EPHA2/FGF1/FGFR1/HMOX1/KDR/MET/NOS3/PPARG/PTK2/ADAM17/TEK	14
BP	GO:0008585	female gonad development	10/153	96/18670	6.27153E-09	1.22696E-07	5.66299E-08	BCL2L1/CASP3/CTNNA1/CYP19A1/ESR1/INSR/KIT/NOS3/PGR/SRC	10
BP	GO:0048010	vascular endothelial growth factor receptor signaling pathway	10/153	96/18670	6.27153E-09	1.22696E-07	5.66299E-08	RHOA/CDC42/MAPK14/HSP90AA1/KDR/PIK3R1/PTK2/PTPN1/RAC1/SRC	10
BP	GO:0007565	female pregnancy	13/153	192/18670	6.52127E-09	1.2698E-07	5.86072E-08	AKT1/AR/CTSB/ESR1/MMP2/MMP7/MMP9/PGR/MAPK1/RARA/TGFBR2/UMPS/VDR	13
BP	GO:0031098	stress-activated protein kinase signaling cascade	16/153	315/18670	7.02964E-09	1.36236E-07	6.28794E-08	AKT1/RHOA/BMP2/MAPK14/EGFR/GSTP1/HGF/HRAS/IGF1R/MAPK1/MAPK8/MAP2K1/PTPN1/SYK/TGFB2/BIRC7	16
BP	GO:0038034	signal transduction in absence of ligand	9/153	72/18670	7.21247E-09	1.38479E-07	6.39147E-08	AKT1/BCL2L1/CASP3/CTNNA1/FGFR1/GSK3B/HSPA1A/IL2/LCN2	9
BP	GO:0097192	extrinsic apoptotic signaling pathway in absence of ligand	9/153	72/18670	7.21247E-09	1.38479E-07	6.39147E-08	AKT1/BCL2L1/CASP3/CTNNA1/FGFR1/GSK3B/HSPA1A/IL2/LCN2	9
BP	GO:0042445	hormone metabolic process	14/153	232/18670	7.35033E-09	1.40473E-07	6.48348E-08	ADH1C/BMP2/CYP19A1/ACE/ESR1/FGFR1/HPN/HSD17B1/MME/PTPN11/RBP4/SULT1A1/VDR/AKR1C3	14
BP	GO:0060603	mammary gland duct morphogenesis	7/153	33/18670	7.72656E-09	1.46983E-07	6.78393E-08	AR/EPHA2/ESR1/FGFR2/PGR/SRC/VDR	7
BP	GO:0010038	response to metal ion	17/153	364/18670	8.11668E-09	1.53293E-07	7.07518E-08	PARP1/AKT1/ANXA5/BRAF/CA2/CASP3/CAT/NQO1/EGFR/FGG/HMOX1/KIT/MDM2/MMP9/MAPK1/MAPK8/AKR1C3	17
BP	GO:0006801	superoxide metabolic process	9/153	73/18670	8.16968E-09	1.53293E-07	7.07518E-08	BMP7/DHFR/NQO1/EGFR/GSTP1/NOS2/NOS3/SOD2/SYK	9
BP	GO:0031100	animal organ regeneration	9/153	73/18670	8.16968E-09	1.53293E-07	7.07518E-08	EGFR/GSTP1/HGF/HMOX1/PPARG/REG1A/AURKA/TGFBR2/TYMS	9
BP	GO:0003206	cardiac chamber morphogenesis	11/153	129/18670	9.05093E-09	1.6906E-07	7.80289E-08	BMP7/FGFR2/MDM2/NOS3/RARA/RARB/RBP4/TEK/TGFB2/TGFBR1/TGFBR2	11
BP	GO:0072132	mesenchyme morphogenesis	8/153	52/18670	9.38487E-09	1.74508E-07	8.05435E-08	BMP2/BMP7/FGFR1/MDM2/NOS3/TGFB2/TGFBR1/TGFBR2	8
BP	GO:0060485	mesenchyme development	15/153	278/18670	9.50294E-09	1.75911E-07	8.1191E-08	BMP2/BMP7/ERBB4/FGFR1/FGFR2/GSK3B/HGF/HPN/MDM2/NOS3/MAPK1/STAT1/TGFB2/TGFBR1/TGFBR2	15
BP	GO:0043254	regulation of protein complex assembly	19/153	467/18670	9.63387E-09	1.76504E-07	8.14648E-08	ABL1/PARP1/ALB/RHOA/CDC42/ESR1/GRB2/GSK3B/HSPA1A/HSPA8/HSP90AA1/MET/MMP1/MMP3/PTPN11/RAC1/RAF1/SRC/SYK	19
BP	GO:0007050	cell cycle arrest	14/153	237/18670	9.64905E-09	1.76504E-07	8.14648E-08	ABL1/AKT2/CDK2/CDK6/CDK7/FAP/HRAS/HSP90AB1/MDM2/PRKACA/MAP2K1/AURKA/TGFB2/TGFBR1	14
BP	GO:0007435	salivary gland morphogenesis	7/153	34/18670	9.66325E-09	1.76504E-07	8.14648E-08	BMP7/EGFR/FGFR1/FGFR2/HGF/TGFB2/TGM2	7
BP	GO:0046545	development of primary female sexual characteristics	10/153	101/18670	1.03154E-08	1.87586E-07	8.65798E-08	BCL2L1/CASP3/CTNNA1/CYP19A1/ESR1/INSR/KIT/NOS3/PGR/SRC	10
BP	GO:0098754	detoxification	11/153	131/18670	1.06439E-08	1.92711E-07	8.89449E-08	ALB/BMP7/CAT/DHFR/NQO1/GSTM1/GSTP1/NOS3/S100A9/SOD2/PRDX5	11
BP	GO:0051402	neuron apoptotic process	14/153	239/18670	1.07386E-08	1.93576E-07	8.93441E-08	PARP1/AKT2/APAF1/RHOA/BCL2L1/CASP3/NQO1/HMOX1/HRAS/HSP90AB1/JAK2/NQO2/SOD2/TGFB2	14
BP	GO:0098869	cellular oxidant detoxification	10/153	102/18670	1.13571E-08	2.03835E-07	9.40793E-08	ALB/BMP7/CAT/DHFR/NQO1/GSTP1/NOS3/S100A9/SOD2/PRDX5	10
BP	GO:0060411	cardiac septum morphogenesis	9/153	76/18670	1.17412E-08	2.09818E-07	9.68405E-08	BMP7/FGFR2/MDM2/NOS3/RARA/RARB/TGFB2/TGFBR1/TGFBR2	9
BP	GO:0003203	endocardial cushion morphogenesis	7/153	35/18670	1.19965E-08	2.13455E-07	9.85195E-08	BMP2/BMP7/MDM2/NOS3/TGFB2/TGFBR1/TGFBR2	7
BP	GO:0009266	response to temperature stimulus	14/153	243/18670	1.32595E-08	2.34915E-07	1.08424E-07	AKT1/BAG1/FGF1/GSK3B/HMOX1/HSPA1A/HSPA8/HSP90AA1/HSP90AB1/IGF1/NOS3/PPARG/PRKACA/MAPK1	14
BP	GO:0002573	myeloid leukocyte differentiation	13/153	204/18670	1.35187E-08	2.38483E-07	1.10071E-07	PARP1/CA2/CDC42/CDK6/MAPK14/EPHA2/KIT/MMP9/PIK3R1/PPARG/RARA/SRC/TGFBR2	13
BP	GO:0071887	leukocyte apoptotic process	10/153	104/18670	1.37234E-08	2.41064E-07	1.11262E-07	AKT1/BTK/CASP3/CTSL/IL2/JAK3/LGALS3/CCL5/ADAM17/BIRC7	10
BP	GO:0051403	stress-activated MAPK cascade	15/153	286/18670	1.39034E-08	2.43192E-07	1.12245E-07	AKT1/BMP2/MAPK14/EGFR/GSTP1/HGF/HRAS/IGF1R/MAPK1/MAPK8/MAP2K1/PTPN1/SYK/TGFB2/BIRC7	15
BP	GO:0051047	positive regulation of secretion	18/153	428/18670	1.46264E-08	2.54758E-07	1.17583E-07	ABL1/CASP1/MAPK14/CYP19A1/EGFR/FGFR1/FGG/IGF1/IL2/JAK2/MMP12/PPIA/PTPN11/RAC1/RBP4/SRC/SYK/TGFB2	18
BP	GO:0002793	positive regulation of peptide secretion	15/153	288/18670	1.52612E-08	2.64698E-07	1.2217E-07	ABL1/CASP1/MAPK14/EGFR/FGG/IGF1/IL2/JAK2/MMP12/PPIA/RAC1/RBP4/SRC/SYK/TGFB2	15
BP	GO:0002696	positive regulation of leukocyte activation	17/153	380/18670	1.53305E-08	2.64788E-07	1.22212E-07	AKT1/RHOA/BTK/CDC42/DPP4/GRB2/IGF1/IL2/JAK3/PIK3R1/PTPN11/RAC1/RARA/CCL5/SRC/SYK/TGFBR2	17
BP	GO:0002064	epithelial cell development	13/153	207/18670	1.60967E-08	2.76863E-07	1.27785E-07	AR/CDK6/EPHA2/ESR1/FGFR1/GSK3B/MET/PGR/RARA/RARB/RARG/ST14/TYMS	13
BP	GO:0042136	neurotransmitter biosynthetic process	10/153	106/18670	1.65157E-08	2.82891E-07	1.30567E-07	AKT1/NQO1/HSP90AA1/HSP90AB1/INSR/JAK2/NOS2/NOS3/RAC1/RORA	10
BP	GO:0031295	T cell costimulation	8/153	56/18670	1.72315E-08	2.93932E-07	1.35663E-07	AKT1/CDC42/DPP4/GRB2/PIK3R1/PTPN11/RAC1/SRC	8
BP	GO:0007431	salivary gland development	7/153	37/18670	1.8117E-08	3.06503E-07	1.41465E-07	BMP7/EGFR/FGFR1/FGFR2/HGF/TGFB2/TGM2	7
BP	GO:0071276	cellular response to cadmium ion	7/153	37/18670	1.8117E-08	3.06503E-07	1.41465E-07	AKT1/EGFR/HMOX1/MMP9/MAPK1/MAPK8/AKR1C3	7
BP	GO:0030324	lung development	12/153	172/18670	1.82286E-08	3.07133E-07	1.41756E-07	EGFR/EIF4E/FGF1/FGFR1/FGFR2/MME/NOS3/PGR/MAPK1/MAP2K1/RBP4/TGFBR2	12
BP	GO:0002433	immune response-regulating cell surface receptor signaling pathway involved in phagocytosis	11/153	139/18670	1.98171E-08	3.30018E-07	1.52319E-07	ABL1/CDC42/GRB2/HSP90AA1/HSP90AB1/PIK3R1/MAPK1/PTK2/RAC1/SRC/SYK	11
BP	GO:0038096	Fc-gamma receptor signaling pathway involved in phagocytosis	11/153	139/18670	1.98171E-08	3.30018E-07	1.52319E-07	ABL1/CDC42/GRB2/HSP90AA1/HSP90AB1/PIK3R1/MAPK1/PTK2/RAC1/SRC/SYK	11
BP	GO:0031294	lymphocyte costimulation	8/153	57/18670	1.99066E-08	3.30018E-07	1.52319E-07	AKT1/CDC42/DPP4/GRB2/PIK3R1/PTPN11/RAC1/SRC	8
BP	GO:0060043	regulation of cardiac muscle cell proliferation	8/153	57/18670	1.99066E-08	3.30018E-07	1.52319E-07	MAPK14/ERBB4/FGFR1/FGFR2/MAPK1/RBP4/TGFBR1/TGFBR2	8
BP	GO:0046326	positive regulation of glucose import	7/153	38/18670	2.20562E-08	3.64191E-07	1.68091E-07	AKT1/AKT2/MAPK14/IGF1/INSR/PIK3R1/PTPN11	7
BP	GO:0030323	respiratory tube development	12/153	176/18670	2.35699E-08	3.87636E-07	1.78912E-07	EGFR/EIF4E/FGF1/FGFR1/FGFR2/MME/NOS3/PGR/MAPK1/MAP2K1/RBP4/TGFBR2	12
BP	GO:0070661	leukocyte proliferation	15/153	298/18670	2.40465E-08	3.93905E-07	1.81805E-07	ABL1/BTK/CASP3/ACE/GSTP1/IGF1/IL2/IMPDH1/JAK3/KIT/LGALS3/PIK3CG/CCL5/SYK/TGFBR2	15
BP	GO:0038094	Fc-gamma receptor signaling pathway	11/153	142/18670	2.47602E-08	4.03992E-07	1.86461E-07	ABL1/CDC42/GRB2/HSP90AA1/HSP90AB1/PIK3R1/MAPK1/PTK2/RAC1/SRC/SYK	11
BP	GO:1904019	epithelial cell apoptotic process	10/153	111/18670	2.58065E-08	4.19407E-07	1.93576E-07	ABL1/BCL2L1/FGG/HMOX1/JAK2/KDR/PIK3CG/TEK/TGFBR2/AKR1C3	10
BP	GO:0010518	positive regulation of phospholipase activity	8/153	59/18670	2.63469E-08	4.2651E-07	1.96854E-07	EGFR/ESR1/FGFR1/FGFR2/HRAS/ITK/KIT/CCL5	8
BP	GO:0002065	columnar/cuboidal epithelial cell differentiation	10/153	112/18670	2.81394E-08	4.51482E-07	2.0838E-07	ABL1/BMP2/CDK6/FGFR1/FGFR2/GSK3B/RARA/RARB/RARG/TYMS	10
BP	GO:0060348	bone development	13/153	217/18670	2.82176E-08	4.51482E-07	2.0838E-07	RHOA/BMP2/FGFR2/IGF1/KIT/MMP13/PTPN11/RARA/RARB/RARG/SRC/TEK/TGFBR2	13
BP	GO:0071241	cellular response to inorganic substance	13/153	217/18670	2.82176E-08	4.51482E-07	2.0838E-07	PARP1/AKT1/ANXA5/BRAF/CDK2/NQO1/EGFR/HMOX1/MMP3/MMP9/MAPK1/MAPK8/AKR1C3	13
BP	GO:0010001	glial cell differentiation	13/153	218/18670	2.97975E-08	4.7492E-07	2.19197E-07	ABL1/AKT1/AKT2/RHOA/BMP2/CDK6/EGFR/F2/GSTP1/PPARG/MAPK1/MAP2K1/PTPN11	13
BP	GO:0002431	Fc receptor mediated stimulatory signaling pathway	11/153	145/18670	3.07732E-08	4.88584E-07	2.25504E-07	ABL1/CDC42/GRB2/HSP90AA1/HSP90AB1/PIK3R1/MAPK1/PTK2/RAC1/SRC/SYK	11
BP	GO:0048762	mesenchymal cell differentiation	13/153	219/18670	3.14568E-08	4.97523E-07	2.2963E-07	BMP2/BMP7/ERBB4/FGFR1/FGFR2/GSK3B/HGF/HPN/MAPK1/STAT1/TGFB2/TGFBR1/TGFBR2	13
BP	GO:0022408	negative regulation of cell-cell adhesion	12/153	181/18670	3.21988E-08	5.07316E-07	2.3415E-07	ABL1/AKT1/BMP2/CASP3/FGG/IL2/JAK2/JAK3/LGALS3/PLG/PPARA/PTK2	12
BP	GO:0042542	response to hydrogen peroxide	11/153	146/18670	3.30486E-08	5.1676E-07	2.38509E-07	ABL1/CASP3/CAT/NQO1/HGF/HMOX1/LCN2/MDM2/MET/SRC/STAT1	11
BP	GO:0045834	positive regulation of lipid metabolic process	11/153	146/18670	3.30486E-08	5.1676E-07	2.38509E-07	AKT1/AKT2/F2/FGF1/KIT/PPARA/PPARG/PTK2/SRC/TEK/NR1H2	11
BP	GO:0048645	animal organ formation	8/153	61/18670	3.45084E-08	5.3755E-07	2.48104E-07	AR/BMP7/FGF1/FGFR1/FGFR2/MAPK1/MAP2K1/TGFBR2	8
BP	GO:0008625	extrinsic apoptotic signaling pathway via death domain receptors	9/153	86/18670	3.53518E-08	5.48617E-07	2.53212E-07	BCL2L1/DAPK1/FGG/HGF/HMOX1/LGALS3/NOS3/PIK3R1/RAF1	9
BP	GO:0031589	cell-substrate adhesion	16/153	354/18670	3.61811E-08	5.59385E-07	2.58182E-07	ABL1/RHOA/CDC42/CDK6/FGG/GSK3B/JAK2/KDR/MMP12/PIK3R1/PLAU/PLG/PTK2/RAC1/SRC/TEK	16
BP	GO:0044706	multi-multicellular organism process	13/153	222/18670	3.69465E-08	5.69086E-07	2.62659E-07	AKT1/AR/CTSB/ESR1/MMP2/MMP7/MMP9/PGR/MAPK1/RARA/TGFBR2/UMPS/VDR	13
BP	GO:0035148	tube formation	11/153	148/18670	3.80536E-08	5.83959E-07	2.69524E-07	ABL1/APAF1/BMP7/CASP3/FGFR2/PRKACA/RARA/RARG/ST14/TGFB2/TGM2	11
BP	GO:0060444	branching involved in mammary gland duct morphogenesis	6/153	25/18670	4.2747E-08	6.53555E-07	3.01646E-07	AR/EPHA2/ESR1/PGR/SRC/VDR	6
BP	GO:0007160	cell-matrix adhesion	13/153	225/18670	4.32854E-08	6.59343E-07	3.04317E-07	ABL1/RHOA/CDK6/FGG/GSK3B/KDR/MMP12/PIK3R1/PLAU/PTK2/RAC1/SRC/TEK	13
BP	GO:0016331	morphogenesis of embryonic epithelium	11/153	150/18670	4.37221E-08	6.63548E-07	3.06258E-07	ABL1/APAF1/AR/BMP7/CASP3/FGFR2/PRKACA/RARA/RARG/ST14/TGFB2	11
BP	GO:0019216	regulation of lipid metabolic process	17/153	410/18670	4.64891E-08	7.02955E-07	3.24446E-07	AKT1/AKT2/BMP2/F2/FGF1/KIT/PIK3CG/PIK3R1/PPARA/PPARG/PTK2/RORA/SRC/TEK/NR1H2/VDR/AKR1C3	17
BP	GO:0031331	positive regulation of cellular catabolic process	16/153	361/18670	4.74498E-08	7.14864E-07	3.29943E-07	AKT1/AKT2/DAPK1/GSK3B/HMOX1/HSPA1A/HSP90AA1/IGF1/INSR/KDR/MDM2/PLK1/PPARA/PTK2/PTPN1/AURKA	16
BP	GO:0001819	positive regulation of cytokine production	18/153	464/18670	5.01133E-08	7.4977E-07	3.46053E-07	ABL1/CASP1/MAPK14/HGF/HMOX1/HRAS/HSPA1A/IL2/JAK2/MMP12/PIK3R1/PTPN11/RARA/RORA/SRC/STAT1/SYK/ADAM17	18
BP	GO:0016202	regulation of striated muscle tissue development	11/153	152/18670	5.01299E-08	7.4977E-07	3.46053E-07	BMP2/MAPK14/ERBB4/FGFR1/FGFR2/IGF1/PPARA/MAPK1/RBP4/TGFBR1/TGFBR2	11
BP	GO:0051054	positive regulation of DNA metabolic process	13/153	228/18670	5.05882E-08	7.53891E-07	3.47956E-07	PARP1/AKT1/CDK2/EGFR/FGFR1/HGF/HRAS/HSP90AA1/HSP90AB1/IL2/MAPK1/RAC1/SRC	13
BP	GO:0060135	maternal process involved in female pregnancy	8/153	64/18670	5.08024E-08	7.5436E-07	3.48172E-07	AKT1/AR/CTSB/ESR1/MMP7/PGR/MAPK1/VDR	8
BP	GO:0051346	negative regulation of hydrolase activity	18/153	466/18670	5.34754E-08	7.90757E-07	3.64971E-07	ABL1/AKT1/XIAP/CSNK2A1/GSK3B/HGF/HRAS/LGALS3/MDM2/MMP9/NOS3/SERPINA1/RAF1/SRC/TGFB2/TNK2/PRDX5/BIRC7	18
BP	GO:0062013	positive regulation of small molecule metabolic process	11/153	153/18670	5.36366E-08	7.90757E-07	3.64971E-07	AKT1/AKT2/FGF1/IGF1/INSR/NOS2/NOS3/PPARA/PPARG/SRC/NR1H2	11
BP	GO:0032102	negative regulation of response to external stimulus	16/153	365/18670	5.52445E-08	8.11563E-07	3.74574E-07	ANXA5/CYP19A1/F2/FAP/FGG/GSTP1/HGF/IGF1/IL2/NOS3/PLAU/PLG/PPARA/PPARG/RORA/TEK	16
BP	GO:1901861	regulation of muscle tissue development	11/153	155/18670	6.1311E-08	8.97488E-07	4.14232E-07	BMP2/MAPK14/ERBB4/FGFR1/FGFR2/IGF1/PPARA/MAPK1/RBP4/TGFBR1/TGFBR2	11
BP	GO:0003197	endocardial cushion development	7/153	44/18670	6.42739E-08	9.37535E-07	4.32716E-07	BMP2/BMP7/MDM2/NOS3/TGFB2/TGFBR1/TGFBR2	7
BP	GO:1901654	response to ketone	12/153	193/18670	6.54859E-08	9.48748E-07	4.37891E-07	PARP1/AKT1/AR/BCL2L1/EGFR/EIF4E/NR3C1/PPARG/SRC/TGFB2/TYMS/AKR1C3	12
BP	GO:0048634	regulation of muscle organ development	11/153	156/18670	6.55022E-08	9.48748E-07	4.37891E-07	BMP2/MAPK14/ERBB4/FGFR1/FGFR2/IGF1/PPARA/MAPK1/RBP4/TGFBR1/TGFBR2	11
BP	GO:0002429	immune response-activating cell surface receptor signaling pathway	18/153	473/18670	6.69403E-08	9.66187E-07	4.4594E-07	ABL1/BTK/CDC42/GRB2/HRAS/HSP90AA1/HSP90AB1/ICAM2/ITK/LGALS3/PIK3R1/PRKACA/MAPK1/PTK2/RAC1/RAF1/SRC/SYK	18
BP	GO:0033273	response to vitamin	9/153	93/18670	7.04282E-08	1.01299E-06	4.67541E-07	BMP7/CAT/EGFR/GSTP1/MDM2/PPARG/RARA/TYMS/VDR	9
BP	GO:0009896	positive regulation of catabolic process	17/153	423/18670	7.29368E-08	1.04543E-06	4.82513E-07	AKT1/AKT2/CSNK2A1/DAPK1/GSK3B/HMOX1/HSPA1A/HSP90AA1/IGF1/INSR/KDR/MDM2/PLK1/PPARA/PTK2/PTPN1/AURKA	17
BP	GO:0001701	in utero embryonic development	16/153	373/18670	7.44395E-08	1.0621E-06	4.90208E-07	AKT1/AR/BCL2L1/BMP2/BMP7/EGFR/FGFR1/FGFR2/GRB2/IGF1/NOS3/MAPK1/MAP2K1/ST14/TGFBR1/TGFBR2	16
BP	GO:0008637	apoptotic mitochondrial changes	10/153	124/18670	7.46145E-08	1.0621E-06	4.90208E-07	AKT1/BCL2L1/ERBB4/GSK3B/HGF/HSPA1A/IGF1/MMP9/MAPK8/SOD2	10
BP	GO:1900274	regulation of phospholipase C activity	7/153	45/18670	7.5594E-08	1.07234E-06	4.94936E-07	ABL1/EGFR/ESR1/FGFR1/HRAS/ITK/KIT	7
BP	GO:0032872	regulation of stress-activated MAPK cascade	13/153	237/18670	7.9632E-08	1.12576E-06	5.19589E-07	AKT1/BMP2/EGFR/GSTP1/HGF/HRAS/IGF1R/MAPK1/MAP2K1/PTPN1/SYK/TGFB2/BIRC7	13
BP	GO:0070302	regulation of stress-activated protein kinase signaling cascade	13/153	239/18670	8.78384E-08	1.23753E-06	5.71179E-07	AKT1/BMP2/EGFR/GSTP1/HGF/HRAS/IGF1R/MAPK1/MAP2K1/PTPN1/SYK/TGFB2/BIRC7	13
BP	GO:0002067	glandular epithelial cell differentiation	7/153	46/18670	8.85533E-08	1.23915E-06	5.71923E-07	BMP2/CDK6/FGFR2/GSK3B/RARA/RARB/RARG	7
BP	GO:0060711	labyrinthine layer development	7/153	46/18670	8.85533E-08	1.23915E-06	5.71923E-07	AKT1/BMP7/FGFR2/GRB2/MAPK1/MAP2K1/ST14	7
BP	GO:0042698	ovulation cycle	8/153	69/18670	9.27098E-08	1.29293E-06	5.96745E-07	CASP3/EGFR/ESR1/MMP7/NOS3/PGR/SRC/TGFB2	8
BP	GO:0031647	regulation of protein stability	14/153	284/18670	9.33448E-08	1.2974E-06	5.9881E-07	BMP2/CASP3/CDK7/HSPA1A/HSPA8/HSP90AA1/HSP90AB1/IGF1/MDM2/PIK3R1/PLK1/MAPK1/SRC/AURKA	14
BP	GO:0051090	regulation of DNA-binding transcription factor activity	17/153	432/18670	9.86457E-08	1.36647E-06	6.30691E-07	AKT1/AR/BMP7/BTK/CAT/MAPK14/ESR1/ESR2/HMOX1/HSPA1A/JAK2/KIT/PPARG/MAPK1/MAPK8/S100A9/SYK	17
BP	GO:0045089	positive regulation of innate immune response	16/153	381/18670	9.95367E-08	1.37421E-06	6.3426E-07	XIAP/BTK/CTSB/CTSL/ESR1/FGG/HRAS/HSPA1A/ICAM2/MMP12/PRKACA/RAF1/S100A9/CCL5/SRC/SYK	16
BP	GO:0002576	platelet degranulation	10/153	128/18670	1.00871E-07	1.38338E-06	6.38493E-07	ALB/ALDOA/ANXA5/FGG/HGF/IGF1/SERPINA1/PLG/SYK/TGFB2	10
BP	GO:0010595	positive regulation of endothelial cell migration	10/153	128/18670	1.00871E-07	1.38338E-06	6.38493E-07	ABL1/AKT1/FGF1/FGFR1/HMOX1/KDR/MET/NOS3/ADAM17/TEK	10
BP	GO:0014020	primary neural tube formation	9/153	97/18670	1.01775E-07	1.39115E-06	6.42081E-07	ABL1/APAF1/BMP7/CASP3/PRKACA/RARA/RARG/ST14/TGFB2	9
BP	GO:0045931	positive regulation of mitotic cell cycle	11/153	163/18670	1.02697E-07	1.39912E-06	6.4576E-07	ABL1/AKT1/EGFR/EIF4E/FGFR1/IGF1/INSR/MDM2/PTPN11/AURKA/ADAM17	11
BP	GO:0061383	trabecula morphogenesis	7/153	47/18670	1.0334E-07	1.40325E-06	6.47663E-07	RHOA/BMP7/MMP2/RBP4/TEK/TGFB2/TGFBR1	7
BP	GO:0030850	prostate gland development	7/153	48/18670	1.20157E-07	1.61849E-06	7.47009E-07	AR/BMP7/CYP19A1/ESR1/FGFR2/RARA/RARG	7
BP	GO:0060324	face development	7/153	48/18670	1.20157E-07	1.61849E-06	7.47009E-07	MMP2/MAPK1/MAP2K1/PTPN11/RAF1/RARA/RARG	7
BP	GO:0034330	cell junction organization	14/153	290/18670	1.2076E-07	1.61849E-06	7.47009E-07	ABL1/RHOA/CDC42/CTNNA1/ACE/EPHA2/KDR/PRKACA/PTK2/RAC1/SRC/TEK/TGFB2/TGFBR1	14
BP	GO:0042063	gliogenesis	14/153	290/18670	1.2076E-07	1.61849E-06	7.47009E-07	ABL1/AKT1/AKT2/RHOA/BMP2/CDK6/EGFR/F2/GSTP1/PPARG/MAPK1/MAP2K1/PTPN11/TGFB2	14
BP	GO:0030518	intracellular steroid hormone receptor signaling pathway	10/153	132/18670	1.34942E-07	1.79691E-06	8.29356E-07	PARP1/AR/RHOA/CDK7/ESR1/ESR2/NR3C1/JAK2/PGR/SRC	10
BP	GO:0072175	epithelial tube formation	10/153	132/18670	1.34942E-07	1.79691E-06	8.29356E-07	ABL1/APAF1/BMP7/CASP3/FGFR2/PRKACA/RARA/RARG/ST14/TGFB2	10
BP	GO:0014706	striated muscle tissue development	16/153	390/18670	1.36812E-07	1.81595E-06	8.38146E-07	RHOA/BMP2/BMP7/MAPK14/ERBB4/FGFR1/FGFR2/IGF1/PPARA/MAPK1/RARA/RARB/RBP4/TGFB2/TGFBR1/TGFBR2	16
BP	GO:0048012	hepatocyte growth factor receptor signaling pathway	5/153	16/18670	1.40584E-07	1.86003E-06	8.5849E-07	HGF/HPN/MET/PTPN1/RAC1	5
BP	GO:0071560	cellular response to transforming growth factor beta stimulus	13/153	249/18670	1.41437E-07	1.86534E-06	8.60942E-07	PARP1/APAF1/RHOA/FGFR2/NR3C1/HSPA1A/HSP90AB1/PTK2/SRC/ADAM17/TGFB2/TGFBR1/TGFBR2	13
BP	GO:0046632	alpha-beta T cell differentiation	9/153	101/18670	1.44639E-07	1.90149E-06	8.77626E-07	ABL1/RHOA/IL2/ITK/JAK3/RARA/RORA/SYK/TGFBR2	9
BP	GO:0051701	interaction with host	12/153	209/18670	1.56446E-07	2.0437E-06	9.43261E-07	BCL2L1/CTSB/DPP4/EGFR/EPHA2/GRB2/HSPA1A/INSR/MET/PPIA/SRC/TYMS	12
BP	GO:0071229	cellular response to acid chemical	12/153	209/18670	1.56446E-07	2.0437E-06	9.43261E-07	AKT1/BCL2L1/EGFR/FGFR2/KDR/MMP2/PPARG/RARA/RARB/RARG/SRC/AKR1C3	12
BP	GO:1900182	positive regulation of protein localization to nucleus	8/153	74/18670	1.61432E-07	2.10219E-06	9.70256E-07	PARP1/AKT1/MAPK14/F2/PIK3R1/PLK1/MAPK1/SRC	8
BP	GO:0043523	regulation of neuron apoptotic process	12/153	210/18670	1.64769E-07	2.13889E-06	9.87197E-07	PARP1/RHOA/BCL2L1/CASP3/NQO1/HMOX1/HRAS/HSP90AB1/JAK2/NQO2/SOD2/TGFB2	12
BP	GO:0001889	liver development	10/153	135/18670	1.66766E-07	2.15721E-06	9.95654E-07	EGFR/HGF/HMOX1/HPN/MET/RARA/RARB/REG1A/AURKA/TYMS	10
BP	GO:0003205	cardiac chamber development	11/153	171/18670	1.67226E-07	2.15721E-06	9.95654E-07	BMP7/FGFR2/MDM2/NOS3/RARA/RARB/RBP4/TEK/TGFB2/TGFBR1/TGFBR2	11
BP	GO:0002758	innate immune response-activating signal transduction	14/153	298/18670	1.68581E-07	2.16791E-06	1.00059E-06	XIAP/BTK/CTSB/CTSL/ESR1/FGG/HRAS/HSPA1A/ICAM2/PRKACA/RAF1/S100A9/SRC/SYK	14
BP	GO:0071559	response to transforming growth factor beta	13/153	255/18670	1.86227E-07	2.38741E-06	1.1019E-06	PARP1/APAF1/RHOA/FGFR2/NR3C1/HSPA1A/HSP90AB1/PTK2/SRC/ADAM17/TGFB2/TGFBR1/TGFBR2	13
BP	GO:0007178	transmembrane receptor protein serine/threonine kinase signaling pathway	15/153	349/18670	1.89758E-07	2.42514E-06	1.11931E-06	ABL1/PARP1/XIAP/RHOA/BMP2/BMP7/MAPK14/HSPA1A/HSP90AB1/PTK2/SRC/ADAM17/TGFB2/TGFBR1/TGFBR2	15
BP	GO:0034605	cellular response to heat	10/153	137/18670	1.91483E-07	2.43964E-06	1.12601E-06	BAG1/FGF1/GSK3B/HMOX1/HSPA1A/HSPA8/HSP90AA1/HSP90AB1/PRKACA/MAPK1	10
BP	GO:0001841	neural tube formation	9/153	105/18670	2.02424E-07	2.57109E-06	1.18668E-06	ABL1/APAF1/BMP7/CASP3/PRKACA/RARA/RARG/ST14/TGFB2	9
BP	GO:0008584	male gonad development	10/153	138/18670	2.05007E-07	2.58798E-06	1.19447E-06	AR/BCL2L1/CTNNA1/ESR1/INSR/KIT/RARA/TGFB2/TGFBR1/AKR1C3	10
BP	GO:0061008	hepaticobiliary system development	10/153	138/18670	2.05007E-07	2.58798E-06	1.19447E-06	EGFR/HGF/HMOX1/HPN/MET/RARA/RARB/REG1A/AURKA/TYMS	10
BP	GO:0038128	ERBB2 signaling pathway	6/153	32/18670	2.08621E-07	2.62558E-06	1.21183E-06	EGFR/ERBB4/GRB2/HSP90AA1/PIK3R1/SRC	6
BP	GO:0046546	development of primary male sexual characteristics	10/153	139/18670	2.19363E-07	2.75237E-06	1.27035E-06	AR/BCL2L1/CTNNA1/ESR1/INSR/KIT/RARA/TGFB2/TGFBR1/AKR1C3	10
BP	GO:0030195	negative regulation of blood coagulation	7/153	53/18670	2.43081E-07	3.04072E-06	1.40343E-06	ANXA5/F2/FAP/FGG/NOS3/PLAU/PLG	7
BP	GO:0010827	regulation of glucose transmembrane transport	8/153	78/18670	2.44295E-07	3.04668E-06	1.40618E-06	AKT1/AKT2/BRAF/MAPK14/IGF1/INSR/PIK3R1/PTPN11	8
BP	GO:0008286	insulin receptor signaling pathway	10/153	141/18670	2.50747E-07	3.10835E-06	1.43465E-06	AKT1/AKT2/GRB2/GSK3B/IGF1R/INSR/PIK3R1/PTPN1/PTPN11/SRC	10
BP	GO:0009411	response to UV	10/153	141/18670	2.50747E-07	3.10835E-06	1.43465E-06	PARP1/AKT1/CASP3/CAT/CHEK1/EGFR/MDM2/MME/PIK3R1/MAPK8	10
BP	GO:0060537	muscle tissue development	16/153	408/18670	2.5178E-07	3.11182E-06	1.43625E-06	RHOA/BMP2/BMP7/MAPK14/ERBB4/FGFR1/FGFR2/IGF1/PPARA/MAPK1/RARA/RARB/RBP4/TGFB2/TGFBR1/TGFBR2	16
BP	GO:0034504	protein localization to nucleus	13/153	262/18670	2.54273E-07	3.13325E-06	1.44614E-06	PARP1/AKT1/BMP7/MAPK14/F2/GSK3B/MDM2/MMP12/PIK3R1/PLK1/MAPK1/SRC/SYK	13
BP	GO:1903034	regulation of response to wounding	11/153	179/18670	2.65417E-07	3.26084E-06	1.50503E-06	ANXA5/F2/FAP/FGG/HRAS/NOS3/PLAU/PLG/MAP2K1/SYK/TGFBR2	11
BP	GO:0030193	regulation of blood coagulation	8/153	79/18670	2.6995E-07	3.2969E-06	1.52167E-06	ANXA5/F2/FAP/FGG/NOS3/PLAU/PLG/SYK	8
BP	GO:0071260	cellular response to mechanical stimulus	8/153	79/18670	2.6995E-07	3.2969E-06	1.52167E-06	AKT1/CASP1/CHEK1/EGFR/MMP7/MAPK8/PTPN11/RAC1	8
BP	GO:1900047	negative regulation of hemostasis	7/153	54/18670	2.77379E-07	3.37764E-06	1.55894E-06	ANXA5/F2/FAP/FGG/NOS3/PLAU/PLG	7
BP	GO:0043534	blood vessel endothelial cell migration	11/153	180/18670	2.80722E-07	3.3983E-06	1.56847E-06	ABL1/AKT1/RHOA/EPHA2/EPHB4/FGFR1/HMOX1/KDR/NOS3/PPARG/ADAM17	11
BP	GO:1905330	regulation of morphogenesis of an epithelium	11/153	180/18670	2.80722E-07	3.3983E-06	1.56847E-06	ABL1/AR/RHOA/BMP7/CDC42/ESR1/FGF1/FGFR1/HGF/RAC1/STAT1	11
BP	GO:0034612	response to tumor necrosis factor	14/153	312/18670	2.94761E-07	3.54745E-06	1.63731E-06	AKT1/CASP1/CASP3/MAPK14/GSTP1/HSPA1A/JAK2/LCN2/MAPK1/RORA/CCL5/STAT1/SYK/ADAM17	14
BP	GO:0046879	hormone secretion	14/153	312/18670	2.94761E-07	3.54745E-06	1.63731E-06	ANXA5/BTK/CYP19A1/DPP4/EGFR/FGFR1/FGG/JAK2/NOS2/PTPN11/RAC1/RAF1/RBP4/CCL5	14
BP	GO:1900046	regulation of hemostasis	8/153	80/18670	2.97879E-07	3.57455E-06	1.64982E-06	ANXA5/F2/FAP/FGG/NOS3/PLAU/PLG/SYK	8
BP	GO:0007409	axonogenesis	17/153	468/18670	3.06618E-07	3.66875E-06	1.6933E-06	ABL1/RHOA/BMP7/EPHA2/EPHB4/FGFR2/GRB2/GSK3B/HSP90AA1/HSP90AB1/PIK3R1/MAPK1/MAP2K1/PTK2/PTPN11/RAC1/SRC	17
BP	GO:0048708	astrocyte differentiation	8/153	81/18670	3.28248E-07	3.91621E-06	1.80751E-06	ABL1/BMP2/CDK6/EGFR/F2/MAPK1/MAP2K1/PTPN11	8
BP	GO:0031334	positive regulation of protein complex assembly	13/153	268/18670	3.29505E-07	3.91988E-06	1.8092E-06	PARP1/RHOA/ESR1/GRB2/GSK3B/HSPA1A/HSP90AA1/MET/MMP1/MMP3/RAC1/SRC/SYK	13
BP	GO:0003279	cardiac septum development	9/153	112/18670	3.52543E-07	4.18189E-06	1.93014E-06	BMP7/FGFR2/MDM2/NOS3/RARA/RARB/TGFB2/TGFBR1/TGFBR2	9
BP	GO:0060688	regulation of morphogenesis of a branching structure	7/153	56/18670	3.58294E-07	4.23792E-06	1.956E-06	ABL1/AR/BMP7/ESR1/FGFR1/FGFR2/HGF	7
BP	GO:0060438	trachea development	5/153	19/18670	3.66889E-07	4.32719E-06	1.9972E-06	MAPK1/MAP2K1/RARA/RARG/TGFBR2	5
BP	GO:0002262	myeloid cell homeostasis	10/153	147/18670	3.69789E-07	4.34897E-06	2.00725E-06	CASP3/CDK6/MAPK14/HMOX1/HSPA1A/JAK2/JAK3/KIT/STAT1/ADAM17	10
BP	GO:1903706	regulation of hemopoiesis	17/153	475/18670	3.77457E-07	4.42654E-06	2.04305E-06	ABL1/RHOA/BTK/CA2/CDK6/MAPK14/ACE/HSPA1A/IL2/JAK3/LGALS3/PIK3R1/RARA/RARG/STAT1/SYK/TGFBR2	17
BP	GO:0002218	activation of innate immune response	14/153	319/18670	3.85418E-07	4.5071E-06	2.08023E-06	XIAP/BTK/CTSB/CTSL/ESR1/FGG/HRAS/HSPA1A/ICAM2/PRKACA/RAF1/S100A9/SRC/SYK	14
BP	GO:0006909	phagocytosis	15/153	369/18670	3.86954E-07	4.51227E-06	2.08262E-06	ABL1/CDC42/GRB2/HSP90AA1/HSP90AB1/MET/PIK3R1/PPARG/MAPK1/PTK2/RAC1/RARA/SRC/SYK/TGM2	15
BP	GO:0061041	regulation of wound healing	10/153	148/18670	3.93827E-07	4.57949E-06	2.11365E-06	ANXA5/F2/FAP/FGG/HRAS/NOS3/PLAU/PLG/SYK/TGFBR2	10
BP	GO:1901342	regulation of vasculature development	16/153	422/18670	3.95603E-07	4.58721E-06	2.11721E-06	ABL1/RHOA/BMP7/EPHA2/FGF1/HGF/HMOX1/KDR/KIT/NOS3/PPARG/SOD2/STAT1/TEK/TGFB2/TGFBR2	16
BP	GO:0002066	columnar/cuboidal epithelial cell development	7/153	57/18670	4.05668E-07	4.67764E-06	2.15895E-06	CDK6/FGFR1/GSK3B/RARA/RARB/RARG/TYMS	7
BP	GO:0050819	negative regulation of coagulation	7/153	57/18670	4.05668E-07	4.67764E-06	2.15895E-06	ANXA5/F2/FAP/FGG/NOS3/PLAU/PLG	7
BP	GO:2000058	regulation of ubiquitin-dependent protein catabolic process	10/153	149/18670	4.19225E-07	4.8205E-06	2.22489E-06	AKT1/CSNK2A1/FHIT/GSK3B/HSPA1A/HSP90AB1/MDM2/PLK1/PTK2/AURKA	10
BP	GO:0032943	mononuclear cell proliferation	13/153	274/18670	4.24092E-07	4.86292E-06	2.24446E-06	ABL1/BTK/CASP3/ACE/IGF1/IL2/IMPDH1/JAK3/LGALS3/PIK3CG/CCL5/SYK/TGFBR2	13
BP	GO:0009914	hormone transport	14/153	322/18670	4.31421E-07	4.93326E-06	2.27693E-06	ANXA5/BTK/CYP19A1/DPP4/EGFR/FGFR1/FGG/JAK2/NOS2/PTPN11/RAC1/RAF1/RBP4/CCL5	14
BP	GO:0050818	regulation of coagulation	8/153	84/18670	4.35779E-07	4.96932E-06	2.29357E-06	ANXA5/F2/FAP/FGG/NOS3/PLAU/PLG/SYK	8
BP	GO:1904375	regulation of protein localization to cell periphery	9/153	115/18670	4.41886E-07	5.02508E-06	2.31931E-06	AKT1/AR/BCL2L1/EGFR/EPHA2/HRAS/LGALS3/PIK3R1/PLK1	9
BP	GO:1902041	regulation of extrinsic apoptotic signaling pathway via death domain receptors	7/153	58/18670	4.582E-07	5.19629E-06	2.39833E-06	BCL2L1/FGG/HGF/HMOX1/LGALS3/NOS3/RAF1	7
BP	GO:1900180	regulation of protein localization to nucleus	9/153	116/18670	4.75736E-07	5.38038E-06	2.48329E-06	PARP1/AKT1/MAPK14/F2/GSK3B/PIK3R1/PLK1/MAPK1/SRC	9
BP	GO:0071248	cellular response to metal ion	11/153	190/18670	4.82449E-07	5.44139E-06	2.51145E-06	PARP1/AKT1/ANXA5/BRAF/NQO1/EGFR/HMOX1/MMP9/MAPK1/MAPK8/AKR1C3	11
BP	GO:0051052	regulation of DNA metabolic process	16/153	429/18670	4.92455E-07	5.53911E-06	2.55656E-06	PARP1/AKT1/APAF1/CDK2/CHEK1/EGFR/FGFR1/HGF/HRAS/HSP90AA1/HSP90AB1/IL2/PPARG/MAPK1/RAC1/SRC	16
BP	GO:0001935	endothelial cell proliferation	11/153	191/18670	5.08364E-07	5.70252E-06	2.63198E-06	AKT1/BMP2/EPHA2/FGFR1/HMOX1/KDR/PPARG/STAT1/ADAM17/TEK/TGFBR1	11
BP	GO:0030168	platelet activation	10/153	153/18670	5.35746E-07	5.97719E-06	2.75875E-06	F2/FGG/NOS3/PIK3CG/PIK3R1/MAPK1/PTPN11/RAF1/SRC/SYK	10
BP	GO:0042133	neurotransmitter metabolic process	10/153	153/18670	5.35746E-07	5.97719E-06	2.75875E-06	AKT1/NQO1/HSP90AA1/HSP90AB1/INSR/JAK2/NOS2/NOS3/RAC1/RORA	10
BP	GO:0016485	protein processing	14/153	328/18670	5.38517E-07	5.99191E-06	2.76554E-06	PARP1/XIAP/CASP1/CASP3/ACE/F2/FGG/HPN/MDM2/MME/PLAU/PRKACA/SRC/BIRC7	14
BP	GO:0007219	Notch signaling pathway	11/153	193/18670	5.63908E-07	6.25756E-06	2.88815E-06	AKT1/BMP2/BMP7/CDK6/EGFR/KIT/NOS3/STAT1/ADAM17/TGFB2/TGFBR2	11
BP	GO:0001892	embryonic placenta development	8/153	87/18670	5.72125E-07	6.33172E-06	2.92238E-06	AKT1/BMP7/EGFR/FGFR2/GRB2/MAPK1/MAP2K1/ST14	8
BP	GO:0046324	regulation of glucose import	7/153	60/18670	5.80542E-07	6.37361E-06	2.94171E-06	AKT1/AKT2/MAPK14/IGF1/INSR/PIK3R1/PTPN11	7
BP	GO:0051893	regulation of focal adhesion assembly	7/153	60/18670	5.80542E-07	6.37361E-06	2.94171E-06	ABL1/RHOA/KDR/PTK2/RAC1/SRC/TEK	7
BP	GO:0090109	regulation of cell-substrate junction assembly	7/153	60/18670	5.80542E-07	6.37361E-06	2.94171E-06	ABL1/RHOA/KDR/PTK2/RAC1/SRC/TEK	7
BP	GO:0048009	insulin-like growth factor receptor signaling pathway	6/153	38/18670	6.10314E-07	6.66501E-06	3.07621E-06	AKT1/AR/BMP2/IGF1/IGF1R/PIK3R1	6
BP	GO:0060416	response to growth hormone	6/153	38/18670	6.10314E-07	6.66501E-06	3.07621E-06	AKT1/JAK2/JAK3/PIK3R1/PTK2/PTPN1	6
BP	GO:0031346	positive regulation of cell projection organization	15/153	383/18670	6.19854E-07	6.75134E-06	3.11606E-06	RHOA/BMP7/CDC42/FGFR1/HGF/HRAS/IL2/KIT/LCN2/MAP2K1/RAC1/REG1A/S100A9/SRC/TGFBR1	15
BP	GO:1900407	regulation of cellular response to oxidative stress	8/153	88/18670	6.25005E-07	6.78953E-06	3.13368E-06	PARP1/AKT1/BMP7/DHFR/HGF/MET/MMP3/SOD2	8
BP	GO:0021700	developmental maturation	13/153	284/18670	6.36635E-07	6.89771E-06	3.18361E-06	RHOA/BMP2/BTK/FGFR1/FGG/IGF1/MMP2/PGR/PPARG/PRKACA/AURKA/TGFB2/TYMS	13
BP	GO:0007259	JAK-STAT cascade	10/153	156/18670	6.4086E-07	6.90723E-06	3.18801E-06	ERBB4/F2/IGF1/IL2/JAK2/JAK3/KIT/PTPN1/CCL5/STAT1	10
BP	GO:0043535	regulation of blood vessel endothelial cell migration	10/153	156/18670	6.4086E-07	6.90723E-06	3.18801E-06	ABL1/AKT1/RHOA/EPHA2/FGFR1/HMOX1/KDR/NOS3/PPARG/ADAM17	10
BP	GO:0031348	negative regulation of defense response	12/153	239/18670	6.60621E-07	7.07816E-06	3.2669E-06	CYP19A1/F2/GSTP1/HGF/IGF1/IL2/MMP12/PPARA/PPARG/RORA/TEK/NR1H2	12
BP	GO:0048705	skeletal system morphogenesis	12/153	239/18670	6.60621E-07	7.07816E-06	3.2669E-06	BMP7/MAPK14/FGFR1/FGFR2/MMP2/MMP13/RARA/RARB/RARG/TEK/TGFBR1/TGFBR2	12
BP	GO:0042692	muscle cell differentiation	15/153	385/18670	6.61863E-07	7.07816E-06	3.2669E-06	ABL1/AKT1/BMP2/CASP3/CDC42/MAPK14/CTNNA1/FGFR2/IGF1/KIT/PPARA/RARA/RARB/RORA/SOD2	15
BP	GO:0010811	positive regulation of cell-substrate adhesion	9/153	121/18670	6.80887E-07	7.26279E-06	3.35211E-06	ABL1/CDC42/CDK6/FGG/GSK3B/JAK2/KDR/RAC1/TEK	9
BP	GO:0006914	autophagy	17/153	496/18670	6.88488E-07	7.30611E-06	3.37211E-06	ABL1/AKT1/CASP3/CSNK2A1/DAPK1/GSK3B/HGF/HMOX1/HSPA8/HSP90AA1/KDR/MET/PRKACA/MAPK8/PTK2/S100A9/SRC	17
BP	GO:0061919	process utilizing autophagic mechanism	17/153	496/18670	6.88488E-07	7.30611E-06	3.37211E-06	ABL1/AKT1/CASP3/CSNK2A1/DAPK1/GSK3B/HGF/HMOX1/HSPA8/HSP90AA1/KDR/MET/PRKACA/MAPK8/PTK2/S100A9/SRC	17
BP	GO:0030217	T cell differentiation	12/153	240/18670	6.90536E-07	7.30906E-06	3.37347E-06	ABL1/RHOA/CDK6/IL2/ITK/JAK3/KIT/RARA/RORA/SYK/ADAM17/TGFBR2	12
BP	GO:1902042	negative regulation of extrinsic apoptotic signaling pathway via death domain receptors	6/153	39/18670	7.16426E-07	7.5637E-06	3.491E-06	BCL2L1/FGG/HGF/HMOX1/NOS3/RAF1	6
BP	GO:0034329	cell junction assembly	12/153	241/18670	7.21649E-07	7.59941E-06	3.50748E-06	ABL1/RHOA/CDC42/CTNNA1/ACE/EPHA2/KDR/PRKACA/PTK2/RAC1/SRC/TEK	12
BP	GO:0034101	erythrocyte homeostasis	9/153	122/18670	7.30027E-07	7.66807E-06	3.53917E-06	CASP3/CDK6/MAPK14/HMOX1/HSPA1A/JAK2/JAK3/KIT/STAT1	9
BP	GO:0001843	neural tube closure	8/153	90/18670	7.43394E-07	7.78865E-06	3.59482E-06	ABL1/APAF1/CASP3/PRKACA/RARA/RARG/ST14/TGFB2	8
BP	GO:0021915	neural tube development	10/153	160/18670	8.08839E-07	8.41652E-06	3.88461E-06	ABL1/APAF1/BMP7/CASP3/EPHA2/PRKACA/RARA/RARG/ST14/TGFB2	10
BP	GO:0046661	male sex differentiation	10/153	160/18670	8.08839E-07	8.41652E-06	3.88461E-06	AR/BCL2L1/CTNNA1/ESR1/INSR/KIT/RARA/TGFB2/TGFBR1/AKR1C3	10
BP	GO:0060606	tube closure	8/153	91/18670	8.09437E-07	8.41652E-06	3.88461E-06	ABL1/APAF1/CASP3/PRKACA/RARA/RARG/ST14/TGFB2	8
BP	GO:0060065	uterus development	5/153	22/18670	8.14569E-07	8.42948E-06	3.8906E-06	CYP19A1/ESR1/RBP4/SRC/TGFB2	5
BP	GO:0046622	positive regulation of organ growth	7/153	63/18670	8.14768E-07	8.42948E-06	3.8906E-06	AKT1/MAPK14/ERBB4/FGFR1/FGFR2/IGF1/MAPK1	7
BP	GO:0071356	cellular response to tumor necrosis factor	13/153	291/18670	8.37545E-07	8.62231E-06	3.97959E-06	AKT1/CASP1/MAPK14/GSTP1/HSPA1A/JAK2/LCN2/MAPK1/RORA/CCL5/STAT1/SYK/ADAM17	13
BP	GO:0001838	embryonic epithelial tube formation	9/153	124/18670	8.37584E-07	8.62231E-06	3.97959E-06	ABL1/APAF1/BMP7/CASP3/PRKACA/RARA/RARG/ST14/TGFB2	9
BP	GO:0009314	response to radiation	16/153	448/18670	8.72999E-07	8.96452E-06	4.13754E-06	PARP1/AKT1/AKT2/BCL2L1/CASP3/CAT/CHEK1/MAPK14/EGFR/GRB2/HRAS/KIT/MDM2/MME/PIK3R1/MAPK8	16
BP	GO:0045471	response to ethanol	9/153	125/18670	8.9632E-07	9.18116E-06	4.23753E-06	RHOA/CAT/NQO1/FGFR2/GSTP1/IL2/RARA/RBP4/TYMS	9
BP	GO:0031960	response to corticosteroid	10/153	162/18670	9.06407E-07	9.26151E-06	4.27461E-06	PARP1/RHOA/CASP3/EGFR/EIF4E/NR3C1/GSTP1/SRC/TYMS/AKR1C3	10
BP	GO:0030278	regulation of ossification	11/153	203/18670	9.29997E-07	9.47908E-06	4.37504E-06	BMP2/BMP7/CDK6/MAPK14/FGFR2/HGF/IGF1/PRKACA/MAPK1/PTK2/TGFB2	11
BP	GO:1903362	regulation of cellular protein catabolic process	12/153	247/18670	9.35873E-07	9.51548E-06	4.39183E-06	AKT1/CSNK2A1/FHIT/GSK3B/HSPA1A/HSP90AA1/HSP90AB1/MDM2/PLK1/PRKACA/PTK2/AURKA	12
BP	GO:1901655	cellular response to ketone	8/153	93/18670	9.56661E-07	9.70294E-06	4.47836E-06	AKT1/AR/EGFR/EIF4E/NR3C1/PPARG/SRC/AKR1C3	8
BP	GO:0034764	positive regulation of transmembrane transport	11/153	204/18670	9.76152E-07	9.87636E-06	4.5584E-06	ABL1/AKT1/AKT2/BRAF/CA2/MAPK14/F2/IGF1/INSR/PIK3R1/PTPN11	11
BP	GO:0001818	negative regulation of cytokine production	13/153	296/18670	1.0139E-06	1.02103E-05	4.71254E-06	BTK/EPHA2/F2/FGFR1/GSTP1/HGF/HMOX1/HSP90AB1/IGF1/JAK3/RAC1/RARA/TGFB2	13
BP	GO:0035821	modification of morphology or physiology of other organism	10/153	164/18670	1.01411E-06	1.02103E-05	4.71254E-06	BCL2L1/F2/HPN/INSR/NOS2/REG1A/S100A9/CCL5/SYK/TYMS	10
BP	GO:0035270	endocrine system development	9/153	127/18670	1.02456E-06	1.02904E-05	4.74951E-06	AKT1/BMP2/CDK6/GSK3B/INSR/MAPK1/MAP2K1/RAF1/TGFBR1	9
BP	GO:0060445	branching involved in salivary gland morphogenesis	5/153	23/18670	1.03398E-06	1.03599E-05	4.78155E-06	BMP7/FGFR1/FGFR2/HGF/TGM2	5
BP	GO:1901216	positive regulation of neuron death	8/153	94/18670	1.03846E-06	1.03795E-05	4.79064E-06	ABL1/PARP1/RHOA/CASP3/NQO1/GSK3B/NQO2/TGFB2	8
BP	GO:2001242	regulation of intrinsic apoptotic signaling pathway	10/153	165/18670	1.07203E-06	1.06892E-05	4.93358E-06	PARP1/AKT1/BCL2L1/HSPA1A/MDM2/MMP9/PTPN1/S100A9/SOD2/SRC	10
BP	GO:0090068	positive regulation of cell cycle process	13/153	298/18670	1.09324E-06	1.08745E-05	5.01908E-06	AKT1/RHOA/CDC42/CDK2/EGFR/FAP/FGFR1/IGF1/INSR/MDM2/PRKACA/AURKA/ADAM17	13
BP	GO:0010907	positive regulation of glucose metabolic process	6/153	42/18670	1.12881E-06	1.11744E-05	5.15748E-06	AKT1/AKT2/IGF1/INSR/PPARA/SRC	6
BP	GO:0031641	regulation of myelination	6/153	42/18670	1.12881E-06	1.11744E-05	5.15748E-06	AKT1/TYMP/HGF/RARA/RARB/RARG	6
BP	GO:0097696	STAT cascade	10/153	166/18670	1.13282E-06	1.11873E-05	5.16345E-06	ERBB4/F2/IGF1/IL2/JAK2/JAK3/KIT/PTPN1/CCL5/STAT1	10
BP	GO:0006006	glucose metabolic process	11/153	209/18670	1.23854E-06	1.21731E-05	5.61843E-06	AKT1/AKT2/ALDOA/MAPK14/GSK3B/IGF1/INSR/PPARA/RBP4/RORA/SRC	11
BP	GO:0051216	cartilage development	11/153	209/18670	1.23854E-06	1.21731E-05	5.61843E-06	BMP2/BMP7/MAPK14/FGFR1/MMP13/RARA/RARB/RARG/TGFBR1/TGFBR2/TYMS	11
BP	GO:1903391	regulation of adherens junction organization	7/153	67/18670	1.2461E-06	1.22183E-05	5.63932E-06	ABL1/RHOA/KDR/PTK2/RAC1/SRC/TEK	7
BP	GO:0030098	lymphocyte differentiation	14/153	353/18670	1.28965E-06	1.26154E-05	5.82257E-06	ABL1/RHOA/BTK/CDK6/IL2/ITK/JAK3/KIT/PIK3R1/RARA/RORA/SYK/ADAM17/TGFBR2	14
BP	GO:0060396	growth hormone receptor signaling pathway	5/153	24/18670	1.29747E-06	1.26618E-05	5.84402E-06	JAK2/JAK3/PIK3R1/PTK2/PTPN1	5
BP	GO:0010863	positive regulation of phospholipase C activity	6/153	43/18670	1.30303E-06	1.2683E-05	5.85381E-06	EGFR/ESR1/FGFR1/HRAS/ITK/KIT	6
BP	GO:0023061	signal release	16/153	462/18670	1.30579E-06	1.2683E-05	5.85381E-06	ANXA5/BTK/CYP19A1/DPP4/EGFR/FGFR1/FGG/GSK3B/HSPA8/JAK2/NOS2/PTPN11/RAC1/RAF1/RBP4/CCL5	16
BP	GO:0001657	ureteric bud development	8/153	97/18670	1.32059E-06	1.27369E-05	5.87868E-06	BMP2/BMP7/CAT/FGF1/FGFR1/FGFR2/RARA/RARB	8
BP	GO:0015908	fatty acid transport	8/153	97/18670	1.32059E-06	1.27369E-05	5.87868E-06	AKT1/AKT2/ACE/NOS2/PLA2G2A/PPARA/PPARG/SYK	8
BP	GO:1902882	regulation of response to oxidative stress	8/153	97/18670	1.32059E-06	1.27369E-05	5.87868E-06	PARP1/AKT1/BMP7/DHFR/HGF/MET/MMP3/SOD2	8
BP	GO:0050728	negative regulation of inflammatory response	10/153	169/18670	1.33362E-06	1.28326E-05	5.92285E-06	CYP19A1/F2/GSTP1/HGF/IGF1/IL2/PPARA/PPARG/RORA/TEK	10
BP	GO:0060736	prostate gland growth	4/153	11/18670	1.36841E-06	1.31367E-05	6.06322E-06	AR/CYP19A1/ESR1/FGFR2	4
BP	GO:0046323	glucose import	7/153	68/18670	1.37963E-06	1.32137E-05	6.09873E-06	AKT1/AKT2/MAPK14/IGF1/INSR/PIK3R1/PTPN11	7
BP	GO:0042476	odontogenesis	9/153	132/18670	1.41665E-06	1.34592E-05	6.21205E-06	RHOA/BMP2/BMP7/CA2/CTNNA1/FGFR2/PPARA/SRC/TGFB2	9
BP	GO:0043280	positive regulation of cysteine-type endopeptidase activity involved in apoptotic process	9/153	132/18670	1.41665E-06	1.34592E-05	6.21205E-06	APAF1/RHOA/CASP1/CTSD/DAPK1/JAK2/PPARG/S100A9/SYK	9
BP	GO:0030038	contractile actin filament bundle assembly	8/153	98/18670	1.42808E-06	1.34592E-05	6.21205E-06	ABL1/RHOA/CDC42/MET/PIK3R1/RAC1/SRC/TGFBR1	8
BP	GO:0043149	stress fiber assembly	8/153	98/18670	1.42808E-06	1.34592E-05	6.21205E-06	ABL1/RHOA/CDC42/MET/PIK3R1/RAC1/SRC/TGFBR1	8
BP	GO:0072163	mesonephric epithelium development	8/153	98/18670	1.42808E-06	1.34592E-05	6.21205E-06	BMP2/BMP7/CAT/FGF1/FGFR1/FGFR2/RARA/RARB	8
BP	GO:0072164	mesonephric tubule development	8/153	98/18670	1.42808E-06	1.34592E-05	6.21205E-06	BMP2/BMP7/CAT/FGF1/FGFR1/FGFR2/RARA/RARB	8
BP	GO:2001243	negative regulation of intrinsic apoptotic signaling pathway	8/153	98/18670	1.42808E-06	1.34592E-05	6.21205E-06	AKT1/BCL2L1/HSPA1A/MDM2/MMP9/PTPN1/SOD2/SRC	8
BP	GO:0003416	endochondral bone growth	6/153	44/18670	1.49862E-06	1.40598E-05	6.48925E-06	FGFR2/MMP13/RARA/RARB/RARG/TGFBR2	6
BP	GO:0010463	mesenchymal cell proliferation	6/153	44/18670	1.49862E-06	1.40598E-05	6.48925E-06	BMP2/BMP7/FGFR1/FGFR2/STAT1/TGFBR2	6
BP	GO:0070227	lymphocyte apoptotic process	7/153	69/18670	1.52492E-06	1.42741E-05	6.58816E-06	AKT1/BTK/IL2/JAK3/LGALS3/CCL5/BIRC7	7
BP	GO:1903050	regulation of proteolysis involved in cellular protein catabolic process	11/153	214/18670	1.56109E-06	1.45796E-05	6.72917E-06	AKT1/CSNK2A1/FHIT/GSK3B/HSPA1A/HSP90AB1/MDM2/PLK1/PRKACA/PTK2/AURKA	11
BP	GO:0009895	negative regulation of catabolic process	13/153	308/18670	1.57914E-06	1.47142E-05	6.79129E-06	AKT1/MAPK14/CSNK2A1/EGFR/FHIT/HGF/HMOX1/HSP90AB1/MET/NOS2/PIK3CG/PPARA/PTK2	13
BP	GO:0030260	entry into host cell	9/153	134/18670	1.6064E-06	1.47142E-05	6.79129E-06	CTSB/DPP4/EGFR/EPHA2/GRB2/HSPA1A/MET/PPIA/SRC	9
BP	GO:0044409	entry into host	9/153	134/18670	1.6064E-06	1.47142E-05	6.79129E-06	CTSB/DPP4/EGFR/EPHA2/GRB2/HSPA1A/MET/PPIA/SRC	9
BP	GO:0051806	entry into cell of other organism involved in symbiotic interaction	9/153	134/18670	1.6064E-06	1.47142E-05	6.79129E-06	CTSB/DPP4/EGFR/EPHA2/GRB2/HSPA1A/MET/PPIA/SRC	9
BP	GO:0051828	entry into other organism involved in symbiotic interaction	9/153	134/18670	1.6064E-06	1.47142E-05	6.79129E-06	CTSB/DPP4/EGFR/EPHA2/GRB2/HSPA1A/MET/PPIA/SRC	9
BP	GO:0002068	glandular epithelial cell development	5/153	25/18670	1.61115E-06	1.47142E-05	6.79129E-06	CDK6/GSK3B/RARA/RARB/RARG	5
BP	GO:0019430	removal of superoxide radicals	5/153	25/18670	1.61115E-06	1.47142E-05	6.79129E-06	BMP7/DHFR/NQO1/NOS3/SOD2	5
BP	GO:0060330	regulation of response to interferon-gamma	5/153	25/18670	1.61115E-06	1.47142E-05	6.79129E-06	HSP90AB1/JAK2/PPARG/STAT1/NR1H2	5
BP	GO:0060334	regulation of interferon-gamma-mediated signaling pathway	5/153	25/18670	1.61115E-06	1.47142E-05	6.79129E-06	HSP90AB1/JAK2/PPARG/STAT1/NR1H2	5
BP	GO:0071378	cellular response to growth hormone stimulus	5/153	25/18670	1.61115E-06	1.47142E-05	6.79129E-06	JAK2/JAK3/PIK3R1/PTK2/PTPN1	5
BP	GO:0003018	vascular process in circulatory system	10/153	173/18670	1.64926E-06	1.5029E-05	6.93659E-06	AKT1/RHOA/ACE/EGFR/FGG/HMOX1/NOS3/SOD2/SRC/TEK	10
BP	GO:0045861	negative regulation of proteolysis	14/153	363/18670	1.79076E-06	1.62825E-05	7.51512E-06	AKT1/XIAP/CSNK2A1/F2/FHIT/HGF/HSP90AB1/MDM2/MMP9/SERPINA1/RAF1/SRC/PRDX5/BIRC7	14
BP	GO:0001936	regulation of endothelial cell proliferation	10/153	176/18670	1.92694E-06	1.74822E-05	8.06884E-06	AKT1/BMP2/FGFR1/HMOX1/KDR/PPARG/STAT1/ADAM17/TEK/TGFBR1	10
BP	GO:0001823	mesonephros development	8/153	102/18670	1.93589E-06	1.75249E-05	8.08854E-06	BMP2/BMP7/CAT/FGF1/FGFR1/FGFR2/RARA/RARB	8
BP	GO:0022602	ovulation cycle process	6/153	46/18670	1.9619E-06	1.77215E-05	8.17929E-06	CASP3/ESR1/NOS3/PGR/SRC/TGFB2	6
BP	GO:0060740	prostate gland epithelium morphogenesis	5/153	26/18670	1.98162E-06	1.78216E-05	8.22549E-06	AR/BMP7/ESR1/FGFR2/RARG	5
BP	GO:0097066	response to thyroid hormone	5/153	26/18670	1.98162E-06	1.78216E-05	8.22549E-06	ANXA5/CTSB/CTSL/HPN/KIT	5
BP	GO:0046883	regulation of hormone secretion	12/153	266/18670	2.03323E-06	1.8246E-05	8.42138E-06	ANXA5/CYP19A1/DPP4/EGFR/FGFR1/FGG/JAK2/NOS2/PTPN11/RAC1/RBP4/CCL5	12
BP	GO:0051881	regulation of mitochondrial membrane potential	7/153	72/18670	2.03982E-06	1.82655E-05	8.43035E-06	ABL1/PARP1/AKT1/AKT2/BCL2L1/KDR/SRC	7
BP	GO:0046631	alpha-beta T cell activation	9/153	138/18670	2.05252E-06	1.83394E-05	8.4645E-06	ABL1/RHOA/IL2/ITK/JAK3/RARA/RORA/SYK/TGFBR2	9
BP	GO:0035722	interleukin-12-mediated signaling pathway	6/153	47/18670	2.23388E-06	1.98311E-05	9.15298E-06	CA1/CDC42/JAK2/MTAP/PPIA/SOD2	6
BP	GO:0070849	response to epidermal growth factor	6/153	47/18670	2.23388E-06	1.98311E-05	9.15298E-06	AKT1/EGFR/ERBB4/GSTP1/MAPK1/PTPN11	6
BP	GO:0098868	bone growth	6/153	47/18670	2.23388E-06	1.98311E-05	9.15298E-06	FGFR2/MMP13/RARA/RARB/RARG/TGFBR2	6
BP	GO:0001837	epithelial to mesenchymal transition	9/153	140/18670	2.31305E-06	2.0446E-05	9.43676E-06	BMP2/BMP7/FGFR2/GSK3B/HGF/HPN/TGFB2/TGFBR1/TGFBR2	9
BP	GO:0072073	kidney epithelium development	9/153	140/18670	2.31305E-06	2.0446E-05	9.43676E-06	BMP2/BMP7/CAT/FGF1/FGFR1/FGFR2/RARA/RARB/STAT1	9
BP	GO:0071466	cellular response to xenobiotic stimulus	10/153	180/18670	2.36E-06	2.08164E-05	9.60773E-06	NQO1/EGFR/EIF4E/NR3C1/GSTM1/GSTP1/HSP90AB1/NQO2/RORA/SULT1A1	10
BP	GO:0003148	outflow tract septum morphogenesis	5/153	27/18670	2.41596E-06	2.11743E-05	9.77292E-06	FGFR2/RARA/RARB/TGFB2/TGFBR2	5
BP	GO:0071450	cellular response to oxygen radical	5/153	27/18670	2.41596E-06	2.11743E-05	9.77292E-06	BMP7/DHFR/NQO1/NOS3/SOD2	5
BP	GO:0071451	cellular response to superoxide	5/153	27/18670	2.41596E-06	2.11743E-05	9.77292E-06	BMP7/DHFR/NQO1/NOS3/SOD2	5
BP	GO:0030595	leukocyte chemotaxis	11/153	224/18670	2.43438E-06	2.12905E-05	9.82654E-06	MAPK14/CYP19A1/KIT/LGALS3/PIK3CG/RAC1/S100A9/CCL5/SYK/ADAM17/TGFB2	11
BP	GO:0048871	multicellular organismal homeostasis	16/153	485/18670	2.44895E-06	2.13726E-05	9.86446E-06	ALB/CA2/EGFR/IGF1R/JAK2/LCN2/MET/NOS3/PRKACA/PTPN11/RAC1/RBP4/SRC/SYK/ADAM17/NR1H2	16
BP	GO:0051147	regulation of muscle cell differentiation	10/153	181/18670	2.48065E-06	2.16037E-05	9.97109E-06	ABL1/BMP2/CDC42/MAPK14/CTNNA1/FGFR2/IGF1/KIT/PPARA/SOD2	10
BP	GO:0055023	positive regulation of cardiac muscle tissue growth	6/153	48/18670	2.53585E-06	2.20378E-05	1.01715E-05	MAPK14/ERBB4/FGFR1/FGFR2/IGF1/MAPK1	6
BP	GO:0001649	osteoblast differentiation	11/153	225/18670	2.54168E-06	2.20421E-05	1.01734E-05	AKT1/BMP2/BMP7/CAT/CDK6/EPHA2/FGFR2/HGF/IGF1/PRKACA/PTK2	11
BP	GO:0046651	lymphocyte proliferation	12/153	272/18670	2.56231E-06	2.21744E-05	1.02345E-05	ABL1/BTK/CASP3/IGF1/IL2/IMPDH1/JAK3/LGALS3/PIK3CG/CCL5/SYK/TGFBR2	12
BP	GO:1904029	regulation of cyclin-dependent protein kinase activity	8/153	106/18670	2.58979E-06	2.23654E-05	1.03227E-05	AKT1/CASP3/CDK7/EGFR/HSP90AB1/PLK1/SRC/ADAM17	8
BP	GO:0008217	regulation of blood pressure	10/153	182/18670	2.60664E-06	2.24639E-05	1.03681E-05	AR/RHOA/ACE/HMOX1/MME/NOS2/NOS3/PPARA/PPARG/SOD2	10
BP	GO:0043124	negative regulation of I-kappaB kinase/NF-kappaB signaling	6/153	49/18670	2.87026E-06	2.45241E-05	1.1319E-05	ABL1/RHOA/ESR1/GSTP1/RORA/STAT1	6
BP	GO:0071349	cellular response to interleukin-12	6/153	49/18670	2.87026E-06	2.45241E-05	1.1319E-05	CA1/CDC42/JAK2/MTAP/PPIA/SOD2	6
BP	GO:1904707	positive regulation of vascular smooth muscle cell proliferation	6/153	49/18670	2.87026E-06	2.45241E-05	1.1319E-05	IGF1/JAK2/MDM2/MMP2/MMP9/NQO2	6
BP	GO:0042098	T cell proliferation	10/153	184/18670	2.8754E-06	2.45241E-05	1.1319E-05	ABL1/CASP3/IGF1/IL2/JAK3/LGALS3/PIK3CG/CCL5/SYK/TGFBR2	10
BP	GO:0048639	positive regulation of developmental growth	10/153	184/18670	2.8754E-06	2.45241E-05	1.1319E-05	AKT1/MAPK14/ERBB4/FGFR1/FGFR2/IGF1/INSR/MAPK1/REG1A/TGFBR2	10
BP	GO:0042730	fibrinolysis	5/153	28/18670	2.9218E-06	2.48173E-05	1.14543E-05	F2/FAP/FGG/PLAU/PLG	5
BP	GO:0060512	prostate gland morphogenesis	5/153	28/18670	2.9218E-06	2.48173E-05	1.14543E-05	AR/BMP7/ESR1/FGFR2/RARG	5
BP	GO:0061045	negative regulation of wound healing	7/153	76/18670	2.94555E-06	2.49676E-05	1.15237E-05	ANXA5/F2/FAP/FGG/NOS3/PLAU/PLG	7
BP	GO:1904659	glucose transmembrane transport	8/153	108/18670	2.98156E-06	2.52211E-05	1.16407E-05	AKT1/AKT2/BRAF/MAPK14/IGF1/INSR/PIK3R1/PTPN11	8
BP	GO:1903708	positive regulation of hemopoiesis	10/153	185/18670	3.01859E-06	2.54821E-05	1.17612E-05	RHOA/BTK/CA2/MAPK14/HSPA1A/IL2/RARA/STAT1/SYK/TGFBR2	10
BP	GO:0042176	regulation of protein catabolic process	14/153	381/18670	3.14599E-06	2.65034E-05	1.22325E-05	AKT1/CSNK2A1/EGFR/FHIT/GSK3B/HSPA1A/HSP90AA1/HSP90AB1/MDM2/NOS2/PLK1/PRKACA/PTK2/AURKA	14
BP	GO:0070671	response to interleukin-12	6/153	50/18670	3.23973E-06	2.72375E-05	1.25714E-05	CA1/CDC42/JAK2/MTAP/PPIA/SOD2	6
BP	GO:0055123	digestive system development	9/153	146/18670	3.27263E-06	2.74581E-05	1.26732E-05	EGFR/FGFR2/INSR/KIT/RARB/REG1A/TGFB2/TGFBR2/TYMS	9
BP	GO:1905475	regulation of protein localization to membrane	10/153	187/18670	3.32367E-06	2.78298E-05	1.28447E-05	AKT1/AKT2/AR/BCL2L1/EGFR/EPHA2/HRAS/LGALS3/PIK3R1/MAPK8	10
BP	GO:0000303	response to superoxide	5/153	29/18670	3.50726E-06	2.91894E-05	1.34723E-05	BMP7/DHFR/NQO1/NOS3/SOD2	5
BP	GO:0005979	regulation of glycogen biosynthetic process	5/153	29/18670	3.50726E-06	2.91894E-05	1.34723E-05	AKT1/AKT2/GSK3B/IGF1/INSR	5
BP	GO:0010962	regulation of glucan biosynthetic process	5/153	29/18670	3.50726E-06	2.91894E-05	1.34723E-05	AKT1/AKT2/GSK3B/IGF1/INSR	5
BP	GO:0001954	positive regulation of cell-matrix adhesion	6/153	51/18670	3.64702E-06	3.02915E-05	1.39809E-05	ABL1/CDK6/GSK3B/KDR/RAC1/TEK	6
BP	GO:0043536	positive regulation of blood vessel endothelial cell migration	7/153	79/18670	3.82633E-06	3.16535E-05	1.46096E-05	ABL1/AKT1/FGFR1/HMOX1/KDR/NOS3/ADAM17	7
BP	GO:1900034	regulation of cellular response to heat	7/153	79/18670	3.82633E-06	3.16535E-05	1.46096E-05	BAG1/GSK3B/HSPA1A/HSPA8/HSP90AA1/HSP90AB1/MAPK1	7
BP	GO:0060560	developmental growth involved in morphogenesis	11/153	235/18670	3.86507E-06	3.18785E-05	1.47134E-05	ABL1/ESR1/FGF1/FGFR2/GSK3B/HSP90AA1/HSP90AB1/RARG/REG1A/AURKA/TGFBR2	11
BP	GO:2001056	positive regulation of cysteine-type endopeptidase activity	9/153	149/18670	3.86897E-06	3.18785E-05	1.47134E-05	APAF1/RHOA/CASP1/CTSD/DAPK1/JAK2/PPARG/S100A9/SYK	9
BP	GO:0001938	positive regulation of endothelial cell proliferation	8/153	112/18670	3.91767E-06	3.21514E-05	1.48393E-05	AKT1/BMP2/FGFR1/HMOX1/KDR/ADAM17/TEK/TGFBR1	8
BP	GO:0008645	hexose transmembrane transport	8/153	112/18670	3.91767E-06	3.21514E-05	1.48393E-05	AKT1/AKT2/BRAF/MAPK14/IGF1/INSR/PIK3R1/PTPN11	8
BP	GO:0071478	cellular response to radiation	10/153	191/18670	4.01504E-06	3.28851E-05	1.5178E-05	PARP1/AKT2/BCL2L1/CHEK1/MAPK14/GRB2/HRAS/MDM2/MME/PIK3R1	10
BP	GO:0060421	positive regulation of heart growth	6/153	52/18670	4.09501E-06	3.34736E-05	1.54496E-05	MAPK14/ERBB4/FGFR1/FGFR2/IGF1/MAPK1	6
BP	GO:0000305	response to oxygen radical	5/153	30/18670	4.181E-06	3.39747E-05	1.56809E-05	BMP7/DHFR/NQO1/NOS3/SOD2	5
BP	GO:0048384	retinoic acid receptor signaling pathway	5/153	30/18670	4.181E-06	3.39747E-05	1.56809E-05	RARA/RARB/RARG/RXRB/AKR1C3	5
BP	GO:0097421	liver regeneration	5/153	30/18670	4.181E-06	3.39747E-05	1.56809E-05	EGFR/HMOX1/REG1A/AURKA/TYMS	5
BP	GO:0016999	antibiotic metabolic process	9/153	151/18670	4.31646E-06	3.50065E-05	1.61571E-05	ADH1C/ALDH2/CAT/EGFR/MMP3/RAC1/SULT1A1/AKR1C3/PRDX5	9
BP	GO:0015749	monosaccharide transmembrane transport	8/153	114/18670	4.47223E-06	3.6128E-05	1.66747E-05	AKT1/AKT2/BRAF/MAPK14/IGF1/INSR/PIK3R1/PTPN11	8
BP	GO:0030218	erythrocyte differentiation	8/153	114/18670	4.47223E-06	3.6128E-05	1.66747E-05	CASP3/CDK6/MAPK14/HSPA1A/JAK2/JAK3/KIT/STAT1	8
BP	GO:0007045	cell-substrate adherens junction assembly	7/153	81/18670	4.52758E-06	3.64325E-05	1.68153E-05	ABL1/RHOA/KDR/PTK2/RAC1/SRC/TEK	7
BP	GO:0048041	focal adhesion assembly	7/153	81/18670	4.52758E-06	3.64325E-05	1.68153E-05	ABL1/RHOA/KDR/PTK2/RAC1/SRC/TEK	7
BP	GO:0070228	regulation of lymphocyte apoptotic process	6/153	53/18670	4.58674E-06	3.68367E-05	1.70018E-05	BTK/IL2/JAK3/LGALS3/CCL5/BIRC7	6
BP	GO:0090092	regulation of transmembrane receptor protein serine/threonine kinase signaling pathway	11/153	241/18670	4.92028E-06	3.94387E-05	1.82028E-05	ABL1/PARP1/XIAP/BMP2/BMP7/HSPA1A/HSP90AB1/ADAM17/TGFB2/TGFBR1/TGFBR2	11
BP	GO:0051604	protein maturation	14/153	397/18670	5.05164E-06	4.04131E-05	1.86525E-05	PARP1/XIAP/CASP1/CASP3/ACE/F2/FGG/HPN/MDM2/MME/PLAU/PRKACA/SRC/BIRC7	14
BP	GO:0034219	carbohydrate transmembrane transport	8/153	116/18670	5.09193E-06	4.06566E-05	1.87649E-05	AKT1/AKT2/BRAF/MAPK14/IGF1/INSR/PIK3R1/PTPN11	8
BP	GO:0010952	positive regulation of peptidase activity	10/153	197/18670	5.28539E-06	4.21199E-05	1.94403E-05	APAF1/RHOA/CASP1/MAPK14/CTSD/DAPK1/JAK2/PPARG/S100A9/SYK	10
BP	GO:0009410	response to xenobiotic stimulus	12/153	292/18670	5.30876E-06	4.22246E-05	1.94886E-05	NQO1/EGFR/EIF4E/NR3C1/GSTM1/GSTP1/HSP90AB1/MDM2/NQO2/PPARG/RORA/SULT1A1	12
BP	GO:2000106	regulation of leukocyte apoptotic process	7/153	83/18670	5.3327E-06	4.23335E-05	1.95389E-05	BTK/IL2/JAK3/LGALS3/CCL5/ADAM17/BIRC7	7
BP	GO:0010906	regulation of glucose metabolic process	8/153	117/18670	5.42808E-06	4.30079E-05	1.98501E-05	AKT1/AKT2/GSK3B/IGF1/INSR/PPARA/RORA/SRC	8
BP	GO:0014910	regulation of smooth muscle cell migration	7/153	84/18670	5.77788E-06	4.55334E-05	2.10158E-05	ACE/GSTP1/IGF1/MDM2/PLAU/CCL5/SRC	7
BP	GO:0051492	regulation of stress fiber assembly	7/153	84/18670	5.77788E-06	4.55334E-05	2.10158E-05	ABL1/RHOA/CDC42/MET/PIK3R1/RAC1/TGFBR1	7
BP	GO:0007179	transforming growth factor beta receptor signaling pathway	10/153	199/18670	5.77992E-06	4.55334E-05	2.10158E-05	PARP1/RHOA/HSPA1A/HSP90AB1/PTK2/SRC/ADAM17/TGFB2/TGFBR1/TGFBR2	10
BP	GO:0061384	heart trabecula morphogenesis	5/153	32/18670	5.83066E-06	4.58457E-05	2.11599E-05	BMP7/RBP4/TEK/TGFB2/TGFBR1	5
BP	GO:0034308	primary alcohol metabolic process	7/153	85/18670	6.25353E-06	4.90772E-05	2.26514E-05	ADH1C/ALDH2/BMP2/IGF1/RBP4/SULT1A1/AKR1C3	7
BP	GO:1903522	regulation of blood circulation	12/153	297/18670	6.3091E-06	4.94193E-05	2.28093E-05	AKT1/RHOA/ACE/EGFR/FGG/IL2/JAK2/MDM2/NOS3/PIK3CG/PRKACA/TGFB2	12
BP	GO:0002683	negative regulation of immune system process	15/153	463/18670	6.39096E-06	4.99657E-05	2.30615E-05	AKT1/BTK/CASP3/CDK6/CYP19A1/HMOX1/IL2/JAK3/LGALS3/MMP12/PIK3R1/PPARG/RARA/TGFB2/NR1H2	15
BP	GO:0019318	hexose metabolic process	11/153	249/18670	6.71413E-06	5.2393E-05	2.41818E-05	AKT1/AKT2/ALDOA/MAPK14/GSK3B/IGF1/INSR/PPARA/RBP4/RORA/SRC	11
BP	GO:0007260	tyrosine phosphorylation of STAT protein	7/153	86/18670	6.76129E-06	5.26615E-05	2.43057E-05	ERBB4/IGF1/IL2/JAK2/JAK3/KIT/CCL5	7
BP	GO:0048011	neurotrophin TRK receptor signaling pathway	5/153	33/18670	6.82663E-06	5.29705E-05	2.44483E-05	CASP3/GRB2/PTPN11/RAF1/SRC	5
BP	GO:1901890	positive regulation of cell junction assembly	5/153	33/18670	6.82663E-06	5.29705E-05	2.44483E-05	ABL1/EPHA2/KDR/RAC1/TEK	5
BP	GO:0010951	negative regulation of endopeptidase activity	11/153	250/18670	6.97423E-06	5.39131E-05	2.48834E-05	AKT1/XIAP/CSNK2A1/HGF/MDM2/MMP9/SERPINA1/RAF1/SRC/PRDX5/BIRC7	11
BP	GO:0030072	peptide hormone secretion	11/153	250/18670	6.97423E-06	5.39131E-05	2.48834E-05	ANXA5/DPP4/EGFR/FGG/JAK2/NOS2/PTPN11/RAC1/RAF1/RBP4/CCL5	11
BP	GO:0006206	pyrimidine nucleobase metabolic process	4/153	16/18670	7.30956E-06	5.63997E-05	2.60311E-05	TYMP/MAPK1/TYMS/UMPS	4
BP	GO:0032434	regulation of proteasomal ubiquitin-dependent protein catabolic process	8/153	122/18670	7.40477E-06	5.69216E-05	2.62719E-05	AKT1/FHIT/GSK3B/HSPA1A/HSP90AB1/MDM2/PLK1/AURKA	8
BP	GO:1905477	positive regulation of protein localization to membrane	8/153	122/18670	7.40477E-06	5.69216E-05	2.62719E-05	AKT1/AKT2/EGFR/EPHA2/HRAS/LGALS3/PIK3R1/MAPK8	8
BP	GO:0071621	granulocyte chemotaxis	8/153	123/18670	7.86547E-06	6.02378E-05	2.78025E-05	MAPK14/LGALS3/PIK3CG/RAC1/S100A9/CCL5/SYK/TGFB2	8
BP	GO:0097194	execution phase of apoptosis	7/153	88/18670	7.87994E-06	6.02378E-05	2.78025E-05	AKT1/APAF1/BCL2L1/CASP1/CASP3/CASP7/FAP	7
BP	GO:1904035	regulation of epithelial cell apoptotic process	7/153	88/18670	7.87994E-06	6.02378E-05	2.78025E-05	ABL1/FGG/HMOX1/JAK2/KDR/TEK/AKR1C3	7
BP	GO:0032148	activation of protein kinase B activity	5/153	34/18670	7.95096E-06	6.06684E-05	2.80013E-05	AKT1/FGF1/IGF1/INSR/SRC	5
BP	GO:0046427	positive regulation of JAK-STAT cascade	7/153	89/18670	8.4944E-06	6.46953E-05	2.98599E-05	ERBB4/F2/IGF1/IL2/JAK2/KIT/CCL5	7
BP	GO:0090276	regulation of peptide hormone secretion	10/153	208/18670	8.53439E-06	6.4761E-05	2.98902E-05	ANXA5/DPP4/EGFR/FGG/JAK2/NOS2/PTPN11/RAC1/RBP4/CCL5	10
BP	GO:1901215	negative regulation of neuron death	10/153	208/18670	8.53439E-06	6.4761E-05	2.98902E-05	AKT1/RHOA/BCL2L1/GSK3B/HMOX1/HRAS/HSP90AB1/JAK2/PPARA/SOD2	10
BP	GO:0001836	release of cytochrome c from mitochondria	6/153	59/18670	8.64537E-06	6.54827E-05	3.02233E-05	AKT1/BCL2L1/HGF/IGF1/MMP9/SOD2	6
BP	GO:0050680	negative regulation of epithelial cell proliferation	9/153	165/18670	8.8841E-06	6.70449E-05	3.09443E-05	AR/CDK6/FGFR2/HPN/PPARG/STAT1/TGFB2/TGFBR1/VDR	9
BP	GO:0071695	anatomical structure maturation	9/153	165/18670	8.8841E-06	6.70449E-05	3.09443E-05	RHOA/BMP2/FGG/IGF1/MMP2/PGR/AURKA/TGFB2/TYMS	9
BP	GO:0034333	adherens junction assembly	7/153	90/18670	9.1481E-06	6.87857E-05	3.17478E-05	ABL1/RHOA/KDR/PTK2/RAC1/SRC/TEK	7
BP	GO:1903035	negative regulation of response to wounding	7/153	90/18670	9.1481E-06	6.87857E-05	3.17478E-05	ANXA5/F2/FAP/FGG/NOS3/PLAU/PLG	7
BP	GO:0070873	regulation of glycogen metabolic process	5/153	35/18670	9.21509E-06	6.90379E-05	3.18642E-05	AKT1/AKT2/GSK3B/IGF1/INSR	5
BP	GO:1904031	positive regulation of cyclin-dependent protein kinase activity	5/153	35/18670	9.21509E-06	6.90379E-05	3.18642E-05	AKT1/EGFR/HSP90AB1/SRC/ADAM17	5
BP	GO:0097529	myeloid leukocyte migration	10/153	210/18670	9.28117E-06	6.9407E-05	3.20346E-05	MAPK14/CYP19A1/KIT/LGALS3/PIK3CG/RAC1/S100A9/CCL5/SYK/TGFB2	10
BP	GO:0045667	regulation of osteoblast differentiation	8/153	126/18670	9.39549E-06	7.01349E-05	3.23705E-05	BMP2/BMP7/CDK6/FGFR2/HGF/IGF1/PRKACA/PTK2	8
BP	GO:0045725	positive regulation of glycogen biosynthetic process	4/153	17/18670	9.49778E-06	7.07704E-05	3.26638E-05	AKT1/AKT2/IGF1/INSR	4
BP	GO:0035051	cardiocyte differentiation	9/153	167/18670	9.79165E-06	7.28287E-05	3.36138E-05	BMP2/BMP7/EGFR/IGF1/PPARA/MAPK1/RARA/RARB/TGFB2	9
BP	GO:0014909	smooth muscle cell migration	7/153	91/18670	9.84298E-06	7.30789E-05	3.37293E-05	ACE/GSTP1/IGF1/MDM2/PLAU/CCL5/SRC	7
BP	GO:0032368	regulation of lipid transport	8/153	127/18670	9.95825E-06	7.38019E-05	3.4063E-05	AKT1/AKT2/CYP19A1/PPARA/PPARG/PTPN11/SYK/NR1H2	8
BP	GO:0051302	regulation of cell division	9/153	168/18670	1.02744E-05	7.60083E-05	3.50813E-05	RHOA/BCL2L1/CAT/CDC42/FGF1/FGFR2/PLK1/AURKA/TGFB2	9
BP	GO:0032386	regulation of intracellular transport	14/153	423/18670	1.03802E-05	7.66536E-05	3.53792E-05	AKT2/MAPK14/GSK3B/HMOX1/HRAS/MDM2/PIK3R1/PRKACA/MAPK1/MAP2K1/PTPN1/PTPN11/SRC/SYK	14
BP	GO:0051091	positive regulation of DNA-binding transcription factor activity	11/153	261/18670	1.04702E-05	7.71262E-05	3.55973E-05	AKT1/AR/BTK/CAT/ESR1/ESR2/HSPA1A/JAK2/KIT/PPARG/S100A9	11
BP	GO:1905953	negative regulation of lipid localization	6/153	61/18670	1.05113E-05	7.71262E-05	3.55973E-05	AKT1/AKT2/PPARA/PPARG/PTPN11/NR1H2	6
BP	GO:1904894	positive regulation of STAT cascade	7/153	92/18670	1.05811E-05	7.71262E-05	3.55973E-05	ERBB4/F2/IGF1/IL2/JAK2/KIT/CCL5	7
BP	GO:0003417	growth plate cartilage development	5/153	36/18670	1.0631E-05	7.71262E-05	3.55973E-05	MMP13/RARA/RARB/RARG/TGFBR2	5
BP	GO:0009112	nucleobase metabolic process	5/153	36/18670	1.0631E-05	7.71262E-05	3.55973E-05	TYMP/MAPK1/TYMS/UMPS/GMPR2	5
BP	GO:0010742	macrophage derived foam cell differentiation	5/153	36/18670	1.0631E-05	7.71262E-05	3.55973E-05	PLA2G2A/PPARA/PPARG/STAT1/NR1H2	5
BP	GO:0045740	positive regulation of DNA replication	5/153	36/18670	1.0631E-05	7.71262E-05	3.55973E-05	CDK2/EGFR/FGFR1/HRAS/RAC1	5
BP	GO:0090077	foam cell differentiation	5/153	36/18670	1.0631E-05	7.71262E-05	3.55973E-05	PLA2G2A/PPARA/PPARG/STAT1/NR1H2	5
BP	GO:0090218	positive regulation of lipid kinase activity	5/153	36/18670	1.0631E-05	7.71262E-05	3.55973E-05	F2/KIT/PTK2/SRC/TEK	5
BP	GO:0090322	regulation of superoxide metabolic process	5/153	36/18670	1.0631E-05	7.71262E-05	3.55973E-05	BMP7/DHFR/EGFR/GSTP1/SYK	5
BP	GO:0051100	negative regulation of binding	9/153	169/18670	1.07773E-05	7.80503E-05	3.60238E-05	AKT1/ACE/GSK3B/HMOX1/JAK2/MET/PPARA/MAPK8/AURKA	9
BP	GO:0022604	regulation of cell morphogenesis	15/153	484/18670	1.08378E-05	7.83236E-05	3.615E-05	ABL1/ALDOA/RHOA/CDC42/F2/FGG/GSK3B/HPN/KDR/KIT/MAP2K1/PTK2/RAC1/REG1A/SRC	15
BP	GO:0010466	negative regulation of peptidase activity	11/153	262/18670	1.0853E-05	7.83236E-05	3.615E-05	AKT1/XIAP/CSNK2A1/HGF/MDM2/MMP9/SERPINA1/RAF1/SRC/PRDX5/BIRC7	11
BP	GO:0009416	response to light stimulus	12/153	314/18670	1.10589E-05	7.96704E-05	3.67716E-05	PARP1/AKT1/AKT2/CASP3/CAT/CHEK1/EGFR/KIT/MDM2/MME/PIK3R1/MAPK8	12
BP	GO:0034754	cellular hormone metabolic process	8/153	129/18670	1.11694E-05	8.03262E-05	3.70743E-05	ADH1C/BMP2/CYP19A1/ESR1/HSD17B1/RBP4/SULT1A1/AKR1C3	8
BP	GO:0032092	positive regulation of protein binding	7/153	93/18670	1.13645E-05	8.14453E-05	3.75908E-05	ABL1/BMP2/ACE/GSK3B/HSP90AB1/LGALS3/MMP9	7
BP	GO:0036473	cell death in response to oxidative stress	7/153	93/18670	1.13645E-05	8.14453E-05	3.75908E-05	PARP1/AKT1/HGF/JAK2/MET/MMP3/SOD2	7
BP	GO:0010676	positive regulation of cellular carbohydrate metabolic process	6/153	62/18670	1.15594E-05	8.24129E-05	3.80374E-05	AKT1/AKT2/IGF1/INSR/PPARA/SRC	6
BP	GO:0046824	positive regulation of nucleocytoplasmic transport	6/153	62/18670	1.15594E-05	8.24129E-05	3.80374E-05	MAPK14/GSK3B/MDM2/PIK3R1/PRKACA/MAPK1	6
BP	GO:0055025	positive regulation of cardiac muscle tissue development	6/153	62/18670	1.15594E-05	8.24129E-05	3.80374E-05	MAPK14/ERBB4/FGFR1/FGFR2/IGF1/MAPK1	6
BP	GO:0031330	negative regulation of cellular catabolic process	11/153	264/18670	1.16552E-05	8.29526E-05	3.82865E-05	AKT1/MAPK14/CSNK2A1/FHIT/HGF/HMOX1/HSP90AB1/MET/PIK3CG/PPARA/PTK2	11
BP	GO:0070875	positive regulation of glycogen metabolic process	4/153	18/18670	1.21337E-05	8.62096E-05	3.97897E-05	AKT1/AKT2/IGF1/INSR	4
BP	GO:0003156	regulation of animal organ formation	5/153	37/18670	1.22112E-05	8.64632E-05	3.99068E-05	AR/BMP2/BMP7/FGF1/FGFR1	5
BP	GO:0032885	regulation of polysaccharide biosynthetic process	5/153	37/18670	1.22112E-05	8.64632E-05	3.99068E-05	AKT1/AKT2/GSK3B/IGF1/INSR	5
BP	GO:0050920	regulation of chemotaxis	10/153	217/18670	1.23572E-05	8.7347E-05	4.03147E-05	MAPK14/CYP19A1/FGF1/FGFR1/GSTP1/KDR/MET/RAC1/CCL5/ADAM17	10
BP	GO:0046887	positive regulation of hormone secretion	8/153	131/18670	1.25024E-05	8.8222E-05	4.07185E-05	CYP19A1/EGFR/FGFR1/FGG/JAK2/PTPN11/RAC1/RBP4	8
BP	GO:0046637	regulation of alpha-beta T cell differentiation	6/153	63/18670	1.26904E-05	8.93957E-05	4.12603E-05	RHOA/IL2/JAK3/RARA/SYK/TGFBR2	6
BP	GO:0110020	regulation of actomyosin structure organization	7/153	95/18670	1.30758E-05	9.16415E-05	4.22968E-05	ABL1/RHOA/CDC42/MET/PIK3R1/RAC1/TGFBR1	7
BP	GO:1903076	regulation of protein localization to plasma membrane	7/153	95/18670	1.30758E-05	9.16415E-05	4.22968E-05	AKT1/AR/BCL2L1/EGFR/EPHA2/LGALS3/PIK3R1	7
BP	GO:2000060	positive regulation of ubiquitin-dependent protein catabolic process	7/153	95/18670	1.30758E-05	9.16415E-05	4.22968E-05	AKT1/GSK3B/HSPA1A/MDM2/PLK1/PTK2/AURKA	7
BP	GO:0031668	cellular response to extracellular stimulus	11/153	268/18670	1.34155E-05	9.3863E-05	4.33221E-05	ALB/GSTP1/HMOX1/HSPA8/LCN2/MDM2/PPARG/MAPK1/MAPK8/VDR/AKR1C3	11
BP	GO:0007249	I-kappaB kinase/NF-kappaB signaling	11/153	269/18670	1.38901E-05	9.68248E-05	4.46891E-05	ABL1/AKT1/RHOA/BTK/CASP1/ESR1/GSTP1/HMOX1/RORA/STAT1/TGM2	11
BP	GO:0032768	regulation of monooxygenase activity	6/153	64/18670	1.39092E-05	9.68248E-05	4.46891E-05	AKT1/DHFR/EGFR/HSP90AA1/NOS3/VDR	6
BP	GO:0043550	regulation of lipid kinase activity	6/153	64/18670	1.39092E-05	9.68248E-05	4.46891E-05	F2/KIT/PIK3R1/PTK2/SRC/TEK	6
BP	GO:0042770	signal transduction in response to DNA damage	8/153	133/18670	1.3967E-05	9.69141E-05	4.47303E-05	ABL1/CDK2/CHEK1/MAPK14/GRB2/MDM2/PLK1/AURKA	8
BP	GO:0060045	positive regulation of cardiac muscle cell proliferation	5/153	38/18670	1.3969E-05	9.69141E-05	4.47303E-05	MAPK14/ERBB4/FGFR1/FGFR2/MAPK1	5
BP	GO:0045165	cell fate commitment	11/153	270/18670	1.43792E-05	9.95928E-05	4.59667E-05	AR/RHOA/BMP2/CASP3/ERBB4/FGFR1/FGFR2/PPARG/RARA/RORA/TGFBR1	11
BP	GO:0032355	response to estradiol	8/153	134/18670	1.47518E-05	0.000101831	4.7E-05	BMP7/CASP3/CAT/NQO1/EGFR/ESR1/GSTP1/RARA	8
BP	GO:0048565	digestive tract development	8/153	134/18670	1.47518E-05	0.000101831	4.7E-05	EGFR/FGFR2/KIT/RARB/REG1A/TGFB2/TGFBR2/TYMS	8
BP	GO:0060249	anatomical structure homeostasis	14/153	437/18670	1.49485E-05	0.000102994	4.75367E-05	PARP1/ALB/ALDOA/CA2/EGFR/HSP90AA1/HSP90AB1/NOS3/MAPK1/PTPN11/RAC1/RBP4/SRC/SYK	14
BP	GO:0007044	cell-substrate junction assembly	7/153	97/18670	1.49951E-05	0.000102994	4.75367E-05	ABL1/RHOA/KDR/PTK2/RAC1/SRC/TEK	7
BP	GO:0032231	regulation of actin filament bundle assembly	7/153	97/18670	1.49951E-05	0.000102994	4.75367E-05	ABL1/RHOA/CDC42/MET/PIK3R1/RAC1/TGFBR1	7
BP	GO:0070663	regulation of leukocyte proliferation	10/153	222/18670	1.50597E-05	0.000103266	4.76623E-05	BTK/CASP3/GSTP1/IGF1/IL2/JAK3/LGALS3/CCL5/SYK/TGFBR2	10
BP	GO:0033189	response to vitamin A	4/153	19/18670	1.52715E-05	0.000104199	4.80929E-05	CAT/PPARG/RARA/TYMS	4
BP	GO:0090201	negative regulation of release of cytochrome c from mitochondria	4/153	19/18670	1.52715E-05	0.000104199	4.80929E-05	AKT1/BCL2L1/HGF/IGF1	4
BP	GO:2000251	positive regulation of actin cytoskeleton reorganization	4/153	19/18670	1.52715E-05	0.000104199	4.80929E-05	ABL1/CDC42/HRAS/TEK	4
BP	GO:1902105	regulation of leukocyte differentiation	11/153	272/18670	1.54025E-05	0.00010492	4.84253E-05	ABL1/RHOA/BTK/CA2/CDK6/IL2/JAK3/PIK3R1/RARA/SYK/TGFBR2	11
BP	GO:0030900	forebrain development	13/153	381/18670	1.58003E-05	0.000107453	4.95944E-05	APAF1/RHOA/BMP2/CASP3/CDK6/EGFR/ERBB4/FGFR1/FGFR2/GSK3B/RARA/RARB/SRC	13
BP	GO:0038179	neurotrophin signaling pathway	5/153	39/18670	1.59179E-05	0.000107852	4.97786E-05	CASP3/GRB2/PTPN11/RAF1/SRC	5
BP	GO:2000826	regulation of heart morphogenesis	5/153	39/18670	1.59179E-05	0.000107852	4.97786E-05	BMP2/BMP7/TGFB2/TGFBR1/TGFBR2	5
BP	GO:0061448	connective tissue development	11/153	273/18670	1.59374E-05	0.000107852	4.97786E-05	BMP2/BMP7/MAPK14/FGFR1/MMP13/RARA/RARB/RARG/TGFBR1/TGFBR2/TYMS	11
BP	GO:0010950	positive regulation of endopeptidase activity	9/153	178/18670	1.6332E-05	0.000110341	5.09275E-05	APAF1/RHOA/CASP1/CTSD/DAPK1/JAK2/PPARG/S100A9/SYK	9
BP	GO:0010506	regulation of autophagy	12/153	327/18670	1.657E-05	0.000111766	5.15852E-05	ABL1/AKT1/CASP3/DAPK1/GSK3B/HGF/HMOX1/KDR/MET/PRKACA/MAPK8/PTK2	12
BP	GO:0045428	regulation of nitric oxide biosynthetic process	6/153	66/18670	1.66306E-05	0.000111809	5.16052E-05	AKT1/HSP90AA1/HSP90AB1/INSR/JAK2/RAC1	6
BP	GO:1905207	regulation of cardiocyte differentiation	6/153	66/18670	1.66306E-05	0.000111809	5.16052E-05	BMP2/BMP7/EGFR/IGF1/PPARA/TGFB2	6
BP	GO:0045765	regulation of angiogenesis	13/153	383/18670	1.6696E-05	0.000112067	5.1724E-05	ABL1/RHOA/EPHA2/FGF1/HGF/HMOX1/KDR/NOS3/PPARG/STAT1/TEK/TGFB2/TGFBR2	13
BP	GO:0033157	regulation of intracellular protein transport	10/153	225/18670	1.69139E-05	0.000113345	5.23141E-05	AKT2/MAPK14/GSK3B/HRAS/MDM2/PIK3R1/PRKACA/MAPK1/PTPN1/PTPN11	10
BP	GO:2001235	positive regulation of apoptotic signaling pathway	9/153	179/18670	1.70778E-05	0.000114258	5.27353E-05	APAF1/BCL2L1/CTNNA1/GSK3B/JAK2/MMP9/MAPK8/S100A9/TGFBR1	9
BP	GO:0070301	cellular response to hydrogen peroxide	7/153	99/18670	1.71416E-05	0.000114499	5.28468E-05	ABL1/NQO1/HGF/LCN2/MDM2/MET/SRC	7
BP	GO:0046425	regulation of JAK-STAT cascade	8/153	137/18670	1.73323E-05	0.000115586	5.33484E-05	ERBB4/F2/IGF1/IL2/JAK2/JAK3/KIT/CCL5	8
BP	GO:0051495	positive regulation of cytoskeleton organization	10/153	226/18670	1.75742E-05	0.00011701	5.40055E-05	ABL1/RHOA/CDC42/GRB2/HRAS/HSPA1A/MET/RAC1/TEK/TGFBR1	10
BP	GO:0071346	cellular response to interferon-gamma	9/153	180/18670	1.78524E-05	0.000118671	5.47722E-05	CASP1/DAPK1/HSP90AB1/JAK2/NOS2/PPARG/CCL5/STAT1/NR1H2	9
BP	GO:0010657	muscle cell apoptotic process	7/153	100/18670	1.83065E-05	0.000121299	5.59851E-05	APAF1/BMP7/HMOX1/IGF1/JAK2/PPARG/SOD2	7
BP	GO:0034446	substrate adhesion-dependent cell spreading	7/153	100/18670	1.83065E-05	0.000121299	5.59851E-05	ABL1/CDC42/FGG/PTK2/RAC1/SRC/TEK	7
BP	GO:0008202	steroid metabolic process	12/153	331/18670	1.86899E-05	0.000123641	5.70661E-05	BMP2/CAT/CYP19A1/ESR1/FGF1/FGFR1/HSD17B1/KIT/RORA/SULT1A1/VDR/AKR1C3	12
BP	GO:0051767	nitric-oxide synthase biosynthetic process	4/153	20/18670	1.89679E-05	0.000125079	5.77297E-05	GSTP1/JAK2/KDR/STAT1	4
BP	GO:0051769	regulation of nitric-oxide synthase biosynthetic process	4/153	20/18670	1.89679E-05	0.000125079	5.77297E-05	GSTP1/JAK2/KDR/STAT1	4
BP	GO:0010821	regulation of mitochondrion organization	9/153	182/18670	1.94917E-05	0.000128007	5.90812E-05	AKT1/BCL2L1/GSK3B/HGF/HSPA1A/IGF1/KDR/MMP9/MAPK8	9
BP	GO:0000082	G1/S transition of mitotic cell cycle	11/153	279/18670	1.94985E-05	0.000128007	5.90812E-05	AKT1/CDK2/CDK6/CDK7/DHFR/EGFR/EIF4E/MDM2/AURKA/ADAM17/TYMS	11
BP	GO:0031532	actin cytoskeleton reorganization	7/153	101/18670	1.9536E-05	0.000128007	5.90812E-05	ABL1/RHOA/CDC42/HRAS/KIT/PTPN1/TEK	7
BP	GO:1903426	regulation of reactive oxygen species biosynthetic process	7/153	101/18670	1.9536E-05	0.000128007	5.90812E-05	AKT1/RHOA/HSP90AA1/HSP90AB1/INSR/JAK2/RAC1	7
BP	GO:1903364	positive regulation of cellular protein catabolic process	8/153	140/18670	2.02822E-05	0.000132686	6.12409E-05	AKT1/GSK3B/HSPA1A/HSP90AA1/MDM2/PLK1/PTK2/AURKA	8
BP	GO:0002040	sprouting angiogenesis	9/153	183/18670	2.03583E-05	0.000132763	6.12762E-05	ABL1/AKT1/RHOA/EPHA2/EPHB4/FGF1/HMOX1/KDR/TEK	9
BP	GO:0061136	regulation of proteasomal protein catabolic process	9/153	183/18670	2.03583E-05	0.000132763	6.12762E-05	AKT1/FHIT/GSK3B/HSPA1A/HSP90AB1/MDM2/PLK1/PRKACA/AURKA	9
BP	GO:1904018	positive regulation of vasculature development	10/153	230/18670	2.04417E-05	0.000133097	6.14304E-05	ABL1/FGF1/HGF/HMOX1/KDR/KIT/NOS3/SOD2/TEK/TGFBR2	10
BP	GO:0000079	regulation of cyclin-dependent protein serine/threonine kinase activity	7/153	102/18670	2.08328E-05	0.00013543	6.25071E-05	AKT1/CASP3/CDK7/EGFR/PLK1/SRC/ADAM17	7
BP	GO:0097530	granulocyte migration	8/153	141/18670	2.13546E-05	0.000138604	6.3972E-05	MAPK14/LGALS3/PIK3CG/RAC1/S100A9/CCL5/SYK/TGFB2	8
BP	GO:0015909	long-chain fatty acid transport	6/153	69/18670	2.15034E-05	0.00013935	6.43165E-05	AKT1/AKT2/ACE/PLA2G2A/PPARG/SYK	6
BP	GO:0007229	integrin-mediated signaling pathway	7/153	103/18670	2.21999E-05	0.000143413	6.61919E-05	ABL1/CDC42/CTNNA1/PTK2/PTPN11/SRC/SYK	7
BP	GO:0032091	negative regulation of protein binding	7/153	103/18670	2.21999E-05	0.000143413	6.61919E-05	AKT1/ACE/GSK3B/MET/PPARA/MAPK8/AURKA	7
BP	GO:0010675	regulation of cellular carbohydrate metabolic process	8/153	142/18670	2.24742E-05	0.000144733	6.68008E-05	AKT1/AKT2/GSK3B/IGF1/INSR/PPARA/RORA/SRC	8
BP	GO:0034332	adherens junction organization	8/153	142/18670	2.24742E-05	0.000144733	6.68008E-05	ABL1/RHOA/CTNNA1/KDR/PTK2/RAC1/SRC/TEK	8
BP	GO:0045930	negative regulation of mitotic cell cycle	12/153	338/18670	2.29735E-05	0.000147488	6.80724E-05	ABL1/BCL2L1/BMP7/CDK2/CDK6/CHEK1/EGFR/FAP/HRAS/MDM2/PLK1/AURKA	12
BP	GO:0051056	regulation of small GTPase mediated signal transduction	12/153	338/18670	2.29735E-05	0.000147488	6.80724E-05	ABL1/RHOA/CDC42/GRB2/HRAS/IGF1/JAK2/MET/RAC1/RAF1/SRC/TGFB2	12
BP	GO:0070507	regulation of microtubule cytoskeleton organization	9/153	186/18670	2.31573E-05	0.000148437	6.85104E-05	ABL1/RHOA/CHEK1/GSK3B/HSPA1A/MET/PLK1/RAC1/AURKA	9
BP	GO:0060713	labyrinthine layer morphogenesis	4/153	21/18670	2.32818E-05	0.000149004	6.8772E-05	BMP7/FGFR2/GRB2/ST14	4
BP	GO:0014812	muscle cell migration	7/153	104/18670	2.36401E-05	0.000149688	6.90881E-05	ACE/GSTP1/IGF1/MDM2/PLAU/CCL5/SRC	7
BP	GO:0030593	neutrophil chemotaxis	7/153	104/18670	2.36401E-05	0.000149688	6.90881E-05	LGALS3/PIK3CG/RAC1/S100A9/CCL5/SYK/TGFB2	7
BP	GO:0046822	regulation of nucleocytoplasmic transport	7/153	104/18670	2.36401E-05	0.000149688	6.90881E-05	MAPK14/GSK3B/MDM2/PIK3R1/PRKACA/MAPK1/PTPN11	7
BP	GO:0090100	positive regulation of transmembrane receptor protein serine/threonine kinase signaling pathway	7/153	104/18670	2.36401E-05	0.000149688	6.90881E-05	PARP1/BMP2/BMP7/HSP90AB1/ADAM17/TGFB2/TGFBR1	7
BP	GO:0035296	regulation of tube diameter	8/153	143/18670	2.36426E-05	0.000149688	6.90881E-05	AKT1/RHOA/ACE/EGFR/FGG/HMOX1/NOS3/SOD2	8
BP	GO:0050880	regulation of blood vessel size	8/153	143/18670	2.36426E-05	0.000149688	6.90881E-05	AKT1/RHOA/ACE/EGFR/FGG/HMOX1/NOS3/SOD2	8
BP	GO:0097746	regulation of blood vessel diameter	8/153	143/18670	2.36426E-05	0.000149688	6.90881E-05	AKT1/RHOA/ACE/EGFR/FGG/HMOX1/NOS3/SOD2	8
BP	GO:0048588	developmental cell growth	10/153	234/18670	2.37025E-05	0.000149781	6.91307E-05	ABL1/GSK3B/HSP90AA1/HSP90AB1/IGF1/PPARA/RARG/REG1A/AURKA/TGFBR2	10
BP	GO:0051348	negative regulation of transferase activity	11/153	285/18670	2.37298E-05	0.000149781	6.91307E-05	ABL1/AKT1/BMP7/CASP3/GSK3B/GSTP1/IGF1R/PLK1/PPARG/PTPN1/SRC	11
BP	GO:0035150	regulation of tube size	8/153	144/18670	2.48616E-05	0.000156685	7.23174E-05	AKT1/RHOA/ACE/EGFR/FGG/HMOX1/NOS3/SOD2	8
BP	GO:0042531	positive regulation of tyrosine phosphorylation of STAT protein	6/153	71/18670	2.53469E-05	0.000159257	7.35045E-05	ERBB4/IGF1/IL2/JAK2/KIT/CCL5	6
BP	GO:0051057	positive regulation of small GTPase mediated signal transduction	6/153	71/18670	2.53469E-05	0.000159257	7.35045E-05	GRB2/HRAS/IGF1/JAK2/RAC1/SRC	6
BP	GO:0032881	regulation of polysaccharide metabolic process	5/153	43/18670	2.592E-05	0.000162118	7.48249E-05	AKT1/AKT2/GSK3B/IGF1/INSR	5
BP	GO:0045429	positive regulation of nitric oxide biosynthetic process	5/153	43/18670	2.592E-05	0.000162118	7.48249E-05	AKT1/HSP90AA1/HSP90AB1/INSR/JAK2	5
BP	GO:0071364	cellular response to epidermal growth factor stimulus	5/153	43/18670	2.592E-05	0.000162118	7.48249E-05	AKT1/EGFR/ERBB4/GSTP1/PTPN11	5
BP	GO:0048562	embryonic organ morphogenesis	11/153	288/18670	2.61283E-05	0.000163174	7.53122E-05	BMP7/EPHA2/FGFR1/FGFR2/HPN/MAPK1/RARB/RARG/RBP4/TGFBR1/TGFBR2	11
BP	GO:0031669	cellular response to nutrient levels	10/153	237/18670	2.64322E-05	0.000164573	7.59582E-05	ALB/HMOX1/HSPA8/LCN2/MDM2/PPARG/MAPK1/MAPK8/VDR/AKR1C3	10
BP	GO:0043122	regulation of I-kappaB kinase/NF-kappaB signaling	10/153	237/18670	2.64322E-05	0.000164573	7.59582E-05	ABL1/AKT1/RHOA/CASP1/ESR1/GSTP1/HMOX1/RORA/STAT1/TGM2	10
BP	GO:1904892	regulation of STAT cascade	8/153	146/18670	2.7458E-05	0.000170703	7.87873E-05	ERBB4/F2/IGF1/IL2/JAK2/JAK3/KIT/CCL5	8
BP	GO:0001759	organ induction	4/153	22/18670	2.82745E-05	0.000175251	8.08865E-05	AR/BMP2/FGF1/FGFR1	4
BP	GO:0031281	positive regulation of cyclase activity	4/153	22/18670	2.82745E-05	0.000175251	8.08865E-05	MAPK14/NOS2/NOS3/MAPK8	4
BP	GO:0051341	regulation of oxidoreductase activity	7/153	107/18670	2.84302E-05	0.000175952	8.12098E-05	ABL1/AKT1/DHFR/EGFR/HSP90AA1/NOS3/VDR	7
BP	GO:0034105	positive regulation of tissue remodeling	5/153	44/18670	2.90509E-05	0.000178989	8.26115E-05	CA2/EGFR/IL2/SYK/VDR	5
BP	GO:0060412	ventricular septum morphogenesis	5/153	44/18670	2.90509E-05	0.000178989	8.26115E-05	FGFR2/NOS3/TGFB2/TGFBR1/TGFBR2	5
BP	GO:1904407	positive regulation of nitric oxide metabolic process	5/153	44/18670	2.90509E-05	0.000178989	8.26115E-05	AKT1/HSP90AA1/HSP90AB1/INSR/JAK2	5
BP	GO:0005996	monosaccharide metabolic process	11/153	292/18670	2.96508E-05	0.000182412	8.41917E-05	AKT1/AKT2/ALDOA/MAPK14/GSK3B/IGF1/INSR/PPARA/RBP4/RORA/SRC	11
BP	GO:0060350	endochondral bone morphogenesis	6/153	73/18670	2.97246E-05	0.000182594	8.42757E-05	MMP13/RARA/RARB/RARG/TEK/TGFBR2	6
BP	GO:0032526	response to retinoic acid	7/153	108/18670	3.01939E-05	0.000184927	8.53522E-05	FGFR2/PPARG/RARA/RARB/RARG/RBP4/RXRB	7
BP	GO:0071156	regulation of cell cycle arrest	7/153	108/18670	3.01939E-05	0.000184927	8.53522E-05	AKT2/CDK2/FAP/HSP90AB1/MDM2/PRKACA/AURKA	7
BP	GO:0008643	carbohydrate transport	8/153	148/18670	3.02779E-05	0.000185166	8.54627E-05	AKT1/AKT2/BRAF/MAPK14/IGF1/INSR/PIK3R1/PTPN11	8
BP	GO:0042593	glucose homeostasis	10/153	241/18670	3.04882E-05	0.000186176	8.5929E-05	AKT1/IGF1R/INSR/PIK3R1/PPARG/PRKACA/PTPN11/RAC1/RAF1/RBP4	10
BP	GO:0033500	carbohydrate homeostasis	10/153	242/18670	3.15817E-05	0.000192569	8.88796E-05	AKT1/IGF1R/INSR/PIK3R1/PPARG/PRKACA/PTPN11/RAC1/RAF1/RBP4	10
BP	GO:0051149	positive regulation of muscle cell differentiation	7/153	109/18670	3.20467E-05	0.000195116	9.00553E-05	ABL1/CDC42/MAPK14/CTNNA1/IGF1/KIT/SOD2	7
BP	GO:0048538	thymus development	5/153	45/18670	3.24676E-05	0.000197388	9.11036E-05	ABL1/MAPK1/MAP2K1/RAF1/TGFBR1	5
BP	GO:0008360	regulation of cell shape	8/153	150/18670	3.33362E-05	0.000202073	9.3266E-05	ALDOA/RHOA/CDC42/F2/HPN/KDR/KIT/PTK2	8
BP	GO:0050777	negative regulation of immune response	8/153	150/18670	3.33362E-05	0.000202073	9.3266E-05	HMOX1/IL2/JAK3/LGALS3/MMP12/PPARG/TGFB2/NR1H2	8
BP	GO:0007517	muscle organ development	13/153	410/18670	3.39612E-05	0.00020555	9.48709E-05	RHOA/BMP2/MAPK14/ERBB4/FGFR1/FGFR2/IGF1/PPARA/MAPK1/RBP4/TGFB2/TGFBR1/TGFBR2	13
BP	GO:0051882	mitochondrial depolarization	4/153	23/18670	3.40094E-05	0.00020555	9.48709E-05	ABL1/PARP1/KDR/SRC	4
BP	GO:0003281	ventricular septum development	6/153	75/18670	3.46903E-05	0.000209054	9.64879E-05	FGFR2/MDM2/NOS3/TGFB2/TGFBR1/TGFBR2	6
BP	GO:1903201	regulation of oxidative stress-induced cell death	6/153	75/18670	3.46903E-05	0.000209054	9.64879E-05	PARP1/AKT1/HGF/MET/MMP3/SOD2	6
BP	GO:0002685	regulation of leukocyte migration	9/153	196/18670	3.49702E-05	0.000210433	9.71245E-05	AKT1/RHOA/MAPK14/CYP19A1/HMOX1/LGALS3/RAC1/CCL5/ADAM17	9
BP	GO:0044843	cell cycle G1/S phase transition	11/153	298/18670	3.57021E-05	0.000214524	9.90128E-05	AKT1/CDK2/CDK6/CDK7/DHFR/EGFR/EIF4E/MDM2/AURKA/ADAM17/TYMS	11
BP	GO:0001505	regulation of neurotransmitter levels	12/153	354/18670	3.61036E-05	0.000216184	9.97791E-05	AKT1/NQO1/GSK3B/HSPA8/HSP90AA1/HSP90AB1/INSR/JAK2/NOS2/NOS3/RAC1/RORA	12
BP	GO:0005978	glycogen biosynthetic process	5/153	46/18670	3.61878E-05	0.000216184	9.97791E-05	AKT1/AKT2/GSK3B/IGF1/INSR	5
BP	GO:0009250	glucan biosynthetic process	5/153	46/18670	3.61878E-05	0.000216184	9.97791E-05	AKT1/AKT2/GSK3B/IGF1/INSR	5
BP	GO:1904036	negative regulation of epithelial cell apoptotic process	5/153	46/18670	3.61878E-05	0.000216184	9.97791E-05	ABL1/FGG/HMOX1/KDR/TEK	5
BP	GO:0050769	positive regulation of neurogenesis	14/153	474/18670	3.6581E-05	0.000218217	0.000100717	RHOA/BMP2/BMP7/FGFR1/HGF/IL2/KIT/MME/PPARG/MAP2K1/RARA/RARB/REG1A/S100A9	14
BP	GO:0050729	positive regulation of inflammatory response	8/153	153/18670	3.84055E-05	0.000228112	0.000105284	BTK/EGFR/IL2/JAK2/PIK3CG/PLA2G2A/S100A9/TGM2	8
BP	GO:0051017	actin filament bundle assembly	8/153	153/18670	3.84055E-05	0.000228112	0.000105284	ABL1/RHOA/CDC42/MET/PIK3R1/RAC1/SRC/TGFBR1	8
BP	GO:0090316	positive regulation of intracellular protein transport	8/153	153/18670	3.84055E-05	0.000228112	0.000105284	AKT2/MAPK14/GSK3B/HRAS/MDM2/PIK3R1/PRKACA/MAPK1	8
BP	GO:0034341	response to interferon-gamma	9/153	199/18670	3.93806E-05	0.000233232	0.000107648	CASP1/DAPK1/HSP90AB1/JAK2/NOS2/PPARG/CCL5/STAT1/NR1H2	9
BP	GO:0050866	negative regulation of cell activation	9/153	199/18670	3.93806E-05	0.000233232	0.000107648	BTK/CASP3/F2/FGG/HMOX1/IL2/JAK3/LGALS3/NOS3	9
BP	GO:0043303	mast cell degranulation	5/153	47/18670	4.023E-05	0.000236566	0.000109186	BTK/HMOX1/KIT/PIK3CG/SYK	5
BP	GO:0048806	genitalia development	5/153	47/18670	4.023E-05	0.000236566	0.000109186	AR/CYP19A1/ESR1/PTPN11/RBP4	5
BP	GO:0060351	cartilage development involved in endochondral bone morphogenesis	5/153	47/18670	4.023E-05	0.000236566	0.000109186	MMP13/RARA/RARB/RARG/TGFBR2	5
BP	GO:0061614	pri-miRNA transcription by RNA polymerase II	5/153	47/18670	4.023E-05	0.000236566	0.000109186	BMP2/NR3C1/PPARA/PPARG/TGFB2	5
BP	GO:2001239	regulation of extrinsic apoptotic signaling pathway in absence of ligand	5/153	47/18670	4.023E-05	0.000236566	0.000109186	AKT1/BCL2L1/CTNNA1/FGFR1/HSPA1A	5
BP	GO:0003181	atrioventricular valve morphogenesis	4/153	24/18670	4.05518E-05	0.000237443	0.000109591	BMP2/MDM2/TGFB2/TGFBR2	4
BP	GO:0003272	endocardial cushion formation	4/153	24/18670	4.05518E-05	0.000237443	0.000109591	BMP7/TGFB2/TGFBR1/TGFBR2	4
BP	GO:2001026	regulation of endothelial cell chemotaxis	4/153	24/18670	4.05518E-05	0.000237443	0.000109591	FGF1/FGFR1/KDR/MET	4
BP	GO:0060349	bone morphogenesis	7/153	114/18670	4.27706E-05	0.000250081	0.000115424	FGFR2/MMP13/RARA/RARB/RARG/TEK/TGFBR2	7
BP	GO:0042129	regulation of T cell proliferation	8/153	156/18670	4.41034E-05	0.000257509	0.000118852	CASP3/IGF1/IL2/JAK3/LGALS3/CCL5/SYK/TGFBR2	8
BP	GO:0002279	mast cell activation involved in immune response	5/153	48/18670	4.4613E-05	0.000259384	0.000119718	BTK/HMOX1/KIT/PIK3CG/SYK	5
BP	GO:0051972	regulation of telomerase activity	5/153	48/18670	4.4613E-05	0.000259384	0.000119718	HSP90AA1/HSP90AB1/PPARG/MAPK1/SRC	5
BP	GO:0090199	regulation of release of cytochrome c from mitochondria	5/153	48/18670	4.4613E-05	0.000259384	0.000119718	AKT1/BCL2L1/HGF/IGF1/MMP9	5
BP	GO:0061572	actin filament bundle organization	8/153	157/18670	4.61526E-05	0.000267582	0.000123501	ABL1/RHOA/CDC42/MET/PIK3R1/RAC1/SRC/TGFBR1	8
BP	GO:1905952	regulation of lipid localization	8/153	157/18670	4.61526E-05	0.000267582	0.000123501	AKT1/AKT2/CYP19A1/PPARA/PPARG/PTPN11/SYK/NR1H2	8
BP	GO:0003151	outflow tract morphogenesis	6/153	79/18670	4.66166E-05	0.000269892	0.000124568	BMP7/FGFR2/RARA/RARB/TGFB2/TGFBR2	6
BP	GO:0006066	alcohol metabolic process	12/153	364/18670	4.72724E-05	0.000273306	0.000126143	ADH1C/ALDH2/BMP2/CAT/DHFR/FGF1/FGFR1/IGF1/RBP4/SULT1A1/VDR/AKR1C3	12
BP	GO:0031396	regulation of protein ubiquitination	9/153	204/18670	4.77765E-05	0.000275022	0.000126936	ABL1/AKT1/XIAP/HSPA1A/HSP90AA1/HSP90AB1/PLK1/TGFBR1/BIRC7	9
BP	GO:0007569	cell aging	7/153	116/18670	4.78113E-05	0.000275022	0.000126936	ABL1/CDK6/CHEK1/MAPK14/HRAS/MME/MAP2K1	7
BP	GO:0002053	positive regulation of mesenchymal cell proliferation	4/153	25/18670	4.7969E-05	0.000275022	0.000126936	FGFR1/FGFR2/STAT1/TGFBR2	4
BP	GO:0048103	somatic stem cell division	4/153	25/18670	4.7969E-05	0.000275022	0.000126936	FGFR1/FGFR2/KIT/TGFB2	4
BP	GO:0051894	positive regulation of focal adhesion assembly	4/153	25/18670	4.7969E-05	0.000275022	0.000126936	ABL1/KDR/RAC1/TEK	4
BP	GO:0060571	morphogenesis of an epithelial fold	4/153	25/18670	4.7969E-05	0.000275022	0.000126936	AR/BMP7/EGFR/FGFR2	4
BP	GO:0043467	regulation of generation of precursor metabolites and energy	8/153	158/18670	4.82808E-05	0.000276426	0.000127583	AKT1/AKT2/RHOA/GSK3B/IGF1/INSR/NOS2/PPARA	8
BP	GO:0006869	lipid transport	12/153	365/18670	4.85385E-05	0.000277517	0.000128087	AKT1/AKT2/CYP19A1/ACE/NOS2/PLA2G2A/PPARA/PPARG/PTPN11/RBP4/SYK/NR1H2	12
BP	GO:0002448	mast cell mediated immunity	5/153	49/18670	4.93565E-05	0.000281414	0.000129886	BTK/HMOX1/KIT/PIK3CG/SYK	5
BP	GO:0003044	regulation of systemic arterial blood pressure mediated by a chemical signal	5/153	49/18670	4.93565E-05	0.000281414	0.000129886	RHOA/ACE/MME/NOS3/SOD2	5
BP	GO:0048863	stem cell differentiation	10/153	257/18670	5.24938E-05	0.000298889	0.000137951	ABL1/BMP7/CDK6/ACE/ERBB4/ESR1/FGFR2/KIT/MAPK1/TGFB2	10
BP	GO:1990266	neutrophil migration	7/153	118/18670	5.33289E-05	0.000303226	0.000139953	LGALS3/PIK3CG/RAC1/S100A9/CCL5/SYK/TGFB2	7
BP	GO:0034284	response to monosaccharide	9/153	207/18670	5.3505E-05	0.000303808	0.000140222	RHOA/CASP3/CAT/GSTP1/IGF1R/PRKACA/RAC1/RAF1/TGFBR2	9
BP	GO:0032436	positive regulation of proteasomal ubiquitin-dependent protein catabolic process	6/153	81/18670	5.37011E-05	0.000304503	0.000140542	AKT1/GSK3B/HSPA1A/MDM2/PLK1/AURKA	6
BP	GO:0010718	positive regulation of epithelial to mesenchymal transition	5/153	50/18670	5.44806E-05	0.000308499	0.000142387	BMP2/BMP7/TGFB2/TGFBR1/TGFBR2	5
BP	GO:0050670	regulation of lymphocyte proliferation	9/153	208/18670	5.55389E-05	0.000314061	0.000144954	BTK/CASP3/IGF1/IL2/JAK3/LGALS3/CCL5/SYK/TGFBR2	9
BP	GO:0003171	atrioventricular valve development	4/153	26/18670	5.63304E-05	0.000317666	0.000146618	BMP2/MDM2/TGFB2/TGFBR2	4
BP	GO:0060669	embryonic placenta morphogenesis	4/153	26/18670	5.63304E-05	0.000317666	0.000146618	BMP7/FGFR2/GRB2/ST14	4
BP	GO:0015718	monocarboxylic acid transport	8/153	162/18670	5.76299E-05	0.000324152	0.000149611	AKT1/AKT2/ACE/NOS2/PLA2G2A/PPARA/PPARG/SYK	8
BP	GO:0032944	regulation of mononuclear cell proliferation	9/153	209/18670	5.76376E-05	0.000324152	0.000149611	BTK/CASP3/IGF1/IL2/JAK3/LGALS3/CCL5/SYK/TGFBR2	9
BP	GO:1903052	positive regulation of proteolysis involved in cellular protein catabolic process	7/153	120/18670	5.93575E-05	0.000333371	0.000153866	AKT1/GSK3B/HSPA1A/MDM2/PLK1/PTK2/AURKA	7
BP	GO:0007163	establishment or maintenance of cell polarity	9/153	210/18670	5.98028E-05	0.000335416	0.00015481	RHOA/CDC42/CTNNA1/GSK3B/HSP90AA1/HSP90AB1/PLK1/PTK2/TEK	9
BP	GO:0050999	regulation of nitric-oxide synthase activity	5/153	51/18670	6.0006E-05	0.000335643	0.000154915	AKT1/DHFR/EGFR/HSP90AA1/NOS3	5
BP	GO:0051496	positive regulation of stress fiber assembly	5/153	51/18670	6.0006E-05	0.000335643	0.000154915	ABL1/RHOA/CDC42/RAC1/TGFBR1	5
BP	GO:0042509	regulation of tyrosine phosphorylation of STAT protein	6/153	83/18670	6.16216E-05	0.000343285	0.000158442	ERBB4/IGF1/IL2/JAK2/KIT/CCL5	6
BP	GO:0045913	positive regulation of carbohydrate metabolic process	6/153	83/18670	6.16216E-05	0.000343285	0.000158442	AKT1/AKT2/IGF1/INSR/PPARA/SRC	6
BP	GO:0048145	regulation of fibroblast proliferation	6/153	83/18670	6.16216E-05	0.000343285	0.000158442	CDK6/EGFR/ESR1/GSTP1/IGF1/PPARG	6
BP	GO:0003149	membranous septum morphogenesis	3/153	10/18670	6.20831E-05	0.000344925	0.000159199	FGFR2/TGFB2/TGFBR2	3
BP	GO:1903265	positive regulation of tumor necrosis factor-mediated signaling pathway	3/153	10/18670	6.20831E-05	0.000344925	0.000159199	CASP1/HSPA1A/ADAM17	3
BP	GO:0001704	formation of primary germ layer	7/153	121/18670	6.25745E-05	0.000347187	0.000160243	BMP7/EPHA2/FGFR1/FGFR2/MMP2/MMP9/PRKACA	7
BP	GO:0009123	nucleoside monophosphate metabolic process	12/153	375/18670	6.29066E-05	0.000348562	0.000160877	PARP1/ALDOA/RHOA/HSPA1A/HSPA8/IGF1/IMPDH1/INSR/PPARA/TYMS/UMPS/GMPR2	12
BP	GO:0050804	modulation of chemical synaptic transmission	13/153	436/18670	6.36812E-05	0.000352381	0.00016264	ABL1/CA2/EGFR/EIF4E/GSK3B/HRAS/JAK2/KIT/MME/PRKACA/MAPK1/RARA/SRC	13
BP	GO:0099177	regulation of trans-synaptic signaling	13/153	437/18670	6.51754E-05	0.000360166	0.000166233	ABL1/CA2/EGFR/EIF4E/GSK3B/HRAS/JAK2/KIT/MME/PRKACA/MAPK1/RARA/SRC	13
BP	GO:0048144	fibroblast proliferation	6/153	84/18670	6.59173E-05	0.000362527	0.000167323	CDK6/EGFR/ESR1/GSTP1/IGF1/PPARG	6
BP	GO:0050886	endocrine process	6/153	84/18670	6.59173E-05	0.000362527	0.000167323	RHOA/ACE/FGFR1/MME/NOS3/PTPN11	6
BP	GO:0003179	heart valve morphogenesis	5/153	52/18670	6.59539E-05	0.000362527	0.000167323	BMP2/MDM2/NOS3/TGFB2/TGFBR2	5
BP	GO:1900024	regulation of substrate adhesion-dependent cell spreading	5/153	52/18670	6.59539E-05	0.000362527	0.000167323	ABL1/CDC42/FGG/PTK2/RAC1	5
BP	GO:0007254	JNK cascade	9/153	214/18670	6.91629E-05	0.000379156	0.000174998	AKT1/EGFR/GSTP1/HRAS/IGF1R/MAPK8/PTPN1/SYK/BIRC7	9
BP	GO:0045732	positive regulation of protein catabolic process	9/153	214/18670	6.91629E-05	0.000379156	0.000174998	AKT1/CSNK2A1/GSK3B/HSPA1A/HSP90AA1/MDM2/PLK1/PTK2/AURKA	9
BP	GO:0002062	chondrocyte differentiation	7/153	123/18670	6.94367E-05	0.000380152	0.000175458	BMP2/MAPK14/FGFR1/RARB/RARG/TGFBR1/TGFBR2	7
BP	GO:0032388	positive regulation of intracellular transport	9/153	215/18670	7.16865E-05	0.000391949	0.000180903	AKT2/MAPK14/GSK3B/HRAS/MDM2/PIK3R1/PRKACA/MAPK1/SYK	9
BP	GO:0000186	activation of MAPKK activity	5/153	53/18670	7.23464E-05	0.000395034	0.000182327	EGFR/JAK2/MAPK1/RAF1/TGFBR1	5
BP	GO:0051101	regulation of DNA binding	7/153	124/18670	7.30914E-05	0.000398575	0.000183961	PARP1/HMOX1/IGF1/JAK2/MMP9/PPARG/MAPK8	7
BP	GO:0000075	cell cycle checkpoint	9/153	216/18670	7.42872E-05	0.000404561	0.000186724	BCL2L1/CDK2/CHEK1/MAPK14/HRAS/MDM2/PLK1/PTPN11/AURKA	9
BP	GO:0001776	leukocyte homeostasis	6/153	86/18670	7.52253E-05	0.000408592	0.000188584	ABL1/AKT1/CASP3/IL2/JAK3/ADAM17	6
BP	GO:0042058	regulation of epidermal growth factor receptor signaling pathway	6/153	86/18670	7.52253E-05	0.000408592	0.000188584	AKT1/CDC42/EGFR/GRB2/MMP9/ADAM17	6
BP	GO:0033688	regulation of osteoblast proliferation	4/153	28/18670	7.61709E-05	0.000413185	0.000190704	ABL1/RHOA/BMP2/FGFR2	4
BP	GO:0006805	xenobiotic metabolic process	7/153	125/18670	7.69018E-05	0.000416602	0.000192281	NQO1/GSTM1/GSTP1/HSP90AB1/NQO2/RORA/SULT1A1	7
BP	GO:0038095	Fc-epsilon receptor signaling pathway	8/153	169/18670	7.76103E-05	0.000419339	0.000193545	BTK/GRB2/ITK/PIK3R1/MAPK1/MAPK8/RAC1/SYK	8
BP	GO:0045619	regulation of lymphocyte differentiation	8/153	169/18670	7.76103E-05	0.000419339	0.000193545	ABL1/RHOA/BTK/IL2/JAK3/RARA/SYK/TGFBR2	8
BP	GO:0032886	regulation of microtubule-based process	9/153	218/18670	7.97274E-05	0.000430215	0.000198564	ABL1/RHOA/CHEK1/GSK3B/HSPA1A/MET/PLK1/RAC1/AURKA	9
BP	GO:0045844	positive regulation of striated muscle tissue development	6/153	87/18670	8.02565E-05	0.000431379	0.000199101	MAPK14/ERBB4/FGFR1/FGFR2/IGF1/MAPK1	6
BP	GO:0048636	positive regulation of muscle organ development	6/153	87/18670	8.02565E-05	0.000431379	0.000199101	MAPK14/ERBB4/FGFR1/FGFR2/IGF1/MAPK1	6
BP	GO:0051781	positive regulation of cell division	6/153	87/18670	8.02565E-05	0.000431379	0.000199101	RHOA/CAT/CDC42/FGF1/FGFR2/TGFB2	6
BP	GO:0007265	Ras protein signal transduction	13/153	448/18670	8.37343E-05	0.000449487	0.000207459	ABL1/RHOA/CDC42/CDK2/MAPK14/GRB2/HRAS/IGF1/JAK2/MET/RAC1/RAF1/TGFB2	13
BP	GO:0060439	trachea morphogenesis	3/153	11/18670	8.48511E-05	0.00045489	0.000209953	MAPK1/MAP2K1/TGFBR2	3
BP	GO:0034103	regulation of tissue remodeling	6/153	88/18670	8.55524E-05	0.000457462	0.00021114	CA2/EGFR/IL2/SRC/SYK/VDR	6
BP	GO:1901863	positive regulation of muscle tissue development	6/153	88/18670	8.55524E-05	0.000457462	0.00021114	MAPK14/ERBB4/FGFR1/FGFR2/IGF1/MAPK1	6
BP	GO:0001541	ovarian follicle development	5/153	55/18670	8.65548E-05	0.000460436	0.000212512	BCL2L1/CTNNA1/ESR1/KIT/SRC	5
BP	GO:0010823	negative regulation of mitochondrion organization	5/153	55/18670	8.65548E-05	0.000460436	0.000212512	AKT1/BCL2L1/HGF/HSPA1A/IGF1	5
BP	GO:0043551	regulation of phosphatidylinositol 3-kinase activity	5/153	55/18670	8.65548E-05	0.000460436	0.000212512	KIT/PIK3R1/PTK2/SRC/TEK	5
BP	GO:0061098	positive regulation of protein tyrosine kinase activity	5/153	55/18670	8.65548E-05	0.000460436	0.000212512	ACE/PTPN1/CCL5/SRC/ADAM17	5
BP	GO:0051235	maintenance of location	11/153	330/18670	8.93092E-05	0.000474477	0.000218993	ABL1/AKT1/ALB/ANXA5/F2/LCN2/PPARA/PPARG/PRKACA/S100A9/NR1H2	11
BP	GO:0032602	chemokine production	6/153	89/18670	9.11229E-05	0.00048349	0.000223153	EPHA2/GSTP1/HMOX1/S100A9/SYK/ADAM17	6
BP	GO:1903078	positive regulation of protein localization to plasma membrane	5/153	56/18670	9.44173E-05	0.000500327	0.000230924	AKT1/EGFR/EPHA2/LGALS3/PIK3R1	5
BP	GO:0007411	axon guidance	10/153	276/18670	9.50226E-05	0.000502889	0.000232106	BMP7/EPHA2/EPHB4/GRB2/PIK3R1/MAPK1/PTK2/PTPN11/RAC1/SRC	10
BP	GO:0010717	regulation of epithelial to mesenchymal transition	6/153	90/18670	9.69782E-05	0.000511926	0.000236277	BMP2/BMP7/HPN/TGFB2/TGFBR1/TGFBR2	6
BP	GO:0046849	bone remodeling	6/153	90/18670	9.69782E-05	0.000511926	0.000236277	CA2/EGFR/EPHA2/RAC1/SRC/SYK	6
BP	GO:0097485	neuron projection guidance	10/153	277/18670	9.78983E-05	0.000516123	0.000238215	BMP7/EPHA2/EPHB4/GRB2/PIK3R1/MAPK1/PTK2/PTPN11/RAC1/SRC	10
BP	GO:0010743	regulation of macrophage derived foam cell differentiation	4/153	30/18670	0.000100661	0.000528663	0.000244002	PLA2G2A/PPARA/PPARG/NR1H2	4
BP	GO:0046320	regulation of fatty acid oxidation	4/153	30/18670	0.000100661	0.000528663	0.000244002	AKT1/AKT2/PPARA/PPARG	4
BP	GO:0061037	negative regulation of cartilage development	4/153	30/18670	0.000100661	0.000528663	0.000244002	RARA/RARB/RARG/TGFBR1	4
BP	GO:0042743	hydrogen peroxide metabolic process	5/153	57/18670	0.000102817	0.000537253	0.000247967	CAT/EGFR/MMP3/RAC1/PRDX5	5
BP	GO:0043525	positive regulation of neuron apoptotic process	5/153	57/18670	0.000102817	0.000537253	0.000247967	RHOA/CASP3/NQO1/NQO2/TGFB2	5
BP	GO:0048008	platelet-derived growth factor receptor signaling pathway	5/153	57/18670	0.000102817	0.000537253	0.000247967	ABL1/JAK2/PTPN1/PTPN11/SRC	5
BP	GO:1903428	positive regulation of reactive oxygen species biosynthetic process	5/153	57/18670	0.000102817	0.000537253	0.000247967	AKT1/HSP90AA1/HSP90AB1/INSR/JAK2	5
BP	GO:0030183	B cell differentiation	7/153	131/18670	0.000103319	0.000539193	0.000248863	ABL1/BTK/JAK3/KIT/PIK3R1/SYK/ADAM17	7
BP	GO:0002697	regulation of immune effector process	13/153	458/18670	0.000104422	0.00054426	0.000251201	BTK/MAPK14/F2/HMOX1/IL2/JAK3/LGALS3/MMP12/RARA/RBP4/STAT1/SYK/TGFB2	13
BP	GO:0048469	cell maturation	8/153	177/18670	0.000107171	0.000557883	0.000257489	BTK/FGFR1/FGG/PGR/PPARG/PRKACA/AURKA/TYMS	8
BP	GO:0042552	myelination	7/153	132/18670	0.000108365	0.000563389	0.00026003	AKT1/AKT2/TYMP/HGF/RARA/RARB/RARG	7
BP	GO:0001894	tissue homeostasis	9/153	227/18670	0.000108542	0.000563599	0.000260127	ALB/CA2/EGFR/NOS3/PTPN11/RAC1/RBP4/SRC/SYK	9
BP	GO:0017001	antibiotic catabolic process	5/153	58/18670	0.000111779	0.000577504	0.000266545	ALDH2/CAT/SULT1A1/AKR1C3/PRDX5	5
BP	GO:0019229	regulation of vasoconstriction	5/153	58/18670	0.000111779	0.000577504	0.000266545	AKT1/RHOA/ACE/EGFR/FGG	5
BP	GO:0030520	intracellular estrogen receptor signaling pathway	5/153	58/18670	0.000111779	0.000577504	0.000266545	PARP1/AR/ESR1/ESR2/SRC	5
BP	GO:0031663	lipopolysaccharide-mediated signaling pathway	5/153	58/18670	0.000111779	0.000577504	0.000266545	AKT1/MAPK14/NOS3/MAPK1/CCL5	5
BP	GO:0038110	interleukin-2-mediated signaling pathway	3/153	12/18670	0.000112455	0.000578099	0.00026682	IL2/JAK3/SYK	3
BP	GO:0060442	branching involved in prostate gland morphogenesis	3/153	12/18670	0.000112455	0.000578099	0.00026682	BMP7/ESR1/FGFR2	3
BP	GO:0060670	branching involved in labyrinthine layer morphogenesis	3/153	12/18670	0.000112455	0.000578099	0.00026682	FGFR2/GRB2/ST14	3
BP	GO:1902337	regulation of apoptotic process involved in morphogenesis	3/153	12/18670	0.000112455	0.000578099	0.00026682	BMP7/TGFB2/VDR	3
BP	GO:0010543	regulation of platelet activation	4/153	31/18670	0.00011484	0.000586709	0.000270793	F2/FGG/NOS3/SYK	4
BP	GO:0033687	osteoblast proliferation	4/153	31/18670	0.00011484	0.000586709	0.000270793	ABL1/RHOA/BMP2/FGFR2	4
BP	GO:0035767	endothelial cell chemotaxis	4/153	31/18670	0.00011484	0.000586709	0.000270793	FGF1/FGFR1/KDR/MET	4
BP	GO:0045737	positive regulation of cyclin-dependent protein serine/threonine kinase activity	4/153	31/18670	0.00011484	0.000586709	0.000270793	AKT1/EGFR/SRC/ADAM17	4
BP	GO:1903393	positive regulation of adherens junction organization	4/153	31/18670	0.00011484	0.000586709	0.000270793	ABL1/KDR/RAC1/TEK	4
BP	GO:0010876	lipid localization	12/153	400/18670	0.000115867	0.00059122	0.000272875	AKT1/AKT2/CYP19A1/ACE/NOS2/PLA2G2A/PPARA/PPARG/PTPN11/RBP4/SYK/NR1H2	12
BP	GO:0003073	regulation of systemic arterial blood pressure	6/153	93/18670	0.00011636	0.000591543	0.000273024	AR/RHOA/ACE/MME/NOS3/SOD2	6
BP	GO:0046634	regulation of alpha-beta T cell activation	6/153	93/18670	0.00011636	0.000591543	0.000273024	RHOA/IL2/JAK3/RARA/SYK/TGFBR2	6
BP	GO:1901184	regulation of ERBB signaling pathway	6/153	93/18670	0.00011636	0.000591543	0.000273024	AKT1/CDC42/EGFR/GRB2/MMP9/ADAM17	6
BP	GO:0008544	epidermis development	13/153	464/18670	0.000118848	0.000603033	0.000278328	CASP3/CTSL/EGFR/EPHA2/FGFR1/FGFR2/INSR/PPARA/MAP2K1/ST14/TGFB2/VDR/AKR1C3	13
BP	GO:0007272	ensheathment of neurons	7/153	134/18670	0.000119058	0.000603033	0.000278328	AKT1/AKT2/TYMP/HGF/RARA/RARB/RARG	7
BP	GO:0008366	axon ensheathment	7/153	134/18670	0.000119058	0.000603033	0.000278328	AKT1/AKT2/TYMP/HGF/RARA/RARB/RARG	7
BP	GO:0009743	response to carbohydrate	9/153	230/18670	0.000119901	0.000606556	0.000279954	RHOA/CASP3/CAT/GSTP1/IGF1R/PRKACA/RAC1/RAF1/TGFBR2	9
BP	GO:0031102	neuron projection regeneration	5/153	59/18670	0.000121329	0.000611533	0.000282251	CTNNA1/DHFR/HGF/JAK2/MAP2K1	5
BP	GO:0043388	positive regulation of DNA binding	5/153	59/18670	0.000121329	0.000611533	0.000282251	PARP1/IGF1/JAK2/MMP9/PPARG	5
BP	GO:2000351	regulation of endothelial cell apoptotic process	5/153	59/18670	0.000121329	0.000611533	0.000282251	ABL1/FGG/KDR/TEK/AKR1C3	5
BP	GO:0045621	positive regulation of lymphocyte differentiation	6/153	94/18670	0.000123462	0.000621524	0.000286862	RHOA/BTK/IL2/RARA/SYK/TGFBR2	6
BP	GO:1903320	regulation of protein modification by small protein conjugation or removal	9/153	231/18670	0.000123901	0.000622977	0.000287533	ABL1/AKT1/XIAP/HSPA1A/HSP90AA1/HSP90AB1/PLK1/TGFBR1/BIRC7	9
BP	GO:0007498	mesoderm development	7/153	135/18670	0.000124717	0.000624798	0.000288373	BMP7/BTK/EPHA2/FGFR1/FGFR2/JAK2/PRKACA	7
BP	GO:0030010	establishment of cell polarity	7/153	135/18670	0.000124717	0.000624798	0.000288373	RHOA/CDC42/GSK3B/HSP90AA1/HSP90AB1/PLK1/PTK2	7
BP	GO:0050921	positive regulation of chemotaxis	7/153	135/18670	0.000124717	0.000624798	0.000288373	MAPK14/FGFR1/KDR/MET/RAC1/CCL5/ADAM17	7
BP	GO:0010565	regulation of cellular ketone metabolic process	8/153	181/18670	0.000125125	0.000626079	0.000288964	AKT1/AKT2/BMP2/NQO1/PPARA/PPARG/NR1H2/AKR1C3	8
BP	GO:0006913	nucleocytoplasmic transport	11/153	343/18670	0.000125569	0.000627542	0.00028964	AKT1/MAPK14/EIF4E/GSK3B/MDM2/MMP12/PIK3R1/PRKACA/MAPK1/PTPN11/SYK	11
BP	GO:0010721	negative regulation of cell development	11/153	344/18670	0.000128815	0.000642986	0.000296768	RHOA/BMP7/CTNNA1/EIF4E/ERBB4/F2/GSK3B/IGF1/MDM2/PPARA/PTK2	11
BP	GO:0043552	positive regulation of phosphatidylinositol 3-kinase activity	4/153	32/18670	0.000130413	0.000648608	0.000299363	KIT/PTK2/SRC/TEK	4
BP	GO:0045907	positive regulation of vasoconstriction	4/153	32/18670	0.000130413	0.000648608	0.000299363	AKT1/RHOA/EGFR/FGG	4
BP	GO:0060317	cardiac epithelial to mesenchymal transition	4/153	32/18670	0.000130413	0.000648608	0.000299363	BMP2/TGFB2/TGFBR1/TGFBR2	4
BP	GO:0042102	positive regulation of T cell proliferation	6/153	95/18670	0.000130903	0.000650264	0.000300127	IGF1/IL2/JAK3/CCL5/SYK/TGFBR2	6
BP	GO:0045576	mast cell activation	5/153	60/18670	0.000131491	0.000652399	0.000301113	BTK/HMOX1/KIT/PIK3CG/SYK	5
BP	GO:0051169	nuclear transport	11/153	346/18670	0.000135522	0.000671592	0.000309971	AKT1/MAPK14/EIF4E/GSK3B/MDM2/MMP12/PIK3R1/PRKACA/MAPK1/PTPN11/SYK	11
BP	GO:0010660	regulation of muscle cell apoptotic process	6/153	96/18670	0.000138696	0.000685676	0.000316471	BMP7/HMOX1/IGF1/JAK2/PPARG/SOD2	6
BP	GO:0097327	response to antineoplastic agent	6/153	96/18670	0.000138696	0.000685676	0.000316471	CTNNA1/DHFR/EGFR/EIF4E/NR3C1/HMOX1	6
BP	GO:0003170	heart valve development	5/153	61/18670	0.000142293	0.000700103	0.00032313	BMP2/MDM2/NOS3/TGFB2/TGFBR2	5
BP	GO:0010803	regulation of tumor necrosis factor-mediated signaling pathway	5/153	61/18670	0.000142293	0.000700103	0.00032313	CASP1/GSTP1/HSPA1A/SYK/ADAM17	5
BP	GO:0032233	positive regulation of actin filament bundle assembly	5/153	61/18670	0.000142293	0.000700103	0.00032313	ABL1/RHOA/CDC42/RAC1/TGFBR1	5
BP	GO:0071384	cellular response to corticosteroid stimulus	5/153	61/18670	0.000142293	0.000700103	0.00032313	EGFR/EIF4E/NR3C1/GSTP1/AKR1C3	5
BP	GO:0010745	negative regulation of macrophage derived foam cell differentiation	3/153	13/18670	0.000145313	0.000710772	0.000328054	PPARA/PPARG/NR1H2	3
BP	GO:0060601	lateral sprouting from an epithelium	3/153	13/18670	0.000145313	0.000710772	0.000328054	AR/BMP7/FGFR2	3
BP	GO:0071352	cellular response to interleukin-2	3/153	13/18670	0.000145313	0.000710772	0.000328054	IL2/JAK3/SYK	3
BP	GO:1902947	regulation of tau-protein kinase activity	3/153	13/18670	0.000145313	0.000710772	0.000328054	HGF/HSP90AA1/HSP90AB1	3
BP	GO:0007369	gastrulation	8/153	185/18670	0.000145495	0.000710772	0.000328054	BMP7/EPHA2/FGFR1/FGFR2/MMP2/MMP9/PRKACA/TGFBR2	8
BP	GO:0046328	regulation of JNK cascade	8/153	185/18670	0.000145495	0.000710772	0.000328054	AKT1/EGFR/GSTP1/HRAS/IGF1R/PTPN1/SYK/BIRC7	8
BP	GO:0043255	regulation of carbohydrate biosynthetic process	6/153	97/18670	0.000146853	0.000716558	0.000330724	AKT1/AKT2/GSK3B/IGF1/INSR/PPARA	6
BP	GO:0010092	specification of animal organ identity	4/153	33/18670	0.000147459	0.000716976	0.000330918	AR/FGF1/FGFR1/FGFR2	4
BP	GO:0010464	regulation of mesenchymal cell proliferation	4/153	33/18670	0.000147459	0.000716976	0.000330918	FGFR1/FGFR2/STAT1/TGFBR2	4
BP	GO:2000352	negative regulation of endothelial cell apoptotic process	4/153	33/18670	0.000147459	0.000716976	0.000330918	ABL1/FGG/KDR/TEK	4
BP	GO:0002700	regulation of production of molecular mediator of immune response	7/153	139/18670	0.000149583	0.000724741	0.000334501	BTK/MAPK14/HMOX1/IL2/JAK3/RBP4/TGFB2	7
BP	GO:0033135	regulation of peptidyl-serine phosphorylation	7/153	139/18670	0.000149583	0.000724741	0.000334501	AKT1/BRAF/EGFR/HGF/HSP90AA1/HSP90AB1/RAF1	7
BP	GO:0045580	regulation of T cell differentiation	7/153	139/18670	0.000149583	0.000724741	0.000334501	ABL1/RHOA/IL2/JAK3/RARA/SYK/TGFBR2	7
BP	GO:0090287	regulation of cellular response to growth factor stimulus	10/153	292/18670	0.000150737	0.000729475	0.000336687	ABL1/XIAP/FGF1/FGFR1/HSPA1A/HSP90AB1/PTPN1/ADAM17/TGFBR1/TGFBR2	10
BP	GO:0002260	lymphocyte homeostasis	5/153	62/18670	0.000153761	0.000742369	0.000342638	ABL1/AKT1/CASP3/IL2/JAK3	5
BP	GO:0045453	bone resorption	5/153	62/18670	0.000153761	0.000742369	0.000342638	CA2/EGFR/RAC1/SRC/SYK	5
BP	GO:0046578	regulation of Ras protein signal transduction	9/153	238/18670	0.000155157	0.000748234	0.000345344	ABL1/GRB2/HRAS/IGF1/JAK2/MET/RAC1/RAF1/TGFB2	9
BP	GO:0002042	cell migration involved in sprouting angiogenesis	6/153	98/18670	0.000155384	0.000748454	0.000345446	ABL1/AKT1/RHOA/EPHB4/HMOX1/KDR	6
BP	GO:0009161	ribonucleoside monophosphate metabolic process	11/153	354/18670	0.000165411	0.000795825	0.00036731	PARP1/ALDOA/RHOA/HSPA1A/HSPA8/IGF1/IMPDH1/INSR/PPARA/UMPS/GMPR2	11
BP	GO:1904377	positive regulation of protein localization to cell periphery	5/153	63/18670	0.000165922	0.000796165	0.000367467	AKT1/EGFR/EPHA2/LGALS3/PIK3R1	5
BP	GO:0031128	developmental induction	4/153	34/18670	0.000166061	0.000796165	0.000367467	AR/BMP2/FGF1/FGFR1	4
BP	GO:0071402	cellular response to lipoprotein particle stimulus	4/153	34/18670	0.000166061	0.000796165	0.000367467	AKT1/PPARG/SYK/ADAM17	4
BP	GO:1900542	regulation of purine nucleotide metabolic process	7/153	142/18670	0.000170752	0.000817707	0.00037741	PARP1/RHOA/IGF1/INSR/NOS2/NOS3/PPARA	7
BP	GO:0044344	cellular response to fibroblast growth factor stimulus	7/153	143/18670	0.000178324	0.000852978	0.000393689	FGF1/FGFR1/FGFR2/GRB2/MAPK1/PTPN11/CCL5	7
BP	GO:0046579	positive regulation of Ras protein signal transduction	5/153	64/18670	0.000178805	0.000854289	0.000394294	GRB2/HRAS/IGF1/JAK2/RAC1	5
BP	GO:0035791	platelet-derived growth factor receptor-beta signaling pathway	3/153	14/18670	0.000183834	0.000872259	0.000402588	ABL1/PTPN1/SRC	3
BP	GO:0051917	regulation of fibrinolysis	3/153	14/18670	0.000183834	0.000872259	0.000402588	F2/FAP/PLG	3
BP	GO:0060397	JAK-STAT cascade involved in growth hormone signaling pathway	3/153	14/18670	0.000183834	0.000872259	0.000402588	JAK2/JAK3/PTPN1	3
BP	GO:0070669	response to interleukin-2	3/153	14/18670	0.000183834	0.000872259	0.000402588	IL2/JAK3/SYK	3
BP	GO:0071391	cellular response to estrogen stimulus	3/153	14/18670	0.000183834	0.000872259	0.000402588	ESR1/MDM2/RARA	3
BP	GO:1904748	regulation of apoptotic process involved in development	3/153	14/18670	0.000183834	0.000872259	0.000402588	BMP7/TGFB2/VDR	3
BP	GO:1902107	positive regulation of leukocyte differentiation	7/153	144/18670	0.000186165	0.00087991	0.000406119	RHOA/BTK/CA2/IL2/RARA/SYK/TGFBR2	7
BP	GO:0001893	maternal placenta development	4/153	35/18670	0.000186299	0.00087991	0.000406119	AKT1/CTSB/MAPK1/VDR	4
BP	GO:0060338	regulation of type I interferon-mediated signaling pathway	4/153	35/18670	0.000186299	0.00087991	0.000406119	HSP90AB1/MMP12/PTPN1/PTPN11	4
BP	GO:0071312	cellular response to alkaloid	4/153	35/18670	0.000186299	0.00087991	0.000406119	BCL2L1/CASP3/CASP7/MDM2	4
BP	GO:0060389	pathway-restricted SMAD protein phosphorylation	5/153	65/18670	0.000192437	0.000906825	0.000418542	BMP2/BMP7/TGFB2/TGFBR1/TGFBR2	5
BP	GO:0072577	endothelial cell apoptotic process	5/153	65/18670	0.000192437	0.000906825	0.000418542	ABL1/FGG/KDR/TEK/AKR1C3	5
BP	GO:0002367	cytokine production involved in immune response	6/153	102/18670	0.000193511	0.000910848	0.000420398	BTK/MAPK14/HMOX1/JAK3/KIT/TGFB2	6
BP	GO:0000077	DNA damage checkpoint	7/153	145/18670	0.000194282	0.000912398	0.000421114	CDK2/CHEK1/MAPK14/MDM2/PLK1/PTPN11/AURKA	7
BP	GO:0071901	negative regulation of protein serine/threonine kinase activity	7/153	145/18670	0.000194282	0.000912398	0.000421114	ABL1/AKT1/BMP7/CASP3/GSTP1/PLK1/PTPN1	7
BP	GO:0006140	regulation of nucleotide metabolic process	7/153	146/18670	0.000202684	0.000948614	0.000437829	PARP1/RHOA/IGF1/INSR/NOS2/NOS3/PPARA	7
BP	GO:0051384	response to glucocorticoid	7/153	146/18670	0.000202684	0.000948614	0.000437829	RHOA/CASP3/EGFR/EIF4E/NR3C1/GSTP1/TYMS	7
BP	GO:2000241	regulation of reproductive process	7/153	146/18670	0.000202684	0.000948614	0.000437829	AR/BMP7/ESR1/IGF1/INSR/SRC/AURKA	7
BP	GO:1901099	negative regulation of signal transduction in absence of ligand	4/153	36/18670	0.000208257	0.000972495	0.000448851	AKT1/BCL2L1/CTNNA1/HSPA1A	4
BP	GO:2001240	negative regulation of extrinsic apoptotic signaling pathway in absence of ligand	4/153	36/18670	0.000208257	0.000972495	0.000448851	AKT1/BCL2L1/CTNNA1/HSPA1A	4
BP	GO:0042180	cellular ketone metabolic process	9/153	248/18670	0.000211021	0.000981506	0.000453011	AKT1/AKT2/BMP2/CYP19A1/NQO1/PPARA/PPARG/NR1H2/AKR1C3	9
BP	GO:0010212	response to ionizing radiation	7/153	147/18670	0.000211376	0.000981506	0.000453011	PARP1/BCL2L1/CASP3/MAPK14/GRB2/HRAS/MDM2	7
BP	GO:0043524	negative regulation of neuron apoptotic process	7/153	147/18670	0.000211376	0.000981506	0.000453011	RHOA/BCL2L1/HMOX1/HRAS/HSP90AB1/JAK2/SOD2	7
BP	GO:0071236	cellular response to antibiotic	7/153	147/18670	0.000211376	0.000981506	0.000453011	ABL1/NQO1/HGF/LCN2/MDM2/MET/SRC	7
BP	GO:1901657	glycosyl compound metabolic process	7/153	147/18670	0.000211376	0.000981506	0.000453011	RHOA/TYMP/IMPDH1/MTAP/UMPS/AKR1C3/GMPR2	7
BP	GO:1901800	positive regulation of proteasomal protein catabolic process	6/153	104/18670	0.000215157	0.00099794	0.000460596	AKT1/GSK3B/HSPA1A/MDM2/PLK1/AURKA	6
BP	GO:0071897	DNA biosynthetic process	8/153	196/18670	0.000216026	0.001000846	0.000461937	HGF/HSP90AA1/HSP90AB1/PPARG/PPIA/MAPK1/SRC/TYMS	8
BP	GO:2000573	positive regulation of DNA biosynthetic process	5/153	67/18670	0.000222065	0.001027674	0.000474319	HGF/HSP90AA1/HSP90AB1/MAPK1/SRC	5
BP	GO:0002221	pattern recognition receptor signaling pathway	8/153	197/18670	0.000223629	0.001033753	0.000477125	XIAP/BTK/CTSB/CTSL/ESR1/FGG/HSPA1A/S100A9	8
BP	GO:0008593	regulation of Notch signaling pathway	6/153	105/18670	0.000226672	0.00104533	0.000482468	AKT1/BMP7/EGFR/KIT/NOS3/TGFB2	6
BP	GO:0033138	positive regulation of peptidyl-serine phosphorylation	6/153	105/18670	0.000226672	0.00104533	0.000482468	AKT1/BRAF/EGFR/HSP90AA1/HSP90AB1/RAF1	6
BP	GO:0017014	protein nitrosylation	3/153	15/18670	0.000228413	0.00104533	0.000482468	ACE/NOS2/S100A9	3
BP	GO:0018119	peptidyl-cysteine S-nitrosylation	3/153	15/18670	0.000228413	0.00104533	0.000482468	ACE/NOS2/S100A9	3
BP	GO:0034310	primary alcohol catabolic process	3/153	15/18670	0.000228413	0.00104533	0.000482468	ALDH2/SULT1A1/AKR1C3	3
BP	GO:0035635	entry of bacterium into host cell	3/153	15/18670	0.000228413	0.00104533	0.000482468	GRB2/MET/SRC	3
BP	GO:0046321	positive regulation of fatty acid oxidation	3/153	15/18670	0.000228413	0.00104533	0.000482468	AKT2/PPARA/PPARG	3
BP	GO:0051770	positive regulation of nitric-oxide synthase biosynthetic process	3/153	15/18670	0.000228413	0.00104533	0.000482468	JAK2/KDR/STAT1	3
BP	GO:2001028	positive regulation of endothelial cell chemotaxis	3/153	15/18670	0.000228413	0.00104533	0.000482468	FGFR1/KDR/MET	3
BP	GO:0021537	telencephalon development	9/153	251/18670	0.000230722	0.001052505	0.00048578	RHOA/BMP2/CASP3/CDK6/EGFR/ERBB4/GSK3B/RARA/RARB	9
BP	GO:0045637	regulation of myeloid cell differentiation	9/153	251/18670	0.000230722	0.001052505	0.00048578	CA2/CDK6/MAPK14/HSPA1A/LGALS3/PIK3R1/RARA/RARG/STAT1	9
BP	GO:0021587	cerebellum morphogenesis	4/153	37/18670	0.00023202	0.001052505	0.00048578	ABL1/MAP2K1/PTPN11/RORA	4
BP	GO:0034405	response to fluid shear stress	4/153	37/18670	0.00023202	0.001052505	0.00048578	AKT1/CA2/NOS3/SRC	4
BP	GO:0043029	T cell homeostasis	4/153	37/18670	0.00023202	0.001052505	0.00048578	AKT1/CASP3/IL2/JAK3	4
BP	GO:0045923	positive regulation of fatty acid metabolic process	4/153	37/18670	0.00023202	0.001052505	0.00048578	AKT2/PPARA/PPARG/NR1H2	4
BP	GO:1900026	positive regulation of substrate adhesion-dependent cell spreading	4/153	37/18670	0.00023202	0.001052505	0.00048578	ABL1/CDC42/FGG/RAC1	4
BP	GO:2000249	regulation of actin cytoskeleton reorganization	4/153	37/18670	0.00023202	0.001052505	0.00048578	ABL1/CDC42/HRAS/TEK	4
BP	GO:0010812	negative regulation of cell-substrate adhesion	5/153	68/18670	0.000238121	0.001077809	0.000497459	RHOA/MMP12/PIK3R1/PLG/SRC	5
BP	GO:0050918	positive chemotaxis	5/153	68/18670	0.000238121	0.001077809	0.000497459	HGF/KDR/LGALS3/MET/CCL5	5
BP	GO:0071774	response to fibroblast growth factor	7/153	150/18670	0.000239274	0.001080479	0.000498691	FGF1/FGFR1/FGFR2/GRB2/MAPK1/PTPN11/CCL5	7
BP	GO:0017038	protein import	8/153	199/18670	0.000239496	0.001080479	0.000498691	AKT1/MAPK14/HSPA8/HSP90AA1/MMP12/PIK3R1/MAPK1/SYK	8
BP	GO:0031032	actomyosin structure organization	8/153	199/18670	0.000239496	0.001080479	0.000498691	ABL1/RHOA/CDC42/MET/PIK3R1/RAC1/SRC/TGFBR1	8
BP	GO:0010975	regulation of neuron projection development	13/153	499/18670	0.000242266	0.001091785	0.000503909	ABL1/AKT1/RHOA/BMP7/FGFR1/GSK3B/HGF/IL2/MDM2/MAP2K1/PTK2/REG1A/S100A9	13
BP	GO:0045666	positive regulation of neuron differentiation	11/153	371/18670	0.000247917	0.001116033	0.000515101	RHOA/BMP2/BMP7/FGFR1/HGF/IL2/MAP2K1/RARA/RARB/REG1A/S100A9	11
BP	GO:1990778	protein localization to cell periphery	10/153	311/18670	0.000250515	0.001126498	0.000519931	AKT1/AKT2/AR/BCL2L1/EGFR/EPHA2/HRAS/LGALS3/PIK3R1/PLK1	10
BP	GO:0062014	negative regulation of small molecule metabolic process	6/153	107/18670	0.000251156	0.001128154	0.000520695	PARP1/AKT1/RHOA/BMP2/PPARA/AKR1C3	6
BP	GO:0071300	cellular response to retinoic acid	5/153	69/18670	0.000255044	0.001144371	0.00052818	FGFR2/PPARG/RARA/RARB/RARG	5
BP	GO:0016572	histone phosphorylation	4/153	38/18670	0.000257673	0.00114992	0.000530741	CDK2/CHEK1/JAK2/AURKA	4
BP	GO:0032350	regulation of hormone metabolic process	4/153	38/18670	0.000257673	0.00114992	0.000530741	BMP2/HPN/VDR/AKR1C3	4
BP	GO:0046825	regulation of protein export from nucleus	4/153	38/18670	0.000257673	0.00114992	0.000530741	GSK3B/MDM2/PRKACA/PTPN11	4
BP	GO:0048246	macrophage chemotaxis	4/153	38/18670	0.000257673	0.00114992	0.000530741	MAPK14/CYP19A1/LGALS3/CCL5	4
BP	GO:1904706	negative regulation of vascular smooth muscle cell proliferation	4/153	38/18670	0.000257673	0.00114992	0.000530741	GSTP1/HMOX1/PPARG/SOD2	4
BP	GO:0072522	purine-containing compound biosynthetic process	10/153	313/18670	0.000263663	0.001175379	0.000542492	PARP1/ALDOA/IGF1/IMPDH1/INSR/MTAP/NOS2/NOS3/PPARA/GMPR2	10
BP	GO:2000278	regulation of DNA biosynthetic process	6/153	108/18670	0.000264154	0.001176298	0.000542916	HGF/HSP90AA1/HSP90AB1/PPARG/MAPK1/SRC	6
BP	GO:0090596	sensory organ morphogenesis	9/153	256/18670	0.000266945	0.001187446	0.000548061	BMP7/EPHA2/FGFR1/FGFR2/HPN/MAPK1/RARB/RARG/RBP4	9
BP	GO:0060395	SMAD protein signal transduction	5/153	70/18670	0.000272866	0.001212475	0.000559613	PARP1/BMP2/BMP7/TGFB2/TGFBR1	5
BP	GO:0051961	negative regulation of nervous system development	10/153	315/18670	0.000277385	0.001231194	0.000568253	RHOA/BMP7/CTNNA1/EIF4E/ERBB4/F2/GSK3B/MDM2/PRKACA/PTK2	10
BP	GO:0021761	limbic system development	6/153	109/18670	0.000277675	0.001231194	0.000568253	CASP3/CDK6/FGFR1/FGFR2/GSK3B/RARA	6
BP	GO:0010885	regulation of cholesterol storage	3/153	16/18670	0.000279436	0.001235025	0.000570021	PPARA/PPARG/NR1H2	3
BP	GO:0060572	morphogenesis of an epithelial bud	3/153	16/18670	0.000279436	0.001235025	0.000570021	AR/BMP7/FGFR2	3
BP	GO:0097067	cellular response to thyroid hormone stimulus	3/153	16/18670	0.000279436	0.001235025	0.000570021	CTSB/CTSL/KIT	3
BP	GO:0045766	positive regulation of angiogenesis	8/153	204/18670	0.000283237	0.001249146	0.000576539	ABL1/FGF1/HGF/HMOX1/KDR/NOS3/TEK/TGFBR2	8
BP	GO:1902905	positive regulation of supramolecular fiber organization	8/153	204/18670	0.000283237	0.001249146	0.000576539	ABL1/RHOA/CDC42/GRB2/HSPA1A/MET/RAC1/TGFBR1	8
BP	GO:0033146	regulation of intracellular estrogen receptor signaling pathway	4/153	39/18670	0.000285303	0.001256915	0.000580124	PARP1/AR/ESR1/SRC	4
BP	GO:0090257	regulation of muscle system process	9/153	259/18670	0.000290858	0.001280023	0.00059079	PARP1/RHOA/IGF1/KIT/NOS3/PIK3CG/PPARA/PRKACA/PTK2	9
BP	GO:0033692	cellular polysaccharide biosynthetic process	5/153	71/18670	0.000291617	0.001280633	0.000591071	AKT1/AKT2/GSK3B/IGF1/INSR	5
BP	GO:0071479	cellular response to ionizing radiation	5/153	71/18670	0.000291617	0.001280633	0.000591071	BCL2L1/MAPK14/GRB2/HRAS/MDM2	5
BP	GO:0006109	regulation of carbohydrate metabolic process	8/153	206/18670	0.000302468	0.001326875	0.000612414	AKT1/AKT2/GSK3B/IGF1/INSR/PPARA/RORA/SRC	8
BP	GO:0045216	cell-cell junction organization	7/153	156/18670	0.000303969	0.001332043	0.0006148	RHOA/CTNNA1/ACE/EPHA2/PRKACA/TGFB2/TGFBR1	7
BP	GO:0002532	production of molecular mediator involved in inflammatory response	5/153	72/18670	0.00031133	0.001361408	0.000628353	BTK/MAPK14/F2/NOS2/SYK	5
BP	GO:0061035	regulation of cartilage development	5/153	72/18670	0.00031133	0.001361408	0.000628353	BMP2/RARA/RARB/RARG/TGFBR1	5
BP	GO:0030073	insulin secretion	8/153	207/18670	0.000312477	0.001364979	0.000630001	DPP4/JAK2/NOS2/PTPN11/RAC1/RAF1/RBP4/CCL5	8
BP	GO:0001990	regulation of systemic arterial blood pressure by hormone	4/153	40/18670	0.000314995	0.001370178	0.000632401	RHOA/ACE/MME/NOS3	4
BP	GO:0042026	protein refolding	4/153	40/18670	0.000314995	0.001370178	0.000632401	HSPA1A/HSPA8/HSP90AA1/PPIA	4
BP	GO:0045124	regulation of bone resorption	4/153	40/18670	0.000314995	0.001370178	0.000632401	CA2/EGFR/SRC/SYK	4
BP	GO:0046621	negative regulation of organ growth	4/153	40/18670	0.000314995	0.001370178	0.000632401	PPARA/PTK2/RBP4/TGFBR2	4
BP	GO:0007389	pattern specification process	12/153	446/18670	0.00031557	0.001371234	0.000632888	AR/BMP2/BMP7/ERBB4/FGF1/FGFR1/FGFR2/PRKACA/RARG/AURKA/TGFBR1/TGFBR2	12
BP	GO:0031570	DNA integrity checkpoint	7/153	157/18670	0.000316001	0.001371662	0.000633085	CDK2/CHEK1/MAPK14/MDM2/PLK1/PTPN11/AURKA	7
BP	GO:0043279	response to alkaloid	6/153	112/18670	0.000321524	0.00139271	0.0006428	BCL2L1/CASP3/CASP7/HSP90AB1/MDM2/PPARG	6
BP	GO:0051817	modification of morphology or physiology of other organism involved in symbiotic interaction	6/153	112/18670	0.000321524	0.00139271	0.0006428	BCL2L1/F2/HPN/INSR/CCL5/TYMS	6
BP	GO:0007623	circadian rhythm	8/153	208/18670	0.000322755	0.001395111	0.000643908	EGFR/GSK3B/NOS2/PPARA/PPARG/MAPK8/RORA/TYMS	8
BP	GO:0009124	nucleoside monophosphate biosynthetic process	8/153	208/18670	0.000322755	0.001395111	0.000643908	PARP1/ALDOA/IGF1/IMPDH1/INSR/PPARA/TYMS/UMPS	8
BP	GO:0072401	signal transduction involved in DNA integrity checkpoint	5/153	73/18670	0.000332036	0.001430735	0.000660351	CDK2/CHEK1/MDM2/PLK1/AURKA	5
BP	GO:0072422	signal transduction involved in DNA damage checkpoint	5/153	73/18670	0.000332036	0.001430735	0.000660351	CDK2/CHEK1/MDM2/PLK1/AURKA	5
BP	GO:1903524	positive regulation of blood circulation	5/153	73/18670	0.000332036	0.001430735	0.000660351	AKT1/RHOA/EGFR/FGG/TGFB2	5
BP	GO:0003198	epithelial to mesenchymal transition involved in endocardial cushion formation	3/153	17/18670	0.00033728	0.001442821	0.000665929	TGFB2/TGFBR1/TGFBR2	3
BP	GO:0030540	female genitalia development	3/153	17/18670	0.00033728	0.001442821	0.000665929	CYP19A1/ESR1/RBP4	3
BP	GO:0060644	mammary gland epithelial cell differentiation	3/153	17/18670	0.00033728	0.001442821	0.000665929	AKT1/AKT2/ERBB4	3
BP	GO:0090185	negative regulation of kidney development	3/153	17/18670	0.00033728	0.001442821	0.000665929	BMP7/MMP9/STAT1	3
BP	GO:2000641	regulation of early endosome to late endosome transport	3/153	17/18670	0.00033728	0.001442821	0.000665929	MAPK1/MAP2K1/SRC	3
BP	GO:0002223	stimulatory C-type lectin receptor signaling pathway	6/153	113/18670	0.000337287	0.001442821	0.000665929	HRAS/ICAM2/PRKACA/RAF1/SRC/SYK	6
BP	GO:0043200	response to amino acid	6/153	113/18670	0.000337287	0.001442821	0.000665929	RHOA/BCL2L1/CASP3/EGFR/GSTP1/MMP2	6
BP	GO:0021575	hindbrain morphogenesis	4/153	41/18670	0.000346838	0.001479077	0.000682663	ABL1/MAP2K1/PTPN11/RORA	4
BP	GO:0050798	activated T cell proliferation	4/153	41/18670	0.000346838	0.001479077	0.000682663	ABL1/CASP3/IGF1/IL2	4
BP	GO:1902893	regulation of pri-miRNA transcription by RNA polymerase II	4/153	41/18670	0.000346838	0.001479077	0.000682663	BMP2/NR3C1/PPARA/TGFB2	4
BP	GO:0009165	nucleotide biosynthetic process	11/153	386/18670	0.000347369	0.001479812	0.000683002	PARP1/ALDOA/IGF1/IMPDH1/INSR/NOS2/NOS3/PPARA/MAPK1/TYMS/UMPS	11
BP	GO:0008543	fibroblast growth factor receptor signaling pathway	6/153	114/18670	0.000353649	0.001500879	0.000692725	FGF1/FGFR1/FGFR2/GRB2/MAPK1/PTPN11	6
BP	GO:0005977	glycogen metabolic process	5/153	74/18670	0.000353768	0.001500879	0.000692725	AKT1/AKT2/GSK3B/IGF1/INSR	5
BP	GO:0032418	lysosome localization	5/153	74/18670	0.000353768	0.001500879	0.000692725	BTK/HMOX1/KIT/PIK3CG/SYK	5
BP	GO:0072395	signal transduction involved in cell cycle checkpoint	5/153	74/18670	0.000353768	0.001500879	0.000692725	CDK2/CHEK1/MDM2/PLK1/AURKA	5
BP	GO:0032680	regulation of tumor necrosis factor production	7/153	160/18670	0.000354406	0.001502043	0.000693262	GSTP1/IGF1/JAK2/PIK3R1/PTPN11/RARA/SYK	7
BP	GO:0001707	mesoderm formation	5/153	75/18670	0.00037656	0.001587781	0.000732835	BMP7/EPHA2/FGFR1/FGFR2/PRKACA	5
BP	GO:0001960	negative regulation of cytokine-mediated signaling pathway	5/153	75/18670	0.00037656	0.001587781	0.000732835	GSTP1/MMP12/PPARG/CCL5/NR1H2	5
BP	GO:0006073	cellular glucan metabolic process	5/153	75/18670	0.00037656	0.001587781	0.000732835	AKT1/AKT2/GSK3B/IGF1/INSR	5
BP	GO:0044042	glucan metabolic process	5/153	75/18670	0.00037656	0.001587781	0.000732835	AKT1/AKT2/GSK3B/IGF1/INSR	5
BP	GO:0150076	neuroinflammatory response	5/153	75/18670	0.00037656	0.001587781	0.000732835	EGFR/IGF1/JAK2/MMP3/MMP9	5
BP	GO:1901293	nucleoside phosphate biosynthetic process	11/153	390/18670	0.000378949	0.001596224	0.000736731	PARP1/ALDOA/IGF1/IMPDH1/INSR/NOS2/NOS3/PPARA/MAPK1/TYMS/UMPS	11
BP	GO:0017145	stem cell division	4/153	42/18670	0.00038092	0.00160126	0.000739056	FGFR1/FGFR2/KIT/TGFB2	4
BP	GO:1901031	regulation of response to reactive oxygen species	4/153	42/18670	0.00038092	0.00160126	0.000739056	BMP7/DHFR/HGF/MET	4
BP	GO:0002220	innate immune response activating cell surface receptor signaling pathway	6/153	116/18670	0.000388234	0.001630348	0.000752481	HRAS/ICAM2/PRKACA/RAF1/SRC/SYK	6
BP	GO:0016051	carbohydrate biosynthetic process	8/153	214/18670	0.000390377	0.001637681	0.000755866	AKT1/AKT2/ALDOA/GSK3B/IGF1/INSR/PPARA/RBP4	8
BP	GO:0031214	biomineral tissue development	7/153	163/18670	0.000396467	0.001658172	0.000765323	BMP2/BMP7/FGFR2/IGF1/MMP13/NOS3/PPARA	7
BP	GO:0032640	tumor necrosis factor production	7/153	163/18670	0.000396467	0.001658172	0.000765323	GSTP1/IGF1/JAK2/PIK3R1/PTPN11/RARA/SYK	7
BP	GO:1903555	regulation of tumor necrosis factor superfamily cytokine production	7/153	163/18670	0.000396467	0.001658172	0.000765323	GSTP1/IGF1/JAK2/PIK3R1/PTPN11/RARA/SYK	7
BP	GO:0042310	vasoconstriction	5/153	76/18670	0.000400443	0.001670759	0.000771133	AKT1/RHOA/ACE/EGFR/FGG	5
BP	GO:0010878	cholesterol storage	3/153	18/18670	0.00040231	0.001670759	0.000771133	PPARA/PPARG/NR1H2	3
BP	GO:0031998	regulation of fatty acid beta-oxidation	3/153	18/18670	0.00040231	0.001670759	0.000771133	AKT1/AKT2/PPARA	3
BP	GO:0045780	positive regulation of bone resorption	3/153	18/18670	0.00040231	0.001670759	0.000771133	CA2/EGFR/SYK	3
BP	GO:0046852	positive regulation of bone remodeling	3/153	18/18670	0.00040231	0.001670759	0.000771133	CA2/EGFR/SYK	3
BP	GO:0060749	mammary gland alveolus development	3/153	18/18670	0.00040231	0.001670759	0.000771133	AR/ERBB4/ESR1	3
BP	GO:0061377	mammary gland lobule development	3/153	18/18670	0.00040231	0.001670759	0.000771133	AR/ERBB4/ESR1	3
BP	GO:1900371	regulation of purine nucleotide biosynthetic process	6/153	117/18670	0.00040649	0.001686423	0.000778362	PARP1/IGF1/INSR/NOS2/NOS3/PPARA	6
BP	GO:0007088	regulation of mitotic nuclear division	7/153	164/18670	0.000411342	0.001704839	0.000786862	BMP7/CHEK1/HSPA1A/IGF1/INSR/PLK1/AURKA	7
BP	GO:0008631	intrinsic apoptotic signaling pathway in response to oxidative stress	4/153	43/18670	0.00041733	0.001719301	0.000793537	PARP1/AKT1/JAK2/SOD2	4
BP	GO:0009163	nucleoside biosynthetic process	4/153	43/18670	0.00041733	0.001719301	0.000793537	TYMP/IMPDH1/MTAP/UMPS	4
BP	GO:0031279	regulation of cyclase activity	4/153	43/18670	0.00041733	0.001719301	0.000793537	MAPK14/NOS2/NOS3/MAPK8	4
BP	GO:0032459	regulation of protein oligomerization	4/153	43/18670	0.00041733	0.001719301	0.000793537	ALB/MMP1/MMP3/SRC	4
BP	GO:0055026	negative regulation of cardiac muscle tissue development	4/153	43/18670	0.00041733	0.001719301	0.000793537	BMP2/PPARA/RBP4/TGFBR2	4
BP	GO:1904646	cellular response to amyloid-beta	4/153	43/18670	0.00041733	0.001719301	0.000793537	PARP1/GSK3B/IGF1/IGF1R	4
BP	GO:0010639	negative regulation of organelle organization	11/153	395/18670	0.000421789	0.001735936	0.000801215	PARP1/AKT1/BCL2L1/BMP7/CHEK1/HGF/HSPA1A/IGF1/MET/PLK1/SRC	11
BP	GO:0030808	regulation of nucleotide biosynthetic process	6/153	118/18670	0.000425409	0.001745796	0.000805766	PARP1/IGF1/INSR/NOS2/NOS3/PPARA	6
BP	GO:0006278	RNA-dependent DNA biosynthetic process	5/153	77/18670	0.000425453	0.001745796	0.000805766	HSP90AA1/HSP90AB1/PPIA/MAPK1/SRC	5
BP	GO:0048332	mesoderm morphogenesis	5/153	77/18670	0.000425453	0.001745796	0.000805766	BMP7/EPHA2/FGFR1/FGFR2/PRKACA	5
BP	GO:0000271	polysaccharide biosynthetic process	5/153	78/18670	0.000451623	0.001845843	0.000851942	AKT1/AKT2/GSK3B/IGF1/INSR	5
BP	GO:0031016	pancreas development	5/153	78/18670	0.000451623	0.001845843	0.000851942	AKT1/CDK6/GSK3B/INSR/MET	5
BP	GO:0033143	regulation of intracellular steroid hormone receptor signaling pathway	5/153	78/18670	0.000451623	0.001845843	0.000851942	PARP1/AR/RHOA/ESR1/SRC	5
BP	GO:0090398	cellular senescence	5/153	78/18670	0.000451623	0.001845843	0.000851942	ABL1/CDK6/MAPK14/HRAS/MAP2K1	5
BP	GO:0033209	tumor necrosis factor-mediated signaling pathway	7/153	167/18670	0.000458664	0.001872764	0.000864367	CASP1/GSTP1/HSPA1A/JAK2/STAT1/SYK/ADAM17	7
BP	GO:0007015	actin filament organization	11/153	400/18670	0.000468626	0.001911549	0.000882268	ABL1/ALDOA/RHOA/CDC42/GRB2/JAK2/MET/PIK3R1/RAC1/SRC/TGFBR1	11
BP	GO:0010544	negative regulation of platelet activation	3/153	19/18670	0.000474879	0.001921865	0.00088703	F2/FGG/NOS3	3
BP	GO:0010888	negative regulation of lipid storage	3/153	19/18670	0.000474879	0.001921865	0.00088703	PPARA/PPARG/NR1H2	3
BP	GO:0032930	positive regulation of superoxide anion generation	3/153	19/18670	0.000474879	0.001921865	0.00088703	EGFR/GSTP1/SYK	3
BP	GO:0051131	chaperone-mediated protein complex assembly	3/153	19/18670	0.000474879	0.001921865	0.00088703	HSPA1A/HSP90AA1/HSP90AB1	3
BP	GO:1903798	regulation of production of miRNAs involved in gene silencing by miRNA	3/153	19/18670	0.000474879	0.001921865	0.00088703	EGFR/ESR1/MAP2K1	3
BP	GO:1905288	vascular associated smooth muscle cell apoptotic process	3/153	19/18670	0.000474879	0.001921865	0.00088703	IGF1/PPARG/SOD2	3
BP	GO:1905459	regulation of vascular associated smooth muscle cell apoptotic process	3/153	19/18670	0.000474879	0.001921865	0.00088703	IGF1/PPARG/SOD2	3
BP	GO:2000010	positive regulation of protein localization to cell surface	3/153	19/18670	0.000474879	0.001921865	0.00088703	AKT1/ERBB4/HSP90AB1	3
BP	GO:0071706	tumor necrosis factor superfamily cytokine production	7/153	168/18670	0.000475369	0.001921961	0.000887074	GSTP1/IGF1/JAK2/PIK3R1/PTPN11/RARA/SYK	7
BP	GO:0042326	negative regulation of phosphorylation	12/153	468/18670	0.000485658	0.001961641	0.000905388	ABL1/AKT1/RHOA/BMP7/CASP3/GSTP1/HGF/IGF1R/IL2/PLK1/PPARA/PTPN1	12
BP	GO:0046718	viral entry into host cell	6/153	121/18670	0.000486319	0.001962389	0.000905733	CTSB/DPP4/EGFR/EPHA2/HSPA1A/PPIA	6
BP	GO:0001974	blood vessel remodeling	4/153	45/18670	0.000497494	0.002001613	0.000923837	ACE/MDM2/NOS3/TGM2	4
BP	GO:0032309	icosanoid secretion	4/153	45/18670	0.000497494	0.002001613	0.000923837	ACE/NOS2/PLA2G2A/SYK	4
BP	GO:1902743	regulation of lamellipodium organization	4/153	45/18670	0.000497494	0.002001613	0.000923837	CDC42/EPHA2/RAC1/SRC	4
BP	GO:0009167	purine ribonucleoside monophosphate metabolic process	10/153	340/18670	0.000505875	0.00203335	0.000938485	PARP1/ALDOA/RHOA/HSPA1A/HSPA8/IGF1/IMPDH1/INSR/PPARA/GMPR2	10
BP	GO:0043500	muscle adaptation	6/153	122/18670	0.000508063	0.002040159	0.000941628	PARP1/HMOX1/IGF1/NOS3/PPARA/PTK2	6
BP	GO:0055074	calcium ion homeostasis	12/153	471/18670	0.000513955	0.002061814	0.000951623	ABL1/ANXA5/ESR1/F2/IL2/JAK2/PIK3CG/PRKACA/REG1A/CCL5/TGM2/VDR	12
BP	GO:0009126	purine nucleoside monophosphate metabolic process	10/153	341/18670	0.000517554	0.002074236	0.000957356	PARP1/ALDOA/RHOA/HSPA1A/HSPA8/IGF1/IMPDH1/INSR/PPARA/GMPR2	10
BP	GO:0030100	regulation of endocytosis	9/153	281/18670	0.000526245	0.00210702	0.000972488	ABL1/LGALS3/PPARG/PTPN1/RAC1/SRC/SYK/NR1H2/TNK2	9
BP	GO:0009116	nucleoside metabolic process	6/153	123/18670	0.000530557	0.002122226	0.000979506	RHOA/TYMP/IMPDH1/MTAP/UMPS/GMPR2	6
BP	GO:0060761	negative regulation of response to cytokine stimulus	5/153	81/18670	0.000537445	0.002147698	0.000991262	GSTP1/MMP12/PPARG/CCL5/NR1H2	5
BP	GO:0030810	positive regulation of nucleotide biosynthetic process	4/153	46/18670	0.000541428	0.002149677	0.000992175	IGF1/INSR/NOS2/NOS3	4
BP	GO:0031648	protein destabilization	4/153	46/18670	0.000541428	0.002149677	0.000992175	BMP2/MDM2/PLK1/SRC	4
BP	GO:0032369	negative regulation of lipid transport	4/153	46/18670	0.000541428	0.002149677	0.000992175	AKT1/AKT2/PTPN11/NR1H2	4
BP	GO:0045776	negative regulation of blood pressure	4/153	46/18670	0.000541428	0.002149677	0.000992175	NOS2/NOS3/PPARA/SOD2	4
BP	GO:0071354	cellular response to interleukin-6	4/153	46/18670	0.000541428	0.002149677	0.000992175	FGG/JAK2/PTPN11/STAT1	4
BP	GO:1900373	positive regulation of purine nucleotide biosynthetic process	4/153	46/18670	0.000541428	0.002149677	0.000992175	IGF1/INSR/NOS2/NOS3	4
BP	GO:0032956	regulation of actin cytoskeleton organization	10/153	343/18670	0.000541585	0.002149677	0.000992175	ABL1/RHOA/CDC42/GRB2/HRAS/MET/PIK3R1/RAC1/TEK/TGFBR1	10
BP	GO:0051262	protein tetramerization	7/153	172/18670	0.00054711	0.00216952	0.001001334	ALDOA/CAT/IGF1R/INSR/REG1A/CCL5/SOD2	7
BP	GO:0051258	protein polymerization	9/153	283/18670	0.000553752	0.002189513	0.001010562	ABL1/RHOA/FGG/GRB2/HSPA1A/HSP90AA1/JAK2/MET/RAC1	9
BP	GO:0019218	regulation of steroid metabolic process	6/153	124/18670	0.000553818	0.002189513	0.001010562	BMP2/FGF1/KIT/RORA/VDR/AKR1C3	6
BP	GO:0033630	positive regulation of cell adhesion mediated by integrin	3/153	20/18670	0.000555334	0.002189513	0.001010562	CCL5/SYK/TGFB2	3
BP	GO:0043931	ossification involved in bone maturation	3/153	20/18670	0.000555334	0.002189513	0.001010562	RHOA/BMP2/IGF1	3
BP	GO:0060602	branch elongation of an epithelium	3/153	20/18670	0.000555334	0.002189513	0.001010562	ESR1/FGF1/FGFR2	3
BP	GO:1902236	negative regulation of endoplasmic reticulum stress-induced intrinsic apoptotic signaling pathway	3/153	20/18670	0.000555334	0.002189513	0.001010562	BCL2L1/HSPA1A/PTPN1	3
BP	GO:0034404	nucleobase-containing small molecule biosynthetic process	8/153	226/18670	0.000560287	0.002206934	0.001018602	ALDOA/TYMP/IGF1/IMPDH1/INSR/MTAP/PPARA/UMPS	8
BP	GO:0010833	telomere maintenance via telomere lengthening	5/153	82/18670	0.000568607	0.002229068	0.001028818	PARP1/HSP90AA1/HSP90AB1/MAPK1/SRC	5
BP	GO:0032642	regulation of chemokine production	5/153	82/18670	0.000568607	0.002229068	0.001028818	EPHA2/GSTP1/HMOX1/SYK/ADAM17	5
BP	GO:0034644	cellular response to UV	5/153	82/18670	0.000568607	0.002229068	0.001028818	PARP1/CHEK1/MDM2/MME/PIK3R1	5
BP	GO:0071158	positive regulation of cell cycle arrest	5/153	82/18670	0.000568607	0.002229068	0.001028818	CDK2/FAP/MDM2/PRKACA/AURKA	5
BP	GO:0097581	lamellipodium organization	5/153	82/18670	0.000568607	0.002229068	0.001028818	CDC42/EPHA2/KIT/RAC1/SRC	5
BP	GO:0014911	positive regulation of smooth muscle cell migration	4/153	47/18670	0.000588051	0.002292232	0.001057971	IGF1/MDM2/CCL5/SRC	4
BP	GO:0045646	regulation of erythrocyte differentiation	4/153	47/18670	0.000588051	0.002292232	0.001057971	CDK6/MAPK14/HSPA1A/STAT1	4
BP	GO:0046638	positive regulation of alpha-beta T cell differentiation	4/153	47/18670	0.000588051	0.002292232	0.001057971	RHOA/RARA/SYK/TGFBR2	4
BP	GO:0050435	amyloid-beta metabolic process	4/153	47/18670	0.000588051	0.002292232	0.001057971	CASP3/ACE/IGF1/MME	4
BP	GO:0070231	T cell apoptotic process	4/153	47/18670	0.000588051	0.002292232	0.001057971	AKT1/JAK3/LGALS3/CCL5	4
BP	GO:1901659	glycosyl compound biosynthetic process	4/153	47/18670	0.000588051	0.002292232	0.001057971	TYMP/IMPDH1/MTAP/UMPS	4
BP	GO:0002440	production of molecular mediator of immune response	9/153	286/18670	0.000597218	0.002323576	0.001072438	BTK/MAPK14/HMOX1/IL2/JAK3/KIT/PMS2/RBP4/TGFB2	9
BP	GO:0044262	cellular carbohydrate metabolic process	9/153	286/18670	0.000597218	0.002323576	0.001072438	AKT1/AKT2/BRAF/GSK3B/IGF1/INSR/PPARA/RORA/SRC	9
BP	GO:0045582	positive regulation of T cell differentiation	5/153	83/18670	0.000601106	0.002336501	0.001078403	RHOA/IL2/RARA/SYK/TGFBR2	5
BP	GO:0050796	regulation of insulin secretion	7/153	176/18670	0.000627218	0.002435708	0.001124192	DPP4/JAK2/NOS2/PTPN11/RAC1/RBP4/CCL5	7
BP	GO:0002718	regulation of cytokine production involved in immune response	5/153	84/18670	0.000634978	0.002458903	0.001134898	BTK/MAPK14/HMOX1/JAK3/TGFB2	5
BP	GO:0010507	negative regulation of autophagy	5/153	84/18670	0.000634978	0.002458903	0.001134898	AKT1/HGF/HMOX1/MET/PTK2	5
BP	GO:0097756	negative regulation of blood vessel diameter	5/153	84/18670	0.000634978	0.002458903	0.001134898	AKT1/RHOA/ACE/EGFR/FGG	5
BP	GO:0010862	positive regulation of pathway-restricted SMAD protein phosphorylation	4/153	48/18670	0.000637454	0.002461563	0.001136125	BMP2/BMP7/TGFB2/TGFBR1	4
BP	GO:0046850	regulation of bone remodeling	4/153	48/18670	0.000637454	0.002461563	0.001136125	CA2/EGFR/SRC/SYK	4
BP	GO:1903727	positive regulation of phospholipid metabolic process	4/153	48/18670	0.000637454	0.002461563	0.001136125	KIT/PTK2/SRC/TEK	4
BP	GO:0034248	regulation of cellular amide metabolic process	12/153	483/18670	0.000641462	0.002468405	0.001139283	AKT1/AKT2/RHOA/CASP3/DAPK1/DHFR/EIF4E/IGF1/MAPK1/RARA/CCL5/TYMS	12
BP	GO:0006067	ethanol metabolic process	3/153	21/18670	0.00064401	0.002468405	0.001139283	ADH1C/ALDH2/SULT1A1	3
BP	GO:0021697	cerebellar cortex formation	3/153	21/18670	0.00064401	0.002468405	0.001139283	MAP2K1/PTPN11/RORA	3
BP	GO:0035162	embryonic hemopoiesis	3/153	21/18670	0.00064401	0.002468405	0.001139283	KDR/KIT/TGFBR2	3
BP	GO:0046827	positive regulation of protein export from nucleus	3/153	21/18670	0.00064401	0.002468405	0.001139283	GSK3B/MDM2/PRKACA	3
BP	GO:0051900	regulation of mitochondrial depolarization	3/153	21/18670	0.00064401	0.002468405	0.001139283	PARP1/KDR/SRC	3
BP	GO:0070920	regulation of production of small RNA involved in gene silencing by RNA	3/153	21/18670	0.00064401	0.002468405	0.001139283	EGFR/ESR1/MAP2K1	3
BP	GO:0072111	cell proliferation involved in kidney development	3/153	21/18670	0.00064401	0.002468405	0.001139283	BMP2/BMP7/STAT1	3
BP	GO:0060491	regulation of cell projection assembly	7/153	177/18670	0.000648632	0.002483816	0.001146396	CDC42/EPHA2/HRAS/KIT/RAC1/SRC/TGFBR1	7
BP	GO:0002687	positive regulation of leukocyte migration	6/153	128/18670	0.000654896	0.002505478	0.001156394	RHOA/MAPK14/LGALS3/RAC1/CCL5/ADAM17	6
BP	GO:0003015	heart process	9/153	290/18670	0.000659484	0.002520694	0.001163417	ACE/IL2/JAK2/MDM2/NOS3/PIK3CG/PRKACA/SRC/TGFB2	9
BP	GO:1902903	regulation of supramolecular fiber organization	10/153	352/18670	0.000661487	0.002526012	0.001165871	ABL1/RHOA/CDC42/GRB2/HSPA1A/HSPA8/MET/PIK3R1/RAC1/TGFBR1	10
BP	GO:0071482	cellular response to light stimulus	6/153	129/18670	0.000682267	0.00260055	0.001200274	PARP1/AKT2/CHEK1/MDM2/MME/PIK3R1	6
BP	GO:1903038	negative regulation of leukocyte cell-cell adhesion	6/153	129/18670	0.000682267	0.00260055	0.001200274	AKT1/CASP3/IL2/JAK3/LGALS3/PPARA	6
BP	GO:0043588	skin development	11/153	419/18670	0.000688337	0.002619323	0.001208939	CASP3/CTSL/EGFR/EPHA2/FGFR2/MET/MAP2K1/ST14/TGFB2/VDR/AKR1C3	11
BP	GO:0035094	response to nicotine	4/153	49/18670	0.00068973	0.002619323	0.001208939	CASP3/HMOX1/PPARA/MAPK1	4
BP	GO:0071715	icosanoid transport	4/153	49/18670	0.00068973	0.002619323	0.001208939	ACE/NOS2/PLA2G2A/SYK	4
BP	GO:1901571	fatty acid derivative transport	4/153	49/18670	0.00068973	0.002619323	0.001208939	ACE/NOS2/PLA2G2A/SYK	4
BP	GO:0008361	regulation of cell size	7/153	179/18670	0.0006932	0.002622849	0.001210566	ABL1/AKT1/RHOA/GSK3B/HSP90AB1/RAC1/RARG	7
BP	GO:0030177	positive regulation of Wnt signaling pathway	7/153	179/18670	0.0006932	0.002622849	0.001210566	ABL1/XIAP/BMP2/CSNK2A1/EGFR/FGFR2/SRC	7
BP	GO:0048736	appendage development	7/153	179/18670	0.0006932	0.002622849	0.001210566	BMP7/FGFR1/FGFR2/RARA/RARB/RARG/TGFB2	7
BP	GO:0060173	limb development	7/153	179/18670	0.0006932	0.002622849	0.001210566	BMP7/FGFR1/FGFR2/RARA/RARB/RARG/TGFB2	7
BP	GO:0006919	activation of cysteine-type endopeptidase activity involved in apoptotic process	5/153	86/18670	0.000706992	0.002665263	0.001230142	APAF1/CASP1/JAK2/PPARG/S100A9	5
BP	GO:0034637	cellular carbohydrate biosynthetic process	5/153	86/18670	0.000706992	0.002665263	0.001230142	AKT1/AKT2/GSK3B/IGF1/INSR	5
BP	GO:0042446	hormone biosynthetic process	5/153	86/18670	0.000706992	0.002665263	0.001230142	BMP2/CYP19A1/HSD17B1/VDR/AKR1C3	5
BP	GO:0070542	response to fatty acid	5/153	86/18670	0.000706992	0.002665263	0.001230142	AKT1/CAT/PPARG/SRC/AKR1C3	5
BP	GO:0003231	cardiac ventricle development	6/153	130/18670	0.000710515	0.00267366	0.001234018	FGFR2/MDM2/NOS3/TGFB2/TGFBR1/TGFBR2	6
BP	GO:0050671	positive regulation of lymphocyte proliferation	6/153	130/18670	0.000710515	0.00267366	0.001234018	IGF1/IL2/JAK3/CCL5/SYK/TGFBR2	6
BP	GO:0070613	regulation of protein processing	7/153	180/18670	0.000716376	0.002690809	0.001241933	XIAP/F2/HPN/MDM2/PRKACA/SRC/BIRC7	7
BP	GO:1901796	regulation of signal transduction by p53 class mediator	7/153	180/18670	0.000716376	0.002690809	0.001241933	AKT1/CDK2/CHEK1/MAPK14/CSNK2A1/MDM2/AURKA	7
BP	GO:0006469	negative regulation of protein kinase activity	8/153	235/18670	0.000723474	0.002715002	0.001253099	ABL1/AKT1/BMP7/CASP3/GSTP1/IGF1R/PLK1/PTPN1	8
BP	GO:0022412	cellular process involved in reproduction in multicellular organism	10/153	357/18670	0.000737071	0.002763512	0.001275489	AKT1/BCL2L1/IGF1/KIT/PLK1/PRKACA/RARA/SRC/AURKA/TGFBR1	10
BP	GO:0032946	positive regulation of mononuclear cell proliferation	6/153	131/18670	0.00073966	0.002763897	0.001275666	IGF1/IL2/JAK3/CCL5/SYK/TGFBR2	6
BP	GO:0010869	regulation of receptor biosynthetic process	3/153	22/18670	0.000741231	0.002763897	0.001275666	JAK2/PPARA/PPARG	3
BP	GO:0030878	thyroid gland development	3/153	22/18670	0.000741231	0.002763897	0.001275666	MAPK1/MAP2K1/RAF1	3
BP	GO:0032928	regulation of superoxide anion generation	3/153	22/18670	0.000741231	0.002763897	0.001275666	EGFR/GSTP1/SYK	3
BP	GO:0071379	cellular response to prostaglandin stimulus	3/153	22/18670	0.000741231	0.002763897	0.001275666	AKT1/PPARG/AKR1C3	3
BP	GO:0050768	negative regulation of neurogenesis	9/153	295/18670	0.000744688	0.002763897	0.001275666	RHOA/BMP7/CTNNA1/EIF4E/ERBB4/F2/GSK3B/MDM2/PTK2	9
BP	GO:0001961	positive regulation of cytokine-mediated signaling pathway	4/153	50/18670	0.000744969	0.002763897	0.001275666	CASP1/HSPA1A/MMP12/ADAM17	4
BP	GO:0031113	regulation of microtubule polymerization	4/153	50/18670	0.000744969	0.002763897	0.001275666	ABL1/HSPA1A/MET/RAC1	4
BP	GO:0060425	lung morphogenesis	4/153	50/18670	0.000744969	0.002763897	0.001275666	FGFR2/MAPK1/MAP2K1/TGFBR2	4
BP	GO:0070741	response to interleukin-6	4/153	50/18670	0.000744969	0.002763897	0.001275666	FGG/JAK2/PTPN11/STAT1	4
BP	GO:1900087	positive regulation of G1/S transition of mitotic cell cycle	4/153	50/18670	0.000744969	0.002763897	0.001275666	AKT1/EGFR/MDM2/ADAM17	4
BP	GO:0006112	energy reserve metabolic process	5/153	87/18670	0.000745208	0.002763897	0.001275666	AKT1/AKT2/GSK3B/IGF1/INSR	5
BP	GO:1903317	regulation of protein maturation	7/153	182/18670	0.000764569	0.002833161	0.001307635	XIAP/F2/HPN/MDM2/PRKACA/SRC/BIRC7	7
BP	GO:0072503	cellular divalent inorganic cation homeostasis	12/153	493/18670	0.000767114	0.002840042	0.001310811	ABL1/ANXA5/ESR1/F2/IL2/JAK2/PIK3CG/PRKACA/S100A9/CCL5/TGM2/VDR	12
BP	GO:0045995	regulation of embryonic development	6/153	132/18670	0.000769722	0.002847144	0.001314089	AR/BMP7/FGFR1/IGF1/INSR/PRKACA	6
BP	GO:0061097	regulation of protein tyrosine kinase activity	5/153	88/18670	0.000784946	0.002898262	0.001337682	ACE/PTPN1/CCL5/SRC/ADAM17	5
BP	GO:1903725	regulation of phospholipid metabolic process	5/153	88/18670	0.000784946	0.002898262	0.001337682	KIT/PIK3R1/PTK2/SRC/TEK	5
BP	GO:0030258	lipid modification	8/153	238/18670	0.000785675	0.00289836	0.001337727	ABO/AKT1/AKT2/MAPK14/PIK3CG/PIK3R1/PPARA/PPARG	8
BP	GO:0031103	axon regeneration	4/153	51/18670	0.000803263	0.002957958	0.001365235	CTNNA1/DHFR/JAK2/MAP2K1	4
BP	GO:0048146	positive regulation of fibroblast proliferation	4/153	51/18670	0.000803263	0.002957958	0.001365235	CDK6/EGFR/ESR1/IGF1	4
BP	GO:2000045	regulation of G1/S transition of mitotic cell cycle	7/153	184/18670	0.000815293	0.002999582	0.001384446	AKT1/CDK2/CDK6/EGFR/MDM2/AURKA/ADAM17	7
BP	GO:0001654	eye development	10/153	362/18670	0.000819645	0.003010226	0.001389359	BMP7/EGFR/EPHA2/RARA/RARB/RARG/RBP4/TGFB2/TGFBR1/TGFBR2	10
BP	GO:0009141	nucleoside triphosphate metabolic process	10/153	362/18670	0.000819645	0.003010226	0.001389359	PARP1/ALDOA/RHOA/HSPA1A/HSPA8/IGF1/IMPDH1/INSR/PPARA/TYMS	10
BP	GO:0032465	regulation of cytokinesis	5/153	89/18670	0.000826245	0.003031768	0.001399301	RHOA/BCL2L1/CDC42/PLK1/AURKA	5
BP	GO:0032273	positive regulation of protein polymerization	6/153	134/18670	0.000832672	0.003052639	0.001408934	RHOA/GRB2/HSPA1A/HSP90AA1/MET/RAC1	6
BP	GO:0030111	regulation of Wnt signaling pathway	10/153	363/18670	0.000837041	0.003065931	0.001415069	ABL1/XIAP/BMP2/MAPK14/CSNK2A1/EGFR/ESR1/FGFR2/GSK3B/SRC	10
BP	GO:0032331	negative regulation of chondrocyte differentiation	3/153	23/18670	0.000847314	0.003098064	0.0014299	RARB/RARG/TGFBR1	3
BP	GO:0070977	bone maturation	3/153	23/18670	0.000847314	0.003098064	0.0014299	RHOA/BMP2/IGF1	3
BP	GO:0060359	response to ammonium ion	6/153	135/18670	0.0008656	0.003162123	0.001459466	ABL1/CASP3/CASP7/HSP90AB1/MDM2/MAPK1	6
BP	GO:0042475	odontogenesis of dentin-containing tooth	5/153	90/18670	0.000869143	0.003169454	0.00146285	BMP2/BMP7/CA2/CTNNA1/PPARA	5
BP	GO:0045778	positive regulation of ossification	5/153	90/18670	0.000869143	0.003169454	0.00146285	BMP2/BMP7/HGF/IGF1/TGFB2	5
BP	GO:0150063	visual system development	10/153	366/18670	0.000891063	0.00324652	0.001498419	BMP7/EGFR/EPHA2/RARA/RARB/RARG/RBP4/TGFB2/TGFBR1/TGFBR2	10
BP	GO:0048167	regulation of synaptic plasticity	7/153	187/18670	0.00089633	0.003259957	0.001504621	ABL1/GSK3B/HRAS/KIT/MME/MAPK1/RARA	7
BP	GO:1901343	negative regulation of vasculature development	7/153	187/18670	0.00089633	0.003259957	0.001504621	RHOA/BMP7/EPHA2/PPARG/STAT1/TEK/TGFB2	7
BP	GO:0007292	female gamete generation	6/153	136/18670	0.000899524	0.003268692	0.001508653	IGF1/NOS3/PGR/PLK1/SRC/AURKA	6
BP	GO:0060333	interferon-gamma-mediated signaling pathway	5/153	91/18670	0.000913679	0.003317208	0.001531045	HSP90AB1/JAK2/PPARG/STAT1/NR1H2	5
BP	GO:0009142	nucleoside triphosphate biosynthetic process	7/153	188/18670	0.00092471	0.003351364	0.00154681	PARP1/ALDOA/IGF1/IMPDH1/INSR/PPARA/TYMS	7
BP	GO:0051783	regulation of nuclear division	7/153	188/18670	0.00092471	0.003351364	0.00154681	BMP7/CHEK1/HSPA1A/IGF1/INSR/PLK1/AURKA	7
BP	GO:1905517	macrophage migration	4/153	53/18670	0.000929388	0.003365364	0.001553271	MAPK14/CYP19A1/LGALS3/CCL5	4
BP	GO:0035710	CD4-positive, alpha-beta T cell activation	5/153	92/18670	0.000959891	0.003470283	0.001601696	IL2/JAK3/RARA/RORA/TGFBR2	5
BP	GO:0046697	decidualization	3/153	24/18670	0.000962566	0.003470283	0.001601696	CTSB/MAPK1/VDR	3
BP	GO:0060343	trabecula formation	3/153	24/18670	0.000962566	0.003470283	0.001601696	MMP2/RBP4/TEK	3
BP	GO:0099563	modification of synaptic structure	3/153	24/18670	0.000962566	0.003470283	0.001601696	ABL1/RHOA/CDC42	3
BP	GO:1903649	regulation of cytoplasmic transport	3/153	24/18670	0.000962566	0.003470283	0.001601696	MAPK1/MAP2K1/SRC	3
BP	GO:0048880	sensory system development	10/153	371/18670	0.000987456	0.003556909	0.001641678	BMP7/EGFR/EPHA2/RARA/RARB/RARG/RBP4/TGFB2/TGFBR1/TGFBR2	10
BP	GO:0050994	regulation of lipid catabolic process	4/153	54/18670	0.000997403	0.00358648	0.001655326	AKT1/AKT2/PIK3CG/PPARA	4
BP	GO:0051353	positive regulation of oxidoreductase activity	4/153	54/18670	0.000997403	0.00358648	0.001655326	ABL1/AKT1/DHFR/VDR	4
BP	GO:0050715	positive regulation of cytokine secretion	6/153	139/18670	0.001007468	0.003616373	0.001669124	ABL1/CASP1/MAPK14/MMP12/SRC/SYK	6
BP	GO:0070665	positive regulation of leukocyte proliferation	6/153	139/18670	0.001007468	0.003616373	0.001669124	IGF1/IL2/JAK3/CCL5/SYK/TGFBR2	6
BP	GO:0045926	negative regulation of growth	8/153	249/18670	0.00105157	0.003771398	0.001740675	ESR2/HSPA1A/PPARA/PPARG/PTK2/RBP4/TGFB2/TGFBR2	8
BP	GO:0042113	B cell activation	9/153	310/18670	0.001055686	0.003782876	0.001745972	ABL1/BTK/CASP3/IL2/JAK3/KIT/PIK3R1/SYK/ADAM17	9
BP	GO:0002011	morphogenesis of an epithelial sheet	4/153	55/18670	0.001068842	0.003826695	0.001766197	RHOA/BMP7/MMP12/ADAM17	4
BP	GO:0002719	negative regulation of cytokine production involved in immune response	3/153	25/18670	0.001087284	0.003879264	0.00179046	HMOX1/JAK3/TGFB2	3
BP	GO:0031639	plasminogen activation	3/153	25/18670	0.001087284	0.003879264	0.00179046	FGG/HPN/PLAU	3
BP	GO:0034110	regulation of homotypic cell-cell adhesion	3/153	25/18670	0.001087284	0.003879264	0.00179046	FGG/CCL5/SYK	3
BP	GO:0060561	apoptotic process involved in morphogenesis	3/153	25/18670	0.001087284	0.003879264	0.00179046	BMP7/TGFB2/VDR	3
BP	GO:0044070	regulation of anion transport	5/153	95/18670	0.00110898	0.003946437	0.001821464	AKT1/AKT2/CA2/FGFR1/SYK	5
BP	GO:0060337	type I interferon signaling pathway	5/153	95/18670	0.00110898	0.003946437	0.001821464	HSP90AB1/MMP12/PTPN1/PTPN11/STAT1	5
BP	GO:0071357	cellular response to type I interferon	5/153	95/18670	0.00110898	0.003946437	0.001821464	HSP90AB1/MMP12/PTPN1/PTPN11/STAT1	5
BP	GO:0010332	response to gamma radiation	4/153	56/18670	0.001143798	0.004063336	0.001875418	PARP1/BCL2L1/HRAS/MDM2	4
BP	GO:1903202	negative regulation of oxidative stress-induced cell death	4/153	56/18670	0.001143798	0.004063336	0.001875418	AKT1/HGF/MET/SOD2	4
BP	GO:0043010	camera-type eye development	9/153	314/18670	0.001154333	0.004097237	0.001891065	BMP7/EGFR/EPHA2/RARA/RARG/RBP4/TGFB2/TGFBR1/TGFBR2	9
BP	GO:0019217	regulation of fatty acid metabolic process	5/153	96/18670	0.001162292	0.004118404	0.001900834	AKT1/AKT2/PPARA/PPARG/NR1H2	5
BP	GO:0090277	positive regulation of peptide hormone secretion	5/153	96/18670	0.001162292	0.004118404	0.001900834	EGFR/FGG/JAK2/RAC1/RBP4	5
BP	GO:0006606	protein import into nucleus	6/153	143/18670	0.001166572	0.004122954	0.001902934	AKT1/MAPK14/MMP12/PIK3R1/MAPK1/SYK	6
BP	GO:0106106	cold-induced thermogenesis	6/153	143/18670	0.001166572	0.004122954	0.001902934	IGF1R/JAK2/LCN2/SYK/ADAM17/NR1H2	6
BP	GO:0120161	regulation of cold-induced thermogenesis	6/153	143/18670	0.001166572	0.004122954	0.001902934	IGF1R/JAK2/LCN2/SYK/ADAM17/NR1H2	6
BP	GO:0051924	regulation of calcium ion transport	8/153	254/18670	0.001194109	0.004216667	0.001946187	ABL1/RHOA/F2/LGALS3/NOS3/PIK3CG/PRKACA/CCL5	8
BP	GO:0009156	ribonucleoside monophosphate biosynthetic process	7/153	197/18670	0.001213304	0.004265352	0.001968657	PARP1/ALDOA/IGF1/IMPDH1/INSR/PPARA/UMPS	7
BP	GO:0009749	response to glucose	7/153	197/18670	0.001213304	0.004265352	0.001968657	RHOA/CASP3/IGF1R/PRKACA/RAC1/RAF1/TGFBR2	7
BP	GO:0030316	osteoclast differentiation	5/153	97/18670	0.001217479	0.004265352	0.001968657	CA2/MAPK14/EPHA2/PIK3R1/SRC	5
BP	GO:0003081	regulation of systemic arterial blood pressure by renin-angiotensin	3/153	26/18670	0.001221756	0.004265352	0.001968657	RHOA/ACE/MME	3
BP	GO:0010758	regulation of macrophage chemotaxis	3/153	26/18670	0.001221756	0.004265352	0.001968657	MAPK14/CYP19A1/CCL5	3
BP	GO:0032800	receptor biosynthetic process	3/153	26/18670	0.001221756	0.004265352	0.001968657	JAK2/PPARA/PPARG	3
BP	GO:0043567	regulation of insulin-like growth factor receptor signaling pathway	3/153	26/18670	0.001221756	0.004265352	0.001968657	AR/BMP2/IGF1	3
BP	GO:0060037	pharyngeal system development	3/153	26/18670	0.001221756	0.004265352	0.001968657	BMP7/TGFB2/TGFBR1	3
BP	GO:1903579	negative regulation of ATP metabolic process	3/153	26/18670	0.001221756	0.004265352	0.001968657	PARP1/RHOA/PPARA	3
BP	GO:0045981	positive regulation of nucleotide metabolic process	4/153	57/18670	0.001222362	0.004265352	0.001968657	IGF1/INSR/NOS2/NOS3	4
BP	GO:0060760	positive regulation of response to cytokine stimulus	4/153	57/18670	0.001222362	0.004265352	0.001968657	CASP1/HSPA1A/MMP12/ADAM17	4
BP	GO:0071398	cellular response to fatty acid	4/153	57/18670	0.001222362	0.004265352	0.001968657	AKT1/PPARG/SRC/AKR1C3	4
BP	GO:1900408	negative regulation of cellular response to oxidative stress	4/153	57/18670	0.001222362	0.004265352	0.001968657	AKT1/HGF/MET/SOD2	4
BP	GO:1900544	positive regulation of purine nucleotide metabolic process	4/153	57/18670	0.001222362	0.004265352	0.001968657	IGF1/INSR/NOS2/NOS3	4
BP	GO:0009119	ribonucleoside metabolic process	5/153	98/18670	0.001274581	0.004443808	0.002051023	RHOA/IMPDH1/MTAP/UMPS/GMPR2	5
BP	GO:0033673	negative regulation of kinase activity	8/153	257/18670	0.001286774	0.004482533	0.002068897	ABL1/AKT1/BMP7/CASP3/GSTP1/IGF1R/PLK1/PTPN1	8
BP	GO:0002224	toll-like receptor signaling pathway	6/153	146/18670	0.001298022	0.004514098	0.002083465	BTK/CTSB/CTSL/ESR1/FGG/S100A9	6
BP	GO:0035264	multicellular organism growth	6/153	146/18670	0.001298022	0.004514098	0.002083465	AR/IGF1/PTPN11/RARA/RARB/RARG	6
BP	GO:0035306	positive regulation of dephosphorylation	4/153	58/18670	0.001304628	0.004521832	0.002087035	BMP2/HSP90AB1/JAK2/SRC	4
BP	GO:0042093	T-helper cell differentiation	4/153	58/18670	0.001304628	0.004521832	0.002087035	IL2/JAK3/RARA/RORA	4
BP	GO:0071385	cellular response to glucocorticoid stimulus	4/153	58/18670	0.001304628	0.004521832	0.002087035	EGFR/EIF4E/NR3C1/GSTP1	4
BP	GO:1904589	regulation of protein import	4/153	58/18670	0.001304628	0.004521832	0.002087035	MAPK14/HSPA8/PIK3R1/MAPK1	4
BP	GO:0019395	fatty acid oxidation	5/153	99/18670	0.001333638	0.004614633	0.002129867	AKT1/AKT2/MAPK14/PPARA/PPARG	5
BP	GO:0034340	response to type I interferon	5/153	99/18670	0.001333638	0.004614633	0.002129867	HSP90AB1/MMP12/PTPN1/PTPN11/STAT1	5
BP	GO:0006730	one-carbon metabolic process	3/153	27/18670	0.001366263	0.004699943	0.002169241	CA1/DHFR/TYMS	3
BP	GO:0035902	response to immobilization stress	3/153	27/18670	0.001366263	0.004699943	0.002169241	MDM2/PPARG/REG1A	3
BP	GO:0046885	regulation of hormone biosynthetic process	3/153	27/18670	0.001366263	0.004699943	0.002169241	BMP2/VDR/AKR1C3	3
BP	GO:0048799	animal organ maturation	3/153	27/18670	0.001366263	0.004699943	0.002169241	RHOA/BMP2/IGF1	3
BP	GO:1902175	regulation of oxidative stress-induced intrinsic apoptotic signaling pathway	3/153	27/18670	0.001366263	0.004699943	0.002169241	PARP1/AKT1/SOD2	3
BP	GO:1905208	negative regulation of cardiocyte differentiation	3/153	27/18670	0.001366263	0.004699943	0.002169241	BMP2/EGFR/PPARA	3
BP	GO:2000191	regulation of fatty acid transport	3/153	27/18670	0.001366263	0.004699943	0.002169241	AKT1/AKT2/SYK	3
BP	GO:0032970	regulation of actin filament-based process	10/153	388/18670	0.001381317	0.004747775	0.002191318	ABL1/RHOA/CDC42/GRB2/HRAS/MET/PIK3R1/RAC1/TEK/TGFBR1	10
BP	GO:0072659	protein localization to plasma membrane	8/153	260/18670	0.001385082	0.004751983	0.00219326	AKT1/AKT2/AR/BCL2L1/EGFR/EPHA2/LGALS3/PIK3R1	8
BP	GO:0010656	negative regulation of muscle cell apoptotic process	4/153	59/18670	0.001390686	0.004751983	0.00219326	BMP7/HMOX1/IGF1/JAK2	4
BP	GO:0045843	negative regulation of striated muscle tissue development	4/153	59/18670	0.001390686	0.004751983	0.00219326	BMP2/PPARA/RBP4/TGFBR2	4
BP	GO:0061077	chaperone-mediated protein folding	4/153	59/18670	0.001390686	0.004751983	0.00219326	BAG1/CSNK2A1/HSPA1A/HSPA8	4
BP	GO:0097755	positive regulation of blood vessel diameter	4/153	59/18670	0.001390686	0.004751983	0.00219326	EGFR/HMOX1/NOS3/SOD2	4
BP	GO:1902883	negative regulation of response to oxidative stress	4/153	59/18670	0.001390686	0.004751983	0.00219326	AKT1/HGF/MET/SOD2	4
BP	GO:0035107	appendage morphogenesis	6/153	148/18670	0.001391751	0.004751983	0.00219326	BMP7/FGFR1/FGFR2/RARB/RARG/TGFB2	6
BP	GO:0035108	limb morphogenesis	6/153	148/18670	0.001391751	0.004751983	0.00219326	BMP7/FGFR1/FGFR2/RARB/RARG/TGFB2	6
BP	GO:0120034	positive regulation of plasma membrane bounded cell projection assembly	5/153	100/18670	0.001394691	0.004758087	0.002196078	CDC42/HRAS/KIT/RAC1/TGFBR1	5
BP	GO:0006575	cellular modified amino acid metabolic process	7/153	202/18670	0.001401669	0.004766138	0.002199793	DHFR/FOLH1/GSTM1/GSTP1/HPN/PLA2G2A/TYMS	7
BP	GO:0009746	response to hexose	7/153	202/18670	0.001401669	0.004766138	0.002199793	RHOA/CASP3/IGF1R/PRKACA/RAC1/RAF1/TGFBR2	7
BP	GO:0050852	T cell receptor signaling pathway	7/153	202/18670	0.001401669	0.004766138	0.002199793	ABL1/BTK/HRAS/ITK/LGALS3/PIK3R1/MAPK1	7
BP	GO:1902806	regulation of cell cycle G1/S phase transition	7/153	202/18670	0.001401669	0.004766138	0.002199793	AKT1/CDK2/CDK6/EGFR/MDM2/AURKA/ADAM17	7
BP	GO:0006874	cellular calcium ion homeostasis	11/153	458/18670	0.00141263	0.004799456	0.002215171	ABL1/ANXA5/ESR1/F2/IL2/JAK2/PIK3CG/PRKACA/CCL5/TGM2/VDR	11
BP	GO:0110053	regulation of actin filament organization	8/153	261/18670	0.001419147	0.004817631	0.00222356	ABL1/RHOA/CDC42/GRB2/MET/PIK3R1/RAC1/TGFBR1	8
BP	GO:0007281	germ cell development	8/153	262/18670	0.001453876	0.00493147	0.002276102	AKT1/BCL2L1/IGF1/KIT/PRKACA/RARA/SRC/AURKA	8
BP	GO:0034440	lipid oxidation	5/153	101/18670	0.001457782	0.00494066	0.002280343	AKT1/AKT2/MAPK14/PPARA/PPARG	5
BP	GO:0002294	CD4-positive, alpha-beta T cell differentiation involved in immune response	4/153	60/18670	0.001480628	0.00500576	0.00231039	IL2/JAK3/RARA/RORA	4
BP	GO:0048635	negative regulation of muscle organ development	4/153	60/18670	0.001480628	0.00500576	0.00231039	BMP2/PPARA/RBP4/TGFBR2	4
BP	GO:1902808	positive regulation of cell cycle G1/S phase transition	4/153	60/18670	0.001480628	0.00500576	0.00231039	AKT1/EGFR/MDM2/ADAM17	4
BP	GO:0006760	folic acid-containing compound metabolic process	3/153	28/18670	0.001521074	0.005121527	0.002363822	DHFR/FOLH1/TYMS	3
BP	GO:0010818	T cell chemotaxis	3/153	28/18670	0.001521074	0.005121527	0.002363822	PIK3CG/CCL5/ADAM17	3
BP	GO:0033598	mammary gland epithelial cell proliferation	3/153	28/18670	0.001521074	0.005121527	0.002363822	EPHA2/ESR1/MAPK1	3
BP	GO:1900543	negative regulation of purine nucleotide metabolic process	3/153	28/18670	0.001521074	0.005121527	0.002363822	PARP1/RHOA/PPARA	3
BP	GO:1902745	positive regulation of lamellipodium organization	3/153	28/18670	0.001521074	0.005121527	0.002363822	CDC42/RAC1/SRC	3
BP	GO:0140014	mitotic nuclear division	8/153	264/18670	0.001525359	0.005131769	0.002368549	RHOA/BMP7/CHEK1/HSPA1A/IGF1/INSR/PLK1/AURKA	8
BP	GO:0019058	viral life cycle	9/153	328/18670	0.001559982	0.00524398	0.00242034	CDC42/CTSB/DPP4/EGFR/EPHA2/HSPA1A/HSP90AB1/PPIA/CCL5	9
BP	GO:0002287	alpha-beta T cell activation involved in immune response	4/153	61/18670	0.001574546	0.005275753	0.002435004	IL2/JAK3/RARA/RORA	4
BP	GO:0002293	alpha-beta T cell differentiation involved in immune response	4/153	61/18670	0.001574546	0.005275753	0.002435004	IL2/JAK3/RARA/RORA	4
BP	GO:0090303	positive regulation of wound healing	4/153	61/18670	0.001574546	0.005275753	0.002435004	F2/HRAS/PLG/TGFBR2	4
BP	GO:2000514	regulation of CD4-positive, alpha-beta T cell activation	4/153	61/18670	0.001574546	0.005275753	0.002435004	IL2/JAK3/RARA/TGFBR2	4
BP	GO:0044264	cellular polysaccharide metabolic process	5/153	103/18670	0.001590238	0.005319695	0.002455286	AKT1/AKT2/GSK3B/IGF1/INSR	5
BP	GO:1902106	negative regulation of leukocyte differentiation	5/153	103/18670	0.001590238	0.005319695	0.002455286	CDK6/IL2/JAK3/PIK3R1/RARA	5
BP	GO:0003012	muscle system process	11/153	465/18670	0.001592748	0.005323777	0.00245717	PARP1/ALDOA/RHOA/HMOX1/IGF1/KIT/NOS3/PIK3CG/PPARA/PRKACA/PTK2	11
BP	GO:0072331	signal transduction by p53 class mediator	8/153	267/18670	0.001637787	0.005469892	0.002524608	AKT1/CDK2/CHEK1/MAPK14/CSNK2A1/FHIT/MDM2/AURKA	8
BP	GO:0008630	intrinsic apoptotic signaling pathway in response to DNA damage	5/153	104/18670	0.001659687	0.005538551	0.002556298	ABL1/BCL2L1/EPHA2/HMOX1/PIK3R1	5
BP	GO:0046635	positive regulation of alpha-beta T cell activation	4/153	62/18670	0.001672531	0.005563425	0.002567778	RHOA/RARA/SYK/TGFBR2	4
BP	GO:0060393	regulation of pathway-restricted SMAD protein phosphorylation	4/153	62/18670	0.001672531	0.005563425	0.002567778	BMP2/BMP7/TGFB2/TGFBR1	4
BP	GO:0070059	intrinsic apoptotic signaling pathway in response to endoplasmic reticulum stress	4/153	62/18670	0.001672531	0.005563425	0.002567778	APAF1/BCL2L1/HSPA1A/PTPN1	4
BP	GO:1901862	negative regulation of muscle tissue development	4/153	62/18670	0.001672531	0.005563425	0.002567778	BMP2/PPARA/RBP4/TGFBR2	4
BP	GO:0007263	nitric oxide mediated signal transduction	3/153	29/18670	0.001686452	0.005578263	0.002574627	EGFR/NOS2/NOS3	3
BP	GO:0010800	positive regulation of peptidyl-threonine phosphorylation	3/153	29/18670	0.001686452	0.005578263	0.002574627	BMP7/PLK1/MAPK1	3
BP	GO:0031116	positive regulation of microtubule polymerization	3/153	29/18670	0.001686452	0.005578263	0.002574627	HSPA1A/MET/RAC1	3
BP	GO:0045822	negative regulation of heart contraction	3/153	29/18670	0.001686452	0.005578263	0.002574627	IL2/JAK2/PIK3CG	3
BP	GO:0045980	negative regulation of nucleotide metabolic process	3/153	29/18670	0.001686452	0.005578263	0.002574627	PARP1/RHOA/PPARA	3
BP	GO:0070102	interleukin-6-mediated signaling pathway	3/153	29/18670	0.001686452	0.005578263	0.002574627	JAK2/PTPN11/STAT1	3
BP	GO:0070229	negative regulation of lymphocyte apoptotic process	3/153	29/18670	0.001686452	0.005578263	0.002574627	IL2/JAK3/CCL5	3
BP	GO:0035303	regulation of dephosphorylation	7/153	209/18670	0.001702939	0.00562326	0.002595395	BMP2/GSK3B/HSP90AB1/JAK2/LGALS3/SRC/TGFB2	7
BP	GO:0010770	positive regulation of cell morphogenesis involved in differentiation	6/153	154/18670	0.001704142	0.00562326	0.002595395	ABL1/RHOA/CDC42/FGG/MAP2K1/RAC1	6
BP	GO:1990845	adaptive thermogenesis	6/153	154/18670	0.001704142	0.00562326	0.002595395	IGF1R/JAK2/LCN2/SYK/ADAM17/NR1H2	6
BP	GO:2000401	regulation of lymphocyte migration	4/153	63/18670	0.001774674	0.005851323	0.002700656	AKT1/RHOA/CCL5/ADAM17	4
BP	GO:0009205	purine ribonucleoside triphosphate metabolic process	9/153	335/18670	0.001801972	0.005936585	0.002740009	PARP1/ALDOA/RHOA/HSPA1A/HSPA8/IGF1/IMPDH1/INSR/PPARA	9
BP	GO:0002286	T cell activation involved in immune response	5/153	106/18670	0.001805232	0.005942583	0.002742777	IL2/JAK3/LGALS3/RARA/RORA	5
BP	GO:0021696	cerebellar cortex morphogenesis	3/153	30/18670	0.001862651	0.0061121	0.002821017	MAP2K1/PTPN11/RORA	3
BP	GO:0061082	myeloid leukocyte cytokine production	3/153	30/18670	0.001862651	0.0061121	0.002821017	HMOX1/KIT/TGFB2	3
BP	GO:0071480	cellular response to gamma radiation	3/153	30/18670	0.001862651	0.0061121	0.002821017	BCL2L1/HRAS/MDM2	3
BP	GO:0071549	cellular response to dexamethasone stimulus	3/153	30/18670	0.001862651	0.0061121	0.002821017	EGFR/EIF4E/NR3C1	3
BP	GO:0030032	lamellipodium assembly	4/153	64/18670	0.001881066	0.00614436	0.002835907	CDC42/EPHA2/KIT/RAC1	4
BP	GO:0043297	apical junction assembly	4/153	64/18670	0.001881066	0.00614436	0.002835907	RHOA/CTNNA1/EPHA2/PRKACA	4
BP	GO:0045600	positive regulation of fat cell differentiation	4/153	64/18670	0.001881066	0.00614436	0.002835907	AKT1/BMP2/MAPK14/PPARG	4
BP	GO:0045669	positive regulation of osteoblast differentiation	4/153	64/18670	0.001881066	0.00614436	0.002835907	BMP2/BMP7/HGF/IGF1	4
BP	GO:1903672	positive regulation of sprouting angiogenesis	4/153	64/18670	0.001881066	0.00614436	0.002835907	ABL1/FGF1/HMOX1/KDR	4
BP	GO:0043502	regulation of muscle adaptation	5/153	107/18670	0.001881412	0.00614436	0.002835907	PARP1/IGF1/NOS3/PPARA/PTK2	5
BP	GO:0006275	regulation of DNA replication	5/153	108/18670	0.00195992	0.006395692	0.002951908	CDK2/EGFR/FGFR1/HRAS/RAC1	5
BP	GO:0051187	cofactor catabolic process	4/153	65/18670	0.001991796	0.006489449	0.002995181	BLVRB/CAT/HMOX1/PRDX5	4
BP	GO:0072678	T cell migration	4/153	65/18670	0.001991796	0.006489449	0.002995181	RHOA/PIK3CG/CCL5/ADAM17	4
BP	GO:0009199	ribonucleoside triphosphate metabolic process	9/153	341/18670	0.002032552	0.006616148	0.003053659	PARP1/ALDOA/RHOA/HSPA1A/HSPA8/IGF1/IMPDH1/INSR/PPARA	9
BP	GO:1901987	regulation of cell cycle phase transition	11/153	480/18670	0.002042504	0.006616148	0.003053659	AKT1/CDK2/CDK6/CHEK1/EGFR/HSP90AA1/MDM2/PLK1/PRKACA/AURKA/ADAM17	11
BP	GO:0003401	axis elongation	3/153	31/18670	0.002049916	0.006616148	0.003053659	ESR1/FGF1/FGFR2	3
BP	GO:0034694	response to prostaglandin	3/153	31/18670	0.002049916	0.006616148	0.003053659	AKT1/PPARG/AKR1C3	3
BP	GO:0044319	wound healing, spreading of cells	3/153	31/18670	0.002049916	0.006616148	0.003053659	RHOA/MMP12/ADAM17	3
BP	GO:0045648	positive regulation of erythrocyte differentiation	3/153	31/18670	0.002049916	0.006616148	0.003053659	MAPK14/HSPA1A/STAT1	3
BP	GO:0045742	positive regulation of epidermal growth factor receptor signaling pathway	3/153	31/18670	0.002049916	0.006616148	0.003053659	AKT1/MMP9/ADAM17	3
BP	GO:0050482	arachidonic acid secretion	3/153	31/18670	0.002049916	0.006616148	0.003053659	ACE/PLA2G2A/SYK	3
BP	GO:0090505	epiboly involved in wound healing	3/153	31/18670	0.002049916	0.006616148	0.003053659	RHOA/MMP12/ADAM17	3
BP	GO:1902895	positive regulation of pri-miRNA transcription by RNA polymerase II	3/153	31/18670	0.002049916	0.006616148	0.003053659	BMP2/NR3C1/TGFB2	3
BP	GO:1903963	arachidonate transport	3/153	31/18670	0.002049916	0.006616148	0.003053659	ACE/PLA2G2A/SYK	3
BP	GO:2000406	positive regulation of T cell migration	3/153	31/18670	0.002049916	0.006616148	0.003053659	RHOA/CCL5/ADAM17	3
BP	GO:0002699	positive regulation of immune effector process	7/153	216/18670	0.00205236	0.006618862	0.003054911	BTK/MAPK14/HMOX1/IL2/RARA/RBP4/SYK	7
BP	GO:0009144	purine nucleoside triphosphate metabolic process	9/153	342/18670	0.002073177	0.006680775	0.003083487	PARP1/ALDOA/RHOA/HSPA1A/HSPA8/IGF1/IMPDH1/INSR/PPARA	9
BP	GO:0021872	forebrain generation of neurons	4/153	66/18670	0.002106954	0.006773757	0.003126403	RHOA/ERBB4/FGFR1/FGFR2	4
BP	GO:0046626	regulation of insulin receptor signaling pathway	4/153	66/18670	0.002106954	0.006773757	0.003126403	PIK3R1/PTPN1/PTPN11/SRC	4
BP	GO:1904888	cranial skeletal system development	4/153	66/18670	0.002106954	0.006773757	0.003126403	FGFR2/TGFB2/TGFBR1/TGFBR2	4
BP	GO:0019722	calcium-mediated signaling	7/153	218/18670	0.002161731	0.006939057	0.003202696	BTK/EGFR/GSK3B/IGF1/KDR/PRKACA/SYK	7
BP	GO:0032271	regulation of protein polymerization	7/153	218/18670	0.002161731	0.006939057	0.003202696	ABL1/RHOA/GRB2/HSPA1A/HSP90AA1/MET/RAC1	7
BP	GO:0060047	heart contraction	8/153	280/18670	0.00220313	0.007066449	0.003261493	ACE/IL2/JAK2/MDM2/NOS3/PIK3CG/PRKACA/TGFB2	8
BP	GO:0072676	lymphocyte migration	5/153	111/18670	0.002209829	0.007082432	0.00326887	AKT1/RHOA/PIK3CG/CCL5/ADAM17	5
BP	GO:0043583	ear development	7/153	219/18670	0.00221808	0.007103363	0.003278531	BMP2/FGFR1/FGFR2/HPN/MAPK1/PTPN11/TGFB2	7
BP	GO:0048662	negative regulation of smooth muscle cell proliferation	4/153	67/18670	0.002226629	0.007125213	0.003288616	GSTP1/HMOX1/PPARG/SOD2	4
BP	GO:0008210	estrogen metabolic process	3/153	32/18670	0.002248485	0.007145302	0.003297888	CYP19A1/HSD17B1/SULT1A1	3
BP	GO:0051085	chaperone cofactor-dependent protein refolding	3/153	32/18670	0.002248485	0.007145302	0.003297888	BAG1/HSPA1A/HSPA8	3
BP	GO:0055022	negative regulation of cardiac muscle tissue growth	3/153	32/18670	0.002248485	0.007145302	0.003297888	PPARA/RBP4/TGFBR2	3
BP	GO:0055094	response to lipoprotein particle	3/153	32/18670	0.002248485	0.007145302	0.003297888	AKT1/PPARG/SYK	3
BP	GO:0060674	placenta blood vessel development	3/153	32/18670	0.002248485	0.007145302	0.003297888	AKT1/MAPK1/MAP2K1	3
BP	GO:0061117	negative regulation of heart growth	3/153	32/18670	0.002248485	0.007145302	0.003297888	PPARA/RBP4/TGFBR2	3
BP	GO:0071295	cellular response to vitamin	3/153	32/18670	0.002248485	0.007145302	0.003297888	MDM2/PPARG/VDR	3
BP	GO:0090504	epiboly	3/153	32/18670	0.002248485	0.007145302	0.003297888	RHOA/MMP12/ADAM17	3
BP	GO:1902235	regulation of endoplasmic reticulum stress-induced intrinsic apoptotic signaling pathway	3/153	32/18670	0.002248485	0.007145302	0.003297888	BCL2L1/HSPA1A/PTPN1	3
BP	GO:0010976	positive regulation of neuron projection development	8/153	281/18670	0.002252269	0.007151821	0.003300897	RHOA/BMP7/FGFR1/HGF/IL2/MAP2K1/REG1A/S100A9	8
BP	GO:0051170	import into nucleus	6/153	163/18670	0.0022692	0.007200045	0.003323154	AKT1/MAPK14/MMP12/PIK3R1/MAPK1/SYK	6
BP	GO:0002292	T cell differentiation involved in immune response	4/153	68/18670	0.002350911	0.007447859	0.003437532	IL2/JAK3/RARA/RORA	4
BP	GO:0071242	cellular response to ammonium ion	4/153	68/18670	0.002350911	0.007447859	0.003437532	ABL1/CASP3/CASP7/MAPK1	4
BP	GO:0032609	interferon-gamma production	5/153	113/18670	0.002388844	0.00756223	0.003490319	ABL1/HRAS/IL2/ITK/RARA	5
BP	GO:0007093	mitotic cell cycle checkpoint	6/153	165/18670	0.002411944	0.007629506	0.00352137	BCL2L1/CDK2/HRAS/MDM2/PLK1/AURKA	6
BP	GO:0010591	regulation of lamellipodium assembly	3/153	33/18670	0.002458588	0.007729665	0.003567598	CDC42/EPHA2/RAC1	3
BP	GO:0031112	positive regulation of microtubule polymerization or depolymerization	3/153	33/18670	0.002458588	0.007729665	0.003567598	HSPA1A/MET/RAC1	3
BP	GO:0032633	interleukin-4 production	3/153	33/18670	0.002458588	0.007729665	0.003567598	ITK/RARA/SYK	3
BP	GO:0033028	myeloid cell apoptotic process	3/153	33/18670	0.002458588	0.007729665	0.003567598	CTSL/CCL5/ADAM17	3
BP	GO:0036314	response to sterol	3/153	33/18670	0.002458588	0.007729665	0.003567598	RORA/TGFBR1/TGFBR2	3
BP	GO:0070232	regulation of T cell apoptotic process	3/153	33/18670	0.002458588	0.007729665	0.003567598	JAK3/LGALS3/CCL5	3
BP	GO:1901186	positive regulation of ERBB signaling pathway	3/153	33/18670	0.002458588	0.007729665	0.003567598	AKT1/MMP9/ADAM17	3
BP	GO:2001024	negative regulation of response to drug	3/153	33/18670	0.002458588	0.007729665	0.003567598	HGF/MET/PTPN11	3
BP	GO:0003002	regionalization	9/153	351/18670	0.002468763	0.00774985	0.003576915	AR/BMP2/FGF1/FGFR1/FGFR2/PRKACA/RARG/AURKA/TGFBR1	9
BP	GO:0051260	protein homooligomerization	9/153	351/18670	0.002468763	0.00774985	0.003576915	ALDOA/APAF1/CAT/HMOX1/LCN2/REG1A/SOD2/SRC/TGM2	9
BP	GO:0055008	cardiac muscle tissue morphogenesis	4/153	69/18670	0.002479887	0.007756645	0.003580051	BMP2/FGFR2/TGFB2/TGFBR1	4
BP	GO:2000243	positive regulation of reproductive process	4/153	69/18670	0.002479887	0.007756645	0.003580051	AR/INSR/SRC/AURKA	4
BP	GO:0002688	regulation of leukocyte chemotaxis	5/153	114/18670	0.002482201	0.007756645	0.003580051	MAPK14/CYP19A1/RAC1/CCL5/ADAM17	5
BP	GO:0005976	polysaccharide metabolic process	5/153	114/18670	0.002482201	0.007756645	0.003580051	AKT1/AKT2/GSK3B/IGF1/INSR	5
BP	GO:0030282	bone mineralization	5/153	114/18670	0.002482201	0.007756645	0.003580051	BMP2/BMP7/FGFR2/IGF1/MMP13	5
BP	GO:0042752	regulation of circadian rhythm	5/153	114/18670	0.002482201	0.007756645	0.003580051	GSK3B/PPARA/PPARG/MAPK8/RORA	5
BP	GO:0090288	negative regulation of cellular response to growth factor stimulus	6/153	166/18670	0.002485801	0.007762017	0.00358253	ABL1/HSPA1A/PTPN1/ADAM17/TGFBR1/TGFBR2	6
BP	GO:0007004	telomere maintenance via telomerase	4/153	70/18670	0.002613646	0.00815505	0.003763933	HSP90AA1/HSP90AB1/MAPK1/SRC	4
BP	GO:0050806	positive regulation of synaptic transmission	6/153	168/18670	0.002638605	0.008220498	0.003794141	ABL1/CA2/EGFR/GSK3B/MME/MAPK1	6
BP	GO:1990138	neuron projection extension	6/153	168/18670	0.002638605	0.008220498	0.003794141	ABL1/GSK3B/HSP90AA1/HSP90AB1/REG1A/AURKA	6
BP	GO:0006417	regulation of translation	10/153	424/18670	0.002641132	0.008222168	0.003794911	AKT1/AKT2/RHOA/DAPK1/DHFR/EIF4E/MAPK1/RARA/CCL5/TYMS	10
BP	GO:0021782	glial cell development	5/153	116/18670	0.002676828	0.008282094	0.00382257	AKT1/AKT2/CDK6/EGFR/GSTP1	5
BP	GO:0003382	epithelial cell morphogenesis	3/153	34/18670	0.002680445	0.008282094	0.00382257	AR/MET/ST14	3
BP	GO:0010922	positive regulation of phosphatase activity	3/153	34/18670	0.002680445	0.008282094	0.00382257	BMP2/HSP90AB1/JAK2	3
BP	GO:0042558	pteridine-containing compound metabolic process	3/153	34/18670	0.002680445	0.008282094	0.00382257	DHFR/FOLH1/TYMS	3
BP	GO:0043094	cellular metabolic compound salvage	3/153	34/18670	0.002680445	0.008282094	0.00382257	TYMP/MTAP/GMPR2	3
BP	GO:0043276	anoikis	3/153	34/18670	0.002680445	0.008282094	0.00382257	AKT1/PTK2/SRC	3
BP	GO:0048048	embryonic eye morphogenesis	3/153	34/18670	0.002680445	0.008282094	0.00382257	BMP7/RARB/RARG	3
BP	GO:0048566	embryonic digestive tract development	3/153	34/18670	0.002680445	0.008282094	0.00382257	FGFR2/RARB/TGFB2	3
BP	GO:0071868	cellular response to monoamine stimulus	3/153	34/18670	0.002680445	0.008282094	0.00382257	ABL1/PRKACA/MAPK1	3
BP	GO:0071870	cellular response to catecholamine stimulus	3/153	34/18670	0.002680445	0.008282094	0.00382257	ABL1/PRKACA/MAPK1	3
BP	GO:0006457	protein folding	7/153	227/18670	0.002710786	0.008369577	0.003862947	BAG1/CSNK2A1/HSPA1A/HSPA8/HSP90AA1/HSP90AB1/PPIA	7
BP	GO:0001933	negative regulation of protein phosphorylation	10/153	429/18670	0.002872354	0.008760697	0.004043467	ABL1/AKT1/BMP7/CASP3/GSTP1/HGF/IGF1R/IL2/PLK1/PTPN1	10
BP	GO:0010918	positive regulation of mitochondrial membrane potential	2/153	10/18670	0.002875665	0.008760697	0.004043467	AKT1/AKT2	2
BP	GO:0031284	positive regulation of guanylate cyclase activity	2/153	10/18670	0.002875665	0.008760697	0.004043467	NOS2/NOS3	2
BP	GO:0032000	positive regulation of fatty acid beta-oxidation	2/153	10/18670	0.002875665	0.008760697	0.004043467	AKT2/PPARA	2
BP	GO:0033483	gas homeostasis	2/153	10/18670	0.002875665	0.008760697	0.004043467	GSTP1/SOD2	2
BP	GO:0033690	positive regulation of osteoblast proliferation	2/153	10/18670	0.002875665	0.008760697	0.004043467	ABL1/BMP2	2
BP	GO:0035768	endothelial cell chemotaxis to fibroblast growth factor	2/153	10/18670	0.002875665	0.008760697	0.004043467	FGF1/FGFR1	2
BP	GO:0045792	negative regulation of cell size	2/153	10/18670	0.002875665	0.008760697	0.004043467	AKT1/RHOA	2
BP	GO:0051901	positive regulation of mitochondrial depolarization	2/153	10/18670	0.002875665	0.008760697	0.004043467	PARP1/KDR	2
BP	GO:0051918	negative regulation of fibrinolysis	2/153	10/18670	0.002875665	0.008760697	0.004043467	F2/PLG	2
BP	GO:0060068	vagina development	2/153	10/18670	0.002875665	0.008760697	0.004043467	ESR1/RBP4	2
BP	GO:0060281	regulation of oocyte development	2/153	10/18670	0.002875665	0.008760697	0.004043467	IGF1/AURKA	2
BP	GO:0060513	prostatic bud formation	2/153	10/18670	0.002875665	0.008760697	0.004043467	AR/BMP7	2
BP	GO:0071104	response to interleukin-9	2/153	10/18670	0.002875665	0.008760697	0.004043467	JAK3/STAT1	2
BP	GO:0072203	cell proliferation involved in metanephros development	2/153	10/18670	0.002875665	0.008760697	0.004043467	BMP7/STAT1	2
BP	GO:1903800	positive regulation of production of miRNAs involved in gene silencing by miRNA	2/153	10/18670	0.002875665	0.008760697	0.004043467	EGFR/MAP2K1	2
BP	GO:1905879	regulation of oogenesis	2/153	10/18670	0.002875665	0.008760697	0.004043467	IGF1/AURKA	2
BP	GO:2000544	regulation of endothelial cell chemotaxis to fibroblast growth factor	2/153	10/18670	0.002875665	0.008760697	0.004043467	FGF1/FGFR1	2
BP	GO:0009206	purine ribonucleoside triphosphate biosynthetic process	6/153	171/18670	0.002880901	0.008763714	0.00404486	PARP1/ALDOA/IGF1/IMPDH1/INSR/PPARA	6
BP	GO:0016241	regulation of macroautophagy	6/153	171/18670	0.002880901	0.008763714	0.00404486	AKT1/CASP3/HMOX1/KDR/PRKACA/MAPK8	6
BP	GO:0051146	striated muscle cell differentiation	8/153	293/18670	0.002911867	0.008819731	0.004070714	AKT1/BMP2/CASP3/MAPK14/IGF1/PPARA/RARA/RARB	8
BP	GO:0002701	negative regulation of production of molecular mediator of immune response	3/153	35/18670	0.002914272	0.008819731	0.004070714	HMOX1/JAK3/TGFB2	3
BP	GO:0021955	central nervous system neuron axonogenesis	3/153	35/18670	0.002914272	0.008819731	0.004070714	HSP90AA1/HSP90AB1/PTK2	3
BP	GO:0042455	ribonucleoside biosynthetic process	3/153	35/18670	0.002914272	0.008819731	0.004070714	IMPDH1/MTAP/UMPS	3
BP	GO:0045622	regulation of T-helper cell differentiation	3/153	35/18670	0.002914272	0.008819731	0.004070714	IL2/JAK3/RARA	3
BP	GO:0098751	bone cell development	3/153	35/18670	0.002914272	0.008819731	0.004070714	KIT/PTPN11/SRC	3
BP	GO:0110111	negative regulation of animal organ morphogenesis	3/153	35/18670	0.002914272	0.008819731	0.004070714	BMP7/STAT1/TGFB2	3
BP	GO:0009145	purine nucleoside triphosphate biosynthetic process	6/153	172/18670	0.002965255	0.008954332	0.004132839	PARP1/ALDOA/IGF1/IMPDH1/INSR/PPARA	6
BP	GO:0021543	pallium development	6/153	172/18670	0.002965255	0.008954332	0.004132839	RHOA/CASP3/CDK6/EGFR/GSK3B/RARA	6
BP	GO:0032874	positive regulation of stress-activated MAPK cascade	6/153	172/18670	0.002965255	0.008954332	0.004132839	BMP2/HRAS/PTPN1/SYK/TGFB2/BIRC7	6
BP	GO:0010948	negative regulation of cell cycle process	9/153	361/18670	0.002976372	0.008981334	0.004145302	APAF1/BMP7/CDK2/CDK6/CHEK1/HSP90AB1/MDM2/PLK1/AURKA	9
BP	GO:0051193	regulation of cofactor metabolic process	5/153	119/18670	0.002989186	0.009013411	0.004160107	IGF1/INSR/MMP3/PPARA/RAC1	5
BP	GO:0016236	macroautophagy	8/153	295/18670	0.003035096	0.009145164	0.004220917	AKT1/CASP3/CSNK2A1/HMOX1/KDR/PRKACA/MAPK8/SRC	8
BP	GO:0003208	cardiac ventricle morphogenesis	4/153	73/18670	0.003044487	0.00916009	0.004227806	FGFR2/TGFB2/TGFBR1/TGFBR2	4
BP	GO:0046128	purine ribonucleoside metabolic process	4/153	73/18670	0.003044487	0.00916009	0.004227806	RHOA/IMPDH1/MTAP/GMPR2	4
BP	GO:0001659	temperature homeostasis	6/153	173/18670	0.003051444	0.009160989	0.004228221	IGF1R/JAK2/LCN2/SYK/ADAM17/NR1H2	6
BP	GO:0016525	negative regulation of angiogenesis	6/153	173/18670	0.003051444	0.009160989	0.004228221	RHOA/EPHA2/PPARG/STAT1/TEK/TGFB2	6
BP	GO:0070304	positive regulation of stress-activated protein kinase signaling cascade	6/153	173/18670	0.003051444	0.009160989	0.004228221	BMP2/HRAS/PTPN1/SYK/TGFB2/BIRC7	6
BP	GO:0002698	negative regulation of immune effector process	5/153	120/18670	0.00309892	0.009290008	0.004287769	HMOX1/IL2/JAK3/LGALS3/TGFB2	5
BP	GO:0017015	regulation of transforming growth factor beta receptor signaling pathway	5/153	120/18670	0.00309892	0.009290008	0.004287769	HSPA1A/HSP90AB1/ADAM17/TGFBR1/TGFBR2	5
BP	GO:0006816	calcium ion transport	10/153	434/18670	0.003119514	0.009344959	0.004313131	ABL1/ANXA5/RHOA/F2/LGALS3/NOS3/PIK3CG/PRKACA/CCL5/VDR	10
BP	GO:0034390	smooth muscle cell apoptotic process	3/153	36/18670	0.003160273	0.009432832	0.004353689	IGF1/PPARG/SOD2	3
BP	GO:0034391	regulation of smooth muscle cell apoptotic process	3/153	36/18670	0.003160273	0.009432832	0.004353689	IGF1/PPARG/SOD2	3
BP	GO:0042554	superoxide anion generation	3/153	36/18670	0.003160273	0.009432832	0.004353689	EGFR/GSTP1/SYK	3
BP	GO:0051973	positive regulation of telomerase activity	3/153	36/18670	0.003160273	0.009432832	0.004353689	HSP90AA1/HSP90AB1/MAPK1	3
BP	GO:0097242	amyloid-beta clearance	3/153	36/18670	0.003160273	0.009432832	0.004353689	IGF1R/INSR/MME	3
BP	GO:0031670	cellular response to nutrient	4/153	74/18670	0.003198243	0.009518634	0.00439329	HMOX1/MDM2/PPARG/VDR	4
BP	GO:0043367	CD4-positive, alpha-beta T cell differentiation	4/153	74/18670	0.003198243	0.009518634	0.00439329	IL2/JAK3/RARA/RORA	4
BP	GO:1900076	regulation of cellular response to insulin stimulus	4/153	74/18670	0.003198243	0.009518634	0.00439329	PIK3R1/PTPN1/PTPN11/SRC	4
BP	GO:1903036	positive regulation of response to wounding	4/153	74/18670	0.003198243	0.009518634	0.00439329	F2/HRAS/PLG/TGFBR2	4
BP	GO:0071453	cellular response to oxygen levels	7/153	234/18670	0.003207351	0.009538864	0.004402627	AKT1/BMP7/HMOX1/MDM2/PPARG/RORA/SRC	7
BP	GO:0002695	negative regulation of leukocyte activation	6/153	175/18670	0.003229426	0.009576919	0.004420192	BTK/CASP3/HMOX1/IL2/JAK3/LGALS3	6
BP	GO:0010921	regulation of phosphatase activity	6/153	175/18670	0.003229426	0.009576919	0.004420192	BMP2/GSK3B/HSP90AB1/JAK2/LGALS3/TGFB2	6
BP	GO:0120032	regulation of plasma membrane bounded cell projection assembly	6/153	175/18670	0.003229426	0.009576919	0.004420192	CDC42/EPHA2/HRAS/KIT/RAC1/TGFBR1	6
BP	GO:2000181	negative regulation of blood vessel morphogenesis	6/153	175/18670	0.003229426	0.009576919	0.004420192	RHOA/EPHA2/PPARG/STAT1/TEK/TGFB2	6
BP	GO:0006986	response to unfolded protein	6/153	176/18670	0.003321269	0.009838198	0.004540784	HSPA1A/HSPA8/HSP90AA1/HSP90AB1/PIK3R1/PTPN1	6
BP	GO:0019730	antimicrobial humoral response	5/153	122/18670	0.003327065	0.009838198	0.004540784	F2/LCN2/PLA2G2A/REG1A/S100A9	5
BP	GO:1903578	regulation of ATP metabolic process	5/153	122/18670	0.003327065	0.009838198	0.004540784	PARP1/RHOA/IGF1/INSR/PPARA	5
BP	GO:1903844	regulation of cellular response to transforming growth factor beta stimulus	5/153	122/18670	0.003327065	0.009838198	0.004540784	HSPA1A/HSP90AB1/ADAM17/TGFBR1/TGFBR2	5
BP	GO:0010611	regulation of cardiac muscle hypertrophy	4/153	75/18670	0.003357211	0.009920233	0.004578647	PARP1/IGF1/PPARA/PTK2	4
BP	GO:0006164	purine nucleotide biosynthetic process	8/153	300/18670	0.003360996	0.009924314	0.00458053	PARP1/ALDOA/IGF1/IMPDH1/INSR/NOS2/NOS3/PPARA	8
BP	GO:0009201	ribonucleoside triphosphate biosynthetic process	6/153	177/18670	0.003415045	0.010037112	0.004632592	PARP1/ALDOA/IGF1/IMPDH1/INSR/PPARA	6
BP	GO:0031076	embryonic camera-type eye development	3/153	37/18670	0.003418648	0.010037112	0.004632592	BMP7/RARA/RARG	3
BP	GO:0042307	positive regulation of protein import into nucleus	3/153	37/18670	0.003418648	0.010037112	0.004632592	MAPK14/PIK3R1/MAPK1	3
BP	GO:0045730	respiratory burst	3/153	37/18670	0.003418648	0.010037112	0.004632592	INSR/PIK3CG/RAC1	3
BP	GO:0046006	regulation of activated T cell proliferation	3/153	37/18670	0.003418648	0.010037112	0.004632592	CASP3/IGF1/IL2	3
BP	GO:0051084	'de novo' posttranslational protein folding	3/153	37/18670	0.003418648	0.010037112	0.004632592	BAG1/HSPA1A/HSPA8	3
BP	GO:0090050	positive regulation of cell migration involved in sprouting angiogenesis	3/153	37/18670	0.003418648	0.010037112	0.004632592	ABL1/HMOX1/KDR	3
BP	GO:2000403	positive regulation of lymphocyte migration	3/153	37/18670	0.003418648	0.010037112	0.004632592	RHOA/CCL5/ADAM17	3
BP	GO:0010769	regulation of cell morphogenesis involved in differentiation	8/153	301/18670	0.003429321	0.010061291	0.004643752	ABL1/RHOA/CDC42/FGG/GSK3B/MAP2K1/PTK2/RAC1	8
BP	GO:0016264	gap junction assembly	2/153	11/18670	0.003495846	0.010141146	0.004680608	CTNNA1/ACE	2
BP	GO:0032351	negative regulation of hormone metabolic process	2/153	11/18670	0.003495846	0.010141146	0.004680608	BMP2/AKR1C3	2
BP	GO:0033148	positive regulation of intracellular estrogen receptor signaling pathway	2/153	11/18670	0.003495846	0.010141146	0.004680608	PARP1/AR	2
BP	GO:0033632	regulation of cell-cell adhesion mediated by integrin	2/153	11/18670	0.003495846	0.010141146	0.004680608	DPP4/CCL5	2
BP	GO:0035747	natural killer cell chemotaxis	2/153	11/18670	0.003495846	0.010141146	0.004680608	PIK3CG/CCL5	2
BP	GO:0035766	cell chemotaxis to fibroblast growth factor	2/153	11/18670	0.003495846	0.010141146	0.004680608	FGF1/FGFR1	2
BP	GO:0051024	positive regulation of immunoglobulin secretion	2/153	11/18670	0.003495846	0.010141146	0.004680608	IL2/RBP4	2
BP	GO:0051974	negative regulation of telomerase activity	2/153	11/18670	0.003495846	0.010141146	0.004680608	PPARG/SRC	2
BP	GO:0060525	prostate glandular acinus development	2/153	11/18670	0.003495846	0.010141146	0.004680608	ESR1/FGFR2	2
BP	GO:0061307	cardiac neural crest cell differentiation involved in heart development	2/153	11/18670	0.003495846	0.010141146	0.004680608	BMP7/MAPK1	2
BP	GO:0061308	cardiac neural crest cell development involved in heart development	2/153	11/18670	0.003495846	0.010141146	0.004680608	BMP7/MAPK1	2
BP	GO:0070106	interleukin-27-mediated signaling pathway	2/153	11/18670	0.003495846	0.010141146	0.004680608	JAK2/STAT1	2
BP	GO:0070757	interleukin-35-mediated signaling pathway	2/153	11/18670	0.003495846	0.010141146	0.004680608	JAK2/STAT1	2
BP	GO:0071803	positive regulation of podosome assembly	2/153	11/18670	0.003495846	0.010141146	0.004680608	RHOA/SRC	2
BP	GO:0072584	caveolin-mediated endocytosis	2/153	11/18670	0.003495846	0.010141146	0.004680608	MAPK1/SRC	2
BP	GO:1904847	regulation of cell chemotaxis to fibroblast growth factor	2/153	11/18670	0.003495846	0.010141146	0.004680608	FGF1/FGFR1	2
BP	GO:0050821	protein stabilization	6/153	178/18670	0.003510781	0.010177321	0.004697305	CDK7/HSPA1A/HSP90AA1/HSP90AB1/IGF1/PIK3R1	6
BP	GO:0042278	purine nucleoside metabolic process	4/153	76/18670	0.003521475	0.010186861	0.004701708	RHOA/IMPDH1/MTAP/GMPR2	4
BP	GO:0046785	microtubule polymerization	4/153	76/18670	0.003521475	0.010186861	0.004701708	ABL1/HSPA1A/MET/RAC1	4
BP	GO:0046902	regulation of mitochondrial membrane permeability	4/153	76/18670	0.003521475	0.010186861	0.004701708	BCL2L1/GSK3B/HSPA1A/MAPK8	4
BP	GO:0007043	cell-cell junction assembly	5/153	124/18670	0.003567063	0.01031151	0.004759239	RHOA/CTNNA1/ACE/EPHA2/PRKACA	5
BP	GO:1901990	regulation of mitotic cell cycle phase transition	10/153	444/18670	0.003664741	0.010586459	0.004886141	AKT1/CDK2/CDK6/EGFR/HSP90AA1/MDM2/PLK1/PRKACA/AURKA/ADAM17	10
BP	GO:0050663	cytokine secretion	7/153	240/18670	0.003685904	0.010589978	0.004887765	ABL1/CASP1/MAPK14/MMP12/NOS2/SRC/SYK	7
BP	GO:0045022	early endosome to late endosome transport	3/153	38/18670	0.003689589	0.010589978	0.004887765	MAPK1/MAP2K1/SRC	3
BP	GO:0071867	response to monoamine	3/153	38/18670	0.003689589	0.010589978	0.004887765	ABL1/PRKACA/MAPK1	3
BP	GO:0071869	response to catecholamine	3/153	38/18670	0.003689589	0.010589978	0.004887765	ABL1/PRKACA/MAPK1	3
BP	GO:1902742	apoptotic process involved in development	3/153	38/18670	0.003689589	0.010589978	0.004887765	BMP7/TGFB2/VDR	3
BP	GO:1903523	negative regulation of blood circulation	3/153	38/18670	0.003689589	0.010589978	0.004887765	IL2/JAK2/PIK3CG	3
BP	GO:0032481	positive regulation of type I interferon production	4/153	77/18670	0.00369112	0.010589978	0.004887765	MMP12/PTPN11/STAT1/SYK	4
BP	GO:0048678	response to axon injury	4/153	77/18670	0.00369112	0.010589978	0.004887765	CTNNA1/DHFR/JAK2/MAP2K1	4
BP	GO:0030326	embryonic limb morphogenesis	5/153	125/18670	0.003691613	0.010589978	0.004887765	BMP7/FGFR1/RARB/RARG/TGFB2	5
BP	GO:0035113	embryonic appendage morphogenesis	5/153	125/18670	0.003691613	0.010589978	0.004887765	BMP7/FGFR1/RARB/RARG/TGFB2	5
BP	GO:0046034	ATP metabolic process	8/153	305/18670	0.003713481	0.010645313	0.004913305	PARP1/ALDOA/RHOA/HSPA1A/HSPA8/IGF1/INSR/PPARA	8
BP	GO:0044282	small molecule catabolic process	10/153	445/18670	0.003723182	0.010665716	0.004922722	AKT1/AKT2/ALDH2/ALDOA/TYMP/NOS2/NOS3/PPARA/SULT1A1/AKR1C3	10
BP	GO:0002285	lymphocyte activation involved in immune response	6/153	181/18670	0.003809991	0.010906827	0.005034006	ABL1/IL2/JAK3/LGALS3/RARA/RORA	6
BP	GO:0048706	embryonic skeletal system development	5/153	126/18670	0.003819253	0.010918198	0.005039254	BMP7/FGFR2/RBP4/TGFBR1/TGFBR2	5
BP	GO:0090101	negative regulation of transmembrane receptor protein serine/threonine kinase signaling pathway	5/153	126/18670	0.003819253	0.010918198	0.005039254	ABL1/HSPA1A/ADAM17/TGFBR1/TGFBR2	5
BP	GO:0008589	regulation of smoothened signaling pathway	4/153	78/18670	0.003866228	0.011014349	0.005083632	CTNNA1/FGFR2/PRKACA/RORA	4
BP	GO:0014743	regulation of muscle hypertrophy	4/153	78/18670	0.003866228	0.011014349	0.005083632	PARP1/IGF1/PPARA/PTK2	4
BP	GO:0021954	central nervous system neuron development	4/153	78/18670	0.003866228	0.011014349	0.005083632	FGFR2/HSP90AA1/HSP90AB1/PTK2	4
BP	GO:0070664	negative regulation of leukocyte proliferation	4/153	78/18670	0.003866228	0.011014349	0.005083632	BTK/CASP3/GSTP1/IL2	4
BP	GO:0072028	nephron morphogenesis	4/153	78/18670	0.003866228	0.011014349	0.005083632	BMP2/BMP7/FGF1/STAT1	4
BP	GO:0007257	activation of JUN kinase activity	3/153	39/18670	0.003973279	0.01128816	0.005210009	PTPN1/SYK/BIRC7	3
BP	GO:0019048	modulation by virus of host morphology or physiology	3/153	39/18670	0.003973279	0.01128816	0.005210009	BCL2L1/INSR/TYMS	3
BP	GO:1904591	positive regulation of protein import	3/153	39/18670	0.003973279	0.01128816	0.005210009	MAPK14/PIK3R1/MAPK1	3
BP	GO:1905521	regulation of macrophage migration	3/153	39/18670	0.003973279	0.01128816	0.005210009	MAPK14/CYP19A1/CCL5	3
BP	GO:0009127	purine nucleoside monophosphate biosynthetic process	6/153	183/18670	0.004019718	0.011388741	0.005256431	PARP1/ALDOA/IGF1/IMPDH1/INSR/PPARA	6
BP	GO:0009168	purine ribonucleoside monophosphate biosynthetic process	6/153	183/18670	0.004019718	0.011388741	0.005256431	PARP1/ALDOA/IGF1/IMPDH1/INSR/PPARA	6
BP	GO:0021953	central nervous system neuron differentiation	6/153	183/18670	0.004019718	0.011388741	0.005256431	ERBB4/FGFR2/HSP90AA1/HSP90AB1/PTK2/RORA	6
BP	GO:0043123	positive regulation of I-kappaB kinase/NF-kappaB signaling	6/153	183/18670	0.004019718	0.011388741	0.005256431	ABL1/AKT1/RHOA/CASP1/HMOX1/TGM2	6
BP	GO:0001570	vasculogenesis	4/153	79/18670	0.004046881	0.011449983	0.005284698	EPHA2/KDR/PTK2/TGFBR2	4
BP	GO:0031110	regulation of microtubule polymerization or depolymerization	4/153	79/18670	0.004046881	0.011449983	0.005284698	ABL1/HSPA1A/MET/RAC1	4
BP	GO:0043409	negative regulation of MAPK cascade	6/153	184/18670	0.004127732	0.011559851	0.005335406	ABL1/AKT1/BMP7/GSTP1/IGF1R/PTPN1	6
BP	GO:0002002	regulation of angiotensin levels in blood	2/153	12/18670	0.004172524	0.011559851	0.005335406	ACE/MME	2
BP	GO:0002003	angiotensin maturation	2/153	12/18670	0.004172524	0.011559851	0.005335406	ACE/MME	2
BP	GO:0002371	dendritic cell cytokine production	2/153	12/18670	0.004172524	0.011559851	0.005335406	JAK3/KIT	2
BP	GO:0002551	mast cell chemotaxis	2/153	12/18670	0.004172524	0.011559851	0.005335406	KIT/RAC1	2
BP	GO:0002674	negative regulation of acute inflammatory response	2/153	12/18670	0.004172524	0.011559851	0.005335406	GSTP1/PPARG	2
BP	GO:0006068	ethanol catabolic process	2/153	12/18670	0.004172524	0.011559851	0.005335406	ALDH2/SULT1A1	2
BP	GO:0006069	ethanol oxidation	2/153	12/18670	0.004172524	0.011559851	0.005335406	ADH1C/ALDH2	2
BP	GO:0006527	arginine catabolic process	2/153	12/18670	0.004172524	0.011559851	0.005335406	NOS2/NOS3	2
BP	GO:0009642	response to light intensity	2/153	12/18670	0.004172524	0.011559851	0.005335406	AKT2/CAT	2
BP	GO:0010889	regulation of sequestering of triglyceride	2/153	12/18670	0.004172524	0.011559851	0.005335406	PPARA/PPARG	2
BP	GO:0031282	regulation of guanylate cyclase activity	2/153	12/18670	0.004172524	0.011559851	0.005335406	NOS2/NOS3	2
BP	GO:0033197	response to vitamin E	2/153	12/18670	0.004172524	0.011559851	0.005335406	CAT/PPARG	2
BP	GO:0035630	bone mineralization involved in bone maturation	2/153	12/18670	0.004172524	0.011559851	0.005335406	BMP2/IGF1	2
BP	GO:0042659	regulation of cell fate specification	2/153	12/18670	0.004172524	0.011559851	0.005335406	AR/FGFR1	2
BP	GO:0045579	positive regulation of B cell differentiation	2/153	12/18670	0.004172524	0.011559851	0.005335406	BTK/SYK	2
BP	GO:0050910	detection of mechanical stimulus involved in sensory perception of sound	2/153	12/18670	0.004172524	0.011559851	0.005335406	HPN/KIT	2
BP	GO:0060391	positive regulation of SMAD protein signal transduction	2/153	12/18670	0.004172524	0.011559851	0.005335406	PARP1/TGFBR1	2
BP	GO:0060742	epithelial cell differentiation involved in prostate gland development	2/153	12/18670	0.004172524	0.011559851	0.005335406	AR/FGFR2	2
BP	GO:0070486	leukocyte aggregation	2/153	12/18670	0.004172524	0.011559851	0.005335406	BMP7/S100A9	2
BP	GO:0071888	macrophage apoptotic process	2/153	12/18670	0.004172524	0.011559851	0.005335406	CTSL/CCL5	2
BP	GO:0097284	hepatocyte apoptotic process	2/153	12/18670	0.004172524	0.011559851	0.005335406	BCL2L1/PIK3CG	2
BP	GO:0097340	inhibition of cysteine-type endopeptidase activity	2/153	12/18670	0.004172524	0.011559851	0.005335406	XIAP/BIRC7	2
BP	GO:0097341	zymogen inhibition	2/153	12/18670	0.004172524	0.011559851	0.005335406	XIAP/BIRC7	2
BP	GO:0097531	mast cell migration	2/153	12/18670	0.004172524	0.011559851	0.005335406	KIT/RAC1	2
BP	GO:1901298	regulation of hydrogen peroxide-mediated programmed cell death	2/153	12/18670	0.004172524	0.011559851	0.005335406	HGF/MET	2
BP	GO:1904181	positive regulation of membrane depolarization	2/153	12/18670	0.004172524	0.011559851	0.005335406	PARP1/KDR	2
BP	GO:1905244	regulation of modification of synaptic structure	2/153	12/18670	0.004172524	0.011559851	0.005335406	ABL1/RHOA	2
BP	GO:1905461	positive regulation of vascular associated smooth muscle cell apoptotic process	2/153	12/18670	0.004172524	0.011559851	0.005335406	PPARG/SOD2	2
BP	GO:2000105	positive regulation of DNA-dependent DNA replication	2/153	12/18670	0.004172524	0.011559851	0.005335406	CDK2/FGFR1	2
BP	GO:2000121	regulation of removal of superoxide radicals	2/153	12/18670	0.004172524	0.011559851	0.005335406	BMP7/DHFR	2
BP	GO:0050853	B cell receptor signaling pathway	5/153	129/18670	0.004221141	0.011686699	0.005393953	ABL1/BTK/ITK/MAPK1/SYK	5
BP	GO:0071548	response to dexamethasone	3/153	40/18670	0.004269897	0.01180585	0.005448947	EGFR/EIF4E/NR3C1	3
BP	GO:2000008	regulation of protein localization to cell surface	3/153	40/18670	0.004269897	0.01180585	0.005448947	AKT1/ERBB4/HSP90AB1	3
BP	GO:0021766	hippocampus development	4/153	81/18670	0.004425145	0.012210561	0.005635739	CASP3/CDK6/GSK3B/RARA	4
BP	GO:0030512	negative regulation of transforming growth factor beta receptor signaling pathway	4/153	81/18670	0.004425145	0.012210561	0.005635739	HSPA1A/ADAM17/TGFBR1/TGFBR2	4
BP	GO:0034109	homotypic cell-cell adhesion	4/153	81/18670	0.004425145	0.012210561	0.005635739	FGG/PIK3CG/CCL5/SYK	4
BP	GO:0006458	'de novo' protein folding	3/153	41/18670	0.004579612	0.012557737	0.005795977	BAG1/HSPA1A/HSPA8	3
BP	GO:0010955	negative regulation of protein processing	3/153	41/18670	0.004579612	0.012557737	0.005795977	XIAP/MDM2/BIRC7	3
BP	GO:0042572	retinol metabolic process	3/153	41/18670	0.004579612	0.012557737	0.005795977	ADH1C/RBP4/AKR1C3	3
BP	GO:0098927	vesicle-mediated transport between endosomal compartments	3/153	41/18670	0.004579612	0.012557737	0.005795977	MAPK1/MAP2K1/SRC	3
BP	GO:0150077	regulation of neuroinflammatory response	3/153	41/18670	0.004579612	0.012557737	0.005795977	IGF1/MMP3/MMP9	3
BP	GO:1900117	regulation of execution phase of apoptosis	3/153	41/18670	0.004579612	0.012557737	0.005795977	APAF1/BCL2L1/FAP	3
BP	GO:1903053	regulation of extracellular matrix organization	3/153	41/18670	0.004579612	0.012557737	0.005795977	ABL1/DPP4/FAP	3
BP	GO:1903318	negative regulation of protein maturation	3/153	41/18670	0.004579612	0.012557737	0.005795977	XIAP/MDM2/BIRC7	3
BP	GO:1905209	positive regulation of cardiocyte differentiation	3/153	41/18670	0.004579612	0.012557737	0.005795977	BMP7/IGF1/TGFB2	3
BP	GO:0043902	positive regulation of multi-organism process	6/153	188/18670	0.004581384	0.012557737	0.005795977	HPN/NOS2/PPIA/CCL5/AURKA/SYK	6
BP	GO:0006898	receptor-mediated endocytosis	8/153	316/18670	0.00458956	0.012563464	0.00579862	ALB/GRB2/HSP90AA1/INSR/RAC1/SYK/TGFBR2/TNK2	8
BP	GO:0050851	antigen receptor-mediated signaling pathway	8/153	316/18670	0.00458956	0.012563464	0.00579862	ABL1/BTK/HRAS/ITK/LGALS3/PIK3R1/MAPK1/SYK	8
BP	GO:0051702	interaction with symbiont	4/153	82/18670	0.004622916	0.012629649	0.005829168	F2/HPN/PLG/CCL5	4
BP	GO:0060415	muscle tissue morphogenesis	4/153	82/18670	0.004622916	0.012629649	0.005829168	BMP2/FGFR2/TGFB2/TGFBR1	4
BP	GO:0090049	regulation of cell migration involved in sprouting angiogenesis	4/153	82/18670	0.004622916	0.012629649	0.005829168	ABL1/RHOA/HMOX1/KDR	4
BP	GO:0042177	negative regulation of protein catabolic process	5/153	132/18670	0.004652362	0.012684907	0.005854672	CSNK2A1/EGFR/FHIT/HSP90AB1/NOS2	5
BP	GO:0045598	regulation of fat cell differentiation	5/153	132/18670	0.004652362	0.012684907	0.005854672	AKT1/BMP2/MAPK14/PPARG/RORA	5
BP	GO:0055007	cardiac muscle cell differentiation	5/153	132/18670	0.004652362	0.012684907	0.005854672	BMP2/IGF1/PPARA/RARA/RARB	5
BP	GO:0008016	regulation of heart contraction	7/153	251/18670	0.004702271	0.012812524	0.005913573	IL2/JAK2/MDM2/NOS3/PIK3CG/PRKACA/TGFB2	7
BP	GO:0007224	smoothened signaling pathway	5/153	133/18670	0.004802817	0.013077854	0.006036035	CTNNA1/FGFR2/PRKACA/RORA/TGFBR2	5
BP	GO:1903845	negative regulation of cellular response to transforming growth factor beta stimulus	4/153	83/18670	0.004826552	0.013133822	0.006061867	HSPA1A/ADAM17/TGFBR1/TGFBR2	4
BP	GO:0046394	carboxylic acid biosynthetic process	10/153	462/18670	0.004835061	0.013148308	0.006068553	ALDOA/DHFR/FOLH1/IGF1/INSR/MTAP/PPARA/SYK/NR1H2/AKR1C3	10
BP	GO:0007204	positive regulation of cytosolic calcium ion concentration	8/153	319/18670	0.004854047	0.013181162	0.006083717	ABL1/ESR1/F2/IL2/JAK2/PIK3CG/PRKACA/TGM2	8
BP	GO:0010613	positive regulation of cardiac muscle hypertrophy	3/153	42/18670	0.004902588	0.013181162	0.006083717	PARP1/IGF1/PTK2	3
BP	GO:0042181	ketone biosynthetic process	3/153	42/18670	0.004902588	0.013181162	0.006083717	BMP2/CYP19A1/AKR1C3	3
BP	GO:0003084	positive regulation of systemic arterial blood pressure	2/153	13/18670	0.004904744	0.013181162	0.006083717	RHOA/ACE	2
BP	GO:0006703	estrogen biosynthetic process	2/153	13/18670	0.004904744	0.013181162	0.006083717	CYP19A1/HSD17B1	2
BP	GO:0007494	midgut development	2/153	13/18670	0.004904744	0.013181162	0.006083717	EGFR/REG1A	2
BP	GO:0030656	regulation of vitamin metabolic process	2/153	13/18670	0.004904744	0.013181162	0.006083717	VDR/AKR1C3	2
BP	GO:0031274	positive regulation of pseudopodium assembly	2/153	13/18670	0.004904744	0.013181162	0.006083717	CDC42/KIT	2
BP	GO:0032488	Cdc42 protein signal transduction	2/153	13/18670	0.004904744	0.013181162	0.006083717	ABL1/CDC42	2
BP	GO:0035723	interleukin-15-mediated signaling pathway	2/153	13/18670	0.004904744	0.013181162	0.006083717	GRB2/JAK3	2
BP	GO:0042178	xenobiotic catabolic process	2/153	13/18670	0.004904744	0.013181162	0.006083717	GSTM1/GSTP1	2
BP	GO:0043568	positive regulation of insulin-like growth factor receptor signaling pathway	2/153	13/18670	0.004904744	0.013181162	0.006083717	AR/IGF1	2
BP	GO:0060347	heart trabecula formation	2/153	13/18670	0.004904744	0.013181162	0.006083717	RBP4/TEK	2
BP	GO:0071350	cellular response to interleukin-15	2/153	13/18670	0.004904744	0.013181162	0.006083717	GRB2/JAK3	2
BP	GO:0090399	replicative senescence	2/153	13/18670	0.004904744	0.013181162	0.006083717	CHEK1/MME	2
BP	GO:1900103	positive regulation of endoplasmic reticulum unfolded protein response	2/153	13/18670	0.004904744	0.013181162	0.006083717	PIK3R1/PTPN1	2
BP	GO:1903960	negative regulation of anion transmembrane transport	2/153	13/18670	0.004904744	0.013181162	0.006083717	AKT1/AKT2	2
BP	GO:2000194	regulation of female gonad development	2/153	13/18670	0.004904744	0.013181162	0.006083717	INSR/SRC	2
BP	GO:0016053	organic acid biosynthetic process	10/153	463/18670	0.004907811	0.013181162	0.006083717	ALDOA/DHFR/FOLH1/IGF1/INSR/MTAP/PPARA/SYK/NR1H2/AKR1C3	10
BP	GO:0042594	response to starvation	6/153	191/18670	0.004945002	0.01327241	0.006125832	ALB/HSPA8/PPARG/MAPK1/MAPK8/AKR1C3	6
BP	GO:0007006	mitochondrial membrane organization	5/153	134/18670	0.004956698	0.013295159	0.006136332	BCL2L1/GSK3B/HSPA1A/HSP90AA1/MAPK8	5
BP	GO:1905897	regulation of response to endoplasmic reticulum stress	4/153	84/18670	0.005036131	0.013499448	0.00623062	BCL2L1/HSPA1A/PIK3R1/PTPN1	4
BP	GO:0043112	receptor metabolic process	6/153	192/18670	0.005070796	0.013574737	0.00626537	GRB2/JAK2/PPARA/PPARG/PTPN1/SYK	6
BP	GO:0048839	inner ear development	6/153	192/18670	0.005070796	0.013574737	0.00626537	BMP2/FGFR1/FGFR2/HPN/PTPN11/TGFB2	6
BP	GO:0007611	learning or memory	7/153	256/18670	0.005228579	0.01398806	0.006456137	CASP3/EGFR/INSR/KIT/MME/NQO2/MAPK1	7
BP	GO:0001953	negative regulation of cell-matrix adhesion	3/153	43/18670	0.005238983	0.013988694	0.00645643	MMP12/PIK3R1/SRC	3
BP	GO:0014742	positive regulation of muscle hypertrophy	3/153	43/18670	0.005238983	0.013988694	0.00645643	PARP1/IGF1/PTK2	3
BP	GO:0045746	negative regulation of Notch signaling pathway	3/153	43/18670	0.005238983	0.013988694	0.00645643	AKT1/BMP7/EGFR	3
BP	GO:0010959	regulation of metal ion transport	9/153	394/18670	0.005259116	0.014033375	0.006477052	ABL1/AKT1/RHOA/F2/LGALS3/NOS3/PIK3CG/PRKACA/CCL5	9
BP	GO:1903670	regulation of sprouting angiogenesis	5/153	137/18670	0.005439319	0.01450485	0.00669466	ABL1/RHOA/FGF1/HMOX1/KDR	5
BP	GO:0032760	positive regulation of tumor necrosis factor production	4/153	86/18670	0.005473424	0.014567566	0.006723606	JAK2/PIK3R1/PTPN11/SYK	4
BP	GO:0060291	long-term synaptic potentiation	4/153	86/18670	0.005473424	0.014567566	0.006723606	ABL1/GSK3B/MME/MAPK1	4
BP	GO:0090559	regulation of membrane permeability	4/153	86/18670	0.005473424	0.014567566	0.006723606	BCL2L1/GSK3B/HSPA1A/MAPK8	4
BP	GO:0009615	response to virus	8/153	326/18670	0.005516683	0.01467324	0.00677238	BCL2L1/CDK6/MAPK14/LCN2/MMP12/CCL5/SRC/STAT1	8
BP	GO:0030225	macrophage differentiation	3/153	44/18670	0.005588946	0.014817705	0.006839057	PARP1/CDC42/MMP9	3
BP	GO:0071622	regulation of granulocyte chemotaxis	3/153	44/18670	0.005588946	0.014817705	0.006839057	MAPK14/RAC1/CCL5	3
BP	GO:1901028	regulation of mitochondrial outer membrane permeabilization involved in apoptotic signaling pathway	3/153	44/18670	0.005588946	0.014817705	0.006839057	GSK3B/HSPA1A/MAPK8	3
BP	GO:1903573	negative regulation of response to endoplasmic reticulum stress	3/153	44/18670	0.005588946	0.014817705	0.006839057	BCL2L1/HSPA1A/PTPN1	3
BP	GO:2000404	regulation of T cell migration	3/153	44/18670	0.005588946	0.014817705	0.006839057	RHOA/CCL5/ADAM17	3
BP	GO:0006694	steroid biosynthetic process	6/153	196/18670	0.005597583	0.01483108	0.00684523	BMP2/CYP19A1/FGF1/HSD17B1/VDR/AKR1C3	6
BP	GO:0007100	mitotic centrosome separation	2/153	14/18670	0.005691562	0.01493628	0.006893785	CHEK1/AURKA	2
BP	GO:0010421	hydrogen peroxide-mediated programmed cell death	2/153	14/18670	0.005691562	0.01493628	0.006893785	HGF/MET	2
BP	GO:0031272	regulation of pseudopodium assembly	2/153	14/18670	0.005691562	0.01493628	0.006893785	CDC42/KIT	2
BP	GO:0035112	genitalia morphogenesis	2/153	14/18670	0.005691562	0.01493628	0.006893785	AR/RBP4	2
BP	GO:0038166	angiotensin-activated signaling pathway	2/153	14/18670	0.005691562	0.01493628	0.006893785	CA2/SRC	2
BP	GO:0045198	establishment of epithelial cell apical/basal polarity	2/153	14/18670	0.005691562	0.01493628	0.006893785	RHOA/CDC42	2
BP	GO:0046037	GMP metabolic process	2/153	14/18670	0.005691562	0.01493628	0.006893785	IMPDH1/GMPR2	2
BP	GO:0048308	organelle inheritance	2/153	14/18670	0.005691562	0.01493628	0.006893785	MAPK1/MAP2K1	2
BP	GO:0048313	Golgi inheritance	2/153	14/18670	0.005691562	0.01493628	0.006893785	MAPK1/MAP2K1	2
BP	GO:0051712	positive regulation of killing of cells of other organism	2/153	14/18670	0.005691562	0.01493628	0.006893785	NOS2/SYK	2
BP	GO:0070672	response to interleukin-15	2/153	14/18670	0.005691562	0.01493628	0.006893785	GRB2/JAK3	2
BP	GO:0072425	signal transduction involved in G2 DNA damage checkpoint	2/153	14/18670	0.005691562	0.01493628	0.006893785	CHEK1/PLK1	2
BP	GO:0097468	programmed cell death in response to reactive oxygen species	2/153	14/18670	0.005691562	0.01493628	0.006893785	HGF/MET	2
BP	GO:1903054	negative regulation of extracellular matrix organization	2/153	14/18670	0.005691562	0.01493628	0.006893785	DPP4/FAP	2
BP	GO:1903351	cellular response to dopamine	2/153	14/18670	0.005691562	0.01493628	0.006893785	ABL1/MAPK1	2
BP	GO:0002690	positive regulation of leukocyte chemotaxis	4/153	87/18670	0.00570129	0.014952303	0.00690118	MAPK14/RAC1/CCL5/ADAM17	4
BP	GO:0031333	negative regulation of protein complex assembly	5/153	139/18670	0.005778958	0.015146374	0.006990753	ALB/CDC42/GSK3B/RAF1/SRC	5
BP	GO:0046890	regulation of lipid biosynthetic process	6/153	198/18670	0.005875497	0.015389627	0.007103026	AKT1/BMP2/FGF1/NR1H2/VDR/AKR1C3	6
BP	GO:0042742	defense response to bacterium	8/153	330/18670	0.005925166	0.015493328	0.007150888	EPHA2/F2/LCN2/NOS2/PLA2G2A/S100A9/SYK/ADAM17	8
BP	GO:0043506	regulation of JUN kinase activity	4/153	88/18670	0.005935402	0.015493328	0.007150888	GSTP1/PTPN1/SYK/BIRC7	4
BP	GO:0048644	muscle organ morphogenesis	4/153	88/18670	0.005935402	0.015493328	0.007150888	BMP2/FGFR2/TGFB2/TGFBR1	4
BP	GO:0106027	neuron projection organization	4/153	88/18670	0.005935402	0.015493328	0.007150888	CDC42/GSK3B/IGF1R/INSR	4
BP	GO:1903557	positive regulation of tumor necrosis factor superfamily cytokine production	4/153	88/18670	0.005935402	0.015493328	0.007150888	JAK2/PIK3R1/PTPN11/SYK	4
BP	GO:0031018	endocrine pancreas development	3/153	45/18670	0.005952621	0.015493328	0.007150888	AKT1/CDK6/GSK3B	3
BP	GO:0032570	response to progesterone	3/153	45/18670	0.005952621	0.015493328	0.007150888	SRC/TGFB2/TYMS	3
BP	GO:0048701	embryonic cranial skeleton morphogenesis	3/153	45/18670	0.005952621	0.015493328	0.007150888	FGFR2/TGFBR1/TGFBR2	3
BP	GO:0071827	plasma lipoprotein particle organization	3/153	45/18670	0.005952621	0.015493328	0.007150888	ALB/PLA2G2A/PRKACA	3
BP	GO:1900271	regulation of long-term synaptic potentiation	3/153	45/18670	0.005952621	0.015493328	0.007150888	ABL1/GSK3B/MME	3
BP	GO:0035966	response to topologically incorrect protein	6/153	199/18670	0.006018173	0.015648309	0.007222419	HSPA1A/HSPA8/HSP90AA1/HSP90AB1/PIK3R1/PTPN1	6
BP	GO:0010498	proteasomal protein catabolic process	10/153	477/18670	0.006019747	0.015648309	0.007222419	AKT1/CDK2/FHIT/GSK3B/HSPA1A/HSP90AB1/MDM2/PLK1/PRKACA/AURKA	10
BP	GO:0097306	cellular response to alcohol	4/153	89/18670	0.006175833	0.01604395	0.007405026	AKT1/CTNNA1/PPARG/AKR1C3	4
BP	GO:0015849	organic acid transport	8/153	333/18670	0.006246362	0.016206776	0.007480178	AKT1/AKT2/ACE/NOS2/PLA2G2A/PPARA/PPARG/SYK	8
BP	GO:0046942	carboxylic acid transport	8/153	333/18670	0.006246362	0.016206776	0.007480178	AKT1/AKT2/ACE/NOS2/PLA2G2A/PPARA/PPARG/SYK	8
BP	GO:0043900	regulation of multi-organism process	9/153	405/18670	0.006264657	0.016244034	0.007497374	HPN/IGF1/MMP12/NOS2/PPIA/CCL5/STAT1/AURKA/SYK	9
BP	GO:0072006	nephron development	5/153	142/18670	0.006316074	0.016352216	0.007547305	BMP2/BMP7/FGF1/STAT1/TEK	5
BP	GO:0010883	regulation of lipid storage	3/153	46/18670	0.006330146	0.016352216	0.007547305	PPARA/PPARG/NR1H2	3
BP	GO:0035196	production of miRNAs involved in gene silencing by miRNA	3/153	46/18670	0.006330146	0.016352216	0.007547305	EGFR/ESR1/MAP2K1	3
BP	GO:0044003	modification by symbiont of host morphology or physiology	3/153	46/18670	0.006330146	0.016352216	0.007547305	BCL2L1/INSR/TYMS	3
BP	GO:0071675	regulation of mononuclear cell migration	3/153	46/18670	0.006330146	0.016352216	0.007547305	MAPK14/LGALS3/CCL5	3
BP	GO:1900015	regulation of cytokine production involved in inflammatory response	3/153	46/18670	0.006330146	0.016352216	0.007547305	MAPK14/F2/NOS2	3
BP	GO:0044839	cell cycle G2/M phase transition	7/153	266/18670	0.006412719	0.016555163	0.007640974	CDK2/CDK7/CHEK1/HSP90AA1/PLK1/PRKACA/AURKA	7
BP	GO:0030901	midbrain development	4/153	90/18670	0.006422655	0.016560101	0.007643253	RHOA/CDC42/FGFR1/FGFR2	4
BP	GO:0032651	regulation of interleukin-1 beta production	4/153	90/18670	0.006422655	0.016560101	0.007643253	CASP1/GSTP1/IGF1/JAK2	4
BP	GO:0015711	organic anion transport	10/153	482/18670	0.006461375	0.016649536	0.007684532	AKT1/AKT2/CA1/CA2/ACE/NOS2/PLA2G2A/PPARA/PPARG/SYK	10
BP	GO:0060070	canonical Wnt signaling pathway	8/153	335/18670	0.006467739	0.016654903	0.007687009	XIAP/BMP2/MAPK14/EGFR/FGFR2/GSK3B/RARG/SRC	8
BP	GO:0010759	positive regulation of macrophage chemotaxis	2/153	15/18670	0.006532047	0.016654903	0.007687009	MAPK14/CCL5	2
BP	GO:0030238	male sex determination	2/153	15/18670	0.006532047	0.016654903	0.007687009	AR/INSR	2
BP	GO:0030730	sequestering of triglyceride	2/153	15/18670	0.006532047	0.016654903	0.007687009	PPARA/PPARG	2
BP	GO:0036445	neuronal stem cell division	2/153	15/18670	0.006532047	0.016654903	0.007687009	FGFR1/FGFR2	2
BP	GO:0042976	activation of Janus kinase activity	2/153	15/18670	0.006532047	0.016654903	0.007687009	JAK2/CCL5	2
BP	GO:0043101	purine-containing compound salvage	2/153	15/18670	0.006532047	0.016654903	0.007687009	MTAP/GMPR2	2
BP	GO:0045838	positive regulation of membrane potential	2/153	15/18670	0.006532047	0.016654903	0.007687009	AKT1/AKT2	2
BP	GO:0051299	centrosome separation	2/153	15/18670	0.006532047	0.016654903	0.007687009	CHEK1/AURKA	2
BP	GO:0055057	neuroblast division	2/153	15/18670	0.006532047	0.016654903	0.007687009	FGFR1/FGFR2	2
BP	GO:0071801	regulation of podosome assembly	2/153	15/18670	0.006532047	0.016654903	0.007687009	RHOA/SRC	2
BP	GO:0072075	metanephric mesenchyme development	2/153	15/18670	0.006532047	0.016654903	0.007687009	BMP7/STAT1	2
BP	GO:0090136	epithelial cell-cell adhesion	2/153	15/18670	0.006532047	0.016654903	0.007687009	CTNNA1/KIT	2
BP	GO:1903350	response to dopamine	2/153	15/18670	0.006532047	0.016654903	0.007687009	ABL1/MAPK1	2
BP	GO:1903358	regulation of Golgi organization	2/153	15/18670	0.006532047	0.016654903	0.007687009	MAPK1/MAP2K1	2
BP	GO:1903729	regulation of plasma membrane organization	2/153	15/18670	0.006532047	0.016654903	0.007687009	AR/TGFB2	2
BP	GO:1905065	positive regulation of vascular smooth muscle cell differentiation	2/153	15/18670	0.006532047	0.016654903	0.007687009	KIT/SOD2	2
BP	GO:0070838	divalent metal ion transport	10/153	483/18670	0.006552656	0.016697137	0.007706502	ABL1/ANXA5/RHOA/F2/LGALS3/NOS3/PIK3CG/PRKACA/CCL5/VDR	10
BP	GO:0007266	Rho protein signal transduction	6/153	203/18670	0.00661425	0.016843693	0.007774144	ABL1/RHOA/CDC42/MET/RAC1/RAF1	6
BP	GO:0045639	positive regulation of myeloid cell differentiation	4/153	91/18670	0.006675942	0.016969388	0.007832159	CA2/MAPK14/HSPA1A/STAT1	4
BP	GO:0051899	membrane depolarization	4/153	91/18670	0.006675942	0.016969388	0.007832159	ABL1/PARP1/KDR/SRC	4
BP	GO:1901992	positive regulation of mitotic cell cycle phase transition	4/153	91/18670	0.006675942	0.016969388	0.007832159	AKT1/EGFR/MDM2/ADAM17	4
BP	GO:0010799	regulation of peptidyl-threonine phosphorylation	3/153	47/18670	0.006721652	0.017022687	0.007856758	BMP7/PLK1/MAPK1	3
BP	GO:0018198	peptidyl-cysteine modification	3/153	47/18670	0.006721652	0.017022687	0.007856758	ACE/NOS2/S100A9	3
BP	GO:0021695	cerebellar cortex development	3/153	47/18670	0.006721652	0.017022687	0.007856758	MAP2K1/PTPN11/RORA	3
BP	GO:0043370	regulation of CD4-positive, alpha-beta T cell differentiation	3/153	47/18670	0.006721652	0.017022687	0.007856758	IL2/JAK3/RARA	3
BP	GO:1901068	guanosine-containing compound metabolic process	3/153	47/18670	0.006721652	0.017022687	0.007856758	RHOA/IMPDH1/GMPR2	3
BP	GO:2000107	negative regulation of leukocyte apoptotic process	3/153	47/18670	0.006721652	0.017022687	0.007856758	IL2/JAK3/CCL5	3
BP	GO:0045833	negative regulation of lipid metabolic process	4/153	92/18670	0.006935762	0.017554154	0.008102055	AKT1/BMP2/PIK3CG/AKR1C3	4
BP	GO:1901617	organic hydroxy compound biosynthetic process	7/153	271/18670	0.007074788	0.017895053	0.008259396	BMP2/CYP19A1/DHFR/FGF1/TGFB2/VDR/AKR1C3	7
BP	GO:0051250	negative regulation of lymphocyte activation	5/153	146/18670	0.007085553	0.017911306	0.008266897	BTK/CASP3/IL2/JAK3/LGALS3	5
BP	GO:0072511	divalent inorganic cation transport	10/153	489/18670	0.007121632	0.017917997	0.008269985	ABL1/ANXA5/RHOA/F2/LGALS3/NOS3/PIK3CG/PRKACA/CCL5/VDR	10
BP	GO:0002762	negative regulation of myeloid leukocyte differentiation	3/153	48/18670	0.007127265	0.017917997	0.008269985	CDK6/PIK3R1/RARA	3
BP	GO:0007595	lactation	3/153	48/18670	0.007127265	0.017917997	0.008269985	ERBB4/UMPS/VDR	3
BP	GO:0042059	negative regulation of epidermal growth factor receptor signaling pathway	3/153	48/18670	0.007127265	0.017917997	0.008269985	CDC42/EGFR/GRB2	3
BP	GO:0051150	regulation of smooth muscle cell differentiation	3/153	48/18670	0.007127265	0.017917997	0.008269985	FGFR2/KIT/SOD2	3
BP	GO:0055010	ventricular cardiac muscle tissue morphogenesis	3/153	48/18670	0.007127265	0.017917997	0.008269985	FGFR2/TGFB2/TGFBR1	3
BP	GO:0101023	vascular endothelial cell proliferation	3/153	48/18670	0.007127265	0.017917997	0.008269985	FGFR1/PPARG/ADAM17	3
BP	GO:1905562	regulation of vascular endothelial cell proliferation	3/153	48/18670	0.007127265	0.017917997	0.008269985	FGFR1/PPARG/ADAM17	3
BP	GO:2000059	negative regulation of ubiquitin-dependent protein catabolic process	3/153	48/18670	0.007127265	0.017917997	0.008269985	CSNK2A1/FHIT/HSP90AB1	3
BP	GO:0048704	embryonic skeletal system morphogenesis	4/153	93/18670	0.007202186	0.018095329	0.008351832	BMP7/FGFR2/TGFBR1/TGFBR2	4
BP	GO:0071456	cellular response to hypoxia	6/153	207/18670	0.007252133	0.018209736	0.008404636	AKT1/BMP7/HMOX1/MDM2/RORA/SRC	6
BP	GO:0061351	neural precursor cell proliferation	5/153	147/18670	0.007287711	0.018287946	0.008440734	RHOA/CTNNA1/FGFR1/FGFR2/RORA	5
BP	GO:0002070	epithelial cell maturation	2/153	16/18670	0.007425277	0.018376224	0.008481478	PGR/TYMS	2
BP	GO:0003222	ventricular trabecula myocardium morphogenesis	2/153	16/18670	0.007425277	0.018376224	0.008481478	TGFB2/TGFBR1	2
BP	GO:0009130	pyrimidine nucleoside monophosphate biosynthetic process	2/153	16/18670	0.007425277	0.018376224	0.008481478	TYMS/UMPS	2
BP	GO:0010566	regulation of ketone biosynthetic process	2/153	16/18670	0.007425277	0.018376224	0.008481478	BMP2/AKR1C3	2
BP	GO:0010820	positive regulation of T cell chemotaxis	2/153	16/18670	0.007425277	0.018376224	0.008481478	CCL5/ADAM17	2
BP	GO:0016540	protein autoprocessing	2/153	16/18670	0.007425277	0.018376224	0.008481478	PARP1/CASP1	2
BP	GO:0030889	negative regulation of B cell proliferation	2/153	16/18670	0.007425277	0.018376224	0.008481478	BTK/CASP3	2
BP	GO:0031269	pseudopodium assembly	2/153	16/18670	0.007425277	0.018376224	0.008481478	CDC42/KIT	2
BP	GO:0031958	corticosteroid receptor signaling pathway	2/153	16/18670	0.007425277	0.018376224	0.008481478	NR3C1/JAK2	2
BP	GO:0033631	cell-cell adhesion mediated by integrin	2/153	16/18670	0.007425277	0.018376224	0.008481478	DPP4/CCL5	2
BP	GO:0034116	positive regulation of heterotypic cell-cell adhesion	2/153	16/18670	0.007425277	0.018376224	0.008481478	BMP7/FGG	2
BP	GO:0042447	hormone catabolic process	2/153	16/18670	0.007425277	0.018376224	0.008481478	CYP19A1/ACE	2
BP	GO:0043174	nucleoside salvage	2/153	16/18670	0.007425277	0.018376224	0.008481478	TYMP/MTAP	2
BP	GO:0043217	myelin maintenance	2/153	16/18670	0.007425277	0.018376224	0.008481478	AKT1/AKT2	2
BP	GO:0045623	negative regulation of T-helper cell differentiation	2/153	16/18670	0.007425277	0.018376224	0.008481478	IL2/JAK3	2
BP	GO:0051238	sequestering of metal ion	2/153	16/18670	0.007425277	0.018376224	0.008481478	LCN2/S100A9	2
BP	GO:0055012	ventricular cardiac muscle cell differentiation	2/153	16/18670	0.007425277	0.018376224	0.008481478	RARA/RARB	2
BP	GO:0060965	negative regulation of gene silencing by miRNA	2/153	16/18670	0.007425277	0.018376224	0.008481478	ESR1/PPARG	2
BP	GO:0061684	chaperone-mediated autophagy	2/153	16/18670	0.007425277	0.018376224	0.008481478	HSPA8/HSP90AA1	2
BP	GO:0071380	cellular response to prostaglandin E stimulus	2/153	16/18670	0.007425277	0.018376224	0.008481478	AKT1/PPARG	2
BP	GO:0071732	cellular response to nitric oxide	2/153	16/18670	0.007425277	0.018376224	0.008481478	CDK2/MMP3	2
BP	GO:1902001	fatty acid transmembrane transport	2/153	16/18670	0.007425277	0.018376224	0.008481478	AKT1/AKT2	2
BP	GO:2001170	negative regulation of ATP biosynthetic process	2/153	16/18670	0.007425277	0.018376224	0.008481478	PARP1/PPARA	2
BP	GO:0051289	protein homotetramerization	4/153	94/18670	0.007475284	0.018477827	0.008528373	ALDOA/CAT/REG1A/SOD2	4
BP	GO:0060993	kidney morphogenesis	4/153	94/18670	0.007475284	0.018477827	0.008528373	BMP2/BMP7/FGF1/STAT1	4
BP	GO:0051592	response to calcium ion	5/153	148/18670	0.007493864	0.018512668	0.008544454	ANXA5/BRAF/EGFR/FGG/AKR1C3	5
BP	GO:0002534	cytokine production involved in inflammatory response	3/153	49/18670	0.007547105	0.018577488	0.008574371	MAPK14/F2/NOS2	3
BP	GO:0002686	negative regulation of leukocyte migration	3/153	49/18670	0.007547105	0.018577488	0.008574371	AKT1/CYP19A1/HMOX1	3
BP	GO:0003254	regulation of membrane depolarization	3/153	49/18670	0.007547105	0.018577488	0.008574371	PARP1/KDR/SRC	3
BP	GO:0010712	regulation of collagen metabolic process	3/153	49/18670	0.007547105	0.018577488	0.008574371	F2/FAP/PPARG	3
BP	GO:0030857	negative regulation of epithelial cell differentiation	3/153	49/18670	0.007547105	0.018577488	0.008574371	GSK3B/MMP9/STAT1	3
BP	GO:0071825	protein-lipid complex subunit organization	3/153	49/18670	0.007547105	0.018577488	0.008574371	ALB/PLA2G2A/PRKACA	3
BP	GO:0009267	cellular response to starvation	5/153	149/18670	0.007704049	0.01892995	0.008737049	ALB/HSPA8/MAPK1/MAPK8/AKR1C3	5
BP	GO:0048592	eye morphogenesis	5/153	149/18670	0.007704049	0.01892995	0.008737049	BMP7/EPHA2/RARB/RARG/RBP4	5
BP	GO:0051092	positive regulation of NF-kappaB transcription factor activity	5/153	149/18670	0.007704049	0.01892995	0.008737049	AR/BTK/CAT/HSPA1A/S100A9	5
BP	GO:0043161	proteasome-mediated ubiquitin-dependent protein catabolic process	9/153	419/18670	0.007751862	0.019019542	0.008778399	AKT1/CDK2/FHIT/GSK3B/HSPA1A/HSP90AB1/MDM2/PLK1/AURKA	9
BP	GO:0042100	B cell proliferation	4/153	95/18670	0.007755121	0.019019542	0.008778399	ABL1/BTK/CASP3/IL2	4
BP	GO:0050810	regulation of steroid biosynthetic process	4/153	95/18670	0.007755121	0.019019542	0.008778399	BMP2/FGF1/VDR/AKR1C3	4
BP	GO:0050707	regulation of cytokine secretion	6/153	210/18670	0.007758941	0.019019542	0.008778399	ABL1/CASP1/MAPK14/MMP12/SRC/SYK	6
BP	GO:2000725	regulation of cardiac muscle cell differentiation	3/153	50/18670	0.007981284	0.019552961	0.009024597	BMP2/IGF1/PPARA	3
BP	GO:2001169	regulation of ATP biosynthetic process	4/153	96/18670	0.008041766	0.019689448	0.009087592	PARP1/IGF1/INSR/PPARA	4
BP	GO:2000146	negative regulation of cell motility	8/153	349/18670	0.008188427	0.02003665	0.009247842	AKT1/RHOA/CTNNA1/CYP19A1/ERBB4/GSTP1/HMOX1/PPARG	8
BP	GO:1902749	regulation of cell cycle G2/M phase transition	6/153	213/18670	0.008290831	0.020253678	0.00934801	CDK2/CHEK1/HSP90AA1/PLK1/PRKACA/AURKA	6
BP	GO:0120162	positive regulation of cold-induced thermogenesis	4/153	97/18670	0.008335284	0.020253678	0.00934801	IGF1R/JAK2/LCN2/SYK	4
BP	GO:0001678	cellular glucose homeostasis	5/153	152/18670	0.008359195	0.020253678	0.00934801	IGF1R/PIK3R1/PRKACA/RAC1/RAF1	5
BP	GO:0030902	hindbrain development	5/153	152/18670	0.008359195	0.020253678	0.00934801	ABL1/BMP7/MAP2K1/PTPN11/RORA	5
BP	GO:0003184	pulmonary valve morphogenesis	2/153	17/18670	0.008370343	0.020253678	0.00934801	NOS3/TGFB2	2
BP	GO:0009129	pyrimidine nucleoside monophosphate metabolic process	2/153	17/18670	0.008370343	0.020253678	0.00934801	TYMS/UMPS	2
BP	GO:0010715	regulation of extracellular matrix disassembly	2/153	17/18670	0.008370343	0.020253678	0.00934801	DPP4/FAP	2
BP	GO:0010819	regulation of T cell chemotaxis	2/153	17/18670	0.008370343	0.020253678	0.00934801	CCL5/ADAM17	2
BP	GO:0031268	pseudopodium organization	2/153	17/18670	0.008370343	0.020253678	0.00934801	CDC42/KIT	2
BP	GO:0032460	negative regulation of protein oligomerization	2/153	17/18670	0.008370343	0.020253678	0.00934801	ALB/SRC	2
BP	GO:0033145	positive regulation of intracellular steroid hormone receptor signaling pathway	2/153	17/18670	0.008370343	0.020253678	0.00934801	PARP1/AR	2
BP	GO:0035313	wound healing, spreading of epidermal cells	2/153	17/18670	0.008370343	0.020253678	0.00934801	MMP12/ADAM17	2
BP	GO:0035855	megakaryocyte development	2/153	17/18670	0.008370343	0.020253678	0.00934801	KIT/PTPN11	2
BP	GO:0051709	regulation of killing of cells of other organism	2/153	17/18670	0.008370343	0.020253678	0.00934801	NOS2/SYK	2
BP	GO:0060263	regulation of respiratory burst	2/153	17/18670	0.008370343	0.020253678	0.00934801	INSR/RAC1	2
BP	GO:0060850	regulation of transcription involved in cell fate commitment	2/153	17/18670	0.008370343	0.020253678	0.00934801	PPARG/RORA	2
BP	GO:1905331	negative regulation of morphogenesis of an epithelium	2/153	17/18670	0.008370343	0.020253678	0.00934801	BMP7/STAT1	2
BP	GO:2000811	negative regulation of anoikis	2/153	17/18670	0.008370343	0.020253678	0.00934801	PTK2/SRC	2
BP	GO:2001267	regulation of cysteine-type endopeptidase activity involved in apoptotic signaling pathway	2/153	17/18670	0.008370343	0.020253678	0.00934801	JAK2/MMP9	2
BP	GO:0007566	embryo implantation	3/153	51/18670	0.00842991	0.020362006	0.009398009	MMP2/MMP9/TGFBR2	3
BP	GO:0031050	dsRNA processing	3/153	51/18670	0.00842991	0.020362006	0.009398009	EGFR/ESR1/MAP2K1	3
BP	GO:0070918	production of small RNA involved in gene silencing by RNA	3/153	51/18670	0.00842991	0.020362006	0.009398009	EGFR/ESR1/MAP2K1	3
BP	GO:2001020	regulation of response to DNA damage stimulus	6/153	214/18670	0.008473817	0.020456092	0.009441434	ABL1/PARP1/BCL2L1/CHEK1/EGFR/MDM2	6
BP	GO:0050848	regulation of calcium-mediated signaling	4/153	98/18670	0.008635739	0.020834793	0.009616222	GSK3B/IGF1/PRKACA/SYK	4
BP	GO:0009620	response to fungus	3/153	52/18670	0.008893086	0.021405631	0.00987969	BTK/S100A9/SYK	3
BP	GO:0032330	regulation of chondrocyte differentiation	3/153	52/18670	0.008893086	0.021405631	0.00987969	RARB/RARG/TGFBR1	3
BP	GO:0032653	regulation of interleukin-10 production	3/153	52/18670	0.008893086	0.021405631	0.00987969	HGF/JAK3/SYK	3
BP	GO:0045839	negative regulation of mitotic nuclear division	3/153	52/18670	0.008893086	0.021405631	0.00987969	BMP7/CHEK1/PLK1	3
BP	GO:0072527	pyrimidine-containing compound metabolic process	4/153	99/18670	0.008943196	0.021513702	0.00992957	TYMP/MAPK1/TYMS/UMPS	4
BP	GO:0036294	cellular response to decreased oxygen levels	6/153	217/18670	0.009040184	0.02173435	0.010031409	AKT1/BMP7/HMOX1/MDM2/RORA/SRC	6
BP	GO:0060968	regulation of gene silencing	5/153	155/18670	0.009052028	0.021737504	0.010032865	CDK2/EGFR/ESR1/PPARG/MAP2K1	5
BP	GO:1903707	negative regulation of hemopoiesis	5/153	155/18670	0.009052028	0.021737504	0.010032865	CDK6/IL2/JAK3/PIK3R1/RARA	5
BP	GO:0015980	energy derivation by oxidation of organic compounds	7/153	285/18670	0.009198715	0.022076916	0.010189519	AKT1/AKT2/CAT/GSK3B/IGF1/INSR/NOS2	7
BP	GO:0030856	regulation of epithelial cell differentiation	5/153	156/18670	0.009291523	0.022257253	0.010272753	CTSL/GSK3B/MMP9/STAT1/VDR	5
BP	GO:0051480	regulation of cytosolic calcium ion concentration	8/153	357/18670	0.009314785	0.022257253	0.010272753	ABL1/ESR1/F2/IL2/JAK2/PIK3CG/PRKACA/TGM2	8
BP	GO:0002902	regulation of B cell apoptotic process	2/153	18/18670	0.009366347	0.022257253	0.010272753	BTK/IL2	2
BP	GO:0030809	negative regulation of nucleotide biosynthetic process	2/153	18/18670	0.009366347	0.022257253	0.010272753	PARP1/PPARA	2
BP	GO:0035089	establishment of apical/basal cell polarity	2/153	18/18670	0.009366347	0.022257253	0.010272753	RHOA/CDC42	2
BP	GO:0035994	response to muscle stretch	2/153	18/18670	0.009366347	0.022257253	0.010272753	MAPK14/RAF1	2
BP	GO:0051023	regulation of immunoglobulin secretion	2/153	18/18670	0.009366347	0.022257253	0.010272753	IL2/RBP4	2
BP	GO:0070233	negative regulation of T cell apoptotic process	2/153	18/18670	0.009366347	0.022257253	0.010272753	JAK3/CCL5	2
BP	GO:0071605	monocyte chemotactic protein-1 production	2/153	18/18670	0.009366347	0.022257253	0.010272753	GSTP1/SYK	2
BP	GO:0071637	regulation of monocyte chemotactic protein-1 production	2/153	18/18670	0.009366347	0.022257253	0.010272753	GSTP1/SYK	2
BP	GO:0090330	regulation of platelet aggregation	2/153	18/18670	0.009366347	0.022257253	0.010272753	FGG/SYK	2
BP	GO:1900372	negative regulation of purine nucleotide biosynthetic process	2/153	18/18670	0.009366347	0.022257253	0.010272753	PARP1/PPARA	2
BP	GO:0060828	regulation of canonical Wnt signaling pathway	7/153	286/18670	0.009366506	0.022257253	0.010272753	XIAP/BMP2/MAPK14/EGFR/FGFR2/GSK3B/SRC	7
BP	GO:0031638	zymogen activation	3/153	53/18670	0.009370907	0.022257253	0.010272753	FGG/HPN/PLAU	3
BP	GO:0038066	p38MAPK cascade	3/153	53/18670	0.009370907	0.022257253	0.010272753	BMP2/MAPK14/HGF	3
BP	GO:0045840	positive regulation of mitotic nuclear division	3/153	53/18670	0.009370907	0.022257253	0.010272753	IGF1/INSR/AURKA	3
BP	GO:0060563	neuroepithelial cell differentiation	3/153	53/18670	0.009370907	0.022257253	0.010272753	ABL1/BMP2/FGFR1	3
BP	GO:1901185	negative regulation of ERBB signaling pathway	3/153	53/18670	0.009370907	0.022257253	0.010272753	CDC42/EGFR/GRB2	3
BP	GO:0009913	epidermal cell differentiation	8/153	358/18670	0.009463325	0.022463834	0.0103681	CASP3/CTSL/EPHA2/FGFR1/MAP2K1/ST14/VDR/AKR1C3	8
BP	GO:0032611	interleukin-1 beta production	4/153	101/18670	0.009579364	0.022700123	0.010477158	CASP1/GSTP1/IGF1/JAK2	4
BP	GO:0032649	regulation of interferon-gamma production	4/153	101/18670	0.009579364	0.022700123	0.010477158	ABL1/HRAS/IL2/RARA	4
BP	GO:0097006	regulation of plasma lipoprotein particle levels	4/153	101/18670	0.009579364	0.022700123	0.010477158	ALB/HMOX1/PLA2G2A/PRKACA	4
BP	GO:0002526	acute inflammatory response	6/153	220/18670	0.009633175	0.022814542	0.010529967	BTK/F2/GSTP1/SERPINA1/PIK3CG/PPARG	6
BP	GO:0032655	regulation of interleukin-12 production	3/153	54/18670	0.009863467	0.023306462	0.010757012	MAPK14/JAK3/SYK	3
BP	GO:0045747	positive regulation of Notch signaling pathway	3/153	54/18670	0.009863467	0.023306462	0.010757012	KIT/NOS3/TGFB2	3
BP	GO:0046164	alcohol catabolic process	3/153	54/18670	0.009863467	0.023306462	0.010757012	ALDH2/SULT1A1/AKR1C3	3
BP	GO:0097345	mitochondrial outer membrane permeabilization	3/153	54/18670	0.009863467	0.023306462	0.010757012	GSK3B/HSPA1A/MAPK8	3
BP	GO:0021549	cerebellum development	4/153	102/18670	0.009908197	0.023398763	0.010799612	ABL1/MAP2K1/PTPN11/RORA	4
BP	GO:0002673	regulation of acute inflammatory response	5/153	159/18670	0.010036181	0.023673917	0.010926609	BTK/F2/GSTP1/PIK3CG/PPARG	5
BP	GO:0098727	maintenance of cell number	5/153	159/18670	0.010036181	0.023673917	0.010926609	BMP7/EIF4E/IGF1/KIT/RAF1	5
BP	GO:0032652	regulation of interleukin-1 production	4/153	103/18670	0.010244276	0.024150983	0.011146797	CASP1/GSTP1/IGF1/JAK2	4
BP	GO:0045444	fat cell differentiation	6/153	223/18670	0.010253441	0.024158793	0.011150402	AKT1/AKT2/BMP2/MAPK14/PPARG/RORA	6
BP	GO:0006754	ATP biosynthetic process	5/153	160/18670	0.010293246	0.024201799	0.011170251	PARP1/ALDOA/IGF1/INSR/PPARA	5
BP	GO:0019932	second-messenger-mediated signaling	9/153	439/18670	0.010327251	0.024201799	0.011170251	BTK/EGFR/GSK3B/IGF1/KDR/NOS2/NOS3/PRKACA/SYK	9
BP	GO:0002886	regulation of myeloid leukocyte mediated immunity	3/153	55/18670	0.010370849	0.024201799	0.011170251	BTK/HMOX1/SYK	3
BP	GO:0003229	ventricular cardiac muscle tissue development	3/153	55/18670	0.010370849	0.024201799	0.011170251	FGFR2/TGFB2/TGFBR1	3
BP	GO:0032613	interleukin-10 production	3/153	55/18670	0.010370849	0.024201799	0.011170251	HGF/JAK3/SYK	3
BP	GO:0042306	regulation of protein import into nucleus	3/153	55/18670	0.010370849	0.024201799	0.011170251	MAPK14/PIK3R1/MAPK1	3
BP	GO:0001991	regulation of systemic arterial blood pressure by circulatory renin-angiotensin	2/153	19/18670	0.010412402	0.024201799	0.011170251	ACE/MME	2
BP	GO:0002544	chronic inflammatory response	2/153	19/18670	0.010412402	0.024201799	0.011170251	CYP19A1/CCL5	2
BP	GO:0003159	morphogenesis of an endothelium	2/153	19/18670	0.010412402	0.024201799	0.011170251	RHOA/FGF1	2
BP	GO:0030859	polarized epithelial cell differentiation	2/153	19/18670	0.010412402	0.024201799	0.011170251	RHOA/CDC42	2
BP	GO:0046641	positive regulation of alpha-beta T cell proliferation	2/153	19/18670	0.010412402	0.024201799	0.011170251	SYK/TGFBR2	2
BP	GO:0046653	tetrahydrofolate metabolic process	2/153	19/18670	0.010412402	0.024201799	0.011170251	DHFR/TYMS	2
BP	GO:0060149	negative regulation of posttranscriptional gene silencing	2/153	19/18670	0.010412402	0.024201799	0.011170251	ESR1/PPARG	2
BP	GO:0060716	labyrinthine layer blood vessel development	2/153	19/18670	0.010412402	0.024201799	0.011170251	AKT1/MAPK1	2
BP	GO:0060967	negative regulation of gene silencing by RNA	2/153	19/18670	0.010412402	0.024201799	0.011170251	ESR1/PPARG	2
BP	GO:0061154	endothelial tube morphogenesis	2/153	19/18670	0.010412402	0.024201799	0.011170251	RHOA/FGF1	2
BP	GO:0071731	response to nitric oxide	2/153	19/18670	0.010412402	0.024201799	0.011170251	CDK2/MMP3	2
BP	GO:0071800	podosome assembly	2/153	19/18670	0.010412402	0.024201799	0.011170251	RHOA/SRC	2
BP	GO:0072074	kidney mesenchyme development	2/153	19/18670	0.010412402	0.024201799	0.011170251	BMP7/STAT1	2
BP	GO:1902170	cellular response to reactive nitrogen species	2/153	19/18670	0.010412402	0.024201799	0.011170251	CDK2/MMP3	2
BP	GO:1902176	negative regulation of oxidative stress-induced intrinsic apoptotic signaling pathway	2/153	19/18670	0.010412402	0.024201799	0.011170251	AKT1/SOD2	2
BP	GO:1902644	tertiary alcohol metabolic process	2/153	19/18670	0.010412402	0.024201799	0.011170251	BMP2/AKR1C3	2
BP	GO:1905939	regulation of gonad development	2/153	19/18670	0.010412402	0.024201799	0.011170251	INSR/SRC	2
BP	GO:2000696	regulation of epithelial cell differentiation involved in kidney development	2/153	19/18670	0.010412402	0.024201799	0.011170251	MMP9/STAT1	2
BP	GO:0009260	ribonucleotide biosynthetic process	7/153	293/18670	0.010604547	0.024634535	0.011369979	PARP1/ALDOA/IGF1/IMPDH1/INSR/PPARA/UMPS	7
BP	GO:0045665	negative regulation of neuron differentiation	6/153	225/18670	0.010682423	0.024801485	0.011447034	RHOA/BMP7/EIF4E/GSK3B/MDM2/PTK2	6
BP	GO:0000723	telomere maintenance	5/153	162/18670	0.010820863	0.025108782	0.011588865	PARP1/HSP90AA1/HSP90AB1/MAPK1/SRC	5
BP	GO:0006977	DNA damage response, signal transduction by p53 class mediator resulting in cell cycle arrest	3/153	56/18670	0.010893135	0.025191518	0.011627052	CDK2/MDM2/AURKA	3
BP	GO:0032615	interleukin-12 production	3/153	56/18670	0.010893135	0.025191518	0.011627052	MAPK14/JAK3/SYK	3
BP	GO:0072528	pyrimidine-containing compound biosynthetic process	3/153	56/18670	0.010893135	0.025191518	0.011627052	TYMP/TYMS/UMPS	3
BP	GO:0090183	regulation of kidney development	3/153	56/18670	0.010893135	0.025191518	0.011627052	BMP7/MMP9/STAT1	3
BP	GO:0090307	mitotic spindle assembly	3/153	56/18670	0.010893135	0.025191518	0.011627052	RHOA/HSPA1A/PLK1	3
BP	GO:0098586	cellular response to virus	3/153	56/18670	0.010893135	0.025191518	0.011627052	BCL2L1/MAPK14/MMP12	3
BP	GO:0006641	triglyceride metabolic process	4/153	105/18670	0.010938405	0.025267899	0.011662306	CAT/PIK3CG/PTPN11/NR1H2	4
BP	GO:0007009	plasma membrane organization	4/153	105/18670	0.010938405	0.025267899	0.011662306	AKT1/AKT2/AR/TGFB2	4
BP	GO:0050890	cognition	7/153	296/18670	0.011170075	0.025788629	0.011902647	CASP3/EGFR/INSR/KIT/MME/NQO2/MAPK1	7
BP	GO:0003300	cardiac muscle hypertrophy	4/153	106/18670	0.011296569	0.026036983	0.012017273	PARP1/IGF1/PPARA/PTK2	4
BP	GO:0007052	mitotic spindle organization	4/153	106/18670	0.011296569	0.026036983	0.012017273	RHOA/HSPA1A/PLK1/AURKA	4
BP	GO:1901989	positive regulation of cell cycle phase transition	4/153	106/18670	0.011296569	0.026036983	0.012017273	AKT1/EGFR/MDM2/ADAM17	4
BP	GO:0032535	regulation of cellular component size	8/153	370/18670	0.011386846	0.026230413	0.01210655	ABL1/AKT1/RHOA/GRB2/GSK3B/HSP90AB1/RAC1/RARG	8
BP	GO:0072431	signal transduction involved in mitotic G1 DNA damage checkpoint	3/153	57/18670	0.0114304	0.026274062	0.012126696	CDK2/MDM2/AURKA	3
BP	GO:1902400	intracellular signal transduction involved in G1 DNA damage checkpoint	3/153	57/18670	0.0114304	0.026274062	0.012126696	CDK2/MDM2/AURKA	3
BP	GO:0003323	type B pancreatic cell development	2/153	20/18670	0.011507632	0.026274062	0.012126696	CDK6/GSK3B	2
BP	GO:0006525	arginine metabolic process	2/153	20/18670	0.011507632	0.026274062	0.012126696	NOS2/NOS3	2
BP	GO:0010592	positive regulation of lamellipodium assembly	2/153	20/18670	0.011507632	0.026274062	0.012126696	CDC42/RAC1	2
BP	GO:0030220	platelet formation	2/153	20/18670	0.011507632	0.026274062	0.012126696	CASP3/PTPN11	2
BP	GO:0033194	response to hydroperoxide	2/153	20/18670	0.011507632	0.026274062	0.012126696	DAPK1/JAK2	2
BP	GO:0034393	positive regulation of smooth muscle cell apoptotic process	2/153	20/18670	0.011507632	0.026274062	0.012126696	PPARG/SOD2	2
BP	GO:0042535	positive regulation of tumor necrosis factor biosynthetic process	2/153	20/18670	0.011507632	0.026274062	0.012126696	JAK2/SYK	2
BP	GO:0043371	negative regulation of CD4-positive, alpha-beta T cell differentiation	2/153	20/18670	0.011507632	0.026274062	0.012126696	IL2/JAK3	2
BP	GO:0043586	tongue development	2/153	20/18670	0.011507632	0.026274062	0.012126696	EGFR/KIT	2
BP	GO:0060039	pericardium development	2/153	20/18670	0.011507632	0.026274062	0.012126696	BMP2/BMP7	2
BP	GO:0061162	establishment of monopolar cell polarity	2/153	20/18670	0.011507632	0.026274062	0.012126696	RHOA/CDC42	2
BP	GO:0097062	dendritic spine maintenance	2/153	20/18670	0.011507632	0.026274062	0.012126696	IGF1R/INSR	2
BP	GO:1901673	regulation of mitotic spindle assembly	2/153	20/18670	0.011507632	0.026274062	0.012126696	HSPA1A/PLK1	2
BP	GO:1905523	positive regulation of macrophage migration	2/153	20/18670	0.011507632	0.026274062	0.012126696	MAPK14/CCL5	2
BP	GO:0034249	negative regulation of cellular amide metabolic process	6/153	229/18670	0.011578364	0.026420944	0.012194489	DAPK1/DHFR/EIF4E/IGF1/RARA/TYMS	6
BP	GO:0048285	organelle fission	9/153	449/18670	0.011834737	0.026991046	0.012457618	RHOA/BMP7/CHEK1/HSPA1A/IGF1/INSR/KDR/PLK1/AURKA	9
BP	GO:0046390	ribose phosphate biosynthetic process	7/153	300/18670	0.011957806	0.027256667	0.012580214	PARP1/ALDOA/IGF1/IMPDH1/INSR/PPARA/UMPS	7
BP	GO:0032722	positive regulation of chemokine production	3/153	58/18670	0.011982715	0.02729837	0.012599462	HMOX1/SYK/ADAM17	3
BP	GO:0051225	spindle assembly	4/153	108/18670	0.012035371	0.027388098	0.012640876	RHOA/HSPA1A/PLK1/AURKA	4
BP	GO:0060071	Wnt signaling pathway, planar cell polarity pathway	4/153	108/18670	0.012035371	0.027388098	0.012640876	ABL1/RHOA/CDC42/RAC1	4
BP	GO:0014897	striated muscle hypertrophy	4/153	109/18670	0.012416116	0.028238969	0.013033592	PARP1/IGF1/PPARA/PTK2	4
BP	GO:0032890	regulation of organic acid transport	3/153	59/18670	0.012550145	0.028428978	0.01312129	AKT1/AKT2/SYK	3
BP	GO:0045824	negative regulation of innate immune response	3/153	59/18670	0.012550145	0.028428978	0.01312129	MMP12/PPARG/NR1H2	3
BP	GO:0070527	platelet aggregation	3/153	59/18670	0.012550145	0.028428978	0.01312129	FGG/PIK3CG/SYK	3
BP	GO:0072413	signal transduction involved in mitotic cell cycle checkpoint	3/153	59/18670	0.012550145	0.028428978	0.01312129	CDK2/MDM2/AURKA	3
BP	GO:1902402	signal transduction involved in mitotic DNA damage checkpoint	3/153	59/18670	0.012550145	0.028428978	0.01312129	CDK2/MDM2/AURKA	3
BP	GO:1902403	signal transduction involved in mitotic DNA integrity checkpoint	3/153	59/18670	0.012550145	0.028428978	0.01312129	CDK2/MDM2/AURKA	3
BP	GO:0003177	pulmonary valve development	2/153	21/18670	0.012651171	0.028428978	0.01312129	NOS3/TGFB2	2
BP	GO:0003283	atrial septum development	2/153	21/18670	0.012651171	0.028428978	0.01312129	MDM2/TGFB2	2
BP	GO:0010310	regulation of hydrogen peroxide metabolic process	2/153	21/18670	0.012651171	0.028428978	0.01312129	MMP3/RAC1	2
BP	GO:0030728	ovulation	2/153	21/18670	0.012651171	0.028428978	0.01312129	NOS3/PGR	2
BP	GO:0032516	positive regulation of phosphoprotein phosphatase activity	2/153	21/18670	0.012651171	0.028428978	0.01312129	HSP90AB1/JAK2	2
BP	GO:0032682	negative regulation of chemokine production	2/153	21/18670	0.012651171	0.028428978	0.01312129	EPHA2/GSTP1	2
BP	GO:0032891	negative regulation of organic acid transport	2/153	21/18670	0.012651171	0.028428978	0.01312129	AKT1/AKT2	2
BP	GO:0036344	platelet morphogenesis	2/153	21/18670	0.012651171	0.028428978	0.01312129	CASP3/PTPN11	2
BP	GO:0048245	eosinophil chemotaxis	2/153	21/18670	0.012651171	0.028428978	0.01312129	LGALS3/CCL5	2
BP	GO:0055093	response to hyperoxia	2/153	21/18670	0.012651171	0.028428978	0.01312129	CAT/PPARG	2
BP	GO:0060044	negative regulation of cardiac muscle cell proliferation	2/153	21/18670	0.012651171	0.028428978	0.01312129	RBP4/TGFBR2	2
BP	GO:0061339	establishment or maintenance of monopolar cell polarity	2/153	21/18670	0.012651171	0.028428978	0.01312129	RHOA/CDC42	2
BP	GO:0071498	cellular response to fluid shear stress	2/153	21/18670	0.012651171	0.028428978	0.01312129	CA2/SRC	2
BP	GO:0140131	positive regulation of lymphocyte chemotaxis	2/153	21/18670	0.012651171	0.028428978	0.01312129	CCL5/ADAM17	2
BP	GO:2000738	positive regulation of stem cell differentiation	2/153	21/18670	0.012651171	0.028428978	0.01312129	BMP7/TGFB2	2
BP	GO:2000810	regulation of bicellular tight junction assembly	2/153	21/18670	0.012651171	0.028428978	0.01312129	EPHA2/PRKACA	2
BP	GO:0016101	diterpenoid metabolic process	4/153	110/18670	0.012804495	0.028742227	0.013265869	ADH1C/EGFR/RBP4/AKR1C3	4
BP	GO:0090175	regulation of establishment of planar polarity	4/153	110/18670	0.012804495	0.028742227	0.013265869	ABL1/RHOA/CDC42/RAC1	4
BP	GO:0030216	keratinocyte differentiation	7/153	305/18670	0.012998097	0.029160948	0.013459128	CASP3/CTSL/EPHA2/MAP2K1/ST14/VDR/AKR1C3	7
BP	GO:0051784	negative regulation of nuclear division	3/153	60/18670	0.013132751	0.029415082	0.013576422	BMP7/CHEK1/PLK1	3
BP	GO:0120193	tight junction organization	3/153	60/18670	0.013132751	0.029415082	0.013576422	EPHA2/PRKACA/TGFBR1	3
BP	GO:1902110	positive regulation of mitochondrial membrane permeability involved in apoptotic process	3/153	60/18670	0.013132751	0.029415082	0.013576422	GSK3B/HSPA1A/MAPK8	3
BP	GO:0014896	muscle hypertrophy	4/153	111/18670	0.013200557	0.029534905	0.013631726	PARP1/IGF1/PPARA/PTK2	4
BP	GO:0022037	metencephalon development	4/153	111/18670	0.013200557	0.029534905	0.013631726	ABL1/MAP2K1/PTPN11/RORA	4
BP	GO:0000910	cytokinesis	5/153	171/18670	0.013424567	0.030019834	0.013855543	RHOA/BCL2L1/CDC42/PLK1/AURKA	5
BP	GO:0031109	microtubule polymerization or depolymerization	4/153	112/18670	0.013604353	0.030388945	0.014025905	ABL1/HSPA1A/MET/RAC1	4
BP	GO:0050868	negative regulation of T cell activation	4/153	112/18670	0.013604353	0.030388945	0.014025905	CASP3/IL2/JAK3/LGALS3	4
BP	GO:0007405	neuroblast proliferation	3/153	61/18670	0.013730589	0.030621216	0.014133109	CTNNA1/FGFR1/FGFR2	3
BP	GO:0030521	androgen receptor signaling pathway	3/153	61/18670	0.013730589	0.030621216	0.014133109	AR/RHOA/CDK7	3
BP	GO:0030888	regulation of B cell proliferation	3/153	61/18670	0.013730589	0.030621216	0.014133109	BTK/CASP3/IL2	3
BP	GO:0006631	fatty acid metabolic process	8/153	383/18670	0.013781828	0.030621895	0.014133423	AKT1/AKT2/MAPK14/GSTP1/PPARA/PPARG/NR1H2/AKR1C3	8
BP	GO:0006925	inflammatory cell apoptotic process	2/153	22/18670	0.013842165	0.030621895	0.014133423	CTSL/CCL5	2
BP	GO:0032069	regulation of nuclease activity	2/153	22/18670	0.013842165	0.030621895	0.014133423	AKT1/HSPA1A	2
BP	GO:0032727	positive regulation of interferon-alpha production	2/153	22/18670	0.013842165	0.030621895	0.014133423	MMP12/STAT1	2
BP	GO:0035584	calcium-mediated signaling using intracellular calcium source	2/153	22/18670	0.013842165	0.030621895	0.014133423	KDR/PRKACA	2
BP	GO:0042359	vitamin D metabolic process	2/153	22/18670	0.013842165	0.030621895	0.014133423	FGFR1/VDR	2
BP	GO:0046628	positive regulation of insulin receptor signaling pathway	2/153	22/18670	0.013842165	0.030621895	0.014133423	PTPN11/SRC	2
BP	GO:0048305	immunoglobulin secretion	2/153	22/18670	0.013842165	0.030621895	0.014133423	IL2/RBP4	2
BP	GO:0051000	positive regulation of nitric-oxide synthase activity	2/153	22/18670	0.013842165	0.030621895	0.014133423	AKT1/DHFR	2
BP	GO:0051195	negative regulation of cofactor metabolic process	2/153	22/18670	0.013842165	0.030621895	0.014133423	MMP3/PPARA	2
BP	GO:0060390	regulation of SMAD protein signal transduction	2/153	22/18670	0.013842165	0.030621895	0.014133423	PARP1/TGFBR1	2
BP	GO:0071404	cellular response to low-density lipoprotein particle stimulus	2/153	22/18670	0.013842165	0.030621895	0.014133423	PPARG/SYK	2
BP	GO:1901685	glutathione derivative metabolic process	2/153	22/18670	0.013842165	0.030621895	0.014133423	GSTM1/GSTP1	2
BP	GO:1901687	glutathione derivative biosynthetic process	2/153	22/18670	0.013842165	0.030621895	0.014133423	GSTM1/GSTP1	2
BP	GO:2000773	negative regulation of cellular senescence	2/153	22/18670	0.013842165	0.030621895	0.014133423	ABL1/CDK6	2
BP	GO:0051271	negative regulation of cellular component movement	8/153	384/18670	0.013980202	0.030910698	0.014266719	AKT1/RHOA/CTNNA1/CYP19A1/ERBB4/GSTP1/HMOX1/PPARG	8
BP	GO:0048640	negative regulation of developmental growth	4/153	113/18670	0.014015931	0.030956535	0.014287875	PPARA/PTK2/RBP4/TGFBR2	4
BP	GO:0060964	regulation of gene silencing by miRNA	4/153	113/18670	0.014015931	0.030956535	0.014287875	EGFR/ESR1/PPARG/MAP2K1	4
BP	GO:0010469	regulation of signaling receptor activity	5/153	173/18670	0.014055764	0.031027911	0.014320818	DAPK1/ESR2/PLAU/SRC/ADAM17	5
BP	GO:0009880	embryonic pattern specification	3/153	62/18670	0.014343711	0.03156228	0.014567454	BMP7/ERBB4/FGFR2	3
BP	GO:0010658	striated muscle cell apoptotic process	3/153	62/18670	0.014343711	0.03156228	0.014567454	APAF1/BMP7/JAK2	3
BP	GO:0031640	killing of cells of other organism	3/153	62/18670	0.014343711	0.03156228	0.014567454	F2/NOS2/SYK	3
BP	GO:0044364	disruption of cells of other organism	3/153	62/18670	0.014343711	0.03156228	0.014567454	F2/NOS2/SYK	3
BP	GO:1902686	mitochondrial outer membrane permeabilization involved in programmed cell death	3/153	62/18670	0.014343711	0.03156228	0.014567454	GSK3B/HSPA1A/MAPK8	3
BP	GO:1904356	regulation of telomere maintenance via telomere lengthening	3/153	62/18670	0.014343711	0.03156228	0.014567454	PARP1/MAPK1/SRC	3
BP	GO:0032200	telomere organization	5/153	175/18670	0.014706651	0.032343664	0.014928099	PARP1/HSP90AA1/HSP90AB1/MAPK1/SRC	5
BP	GO:0006096	glycolytic process	4/153	115/18670	0.014862625	0.032651897	0.015070363	ALDOA/IGF1/INSR/PPARA	4
BP	GO:0032612	interleukin-1 production	4/153	115/18670	0.014862625	0.032651897	0.015070363	CASP1/GSTP1/IGF1/JAK2	4
BP	GO:0031571	mitotic G1 DNA damage checkpoint	3/153	63/18670	0.014972162	0.032780036	0.015129505	CDK2/MDM2/AURKA	3
BP	GO:0034394	protein localization to cell surface	3/153	63/18670	0.014972162	0.032780036	0.015129505	AKT1/ERBB4/HSP90AB1	3
BP	GO:0044819	mitotic G1/S transition checkpoint	3/153	63/18670	0.014972162	0.032780036	0.015129505	CDK2/MDM2/AURKA	3
BP	GO:0006359	regulation of transcription by RNA polymerase III	2/153	23/18670	0.015079769	0.032780036	0.015129505	AR/PRDX5	2
BP	GO:0007530	sex determination	2/153	23/18670	0.015079769	0.032780036	0.015129505	AR/INSR	2
BP	GO:0032753	positive regulation of interleukin-4 production	2/153	23/18670	0.015079769	0.032780036	0.015129505	RARA/SYK	2
BP	GO:0034695	response to prostaglandin E	2/153	23/18670	0.015079769	0.032780036	0.015129505	AKT1/PPARG	2
BP	GO:0042451	purine nucleoside biosynthetic process	2/153	23/18670	0.015079769	0.032780036	0.015129505	IMPDH1/MTAP	2
BP	GO:0045821	positive regulation of glycolytic process	2/153	23/18670	0.015079769	0.032780036	0.015129505	IGF1/INSR	2
BP	GO:0046129	purine ribonucleoside biosynthetic process	2/153	23/18670	0.015079769	0.032780036	0.015129505	IMPDH1/MTAP	2
BP	GO:0050995	negative regulation of lipid catabolic process	2/153	23/18670	0.015079769	0.032780036	0.015129505	AKT1/PIK3CG	2
BP	GO:0051152	positive regulation of smooth muscle cell differentiation	2/153	23/18670	0.015079769	0.032780036	0.015129505	KIT/SOD2	2
BP	GO:0051349	positive regulation of lyase activity	2/153	23/18670	0.015079769	0.032780036	0.015129505	NOS2/NOS3	2
BP	GO:0071157	negative regulation of cell cycle arrest	2/153	23/18670	0.015079769	0.032780036	0.015129505	HSP90AB1/MDM2	2
BP	GO:1901032	negative regulation of response to reactive oxygen species	2/153	23/18670	0.015079769	0.032780036	0.015129505	HGF/MET	2
BP	GO:1901889	negative regulation of cell junction assembly	2/153	23/18670	0.015079769	0.032780036	0.015129505	ACE/SRC	2
BP	GO:1903206	negative regulation of hydrogen peroxide-induced cell death	2/153	23/18670	0.015079769	0.032780036	0.015129505	HGF/MET	2
BP	GO:2000637	positive regulation of gene silencing by miRNA	2/153	23/18670	0.015079769	0.032780036	0.015129505	EGFR/MAP2K1	2
BP	GO:2000726	negative regulation of cardiac muscle cell differentiation	2/153	23/18670	0.015079769	0.032780036	0.015129505	BMP2/PPARA	2
BP	GO:2001039	negative regulation of cellular response to drug	2/153	23/18670	0.015079769	0.032780036	0.015129505	HGF/MET	2
BP	GO:0006757	ATP generation from ADP	4/153	116/18670	0.015297832	0.033219069	0.015332138	ALDOA/IGF1/INSR/PPARA	4
BP	GO:2000736	regulation of stem cell differentiation	4/153	116/18670	0.015297832	0.033219069	0.015332138	ABL1/BMP7/CDK6/TGFB2	4
BP	GO:0035794	positive regulation of mitochondrial membrane permeability	3/153	64/18670	0.015615987	0.033856509	0.015626347	GSK3B/HSPA1A/MAPK8	3
BP	GO:0044783	G1 DNA damage checkpoint	3/153	64/18670	0.015615987	0.033856509	0.015626347	CDK2/MDM2/AURKA	3
BP	GO:0048247	lymphocyte chemotaxis	3/153	64/18670	0.015615987	0.033856509	0.015626347	PIK3CG/CCL5/ADAM17	3
BP	GO:0002761	regulation of myeloid leukocyte differentiation	4/153	117/18670	0.015741005	0.034002548	0.01569375	CA2/CDK6/PIK3R1/RARA	4
BP	GO:0010508	positive regulation of autophagy	4/153	117/18670	0.015741005	0.034002548	0.01569375	DAPK1/GSK3B/HMOX1/KDR	4
BP	GO:0010822	positive regulation of mitochondrion organization	4/153	117/18670	0.015741005	0.034002548	0.01569375	GSK3B/KDR/MMP9/MAPK8	4
BP	GO:0043666	regulation of phosphoprotein phosphatase activity	4/153	117/18670	0.015741005	0.034002548	0.01569375	GSK3B/HSP90AB1/JAK2/LGALS3	4
BP	GO:0051153	regulation of striated muscle cell differentiation	4/153	117/18670	0.015741005	0.034002548	0.01569375	BMP2/MAPK14/IGF1/PPARA	4
BP	GO:0060147	regulation of posttranscriptional gene silencing	4/153	117/18670	0.015741005	0.034002548	0.01569375	EGFR/ESR1/PPARG/MAP2K1	4
BP	GO:0060966	regulation of gene silencing by RNA	4/153	117/18670	0.015741005	0.034002548	0.01569375	EGFR/ESR1/PPARG/MAP2K1	4
BP	GO:0006611	protein export from nucleus	5/153	179/18670	0.016068492	0.034691806	0.016011875	EIF4E/GSK3B/MDM2/PRKACA/PTPN11	5
BP	GO:0042471	ear morphogenesis	4/153	118/18670	0.016192188	0.034940592	0.016126701	FGFR1/FGFR2/HPN/MAPK1	4
BP	GO:0000086	G2/M transition of mitotic cell cycle	6/153	247/18670	0.016272893	0.035016635	0.016161799	CDK2/CDK7/HSP90AA1/PLK1/PRKACA/AURKA	6
BP	GO:0032729	positive regulation of interferon-gamma production	3/153	65/18670	0.016275222	0.035016635	0.016161799	ABL1/HRAS/IL2	3
BP	GO:0001783	B cell apoptotic process	2/153	24/18670	0.016363152	0.035016635	0.016161799	BTK/IL2	2
BP	GO:0002407	dendritic cell chemotaxis	2/153	24/18670	0.016363152	0.035016635	0.016161799	PIK3CG/CCL5	2
BP	GO:0003418	growth plate cartilage chondrocyte differentiation	2/153	24/18670	0.016363152	0.035016635	0.016161799	RARG/TGFBR2	2
BP	GO:0003433	chondrocyte development involved in endochondral bone morphogenesis	2/153	24/18670	0.016363152	0.035016635	0.016161799	RARG/TGFBR2	2
BP	GO:0010288	response to lead ion	2/153	24/18670	0.016363152	0.035016635	0.016161799	ANXA5/CAT	2
BP	GO:0042104	positive regulation of activated T cell proliferation	2/153	24/18670	0.016363152	0.035016635	0.016161799	IGF1/IL2	2
BP	GO:0046639	negative regulation of alpha-beta T cell differentiation	2/153	24/18670	0.016363152	0.035016635	0.016161799	IL2/JAK3	2
BP	GO:0050996	positive regulation of lipid catabolic process	2/153	24/18670	0.016363152	0.035016635	0.016161799	AKT2/PPARA	2
BP	GO:0060148	positive regulation of posttranscriptional gene silencing	2/153	24/18670	0.016363152	0.035016635	0.016161799	EGFR/MAP2K1	2
BP	GO:0062009	secondary palate development	2/153	24/18670	0.016363152	0.035016635	0.016161799	TGFB2/TGFBR2	2
BP	GO:0071677	positive regulation of mononuclear cell migration	2/153	24/18670	0.016363152	0.035016635	0.016161799	LGALS3/CCL5	2
BP	GO:1900078	positive regulation of cellular response to insulin stimulus	2/153	24/18670	0.016363152	0.035016635	0.016161799	PTPN11/SRC	2
BP	GO:1905564	positive regulation of vascular endothelial cell proliferation	2/153	24/18670	0.016363152	0.035016635	0.016161799	FGFR1/ADAM17	2
BP	GO:2000209	regulation of anoikis	2/153	24/18670	0.016363152	0.035016635	0.016161799	PTK2/SRC	2
BP	GO:0040013	negative regulation of locomotion	8/153	396/18670	0.016526427	0.035347715	0.016314607	AKT1/RHOA/CTNNA1/CYP19A1/ERBB4/GSTP1/HMOX1/PPARG	8
BP	GO:0042866	pyruvate biosynthetic process	4/153	119/18670	0.016651423	0.035596621	0.016429489	ALDOA/IGF1/INSR/PPARA	4
BP	GO:0051785	positive regulation of nuclear division	3/153	66/18670	0.016949901	0.036178486	0.016698047	IGF1/INSR/AURKA	3
BP	GO:1902108	regulation of mitochondrial membrane permeability involved in apoptotic process	3/153	66/18670	0.016949901	0.036178486	0.016698047	GSK3B/HSPA1A/MAPK8	3
BP	GO:1905710	positive regulation of membrane permeability	3/153	66/18670	0.016949901	0.036178486	0.016698047	GSK3B/HSPA1A/MAPK8	3
BP	GO:0006721	terpenoid metabolic process	4/153	120/18670	0.017118751	0.036501138	0.016846965	ADH1C/EGFR/RBP4/AKR1C3	4
BP	GO:0072089	stem cell proliferation	4/153	120/18670	0.017118751	0.036501138	0.016846965	CTNNA1/ACE/FGFR1/FGFR2	4
BP	GO:0016311	dephosphorylation	9/153	478/18670	0.017140797	0.036529278	0.016859953	BMP2/GSK3B/HSP90AB1/JAK2/LGALS3/PTPN1/PTPN11/SRC/TGFB2	9
BP	GO:0050770	regulation of axonogenesis	5/153	183/18670	0.017512019	0.037301143	0.017216205	ABL1/RHOA/GSK3B/MAP2K1/PTK2	5
BP	GO:0048675	axon extension	4/153	121/18670	0.017594211	0.037413147	0.0172679	ABL1/GSK3B/HSP90AA1/HSP90AB1	4
BP	GO:0042108	positive regulation of cytokine biosynthetic process	3/153	67/18670	0.017640055	0.037413147	0.0172679	HMOX1/JAK2/SYK	3
BP	GO:0001945	lymph vessel development	2/153	25/18670	0.017691488	0.037413147	0.0172679	EPHA2/SYK	2
BP	GO:0003309	type B pancreatic cell differentiation	2/153	25/18670	0.017691488	0.037413147	0.0172679	CDK6/GSK3B	2
BP	GO:0030813	positive regulation of nucleotide catabolic process	2/153	25/18670	0.017691488	0.037413147	0.0172679	IGF1/INSR	2
BP	GO:0031069	hair follicle morphogenesis	2/153	25/18670	0.017691488	0.037413147	0.0172679	FGFR2/TGFB2	2
BP	GO:0032461	positive regulation of protein oligomerization	2/153	25/18670	0.017691488	0.037413147	0.0172679	MMP1/MMP3	2
BP	GO:0051197	positive regulation of coenzyme metabolic process	2/153	25/18670	0.017691488	0.037413147	0.0172679	IGF1/INSR	2
BP	GO:0061050	regulation of cell growth involved in cardiac muscle cell development	2/153	25/18670	0.017691488	0.037413147	0.0172679	IGF1/PPARA	2
BP	GO:0072012	glomerulus vasculature development	2/153	25/18670	0.017691488	0.037413147	0.0172679	BMP7/TEK	2
BP	GO:0072677	eosinophil migration	2/153	25/18670	0.017691488	0.037413147	0.0172679	LGALS3/CCL5	2
BP	GO:1900101	regulation of endoplasmic reticulum unfolded protein response	2/153	25/18670	0.017691488	0.037413147	0.0172679	PIK3R1/PTPN1	2
BP	GO:1904385	cellular response to angiotensin	2/153	25/18670	0.017691488	0.037413147	0.0172679	CA2/SRC	2
BP	GO:2000679	positive regulation of transcription regulatory region DNA binding	2/153	25/18670	0.017691488	0.037413147	0.0172679	PARP1/IGF1	2
BP	GO:0019915	lipid storage	3/153	68/18670	0.018345708	0.038717321	0.017869837	PPARA/PPARG/NR1H2	3
BP	GO:0035924	cellular response to vascular endothelial growth factor stimulus	3/153	68/18670	0.018345708	0.038717321	0.017869837	AKT1/MAPK14/KDR	3
BP	GO:0045806	negative regulation of endocytosis	3/153	68/18670	0.018345708	0.038717321	0.017869837	LGALS3/RAC1/NR1H2	3
BP	GO:0071230	cellular response to amino acid stimulus	3/153	68/18670	0.018345708	0.038717321	0.017869837	BCL2L1/EGFR/MMP2	3
BP	GO:0051928	positive regulation of calcium ion transport	4/153	123/18670	0.018569685	0.039169984	0.018078761	ABL1/F2/LGALS3/CCL5	4
BP	GO:0030308	negative regulation of cell growth	5/153	186/18670	0.01864938	0.039317998	0.018147077	ESR2/HSPA1A/PPARA/PPARG/TGFB2	5
BP	GO:0006309	apoptotic DNA fragmentation	2/153	26/18670	0.019063966	0.039878429	0.018405742	APAF1/CASP3	2
BP	GO:0022011	myelination in peripheral nervous system	2/153	26/18670	0.019063966	0.039878429	0.018405742	AKT1/AKT2	2
BP	GO:0030194	positive regulation of blood coagulation	2/153	26/18670	0.019063966	0.039878429	0.018405742	F2/PLG	2
BP	GO:0031954	positive regulation of protein autophosphorylation	2/153	26/18670	0.019063966	0.039878429	0.018405742	ACE/SRC	2
BP	GO:0032292	peripheral nervous system axon ensheathment	2/153	26/18670	0.019063966	0.039878429	0.018405742	AKT1/AKT2	2
BP	GO:0034114	regulation of heterotypic cell-cell adhesion	2/153	26/18670	0.019063966	0.039878429	0.018405742	BMP7/FGG	2
BP	GO:0045992	negative regulation of embryonic development	2/153	26/18670	0.019063966	0.039878429	0.018405742	BMP7/PRKACA	2
BP	GO:0048169	regulation of long-term neuronal synaptic plasticity	2/153	26/18670	0.019063966	0.039878429	0.018405742	HRAS/KIT	2
BP	GO:0060706	cell differentiation involved in embryonic placenta development	2/153	26/18670	0.019063966	0.039878429	0.018405742	AKT1/ST14	2
BP	GO:0072539	T-helper 17 cell differentiation	2/153	26/18670	0.019063966	0.039878429	0.018405742	IL2/RORA	2
BP	GO:1900048	positive regulation of hemostasis	2/153	26/18670	0.019063966	0.039878429	0.018405742	F2/PLG	2
BP	GO:1903959	regulation of anion transmembrane transport	2/153	26/18670	0.019063966	0.039878429	0.018405742	AKT1/AKT2	2
BP	GO:0001736	establishment of planar polarity	4/153	124/18670	0.019069772	0.039878429	0.018405742	ABL1/RHOA/CDC42/RAC1	4
BP	GO:0007098	centrosome cycle	4/153	124/18670	0.019069772	0.039878429	0.018405742	CDK2/CHEK1/PLK1/AURKA	4
BP	GO:0007164	establishment of tissue polarity	4/153	124/18670	0.019069772	0.039878429	0.018405742	ABL1/RHOA/CDC42/RAC1	4
BP	GO:0046717	acid secretion	4/153	124/18670	0.019069772	0.039878429	0.018405742	ACE/NOS2/PLA2G2A/SYK	4
BP	GO:0000280	nuclear division	8/153	407/18670	0.019141107	0.040007337	0.018465239	RHOA/BMP7/CHEK1/HSPA1A/IGF1/INSR/PLK1/AURKA	8
BP	GO:0050808	synapse organization	8/153	408/18670	0.019392668	0.040512618	0.018698449	ABL1/RHOA/CDC42/MAPK14/ERBB4/IGF1R/INSR/PTK2	8
BP	GO:2000134	negative regulation of G1/S transition of mitotic cell cycle	4/153	125/18670	0.019578141	0.040879396	0.018867734	CDK2/CDK6/MDM2/AURKA	4
BP	GO:0032720	negative regulation of tumor necrosis factor production	3/153	70/18670	0.019803593	0.041308354	0.019065718	GSTP1/IGF1/RARA	3
BP	GO:0061515	myeloid cell development	3/153	70/18670	0.019803593	0.041308354	0.019065718	KIT/PTPN11/SRC	3
BP	GO:0016042	lipid catabolic process	7/153	333/18670	0.020056338	0.041814425	0.019299294	AKT1/AKT2/CYP19A1/PIK3CG/PLA2G2A/PPARA/AKR1C3	7
BP	GO:0032479	regulation of type I interferon production	4/153	126/18670	0.020094826	0.041831286	0.019307076	MMP12/PTPN11/STAT1/SYK	4
BP	GO:0046031	ADP metabolic process	4/153	126/18670	0.020094826	0.041831286	0.019307076	ALDOA/IGF1/INSR/PPARA	4
BP	GO:0051283	negative regulation of sequestering of calcium ion	4/153	126/18670	0.020094826	0.041831286	0.019307076	ABL1/ANXA5/F2/PRKACA	4
BP	GO:0030336	negative regulation of cell migration	7/153	334/18670	0.02034961	0.04233377	0.019538995	AKT1/RHOA/CYP19A1/ERBB4/GSTP1/HMOX1/PPARG	7
BP	GO:0032673	regulation of interleukin-4 production	2/153	27/18670	0.020479782	0.04233377	0.019538995	RARA/SYK	2
BP	GO:0035883	enteroendocrine cell differentiation	2/153	27/18670	0.020479782	0.04233377	0.019538995	CDK6/GSK3B	2
BP	GO:0036336	dendritic cell migration	2/153	27/18670	0.020479782	0.04233377	0.019538995	PIK3CG/CCL5	2
BP	GO:0043921	modulation by host of viral transcription	2/153	27/18670	0.020479782	0.04233377	0.019538995	HPN/CCL5	2
BP	GO:0050820	positive regulation of coagulation	2/153	27/18670	0.020479782	0.04233377	0.019538995	F2/PLG	2
BP	GO:0051450	myoblast proliferation	2/153	27/18670	0.020479782	0.04233377	0.019538995	HGF/IGF1	2
BP	GO:0052472	modulation by host of symbiont transcription	2/153	27/18670	0.020479782	0.04233377	0.019538995	HPN/CCL5	2
BP	GO:0061437	renal system vasculature development	2/153	27/18670	0.020479782	0.04233377	0.019538995	BMP7/TEK	2
BP	GO:0061440	kidney vasculature development	2/153	27/18670	0.020479782	0.04233377	0.019538995	BMP7/TEK	2
BP	GO:0072378	blood coagulation, fibrin clot formation	2/153	27/18670	0.020479782	0.04233377	0.019538995	F2/FGG	2
BP	GO:0090169	regulation of spindle assembly	2/153	27/18670	0.020479782	0.04233377	0.019538995	HSPA1A/PLK1	2
BP	GO:1901623	regulation of lymphocyte chemotaxis	2/153	27/18670	0.020479782	0.04233377	0.019538995	CCL5/ADAM17	2
BP	GO:1904357	negative regulation of telomere maintenance via telomere lengthening	2/153	27/18670	0.020479782	0.04233377	0.019538995	PARP1/SRC	2
BP	GO:0015850	organic hydroxy compound transport	6/153	262/18670	0.021079218	0.043551057	0.02010083	CYP19A1/PPARG/PTPN11/RBP4/SYK/NR1H2	6
BP	GO:0032606	type I interferon production	4/153	128/18670	0.021153276	0.043638542	0.020141208	MMP12/PTPN11/STAT1/SYK	4
[truncated: 82 more rows]
