# Supplementary material for: Identification of the Mechanism of Action of the Index Components of Banxia Xiexin Decoction for Gastric Cancer through Network Pharmacology, Bioinformatics, and Molecular Docking Analysis
Source: Hindawi journal article supplement (doi:10.1155/2024/4309908), 2024-01-13
Supplement: f1 [file 4309908.f1.zip › Supplementary file S3 Enriched GO CC terms.txt]

ONTOLOGY	ID	Description	GeneRatio	BgRatio	pvalue	p.adjust	qvalue	geneID	Count
CC	GO:0101002	ficolin-1-rich granule	19/154	185/19717	3.67616E-16	1.15064E-13	8.97758E-14	ALDOA/APAF1/RHOA/CAT/MAPK14/CTSB/CTSD/GSTP1/HSPA1A/HSPA8/HSP90AA1/HSP90AB1/IMPDH1/LGALS3/MMP9/SERPINA1/PPIA/MAPK1/RAC1	19
CC	GO:1904813	ficolin-1-rich granule lumen	16/154	124/19717	2.28901E-15	3.5823E-13	2.795E-13	ALDOA/APAF1/CAT/MAPK14/CTSB/CTSD/GSTP1/HSPA1A/HSPA8/HSP90AA1/HSP90AB1/IMPDH1/MMP9/SERPINA1/PPIA/MAPK1	16
CC	GO:0031983	vesicle lumen	22/154	339/19717	2.40297E-14	2.5071E-12	1.9561E-12	ALB/ALDOA/APAF1/CAT/MAPK14/CTSD/EGFR/FGG/GSTP1/HGF/HSPA8/HSP90AA1/HSP90AB1/IGF1/IMPDH1/LCN2/SERPINA1/PLG/PPIA/MAPK1/S100A9/TGFB2	22
CC	GO:0034774	secretory granule lumen	21/154	321/19717	8.34696E-14	6.53149E-12	5.09604E-12	ALB/ALDOA/APAF1/CAT/MAPK14/CTSD/FGG/GSTP1/HGF/HSPA8/HSP90AA1/HSP90AB1/IGF1/IMPDH1/LCN2/SERPINA1/PLG/PPIA/MAPK1/S100A9/TGFB2	21
CC	GO:0060205	cytoplasmic vesicle lumen	21/154	338/19717	2.28476E-13	1.43026E-11	1.11592E-11	ALB/ALDOA/APAF1/CAT/MAPK14/CTSD/FGG/GSTP1/HGF/HSPA8/HSP90AA1/HSP90AB1/IGF1/IMPDH1/LCN2/SERPINA1/PLG/PPIA/MAPK1/S100A9/TGFB2	21
CC	GO:0005925	focal adhesion	22/154	405/19717	8.78848E-13	4.55269E-11	3.55212E-11	ANXA5/RHOA/CAT/CDC42/CTNNA1/DPP4/EGFR/EPHA2/FAP/HSPA1A/HSPA8/JAK2/MME/PLAU/PPIA/MAPK1/MAP2K1/PTK2/RAC1/ADAM17/TEK/TGM2	22
CC	GO:0005924	cell-substrate adherens junction	22/154	408/19717	1.01817E-12	4.55269E-11	3.55212E-11	ANXA5/RHOA/CAT/CDC42/CTNNA1/DPP4/EGFR/EPHA2/FAP/HSPA1A/HSPA8/JAK2/MME/PLAU/PPIA/MAPK1/MAP2K1/PTK2/RAC1/ADAM17/TEK/TGM2	22
CC	GO:0030055	cell-substrate junction	22/154	412/19717	1.23647E-12	4.83771E-11	3.7745E-11	ANXA5/RHOA/CAT/CDC42/CTNNA1/DPP4/EGFR/EPHA2/FAP/HSPA1A/HSPA8/JAK2/MME/PLAU/PPIA/MAPK1/MAP2K1/PTK2/RAC1/ADAM17/TEK/TGM2	22
CC	GO:0045121	membrane raft	19/154	315/19717	5.76273E-12	1.90652E-10	1.48751E-10	BTK/CASP3/CTNNA1/CTSD/DPP4/EGFR/HMOX1/INSR/JAK2/KDR/MME/NOS3/PRKACA/MAPK1/SRC/ADAM17/TEK/TGFBR1/TGFBR2	19
CC	GO:0098857	membrane microdomain	19/154	316/19717	6.09111E-12	1.90652E-10	1.48751E-10	BTK/CASP3/CTNNA1/CTSD/DPP4/EGFR/HMOX1/INSR/JAK2/KDR/MME/NOS3/PRKACA/MAPK1/SRC/ADAM17/TEK/TGFBR1/TGFBR2	19
CC	GO:0098589	membrane region	19/154	328/19717	1.16636E-11	3.31882E-10	2.58943E-10	BTK/CASP3/CTNNA1/CTSD/DPP4/EGFR/HMOX1/INSR/JAK2/KDR/MME/NOS3/PRKACA/MAPK1/SRC/ADAM17/TEK/TGFBR1/TGFBR2	19
CC	GO:0031093	platelet alpha granule lumen	8/154	67/19717	5.09445E-08	1.3288E-06	1.03677E-06	ALB/ALDOA/FGG/HGF/IGF1/SERPINA1/PLG/TGFB2	8
CC	GO:0062023	collagen-containing extracellular matrix	16/154	406/19717	1.24649E-07	3.00116E-06	2.34158E-06	ANXA5/BMP7/CTSB/CTSD/CTSL/F2/FGFR2/FGG/LGALS3/MMP2/MMP9/SERPINA1/PLG/S100A9/TGFB2/TGM2	16
CC	GO:0044853	plasma membrane raft	9/154	109/19717	1.87515E-07	4.1923E-06	3.27094E-06	CTNNA1/HMOX1/INSR/JAK2/NOS3/PRKACA/MAPK1/SRC/TGFBR2	9
CC	GO:0005901	caveola	8/154	80/19717	2.07828E-07	4.33667E-06	3.38358E-06	CTNNA1/HMOX1/INSR/JAK2/NOS3/MAPK1/SRC/TGFBR2	8
CC	GO:0031091	platelet alpha granule	8/154	91/19717	5.66741E-07	1.10869E-05	8.65025E-06	ALB/ALDOA/FGG/HGF/IGF1/SERPINA1/PLG/TGFB2	8
CC	GO:0031256	leading edge membrane	10/154	170/19717	9.18538E-07	1.69119E-05	1.31951E-05	AKT2/RHOA/DPP4/EPHA2/FAP/INSR/RAC1/REG1A/SRC/ADAM17	10
CC	GO:0045178	basal part of cell	6/154	51/19717	2.77442E-06	4.82441E-05	3.76413E-05	EGFR/ERBB4/FAP/MET/REG1A/TEK	6
CC	GO:0031252	cell leading edge	14/154	403/19717	3.48773E-06	5.74558E-05	4.48285E-05	ABL1/AKT2/RHOA/CDK6/CTNNA1/DPP4/EPHA2/FAP/INSR/PTK2/RAC1/REG1A/SRC/ADAM17	14
CC	GO:0090575	RNA polymerase II transcription factor complex	9/154	163/19717	5.49911E-06	8.60611E-05	6.71471E-05	CDK7/PPARA/PPARG/RARA/RARB/RARG/RXRB/NR1H2/VDR	9
CC	GO:0032587	ruffle membrane	7/154	94/19717	8.96539E-06	0.000133627	0.000104259	AKT2/RHOA/EPHA2/FAP/RAC1/SRC/ADAM17	7
CC	GO:0044798	nuclear transcription factor complex	9/154	201/19717	2.94439E-05	0.000417563	0.000325793	CDK7/PPARA/PPARG/RARA/RARB/RARG/RXRB/NR1H2/VDR	9
CC	GO:0005667	transcription factor complex	12/154	365/19717	3.06835E-05	0.000417563	0.000325793	PARP1/CDK2/CDK7/HSP90AB1/PPARA/PPARG/RARA/RARB/RARG/RXRB/NR1H2/VDR	12
CC	GO:0001726	ruffle	8/154	172/19717	6.30749E-05	0.000822601	0.000641814	AKT2/RHOA/CDK6/EPHA2/FAP/RAC1/SRC/ADAM17	8
CC	GO:0005911	cell-cell junction	13/154	459/19717	6.63162E-05	0.000830279	0.000647804	AKT1/RHOA/CTNNA1/DPP4/EPHA2/GRB2/HPN/ITK/KIT/PIK3R1/ADAM17/TEK/TGFBR1	13
CC	GO:0031253	cell projection membrane	11/154	345/19717	8.70364E-05	0.001047784	0.000817508	AKT2/RHOA/DPP4/EPHA2/FAP/HSP90AB1/INSR/RAC1/REG1A/SRC/ADAM17	11
CC	GO:0009925	basal plasma membrane	4/154	34/19717	0.00013829	0.001603144	0.001250813	EGFR/ERBB4/MET/TEK	4
CC	GO:0043025	neuronal cell body	13/154	497/19717	0.000146621	0.001639008	0.001278795	ABL1/CASP3/CDC42/NQO1/HPN/HSP90AA1/HSP90AB1/INSR/MME/MAPK1/REG1A/AURKA/TGFB2	13
CC	GO:0072562	blood microparticle	7/154	147/19717	0.000158019	0.001705518	0.001330689	ALB/ANXA5/F2/FGG/HSPA1A/HSPA8/PLG	7
CC	GO:0042470	melanosome	6/154	106/19717	0.000184711	0.001864983	0.001455107	CTSB/CTSD/HSPA8/HSP90AA1/HSP90AB1/RAC1	6
CC	GO:0048770	pigment granule	6/154	106/19717	0.000184711	0.001864983	0.001455107	CTSB/CTSD/HSPA8/HSP90AA1/HSP90AB1/RAC1	6
CC	GO:1902911	protein kinase complex	6/154	109/19717	0.0002151	0.00210395	0.001641555	CDK2/CDK6/CDK7/IGF1R/INSR/TGFBR1	6
CC	GO:0070820	tertiary granule	7/154	164/19717	0.000309156	0.002932296	0.002287852	ALDOA/RHOA/CTSD/LGALS3/MMP9/PLAU/RAC1	7
CC	GO:0005775	vacuolar lumen	7/154	172/19717	0.000412228	0.003794926	0.002960898	CTSB/CTSD/CTSL/HSPA8/HSP90AA1/IMPDH1/MAPK1	7
CC	GO:0031258	lamellipodium membrane	3/154	22/19717	0.000645253	0.005610118	0.004377156	DPP4/EPHA2/FAP	3
CC	GO:0042629	mast cell granule	3/154	22/19717	0.000645253	0.005610118	0.004377156	BTK/KIT/PIK3CG	3
CC	GO:0030027	lamellipodium	7/154	193/19717	0.00081714	0.006912565	0.005393359	RHOA/CTNNA1/DPP4/EPHA2/FAP/PTK2/RAC1	7
CC	GO:0043202	lysosomal lumen	5/154	95/19717	0.000896898	0.007387607	0.005763998	CTSB/CTSD/CTSL/HSPA8/HSP90AA1	5
CC	GO:0061695	transferase complex, transferring phosphorus-containing groups	8/154	259/19717	0.000998393	0.008012744	0.006251746	CDK2/CDK6/CDK7/IGF1R/INSR/PIK3CG/PIK3R1/TGFBR1	8
CC	GO:0016323	basolateral plasma membrane	7/154	217/19717	0.001609585	0.012595004	0.009826941	CA2/EGFR/ERBB4/HSP90AB1/MET/ST14/TEK	7
CC	GO:0098978	glutamatergic synapse	9/154	349/19717	0.001722596	0.013150546	0.010260389	RHOA/MAPK14/EIF4E/ERBB4/GSK3B/HRAS/JAK2/RAC1/SRC	9
CC	GO:0031904	endosome lumen	3/154	34/19717	0.002341184	0.017041642	0.01329632	CTSB/CTSL/JAK2	3
CC	GO:0051233	spindle midzone	3/154	34/19717	0.002341184	0.017041642	0.01329632	CDC42/PLK1/AURKA	3
CC	GO:0008180	COP9 signalosome	3/154	36/19717	0.002761811	0.019646517	0.01532871	GRB2/HSPA1A/HSP90AB1	3
CC	GO:0061827	sperm head	2/154	11/19717	0.003182897	0.022138814	0.017273263	ALDOA/HSP90AB1	2
CC	GO:0045177	apical part of cell	9/154	384/19717	0.003267917	0.022236045	0.017349126	CA2/DPP4/EGFR/FAP/HPN/HSP90AB1/PTK2/ADAM17/TEK	9
CC	GO:0000307	cyclin-dependent protein kinase holoenzyme complex	3/154	42/19717	0.004291555	0.028579931	0.022298786	CDK2/CDK6/CDK7	3
CC	GO:0044292	dendrite terminus	2/154	13/19717	0.004467911	0.029134502	0.022731477	HSP90AA1/HSP90AB1	2
CC	GO:1902554	serine/threonine protein kinase complex	4/154	88/19717	0.005021511	0.032076182	0.025026649	CDK2/CDK6/CDK7/TGFBR1	4
CC	GO:0071437	invadopodium	2/154	16/19717	0.006769033	0.042374146	0.033061381	DPP4/FAP	2
CC	GO:0005782	peroxisomal matrix	3/154	51/19717	0.007397511	0.044240102	0.034517248	CAT/NOS2/PRDX5	3
CC	GO:0031907	microbody lumen	3/154	51/19717	0.007397511	0.044240102	0.034517248	CAT/NOS2/PRDX5	3
CC	GO:0031143	pseudopodium	2/154	17/19717	0.007632478	0.044240102	0.034517248	MAPK1/RAF1	2
CC	GO:0099524	postsynaptic cytosol	2/154	17/19717	0.007632478	0.044240102	0.034517248	EIF4E/HSPA8	2
CC	GO:0019898	extrinsic component of membrane	7/154	295/19717	0.008592541	0.048899367	0.038152525	RHOA/CTNNA1/PIK3CG/PIK3R1/PLG/SRC/ST14	7
