# Supplementary material for: Identification of the Mechanism of Action of the Index Components of Banxia Xiexin Decoction for Gastric Cancer through Network Pharmacology, Bioinformatics, and Molecular Docking Analysis
Source: Hindawi journal article supplement (doi:10.1155/2024/4309908), 2024-01-13
Supplement: f1 [file 4309908.f1.zip › Supplementary file S4 Enriched GO MF terms.txt]

ONTOLOGY	ID	Description	GeneRatio	BgRatio	pvalue	p.adjust	qvalue	geneID	Count
MF	GO:0004713	protein tyrosine kinase activity	22/154	134/17697	3.95403E-22	1.90189E-19	1.14043E-19	ABL1/BTK/EGFR/EPHA2/EPHB4/ERBB4/FGFR1/FGFR2/IGF1R/INSR/ITK/JAK2/JAK3/KDR/KIT/MET/MAP2K1/PTK2/SRC/SYK/TEK/TNK2	22
MF	GO:0004879	nuclear receptor activity	14/154	47/17697	2.08785E-18	3.34752E-16	2.00727E-16	AR/ESR1/ESR2/NR3C1/PGR/PPARA/PPARG/RARA/RARB/RARG/RORA/RXRB/NR1H2/VDR	14
MF	GO:0098531	transcription factor activity, direct ligand regulated sequence-specific DNA binding	14/154	47/17697	2.08785E-18	3.34752E-16	2.00727E-16	AR/ESR1/ESR2/NR3C1/PGR/PPARA/PPARG/RARA/RARB/RARG/RORA/RXRB/NR1H2/VDR	14
MF	GO:0003707	steroid hormone receptor activity	14/154	56/17697	3.31816E-17	3.99009E-15	2.39257E-15	AR/ESR1/ESR2/NR3C1/PGR/PPARA/PPARG/RARA/RARB/RARG/RORA/RXRB/NR1H2/VDR	14
MF	GO:0019199	transmembrane receptor protein kinase activity	14/154	79/17697	5.99591E-15	5.76806E-13	3.45869E-13	EGFR/EPHA2/EPHB4/ERBB4/FGFR1/FGFR2/IGF1R/INSR/KDR/KIT/MET/TEK/TGFBR1/TGFBR2	14
MF	GO:0004714	transmembrane receptor protein tyrosine kinase activity	12/154	62/17697	1.8157E-13	1.45559E-11	8.72812E-12	EGFR/EPHA2/EPHB4/ERBB4/FGFR1/FGFR2/IGF1R/INSR/KDR/KIT/MET/TEK	12
MF	GO:0004175	endopeptidase activity	24/154	427/17697	3.44382E-13	2.3664E-11	1.41896E-11	CASP1/CASP3/CASP7/CTSB/CTSD/CTSL/ACE/DPP4/F2/FAP/HGF/HPN/MME/MMP1/MMP2/MMP3/MMP7/MMP9/MMP12/MMP13/PLAU/PLG/ST14/ADAM17	24
MF	GO:0004674	protein serine/threonine kinase activity	24/154	439/17697	6.25625E-13	3.76157E-11	2.25554E-11	AKT1/AKT2/BRAF/CDK2/CDK6/CDK7/CHEK1/MAPK14/CSNK2A1/DAPK1/EGFR/GSK3B/PIK3CG/PLK1/PRKACA/MAPK1/MAPK8/MAP2K1/RAF1/AURKA/SYK/TGFBR1/TGFBR2/TNK2	24
MF	GO:0019902	phosphatase binding	16/154	185/17697	6.4323E-12	3.43771E-10	2.06135E-10	AKT1/MAPK14/EGFR/GRB2/JAK3/LGALS3/MET/PIK3R1/PPARA/PPARG/MAPK1/PTK2/PTPN1/REG1A/STAT1/SYK	16
MF	GO:0043560	insulin receptor substrate binding	6/154	11/17697	1.75509E-10	8.27772E-09	4.96355E-09	GRB2/IGF1R/INSR/JAK2/PIK3R1/PTPN11	6
MF	GO:0004715	non-membrane spanning protein tyrosine kinase activity	9/154	46/17697	1.89303E-10	8.27772E-09	4.96355E-09	ABL1/BTK/ITK/JAK2/JAK3/PTK2/SRC/SYK/TNK2	9
MF	GO:0019903	protein phosphatase binding	13/154	140/17697	2.73203E-10	1.09509E-08	6.56646E-09	AKT1/MAPK14/EGFR/GRB2/JAK3/LGALS3/MET/PIK3R1/PPARG/PTK2/PTPN1/REG1A/STAT1	13
MF	GO:0008236	serine-type peptidase activity	14/154	182/17697	6.73544E-10	2.49211E-08	1.49434E-08	ACE/DPP4/F2/FAP/HGF/HPN/MMP1/MMP2/MMP3/MMP7/MMP9/PLAU/PLG/ST14	14
MF	GO:0017171	serine hydrolase activity	14/154	186/17697	8.96475E-10	3.08003E-08	1.84687E-08	ACE/DPP4/F2/FAP/HGF/HPN/MMP1/MMP2/MMP3/MMP7/MMP9/PLAU/PLG/ST14	14
MF	GO:0042562	hormone binding	11/154	102/17697	1.36533E-09	4.32317E-08	2.59229E-08	ANXA5/AR/EGFR/NR3C1/HSD17B1/IGF1R/INSR/NQO2/PIK3R1/SHBG/VDR	11
MF	GO:0004252	serine-type endopeptidase activity	13/154	160/17697	1.43806E-09	4.32317E-08	2.59229E-08	DPP4/F2/FAP/HGF/HPN/MMP1/MMP2/MMP3/MMP7/MMP9/PLAU/PLG/ST14	13
MF	GO:0004222	metalloendopeptidase activity	10/154	103/17697	2.19076E-08	5.94847E-07	3.56687E-07	FAP/MME/MMP1/MMP2/MMP3/MMP7/MMP9/MMP12/MMP13/ADAM17	10
MF	GO:0042169	SH2 domain binding	7/154	36/17697	2.22604E-08	5.94847E-07	3.56687E-07	ABL1/FGFR1/JAK2/KIT/PTK2/SRC/SYK	7
MF	GO:0005158	insulin receptor binding	6/154	22/17697	2.61895E-08	6.63007E-07	3.97558E-07	IGF1/IGF1R/PIK3R1/PTPN1/PTPN11/SRC	6
MF	GO:0008237	metallopeptidase activity	12/154	181/17697	6.16392E-08	1.48242E-06	8.88902E-07	ACE/FAP/FOLH1/MME/MMP1/MMP2/MMP3/MMP7/MMP9/MMP12/MMP13/ADAM17	12
MF	GO:0050839	cell adhesion molecule binding	19/154	499/17697	7.11697E-08	1.63013E-06	9.77469E-07	ALDOA/CTNNA1/EGFR/EPHA2/FAP/FGF1/FGG/HSPA1A/HSPA8/HSP90AB1/ICAM2/IGF1/KDR/PTPN1/PTPN11/SRC/STAT1/SYK/ADAM17	19
MF	GO:0004712	protein serine/threonine/tyrosine kinase activity	7/154	43/17697	8.16604E-08	1.78539E-06	1.07057E-06	AKT1/MAPK14/PRKACA/MAPK1/MAP2K1/AURKA/TNK2	7
MF	GO:0005496	steroid binding	9/154	95/17697	1.40539E-07	2.9391E-06	1.76237E-06	AR/ESR1/ESR2/NR3C1/HSD17B1/PGR/RORA/SHBG/VDR	9
MF	GO:0005126	cytokine receptor binding	14/154	286/17697	2.10204E-07	4.21284E-06	2.52614E-06	BMP2/BMP7/CASP3/GRB2/IL2/JAK2/PIK3R1/CCL5/STAT1/SYK/ADAM17/TGFB2/TGFBR1/TGFBR2	14
MF	GO:0044389	ubiquitin-like protein ligase binding	14/154	308/17697	5.15523E-07	9.6433E-06	5.78239E-06	BAG1/EGFR/FHIT/GSK3B/HSPA1A/HSPA8/HSP90AA1/HSP90AB1/MDM2/PRKACA/SRC/STAT1/AURKA/TNK2	14
MF	GO:0033218	amide binding	15/154	356/17697	5.21259E-07	9.6433E-06	5.78239E-06	ANXA5/DHFR/FOLH1/GSTM1/GSTP1/HSP90AB1/IGF1R/INSR/MME/NQO2/PIK3R1/PPARG/PPIA/TGFB2/TYMS	15
MF	GO:0051427	hormone receptor binding	11/154	185/17697	6.64579E-07	1.18393E-05	7.0992E-06	PARP1/CDK7/ESR1/JAK2/PPARG/PTPN11/RARB/RARG/SRC/STAT1/VDR	11
MF	GO:0001784	phosphotyrosine residue binding	6/154	40/17697	1.18399E-06	2.03392E-05	1.21959E-05	ABL1/GRB2/PIK3R1/MAPK1/PTPN11/SYK	6
MF	GO:0031625	ubiquitin protein ligase binding	13/154	290/17697	1.56275E-06	2.59201E-05	1.55424E-05	BAG1/EGFR/FHIT/GSK3B/HSPA1A/HSPA8/HSP90AA1/HSP90AB1/MDM2/PRKACA/SRC/AURKA/TNK2	13
MF	GO:0008083	growth factor activity	10/154	163/17697	1.6385E-06	2.62706E-05	1.57526E-05	BMP2/BMP7/TYMP/F2/FGF1/HGF/IGF1/IL2/REG1A/TGFB2	10
MF	GO:0030374	nuclear receptor transcription coactivator activity	7/154	67/17697	1.85083E-06	2.87177E-05	1.72199E-05	PPARA/PPARG/RARA/RARB/RARG/NR1H2/VDR	7
MF	GO:0005178	integrin binding	9/154	132/17697	2.3092E-06	3.47101E-05	2.08132E-05	EGFR/FAP/FGF1/ICAM2/IGF1/KDR/SRC/SYK/ADAM17	9
MF	GO:0019838	growth factor binding	9/154	137/17697	3.1425E-06	4.575E-05	2.7433E-05	EGFR/FGFR1/FGFR2/IGF1R/INSR/KDR/TEK/TGFBR1/TGFBR2	9
MF	GO:0046875	ephrin receptor binding	5/154	27/17697	3.23388E-06	4.575E-05	2.7433E-05	ABL1/GRB2/PIK3CG/PTPN1/SRC	5
MF	GO:0045309	protein phosphorylated amino acid binding	6/154	51/17697	5.13407E-06	7.05568E-05	4.23078E-05	ABL1/GRB2/PIK3R1/MAPK1/PTPN11/SYK	6
MF	GO:0035257	nuclear hormone receptor binding	9/154	152/17697	7.36324E-06	9.65851E-05	5.79152E-05	PARP1/CDK7/ESR1/PPARG/RARB/RARG/SRC/STAT1/VDR	9
MF	GO:0031406	carboxylic acid binding	10/154	193/17697	7.42963E-06	9.65851E-05	5.79152E-05	ALB/DHFR/NOS2/NOS3/PPARA/PPARG/RARA/S100A9/TYMS/VDR	10
MF	GO:0051219	phosphoprotein binding	7/154	83/17697	7.867E-06	9.95797E-05	5.97107E-05	ABL1/GRB2/PIK3R1/MAPK1/PTPN11/SRC/SYK	7
MF	GO:0031072	heat shock protein binding	8/154	119/17697	9.50084E-06	0.000117177	7.02626E-05	APAF1/CSNK2A1/FGF1/NR3C1/HSPA1A/HSPA8/HSP90AB1/KDR	8
MF	GO:0016209	antioxidant activity	7/154	86/17697	9.96183E-06	0.000119791	7.183E-05	ALB/CAT/NQO1/GSTP1/S100A9/SOD2/PRDX5	7
MF	GO:0042277	peptide binding	12/154	295/17697	1.07271E-05	0.000125847	7.54614E-05	ANXA5/FOLH1/GSTM1/GSTP1/HSP90AB1/IGF1R/INSR/MME/PIK3R1/PPARG/PPIA/TGFB2	12
MF	GO:0035173	histone kinase activity	4/154	17/17697	1.20169E-05	0.000134421	8.06027E-05	CDK2/CHEK1/JAK2/AURKA	4
MF	GO:0046965	retinoid X receptor binding	4/154	17/17697	1.20169E-05	0.000134421	8.06027E-05	PPARG/RARB/RARG/VDR	4
MF	GO:0043177	organic acid binding	10/154	205/17697	1.2603E-05	0.000137774	8.26129E-05	ALB/DHFR/NOS2/NOS3/PPARA/PPARG/RARA/S100A9/TYMS/VDR	10
MF	GO:0033293	monocarboxylic acid binding	6/154	64/17697	1.94745E-05	0.000208161	0.000124819	ALB/PPARA/PPARG/RARA/S100A9/VDR	6
MF	GO:0070851	growth factor receptor binding	8/154	134/17697	2.26178E-05	0.000236503	0.000141814	ERBB4/FGF1/GRB2/IL2/JAK2/SRC/ADAM17/TNK2	8
MF	GO:0043028	cysteine-type endopeptidase regulator activity involved in apoptotic process	5/154	42/17697	3.06747E-05	0.000313926	0.000188239	APAF1/XIAP/CASP1/PRDX5/BIRC7	5
MF	GO:0042826	histone deacetylase binding	7/154	111/17697	5.25321E-05	0.000526415	0.000315653	PARP1/HSPA1A/HSP90AA1/HSP90AB1/MAPK8/RAC1/RARA	7
MF	GO:0033612	receptor serine/threonine kinase binding	4/154	25/17697	6.04999E-05	0.000593887	0.000356111	BMP2/BMP7/MDM2/SRC	4
MF	GO:0042974	retinoic acid receptor binding	4/154	26/17697	7.10174E-05	0.000683188	0.000409658	PPARG/RARB/RARG/VDR	4
MF	GO:0005160	transforming growth factor beta receptor binding	5/154	51/17697	7.95366E-05	0.00075014	0.000449805	BMP2/BMP7/TGFB2/TGFBR1/TGFBR2	5
MF	GO:0050661	NADP binding	5/154	52/17697	8.7385E-05	0.000808311	0.000484686	CAT/DHFR/HSD17B1/NOS2/NOS3	5
MF	GO:0070700	BMP receptor binding	3/154	11/17697	0.000101306	0.000919401	0.000551298	BMP2/BMP7/SRC	3
MF	GO:0003713	transcription coactivator activity	11/154	319/17697	0.000112002	0.000997647	0.000598217	ABL1/CDK7/ESR2/PPARA/PPARG/RARA/RARB/RARG/RXRB/NR1H2/VDR	11
MF	GO:0043548	phosphatidylinositol 3-kinase binding	4/154	30/17697	0.000126707	0.001108106	0.000664451	IGF1R/INSR/JAK2/PIK3R1	4
MF	GO:0002020	protease binding	7/154	128/17697	0.000129284	0.001110455	0.00066586	CASP3/DPP4/FAP/GSK3B/KIT/LCN2/SERPINA1	7
MF	GO:0008239	dipeptidyl-peptidase activity	3/154	12/17697	0.000134213	0.001113042	0.000667411	ACE/DPP4/FAP	3
MF	GO:1900750	oligopeptide binding	3/154	12/17697	0.000134213	0.001113042	0.000667411	FOLH1/GSTM1/GSTP1	3
MF	GO:0045296	cadherin binding	11/154	331/17697	0.000154802	0.00126203	0.000756749	ALDOA/CTNNA1/EGFR/EPHA2/HSPA1A/HSPA8/HSP90AB1/KDR/PTPN1/SRC/STAT1	11
MF	GO:0097110	scaffold protein binding	5/154	59/17697	0.000160297	0.001285044	0.000770549	HSP90AA1/MDM2/NOS3/MAP2K1/SRC	5
MF	GO:0016653	oxidoreductase activity, acting on NAD(P)H, heme protein as acceptor	3/154	13/17697	0.000173364	0.001367017	0.000819702	NQO1/NOS2/NOS3	3
MF	GO:0020037	heme binding	7/154	135/17697	0.000179995	0.001384765	0.000830344	CAT/CYP19A1/HMOX1/JAK2/NOS2/NOS3/SRC	7
MF	GO:0005539	glycosaminoglycan binding	9/154	229/17697	0.000181373	0.001384765	0.000830344	ANXA5/BMP7/F2/FGF1/FGFR1/FGFR2/MMP7/REG1A/TGFBR2	9
MF	GO:0097718	disordered domain specific binding	4/154	33/17697	0.000185394	0.001393355	0.000835495	HSPA1A/HSP90AA1/HSP90AB1/MDM2	4
MF	GO:0005504	fatty acid binding	4/154	34/17697	0.000208699	0.001544371	0.000926048	ALB/PPARA/PPARG/S100A9	4
MF	GO:0004707	MAP kinase activity	3/154	14/17697	0.000219238	0.001597782	0.000958075	MAPK14/MAPK1/MAPK8	3
MF	GO:0000900	translation repressor activity, mRNA regulatory element binding	3/154	15/17697	0.000272301	0.001926131	0.001154962	DHFR/RARA/TYMS	3
MF	GO:0097153	cysteine-type endopeptidase activity involved in apoptotic process	3/154	15/17697	0.000272301	0.001926131	0.001154962	CASP1/CASP3/CASP7	3
MF	GO:0046906	tetrapyrrole binding	7/154	145/17697	0.000279219	0.001946439	0.001167139	CAT/CYP19A1/HMOX1/JAK2/NOS2/NOS3/SRC	7
MF	GO:0005518	collagen binding	5/154	67/17697	0.000292437	0.002009458	0.001204927	CTSB/CTSL/MMP9/MMP12/MMP13	5
MF	GO:0004708	MAP kinase kinase activity	3/154	16/17697	0.000333005	0.002194184	0.001315694	MAPK14/MAPK1/MAP2K1	3
MF	GO:0005159	insulin-like growth factor receptor binding	3/154	16/17697	0.000333005	0.002194184	0.001315694	IGF1/INSR/PIK3R1	3
MF	GO:0023026	MHC class II protein complex binding	3/154	16/17697	0.000333005	0.002194184	0.001315694	HSPA8/HSP90AA1/HSP90AB1	3
MF	GO:0016651	oxidoreductase activity, acting on NAD(P)H	6/154	107/17697	0.000345429	0.002225884	0.001334702	NQO1/NQO2/NOS2/NOS3/AKR1C3/GMPR2	6
MF	GO:1901681	sulfur compound binding	9/154	250/17697	0.000347071	0.002225884	0.001334702	ANXA5/BMP7/F2/FGF1/FGFR1/FGFR2/GSTM1/GSTP1/MMP7	9
MF	GO:0008238	exopeptidase activity	6/154	113/17697	0.000462744	0.002928682	0.00175612	ACE/DPP4/FAP/FOLH1/HPN/MME	6
MF	GO:0030331	estrogen receptor binding	4/154	42/17697	0.000477225	0.002981109	0.001787556	PARP1/ESR1/PPARG/SRC	4
MF	GO:0070696	transmembrane receptor protein serine/threonine kinase binding	3/154	19/17697	0.000565284	0.003485915	0.002090252	BMP2/BMP7/SRC	3
MF	GO:0004745	retinol dehydrogenase activity	3/154	20/17697	0.000660809	0.003997927	0.002397269	ADH1C/BMP2/AKR1C3	3
MF	GO:0051117	ATPase binding	5/154	80/17697	0.000664936	0.003997927	0.002397269	AR/ESR1/PGR/RAC1/NR1H2	5
MF	GO:0008201	heparin binding	7/154	169/17697	0.00070083	0.004161717	0.002495482	ANXA5/BMP7/F2/FGF1/FGFR1/FGFR2/MMP7	7
MF	GO:0016763	transferase activity, transferring pentosyl groups	4/154	47/17697	0.000735284	0.00431307	0.002586238	PARP1/TYMP/MTAP/UMPS	4
MF	GO:0008013	beta-catenin binding	5/154	82/17697	0.000744276	0.004313213	0.002586323	AR/CTNNA1/ESR1/GSK3B/RORA	5
MF	GO:0017046	peptide hormone binding	4/154	49/17697	0.000861748	0.004934533	0.002958884	ANXA5/IGF1R/INSR/PIK3R1	4
MF	GO:0001223	transcription coactivator binding	3/154	23/17697	0.001007124	0.005699138	0.003417363	ESR1/PPARA/RORA	3
MF	GO:0050662	coenzyme binding	9/154	291/17697	0.001029124	0.005755915	0.003451407	PARP1/ALB/ALDH2/CAT/DHFR/HSD17B1/NQO2/NOS2/NOS3	9
MF	GO:0048018	receptor ligand activity	12/154	482/17697	0.00105744	0.005846305	0.003505608	BMP2/BMP7/TYMP/F2/FGF1/HGF/IGF1/IL2/LGALS3/REG1A/CCL5/TGFB2	12
MF	GO:0072341	modified amino acid binding	5/154	89/17697	0.001078472	0.00589483	0.003534705	DHFR/GSTM1/GSTP1/MME/TYMS	5
MF	GO:0035258	steroid hormone receptor binding	5/154	92/17697	0.001251409	0.006751763	0.004048546	PARP1/CDK7/ESR1/PPARG/SRC	5
MF	GO:0008022	protein C-terminus binding	7/154	187/17697	0.001265829	0.006751763	0.004048546	ABL1/CDK7/HRAS/JAK2/PPARG/MAP2K1/SRC	7
MF	GO:0023023	MHC protein complex binding	3/154	25/17697	0.001291397	0.006751763	0.004048546	HSPA8/HSP90AA1/HSP90AB1	3
MF	GO:0043027	cysteine-type endopeptidase inhibitor activity involved in apoptotic process	3/154	25/17697	0.001291397	0.006751763	0.004048546	XIAP/PRDX5/BIRC7	3
MF	GO:1990782	protein tyrosine kinase binding	5/154	93/17697	0.001313366	0.006792787	0.004073145	ANXA5/HSP90AA1/PIK3R1/PTPN1/PTPN11	5
MF	GO:0030371	translation repressor activity	3/154	26/17697	0.001450577	0.007344503	0.004403969	DHFR/RARA/TYMS	3
MF	GO:0051019	mitogen-activated protein kinase binding	3/154	26/17697	0.001450577	0.007344503	0.004403969	ABL1/MAPK14/ACE	3
MF	GO:0090079	translation regulator activity, nucleic acid binding	3/154	28/17697	0.00180462	0.009041899	0.005421775	DHFR/RARA/TYMS	3
MF	GO:0004693	cyclin-dependent protein serine/threonine kinase activity	3/154	29/17697	0.002000089	0.009917966	0.00594709	CDK2/CDK6/CDK7	3
MF	GO:0030145	manganese ion binding	4/154	62/17697	0.002079126	0.010204689	0.006119017	ABL1/ABO/PRKACA/SOD2	4
MF	GO:0097472	cyclin-dependent protein kinase activity	3/154	30/17697	0.002208242	0.010728936	0.00643337	CDK2/CDK6/CDK7	3
MF	GO:0019207	kinase regulator activity	7/154	207/17697	0.002257987	0.010860916	0.006512509	CASP3/GSTP1/HSP90AB1/IL2/PIK3R1/MAP2K1/CCL5	7
MF	GO:0047485	protein N-terminus binding	5/154	109/17697	0.002642579	0.012561186	0.007532038	PARP1/CSNK2A1/HSPA1A/MDM2/MAP2K1	5
MF	GO:0051721	protein phosphatase 2A binding	3/154	32/17697	0.002663703	0.012561186	0.007532038	AKT1/PTPN1/STAT1	3
MF	GO:0005154	epidermal growth factor receptor binding	3/154	33/17697	0.002911533	0.013596578	0.008152888	ERBB4/GRB2/TNK2	3
MF	GO:0030971	receptor tyrosine kinase binding	4/154	69/17697	0.00307442	0.014219191	0.008526225	ANXA5/PIK3R1/PTPN1/PTPN11	4
MF	GO:0001664	G protein-coupled receptor binding	8/154	280/17697	0.003176061	0.014549384	0.008724218	ACE/HSPA1A/HSPA8/IL2/JAK2/PTPN11/CCL5/STAT1	8
MF	GO:0005165	neurotrophin receptor binding	2/154	10/17697	0.003234029	0.014675167	0.008799641	GRB2/PIK3R1	2
MF	GO:0070491	repressing transcription factor binding	4/154	71/17697	0.00340948	0.015326726	0.009190333	EIF4E/PPARA/PPARG/STAT1	4
MF	GO:0004197	cysteine-type endopeptidase activity	5/154	116/17697	0.003456529	0.015394357	0.009230887	CASP1/CASP3/CASP7/CTSB/CTSL	5
MF	GO:0016616	oxidoreductase activity, acting on the CH-OH group of donors, NAD or NADP as acceptor	5/154	119/17697	0.00385528	0.016845065	0.010100772	ADH1C/BMP2/HSD17B1/IMPDH1/AKR1C3	5
MF	GO:0031996	thioesterase binding	2/154	11/17697	0.003930189	0.016845065	0.010100772	CDC42/RAC1	2
MF	GO:0043295	glutathione binding	2/154	11/17697	0.003930189	0.016845065	0.010100772	GSTM1/GSTP1	2
MF	GO:0001618	virus receptor activity	4/154	74/17697	0.003957365	0.016845065	0.010100772	DPP4/EGFR/EPHA2/HSPA1A	4
MF	GO:0104005	hijacked molecular function	4/154	74/17697	0.003957365	0.016845065	0.010100772	DPP4/EGFR/EPHA2/HSPA1A	4
MF	GO:0042056	chemoattractant activity	3/154	38/17697	0.004361319	0.018401704	0.011034176	HGF/LGALS3/CCL5	3
MF	GO:0005542	folic acid binding	2/154	12/17697	0.004689384	0.018818887	0.011284331	DHFR/TYMS	2
MF	GO:0016004	phospholipase activator activity	2/154	12/17697	0.004689384	0.018818887	0.011284331	CASP3/CCL5	2
MF	GO:0031994	insulin-like growth factor I binding	2/154	12/17697	0.004689384	0.018818887	0.011284331	IGF1R/INSR	2
MF	GO:0035325	Toll-like receptor binding	2/154	12/17697	0.004689384	0.018818887	0.011284331	S100A9/SYK	2
MF	GO:1990825	sequence-specific mRNA binding	2/154	12/17697	0.004689384	0.018818887	0.011284331	DHFR/TYMS	2
MF	GO:0016709	oxidoreductase activity, acting on paired donors, with incorporation or reduction of molecular oxygen, NAD(P)H as one donor, and incorporation of one atom of oxygen	3/154	39/17697	0.004694941	0.018818887	0.011284331	NOS2/NOS3/AKR1C3	3
MF	GO:0001228	DNA-binding transcription activator activity, RNA polymerase II-specific	10/154	439/17697	0.005135385	0.020359324	0.01220802	PARP1/AR/ESR1/NR3C1/PGR/PPARA/RORA/RXRB/STAT1/NR1H2	10
MF	GO:0035591	signaling adaptor activity	4/154	80/17697	0.005225872	0.020359324	0.01220802	GRB2/PIK3R1/PTPN11/SRC	4
MF	GO:0046332	SMAD binding	4/154	80/17697	0.005225872	0.020359324	0.01220802	PARP1/BMP2/TGFBR1/TGFBR2	4
MF	GO:0016614	oxidoreductase activity, acting on CH-OH group of donors	5/154	128/17697	0.005248557	0.020359324	0.01220802	ADH1C/BMP2/HSD17B1/IMPDH1/AKR1C3	5
MF	GO:0051879	Hsp90 protein binding	3/154	41/17697	0.005407449	0.020807864	0.012476977	CSNK2A1/NR3C1/KDR	3
MF	GO:0031404	chloride ion binding	2/154	13/17697	0.005510479	0.020870396	0.012514473	ACE/NQO2	2
MF	GO:0031434	mitogen-activated protein kinase kinase binding	2/154	13/17697	0.005510479	0.020870396	0.012514473	ACE/RAF1	2
MF	GO:0051082	unfolded protein binding	5/154	131/17697	0.005783169	0.021732064	0.013031153	HSPA1A/HSPA8/HSP90AA1/HSP90AB1/PPIA	5
MF	GO:0001221	transcription cofactor binding	3/154	43/17697	0.006181501	0.023048854	0.013820738	ESR1/PPARA/RORA	3
MF	GO:0036041	long-chain fatty acid binding	2/154	14/17697	0.006392352	0.023471156	0.014073962	PPARG/S100A9	2
MF	GO:0060229	lipase activator activity	2/154	14/17697	0.006392352	0.023471156	0.014073962	CASP3/CCL5	2
MF	GO:0048156	tau protein binding	3/154	45/17697	0.007018415	0.025574678	0.015335292	GSK3B/HSP90AA1/HSP90AB1	3
MF	GO:0019842	vitamin binding	5/154	138/17697	0.007177974	0.025938274	0.015553314	ALB/DHFR/RBP4/TYMS/VDR	5
MF	GO:0004089	carbonate dehydratase activity	2/154	15/17697	0.007333899	0.025938274	0.015553314	CA1/CA2	2
MF	GO:0005024	transforming growth factor beta-activated receptor activity	2/154	15/17697	0.007333899	0.025938274	0.015553314	TGFBR1/TGFBR2	2
MF	GO:0016805	dipeptidase activity	2/154	15/17697	0.007333899	0.025938274	0.015553314	ACE/FOLH1	2
MF	GO:0008656	cysteine-type endopeptidase activator activity involved in apoptotic process	2/154	16/17697	0.008334026	0.029047635	0.017417775	APAF1/CASP1	2
MF	GO:0010181	FMN binding	2/154	16/17697	0.008334026	0.029047635	0.017417775	NOS2/NOS3	2
MF	GO:0004177	aminopeptidase activity	3/154	48/17697	0.008394223	0.029047635	0.017417775	ACE/DPP4/FAP	3
MF	GO:0004675	transmembrane receptor protein serine/threonine kinase activity	2/154	17/17697	0.009391658	0.031817954	0.019078935	TGFBR1/TGFBR2	2
MF	GO:0005005	transmembrane-ephrin receptor activity	2/154	17/17697	0.009391658	0.031817954	0.019078935	EPHA2/EPHB4	2
MF	GO:0051018	protein kinase A binding	3/154	50/17697	0.009393242	0.031817954	0.019078935	GSK3B/PRKACA/RARA	3
MF	GO:0004601	peroxidase activity	3/154	52/17697	0.010458779	0.034611346	0.020753931	CAT/GSTP1/PRDX5	3
MF	GO:0005070	SH3/SH2 adaptor activity	3/154	52/17697	0.010458779	0.034611346	0.020753931	GRB2/PTPN11/SRC	3
MF	GO:0008353	RNA polymerase II CTD heptapeptide repeat kinase activity	2/154	18/17697	0.010505731	0.034611346	0.020753931	CDK7/MAPK1	2
MF	GO:0031435	mitogen-activated protein kinase kinase kinase binding	2/154	18/17697	0.010505731	0.034611346	0.020753931	MAPK1/TGFBR2	2
MF	GO:0004497	monooxygenase activity	4/154	99/17697	0.010960797	0.035804417	0.02146933	CYP19A1/NOS2/NOS3/AKR1C3	4
MF	GO:0005080	protein kinase C binding	3/154	53/17697	0.011016744	0.035804417	0.02146933	ABL1/AKT1/SRC	3
MF	GO:0001085	RNA polymerase II transcription factor binding	5/154	155/17697	0.01151073	0.036466031	0.021866052	AR/ESR1/GSK3B/PPARA/PPARG	5
MF	GO:0005003	ephrin receptor activity	2/154	19/17697	0.011675195	0.036466031	0.021866052	EPHA2/EPHB4	2
MF	GO:0016500	protein-hormone receptor activity	2/154	19/17697	0.011675195	0.036466031	0.021866052	IGF1R/INSR	2
MF	GO:0016505	peptidase activator activity involved in apoptotic process	2/154	19/17697	0.011675195	0.036466031	0.021866052	APAF1/CASP1	2
MF	GO:0016646	oxidoreductase activity, acting on the CH-NH group of donors, NAD or NADP as acceptor	2/154	19/17697	0.011675195	0.036466031	0.021866052	BLVRB/DHFR	2
MF	GO:0070182	DNA polymerase binding	2/154	19/17697	0.011675195	0.036466031	0.021866052	HSP90AA1/HSP90AB1	2
MF	GO:0051087	chaperone binding	4/154	102/17697	0.012129724	0.037565827	0.022525521	ALB/BAG1/HSPA8/PLG	4
MF	GO:0001047	core promoter binding	3/154	55/17697	0.012183511	0.037565827	0.022525521	NR3C1/MMP12/STAT1	3
MF	GO:0061134	peptidase regulator activity	6/154	219/17697	0.012397369	0.037981747	0.022774918	APAF1/XIAP/CASP1/SERPINA1/PRDX5/BIRC7	6
MF	GO:0016705	oxidoreductase activity, acting on paired donors, with incorporation or reduction of molecular oxygen	5/154	159/17697	0.012742336	0.038699246	0.02320515	CYP19A1/HMOX1/NOS2/NOS3/AKR1C3	5
MF	GO:0016684	oxidoreductase activity, acting on peroxide as acceptor	3/154	56/17697	0.012792474	0.038699246	0.02320515	CAT/GSTP1/PRDX5	3
MF	GO:0001091	RNA polymerase II basal transcription factor binding	2/154	20/17697	0.012899016	0.038777666	0.023252173	AR/ESR1	2
MF	GO:0004869	cysteine-type endopeptidase inhibitor activity	3/154	58/17697	0.01406191	0.042011048	0.025191	XIAP/PRDX5/BIRC7	3
MF	GO:0051428	peptide hormone receptor binding	2/154	21/17697	0.014176171	0.042090976	0.025238926	JAK2/PTPN11	2
MF	GO:0016655	oxidoreductase activity, acting on NAD(P)H, quinone or similar compound as acceptor	3/154	60/17697	0.015400428	0.045168329	0.027084193	NQO1/NQO2/AKR1C3	3
MF	GO:0045182	translation regulator activity	3/154	60/17697	0.015400428	0.045168329	0.027084193	DHFR/RARA/TYMS	3
MF	GO:0050431	transforming growth factor beta binding	2/154	22/17697	0.015505652	0.045201325	0.027103978	TGFBR1/TGFBR2	2
MF	GO:0030674	protein binding, bridging	5/154	170/17697	0.016582037	0.048047951	0.028810896	GRB2/HSPA8/PIK3R1/PTPN11/SRC	5
MF	GO:0005525	GTP binding	8/154	374/17697	0.016765681	0.048061475	0.028819004	RHOA/CDC42/DAPK1/HRAS/HSP90AB1/INSR/RAC1/TGM2	8
MF	GO:0017134	fibroblast growth factor binding	2/154	23/17697	0.016886464	0.048061475	0.028819004	FGFR1/FGFR2	2
MF	GO:0044183	protein binding involved in protein folding	2/154	23/17697	0.016886464	0.048061475	0.028819004	HSPA1A/HSPA8	2
MF	GO:0004857	enzyme inhibitor activity	8/154	375/17697	0.017008688	0.048124582	0.028856846	ANXA5/XIAP/CASP3/LGALS3/SERPINA1/TNK2/PRDX5/BIRC7	8
MF	GO:0009055	electron transfer activity	4/154	114/17697	0.017592212	0.049484525	0.029672305	ALDH2/CYP19A1/NQO1/NQO2	4
MF	GO:0032550	purine ribonucleoside binding	8/154	378/17697	0.017752976	0.049646404	0.029769372	RHOA/CDC42/DAPK1/HRAS/HSP90AB1/INSR/RAC1/TGM2	8
