# Supplementary material for: Identification of the Mechanism of Action of the Index Components of Banxia Xiexin Decoction for Gastric Cancer through Network Pharmacology, Bioinformatics, and Molecular Docking Analysis
Source: Hindawi journal article supplement (doi:10.1155/2024/4309908), 2024-01-13
Supplement: f1 [file 4309908.f1.zip › Supplementary file S5 Enriched KEGG pathwanys.txt]

ONTOLOGY	ID	Description	GeneRatio	BgRatio	pvalue	p.adjust	qvalue	geneID	Count
KEGG	hsa05205	Proteoglycans in cancer	33/144	205/8076	5.47648E-23	1.43484E-20	6.80236E-21	AKT1/AKT2/RHOA/BRAF/CASP3/CDC42/MAPK14/CTSL/EGFR/ERBB4/ESR1/FGFR1/GRB2/HGF/HRAS/IGF1/IGF1R/KDR/MDM2/MET/MMP2/MMP9/PIK3R1/PLAU/PRKACA/MAPK1/MAP2K1/PTK2/PTPN11/RAC1/RAF1/SRC/TGFB2	33
KEGG	hsa05215	Prostate cancer	24/144	97/8076	1.7488E-21	2.29093E-19	1.0861E-19	AKT1/AKT2/AR/BRAF/CDK2/EGFR/FGFR1/FGFR2/GRB2/GSK3B/GSTP1/HRAS/HSP90AA1/HSP90AB1/IGF1/IGF1R/MDM2/MMP3/MMP9/PIK3R1/PLAU/MAPK1/MAP2K1/RAF1	24
KEGG	hsa04151	PI3K-Akt signaling pathway	38/144	354/8076	4.91309E-20	4.29077E-18	2.03419E-18	AKT1/AKT2/BCL2L1/CDK2/CDK6/EGFR/EPHA2/EIF4E/ERBB4/FGF1/FGFR1/FGFR2/GRB2/GSK3B/HGF/HRAS/HSP90AA1/HSP90AB1/IGF1/IGF1R/IL2/INSR/JAK2/JAK3/KDR/KIT/MDM2/MET/NOS3/PIK3CG/PIK3R1/MAPK1/MAP2K1/PTK2/RAC1/RAF1/SYK/TEK	38
KEGG	hsa01521	EGFR tyrosine kinase inhibitor resistance	21/144	79/8076	1.32248E-19	8.66224E-18	4.10664E-18	AKT1/AKT2/BCL2L1/BRAF/EGFR/EIF4E/FGFR2/GRB2/GSK3B/HGF/HRAS/IGF1/IGF1R/JAK2/KDR/MET/PIK3R1/MAPK1/MAP2K1/RAF1/SRC	21
KEGG	hsa01522	Endocrine resistance	22/144	98/8076	9.3044E-19	4.8755E-17	2.31141E-17	AKT1/AKT2/BRAF/MAPK14/EGFR/ESR1/ESR2/GRB2/HRAS/IGF1/IGF1R/MDM2/MMP2/MMP9/PIK3R1/PRKACA/MAPK1/MAPK8/MAP2K1/PTK2/RAF1/SRC	22
KEGG	hsa04014	Ras signaling pathway	30/144	232/8076	4.09234E-18	1.78699E-16	8.47186E-17	ABL1/AKT1/AKT2/RHOA/BCL2L1/CDC42/EGFR/EPHA2/FGF1/FGFR1/FGFR2/GRB2/HGF/HRAS/IGF1/IGF1R/INSR/KDR/KIT/MET/PIK3R1/PLA2G2A/PRKACA/MAPK1/MAPK8/MAP2K1/PTPN11/RAC1/RAF1/TEK	30
KEGG	hsa04010	MAPK signaling pathway	33/144	294/8076	5.55677E-18	2.07982E-16	9.86013E-17	AKT1/AKT2/BRAF/CASP3/CDC42/MAPK14/EGFR/EPHA2/ERBB4/FGF1/FGFR1/FGFR2/GRB2/HGF/HRAS/HSPA1A/HSPA8/IGF1/IGF1R/INSR/KDR/KIT/MET/PRKACA/MAPK1/MAPK8/MAP2K1/RAC1/RAF1/TEK/TGFB2/TGFBR1/TGFBR2	33
KEGG	hsa04068	FoxO signaling pathway	23/144	131/8076	4.942E-17	1.6185E-15	7.6731E-16	AKT1/AKT2/BRAF/CAT/CDK2/MAPK14/EGFR/GRB2/HRAS/IGF1/IGF1R/INSR/MDM2/PIK3R1/PLK1/MAPK1/MAPK8/MAP2K1/RAF1/SOD2/TGFB2/TGFBR1/TGFBR2	23
KEGG	hsa04915	Estrogen signaling pathway	23/144	138/8076	1.64935E-16	4.80145E-15	2.2763E-15	AKT1/AKT2/CTSD/EGFR/ESR1/ESR2/GRB2/HRAS/HSPA1A/HSPA8/HSP90AA1/HSP90AB1/MMP2/MMP9/NOS3/PGR/PIK3R1/PRKACA/MAPK1/MAP2K1/RAF1/RARA/SRC	23
KEGG	hsa04015	Rap1 signaling pathway	26/144	210/8076	2.68269E-15	7.02864E-14	3.33218E-14	AKT1/AKT2/RHOA/BRAF/CDC42/MAPK14/EGFR/EPHA2/FGF1/FGFR1/FGFR2/HGF/HRAS/IGF1/IGF1R/INSR/KDR/KIT/MET/PIK3R1/MAPK1/MAP2K1/RAC1/RAF1/SRC/TEK	26
KEGG	hsa05218	Melanoma	17/144	72/8076	4.20475E-15	9.18037E-14	4.35229E-14	AKT1/AKT2/BRAF/CDK6/EGFR/FGF1/FGFR1/HGF/HRAS/IGF1/IGF1R/MDM2/MET/PIK3R1/MAPK1/MAP2K1/RAF1	17
KEGG	hsa05223	Non-small cell lung cancer	17/144	72/8076	4.20475E-15	9.18037E-14	4.35229E-14	AKT1/AKT2/BRAF/CDK6/EGFR/FHIT/GRB2/HGF/HRAS/JAK3/MET/PIK3R1/MAPK1/MAP2K1/RAF1/RARB/RXRB	17
KEGG	hsa05210	Colorectal cancer	18/144	86/8076	6.15901E-15	1.16576E-13	5.52669E-14	AKT1/AKT2/RHOA/BRAF/CASP3/EGFR/GRB2/GSK3B/HRAS/PIK3R1/MAPK1/MAPK8/MAP2K1/RAC1/RAF1/TGFB2/TGFBR1/TGFBR2	18
KEGG	hsa04926	Relaxin signaling pathway	21/144	129/8076	6.22923E-15	1.16576E-13	5.52669E-14	AKT1/AKT2/MAPK14/EGFR/GRB2/HRAS/MMP1/MMP2/MMP9/MMP13/NOS2/NOS3/PIK3R1/PRKACA/MAPK1/MAPK8/MAP2K1/RAF1/SRC/TGFBR1/TGFBR2	21
KEGG	hsa05226	Gastric cancer	22/144	149/8076	1.11014E-14	1.72E-13	8.15427E-14	AKT1/AKT2/BRAF/CDK2/CTNNA1/EGFR/FGF1/FGFR2/GRB2/GSK3B/HGF/HRAS/MET/PIK3R1/MAPK1/MAP2K1/RAF1/RARB/RXRB/TGFB2/TGFBR1/TGFBR2	22
KEGG	hsa05212	Pancreatic cancer	17/144	76/8076	1.11603E-14	1.72E-13	8.15427E-14	AKT1/AKT2/BCL2L1/BRAF/CDC42/CDK6/EGFR/PIK3R1/MAPK1/MAPK8/MAP2K1/RAC1/RAF1/STAT1/TGFB2/TGFBR1/TGFBR2	17
KEGG	hsa05220	Chronic myeloid leukemia	17/144	76/8076	1.11603E-14	1.72E-13	8.15427E-14	ABL1/AKT1/AKT2/BCL2L1/BRAF/CDK6/GRB2/HRAS/MDM2/PIK3R1/MAPK1/MAP2K1/PTPN11/RAF1/TGFB2/TGFBR1/TGFBR2	17
KEGG	hsa05225	Hepatocellular carcinoma	23/144	168/8076	1.40928E-14	2.05129E-13	9.72489E-14	AKT1/AKT2/BCL2L1/BRAF/CDK6/NQO1/EGFR/GRB2/GSK3B/GSTM1/GSTP1/HGF/HMOX1/HRAS/IGF1R/MET/PIK3R1/MAPK1/MAP2K1/RAF1/TGFB2/TGFBR1/TGFBR2	23
KEGG	hsa04917	Prolactin signaling pathway	16/144	70/8076	4.89973E-14	6.75647E-13	3.20315E-13	AKT1/AKT2/MAPK14/ESR1/ESR2/GRB2/GSK3B/HRAS/JAK2/PIK3R1/MAPK1/MAPK8/MAP2K1/RAF1/SRC/STAT1	16
KEGG	hsa05161	Hepatitis B	22/144	162/8076	6.61947E-14	8.67151E-13	4.11104E-13	AKT1/AKT2/APAF1/BRAF/CASP3/CDK2/MAPK14/GRB2/HRAS/JAK2/JAK3/MMP9/PIK3R1/MAPK1/MAPK8/MAP2K1/RAF1/SRC/STAT1/TGFB2/TGFBR1/TGFBR2	22
KEGG	hsa04914	Progesterone-mediated oocyte maturation	18/144	100/8076	1.00323E-13	1.25165E-12	5.93387E-13	AKT1/AKT2/BRAF/CDK2/MAPK14/HSP90AA1/HSP90AB1/IGF1/IGF1R/PGR/PIK3R1/PLK1/PRKACA/MAPK1/MAPK8/MAP2K1/RAF1/AURKA	18
KEGG	hsa05219	Bladder cancer	13/144	41/8076	1.22479E-13	1.45861E-12	6.91506E-13	BRAF/DAPK1/TYMP/EGFR/HRAS/MDM2/MMP1/MMP2/MMP9/MAPK1/MAP2K1/RAF1/SRC	13
KEGG	hsa05418	Fluid shear stress and atherosclerosis	20/144	139/8076	3.28407E-13	3.74099E-12	1.77355E-12	AKT1/AKT2/RHOA/MAPK14/CTSL/NQO1/GSTM1/GSTP1/HMOX1/HSP90AA1/HSP90AB1/KDR/MMP2/MMP9/NOS3/PIK3R1/MAPK8/PTK2/RAC1/SRC	20
KEGG	hsa05211	Renal cell carcinoma	15/144	69/8076	6.97799E-13	7.35978E-12	3.48917E-12	AKT1/AKT2/BRAF/CDC42/GRB2/HGF/HRAS/MET/PIK3R1/MAPK1/MAP2K1/PTPN11/RAC1/RAF1/TGFB2	15
KEGG	hsa04510	Focal adhesion	23/144	201/8076	7.02269E-13	7.35978E-12	3.48917E-12	AKT1/AKT2/XIAP/RHOA/BRAF/CDC42/EGFR/GRB2/GSK3B/HGF/HRAS/IGF1/IGF1R/KDR/MET/PIK3R1/MAPK1/MAPK8/MAP2K1/PTK2/RAC1/RAF1/SRC	23
KEGG	hsa05224	Breast cancer	20/144	147/8076	9.68767E-13	9.76219E-12	4.62812E-12	AKT1/AKT2/BRAF/CDK6/EGFR/ESR1/ESR2/FGF1/FGFR1/GRB2/GSK3B/HRAS/IGF1/IGF1R/KIT/PGR/PIK3R1/MAPK1/MAP2K1/RAF1	20
KEGG	hsa04520	Adherens junction	15/144	71/8076	1.09236E-12	1.06E-11	5.0253E-12	RHOA/CDC42/CSNK2A1/CTNNA1/EGFR/FGFR1/IGF1R/INSR/MET/MAPK1/PTPN1/RAC1/SRC/TGFBR1/TGFBR2	15
KEGG	hsa04370	VEGF signaling pathway	14/144	59/8076	1.16121E-12	1.08656E-11	5.15122E-12	AKT1/AKT2/CDC42/MAPK14/HRAS/KDR/NOS3/PIK3R1/MAPK1/MAP2K1/PTK2/RAC1/RAF1/SRC	14
KEGG	hsa04012	ErbB signaling pathway	16/144	85/8076	1.2391E-12	1.11946E-11	5.3072E-12	ABL1/AKT1/AKT2/BRAF/EGFR/ERBB4/GRB2/GSK3B/HRAS/PIK3R1/MAPK1/MAPK8/MAP2K1/PTK2/RAF1/SRC	16
KEGG	hsa04933	AGE-RAGE signaling pathway in diabetic complications	17/144	100/8076	1.35245E-12	1.18114E-11	5.59963E-12	AKT1/AKT2/CASP3/CDC42/MAPK14/HRAS/JAK2/MMP2/NOS3/PIK3R1/MAPK1/MAPK8/RAC1/STAT1/TGFB2/TGFBR1/TGFBR2	17
KEGG	hsa04062	Chemokine signaling pathway	22/144	192/8076	2.27399E-12	1.92188E-11	9.11139E-12	AKT1/AKT2/RHOA/BRAF/CDC42/GRB2/GSK3B/HRAS/ITK/JAK2/JAK3/PIK3CG/PIK3R1/PRKACA/MAPK1/MAP2K1/PTK2/RAC1/RAF1/CCL5/SRC/STAT1	22
KEGG	hsa04722	Neurotrophin signaling pathway	17/144	119/8076	2.48889E-11	2.03778E-10	9.66084E-11	ABL1/AKT1/AKT2/RHOA/BRAF/CDC42/MAPK14/GRB2/GSK3B/HRAS/PIK3R1/MAPK1/MAPK8/MAP2K1/PTPN11/RAC1/RAF1	17
KEGG	hsa04625	C-type lectin receptor signaling pathway	16/144	104/8076	3.13504E-11	2.48903E-10	1.18002E-10	AKT1/AKT2/RHOA/CASP1/MAPK14/HRAS/IL2/MDM2/PIK3R1/MAPK1/MAPK8/PTPN11/RAF1/SRC/STAT1/SYK	16
KEGG	hsa05214	Glioma	14/144	75/8076	3.8387E-11	2.95806E-10	1.40237E-10	AKT1/AKT2/BRAF/CDK6/EGFR/GRB2/HRAS/IGF1/IGF1R/MDM2/PIK3R1/MAPK1/MAP2K1/RAF1	14
KEGG	hsa05222	Small cell lung cancer	15/144	92/8076	5.68943E-11	4.25894E-10	2.01911E-10	AKT1/AKT2/APAF1/XIAP/BCL2L1/CASP3/CDK2/CDK6/FHIT/NOS2/PIK3R1/PTK2/RARB/RXRB/BIRC7	15
KEGG	hsa05145	Toxoplasmosis	16/144	112/8076	9.95925E-11	7.24812E-10	3.43623E-10	AKT1/AKT2/XIAP/BCL2L1/CASP3/MAPK14/HSPA1A/HSPA8/JAK2/NOS2/PIK3CG/MAPK1/MAPK8/STAT1/TGFB2/BIRC7	16
KEGG	hsa04664	Fc epsilon RI signaling pathway	13/144	68/8076	1.44561E-10	1.02365E-09	4.85296E-10	AKT1/AKT2/BTK/MAPK14/GRB2/HRAS/PIK3R1/MAPK1/MAPK8/MAP2K1/RAC1/RAF1/SYK	13
KEGG	hsa04210	Apoptosis	17/144	136/8076	2.17947E-10	1.50269E-09	7.12402E-10	PARP1/AKT1/AKT2/APAF1/XIAP/BCL2L1/CASP3/CASP7/CTSB/CTSD/CTSL/HRAS/PIK3R1/MAPK1/MAPK8/MAP2K1/RAF1	17
KEGG	hsa04935	Growth hormone synthesis, secretion and action	16/144	119/8076	2.53241E-10	1.70126E-09	8.06544E-10	AKT1/AKT2/MAPK14/GRB2/GSK3B/HRAS/IGF1/JAK2/PIK3R1/PRKACA/MAPK1/MAPK8/MAP2K1/PTK2/RAF1/STAT1	16
KEGG	hsa05213	Endometrial cancer	12/144	58/8076	2.87696E-10	1.88441E-09	8.93371E-10	AKT1/AKT2/BRAF/CTNNA1/EGFR/GRB2/GSK3B/HRAS/PIK3R1/MAPK1/MAP2K1/RAF1	12
KEGG	hsa04660	T cell receptor signaling pathway	15/144	104/8076	3.45303E-10	2.20657E-09	1.0461E-09	AKT1/AKT2/RHOA/CDC42/MAPK14/GRB2/GSK3B/HRAS/IL2/ITK/PIK3R1/MAPK1/MAPK8/MAP2K1/RAF1	15
KEGG	hsa04213	Longevity regulating pathway - multiple species	12/144	62/8076	6.55662E-10	4.09009E-09	1.93905E-09	AKT1/AKT2/CAT/HRAS/HSPA1A/HSPA8/IGF1/IGF1R/INSR/PIK3R1/PRKACA/SOD2	12
KEGG	hsa04066	HIF-1 signaling pathway	15/144	109/8076	6.81188E-10	4.15049E-09	1.96769E-09	AKT1/AKT2/ALDOA/EGFR/EIF4E/HMOX1/IGF1/IGF1R/INSR/NOS2/NOS3/PIK3R1/MAPK1/MAP2K1/TEK	15
KEGG	hsa04380	Osteoclast differentiation	16/144	128/8076	7.66561E-10	4.56452E-09	2.16398E-09	AKT1/AKT2/BTK/MAPK14/GRB2/PIK3R1/PPARG/MAPK1/MAPK8/MAP2K1/RAC1/STAT1/SYK/TGFB2/TGFBR1/TGFBR2	16
KEGG	hsa05160	Hepatitis C	17/144	157/8076	2.10593E-09	1.22612E-08	5.81287E-09	AKT1/AKT2/APAF1/BRAF/CASP3/CDK2/CDK6/EGFR/GRB2/GSK3B/HRAS/PIK3R1/PPARA/MAPK1/MAP2K1/RAF1/STAT1	17
KEGG	hsa05163	Human cytomegalovirus infection	20/144	225/8076	2.43583E-09	1.38737E-08	6.5773E-09	AKT1/AKT2/RHOA/CASP3/CDK6/MAPK14/EGFR/GRB2/GSK3B/HRAS/MDM2/PIK3R1/PRKACA/MAPK1/MAP2K1/PTK2/RAC1/RAF1/CCL5/SRC	20
KEGG	hsa05162	Measles	16/144	139/8076	2.62992E-09	1.46604E-08	6.95029E-09	AKT1/AKT2/APAF1/BCL2L1/CASP3/CDK2/CDK6/CSNK2A1/GSK3B/HSPA1A/HSPA8/IL2/JAK3/PIK3R1/MAPK8/STAT1	16
KEGG	hsa05230	Central carbon metabolism in cancer	12/144	70/8076	2.85853E-09	1.56028E-08	7.39708E-09	AKT1/AKT2/EGFR/FGFR1/FGFR2/HRAS/KIT/MET/PIK3R1/MAPK1/MAP2K1/RAF1	12
KEGG	hsa04550	Signaling pathways regulating pluripotency of stem cells	16/144	143/8076	3.99996E-09	2.13875E-08	1.01395E-08	AKT1/AKT2/MAPK14/FGFR1/FGFR2/GRB2/GSK3B/HRAS/IGF1/IGF1R/JAK2/JAK3/PIK3R1/MAPK1/MAP2K1/RAF1	16
KEGG	hsa05235	PD-L1 expression and PD-1 checkpoint pathway in cancer	13/144	89/8076	4.7056E-09	2.46573E-08	1.16897E-08	AKT1/AKT2/MAPK14/CSNK2A1/EGFR/HRAS/JAK2/PIK3R1/MAPK1/MAP2K1/PTPN11/RAF1/STAT1	13
KEGG	hsa04659	Th17 cell differentiation	14/144	107/8076	5.11761E-09	2.62905E-08	1.2464E-08	MAPK14/HSP90AA1/HSP90AB1/IL2/JAK2/JAK3/MAPK1/MAPK8/RARA/RORA/RXRB/STAT1/TGFBR1/TGFBR2	14
KEGG	hsa04072	Phospholipase D signaling pathway	16/144	148/8076	6.62493E-09	3.33795E-08	1.58247E-08	AKT1/AKT2/RHOA/EGFR/F2/GRB2/HRAS/INSR/KIT/PIK3CG/PIK3R1/MAPK1/MAP2K1/PTPN11/RAF1/SYK	16
KEGG	hsa05167	Kaposi sarcoma-associated herpesvirus infection	18/144	193/8076	7.67192E-09	3.79253E-08	1.79799E-08	AKT1/AKT2/CASP3/CDK6/MAPK14/GSK3B/HRAS/JAK2/PIK3CG/PIK3R1/MAPK1/MAPK8/MAP2K1/RAC1/RAF1/SRC/STAT1/SYK	18
KEGG	hsa04657	IL-17 signaling pathway	13/144	94/8076	9.34161E-09	4.53241E-08	2.14875E-08	CASP3/MAPK14/GSK3B/HSP90AA1/HSP90AB1/LCN2/MMP1/MMP3/MMP9/MMP13/MAPK1/MAPK8/S100A9	13
KEGG	hsa04140	Autophagy - animal	15/144	137/8076	1.70153E-08	7.72467E-08	3.66216E-08	AKT1/AKT2/BCL2L1/CTSB/CTSD/CTSL/DAPK1/HRAS/IGF1R/PIK3R1/PRKACA/MAPK1/MAPK8/MAP2K1/RAF1	15
KEGG	hsa04910	Insulin signaling pathway	15/144	137/8076	1.70153E-08	7.72467E-08	3.66216E-08	AKT1/AKT2/BRAF/EIF4E/GRB2/GSK3B/HRAS/INSR/PIK3R1/PRKACA/MAPK1/MAPK8/MAP2K1/PTPN1/RAF1	15
KEGG	hsa05135	Yersinia infection	15/144	137/8076	1.70153E-08	7.72467E-08	3.66216E-08	AKT1/AKT2/RHOA/CASP1/CDC42/MAPK14/GSK3B/IL2/PIK3R1/MAPK1/MAPK8/MAP2K1/PTK2/RAC1/SRC	15
KEGG	hsa05152	Tuberculosis	17/144	180/8076	1.71004E-08	7.72467E-08	3.66216E-08	AKT1/AKT2/APAF1/RHOA/CASP3/MAPK14/CTSD/JAK2/NOS2/MAPK1/MAPK8/RAF1/SRC/STAT1/SYK/TGFB2/VDR	17
KEGG	hsa04662	B cell receptor signaling pathway	12/144	82/8076	1.85395E-08	8.23281E-08	3.90306E-08	AKT1/AKT2/BTK/GRB2/GSK3B/HRAS/PIK3R1/MAPK1/MAP2K1/RAC1/RAF1/SYK	12
KEGG	hsa05221	Acute myeloid leukemia	11/144	67/8076	2.15861E-08	9.42592E-08	4.4687E-08	AKT1/AKT2/BRAF/GRB2/HRAS/KIT/PIK3R1/MAPK1/MAP2K1/RAF1/RARA	11
KEGG	hsa05142	Chagas disease	13/144	102/8076	2.56769E-08	1.08762E-07	5.15625E-08	AKT1/AKT2/MAPK14/ACE/IL2/NOS2/PIK3R1/MAPK1/MAPK8/CCL5/TGFB2/TGFBR1/TGFBR2	13
KEGG	hsa04919	Thyroid hormone signaling pathway	14/144	121/8076	2.57375E-08	1.08762E-07	5.15625E-08	AKT1/AKT2/ESR1/GSK3B/HRAS/MDM2/PIK3R1/PRKACA/MAPK1/MAP2K1/RAF1/RXRB/SRC/STAT1	14
KEGG	hsa05120	Epithelial cell signaling in Helicobacter pylori infection	11/144	70/8076	3.4724E-08	1.44408E-07	6.84617E-08	CASP3/CDC42/MAPK14/EGFR/MET/MAPK8/PTPN11/RAC1/CCL5/SRC/ADAM17	11
KEGG	hsa04611	Platelet activation	14/144	124/8076	3.53319E-08	1.4464E-07	6.85718E-08	AKT1/AKT2/RHOA/BTK/MAPK14/F2/FGG/NOS3/PIK3CG/PIK3R1/PRKACA/MAPK1/SRC/SYK	14
KEGG	hsa04211	Longevity regulating pathway	12/144	89/8076	4.77436E-08	1.92443E-07	9.12347E-08	AKT1/AKT2/CAT/EIF4E/HRAS/IGF1/IGF1R/INSR/PIK3R1/PPARG/PRKACA/SOD2	12
KEGG	hsa01524	Platinum drug resistance	11/144	73/8076	5.4554E-08	2.16563E-07	1.02669E-07	AKT1/AKT2/APAF1/XIAP/BCL2L1/CASP3/GSTM1/GSTP1/MDM2/PIK3R1/MAPK1	11
KEGG	hsa05166	Human T-cell leukemia virus 1 infection	18/144	219/8076	5.56532E-08	2.17629E-07	1.03175E-07	AKT1/AKT2/XIAP/BCL2L1/CDK2/CHEK1/HRAS/IL2/JAK3/MMP7/PIK3R1/PRKACA/MAPK1/MAPK8/MAP2K1/TGFB2/TGFBR1/TGFBR2	18
KEGG	hsa04912	GnRH signaling pathway	12/144	93/8076	7.88302E-08	3.03728E-07	1.43993E-07	CDC42/MAPK14/EGFR/GRB2/HRAS/MMP2/PRKACA/MAPK1/MAPK8/MAP2K1/RAF1/SRC	12
KEGG	hsa04150	mTOR signaling pathway	15/144	155/8076	9.06794E-08	3.44319E-07	1.63237E-07	AKT1/AKT2/RHOA/BRAF/EIF4E/GRB2/GSK3B/HRAS/IGF1/IGF1R/INSR/PIK3R1/MAPK1/MAP2K1/RAF1	15
KEGG	hsa04218	Cellular senescence	15/144	156/8076	9.88108E-08	3.69835E-07	1.75333E-07	AKT1/AKT2/CDK2/CDK6/CHEK1/MAPK14/HRAS/MDM2/PIK3R1/MAPK1/MAP2K1/RAF1/TGFB2/TGFBR1/TGFBR2	15
KEGG	hsa05203	Viral carcinogenesis	17/144	204/8076	1.09656E-07	4.04644E-07	1.91836E-07	RHOA/CASP3/CDC42/CDK2/CDK6/CHEK1/GRB2/HPN/HRAS/JAK3/MDM2/PIK3R1/PRKACA/MAPK1/RAC1/SRC/SYK	17
KEGG	hsa04360	Axon guidance	16/144	181/8076	1.17701E-07	4.28302E-07	2.03052E-07	ABL1/RHOA/BMP7/CDC42/EPHA2/EPHB4/GSK3B/HRAS/MET/PIK3R1/MAPK1/PTK2/PTPN11/RAC1/RAF1/SRC	16
KEGG	hsa04071	Sphingolipid signaling pathway	13/144	119/8076	1.65458E-07	5.93835E-07	2.81529E-07	AKT1/AKT2/RHOA/MAPK14/CTSD/HRAS/NOS3/PIK3R1/MAPK1/MAPK8/MAP2K1/RAC1/RAF1	13
KEGG	hsa04668	TNF signaling pathway	12/144	112/8076	6.2564E-07	2.2151E-06	1.05015E-06	AKT1/AKT2/CASP3/CASP7/MAPK14/MMP3/MMP9/PIK3R1/MAPK1/MAPK8/MAP2K1/CCL5	12
KEGG	hsa04215	Apoptosis - multiple species	7/144	32/8076	1.14772E-06	4.00936E-06	1.90078E-06	APAF1/XIAP/BCL2L1/CASP3/CASP7/MAPK8/BIRC7	7
KEGG	hsa05231	Choline metabolism in cancer	11/144	98/8076	1.17384E-06	4.04667E-06	1.91847E-06	AKT1/AKT2/EGFR/GRB2/HRAS/PIK3R1/MAPK1/MAPK8/MAP2K1/RAC1/RAF1	11
KEGG	hsa04810	Regulation of actin cytoskeleton	16/144	218/8076	1.48039E-06	5.03717E-06	2.38805E-06	RHOA/BRAF/CDC42/EGFR/F2/FGF1/FGFR1/FGFR2/HRAS/PIK3R1/MAPK1/MAP2K1/PTK2/RAC1/RAF1/SRC	16
KEGG	hsa05131	Shigellosis	17/144	246/8076	1.57468E-06	5.2893E-06	2.50758E-06	AKT1/AKT2/RHOA/BCL2L1/CASP1/CDC42/MAPK14/EGFR/GSK3B/MDM2/PIK3R1/MAPK1/MAPK8/PTK2/RAC1/CCL5/SRC	17
KEGG	hsa05132	Salmonella infection	17/144	249/8076	1.86167E-06	6.17413E-06	2.92707E-06	AKT1/AKT2/RHOA/CASP1/CASP3/CASP7/CDC42/MAPK14/HRAS/HSP90AA1/HSP90AB1/PIK3CG/MAPK1/MAPK8/MAP2K1/RAC1/RAF1	17
KEGG	hsa05164	Influenza A	14/144	171/8076	1.9258E-06	6.30701E-06	2.99006E-06	AKT1/AKT2/APAF1/CASP1/CASP3/CDK6/JAK2/PIK3R1/PLG/MAPK1/MAP2K1/RAF1/CCL5/STAT1	14
KEGG	hsa04928	Parathyroid hormone synthesis, secretion and action	11/144	106/8076	2.57846E-06	8.34019E-06	3.95397E-06	RHOA/BRAF/EGFR/FGFR1/MMP13/PRKACA/MAPK1/MAP2K1/RAF1/RXRB/VDR	11
KEGG	hsa05169	Epstein-Barr virus infection	15/144	202/8076	2.78206E-06	8.88901E-06	4.21416E-06	AKT1/AKT2/APAF1/BTK/CASP3/CDK2/CDK6/MAPK14/JAK3/MDM2/PIK3R1/MAPK8/RAC1/STAT1/SYK	15
KEGG	hsa04931	Insulin resistance	11/144	108/8076	3.10386E-06	9.79772E-06	4.64496E-06	AKT1/AKT2/GSK3B/INSR/NOS3/PIK3R1/PPARA/MAPK8/PTPN1/PTPN11/NR1H2	11
KEGG	hsa04650	Natural killer cell mediated cytotoxicity	12/144	131/8076	3.36382E-06	1.04919E-05	4.97407E-06	BRAF/CASP3/GRB2/HRAS/ICAM2/PIK3R1/MAPK1/MAP2K1/PTPN11/RAC1/RAF1/SYK	12
KEGG	hsa04670	Leukocyte transendothelial migration	11/144	114/8076	5.28399E-06	1.62871E-05	7.72149E-06	RHOA/CDC42/MAPK14/CTNNA1/ITK/MMP2/MMP9/PIK3R1/PTK2/PTPN11/RAC1	11
KEGG	hsa04630	JAK-STAT signaling pathway	13/144	162/8076	5.70116E-06	1.73687E-05	8.23424E-06	AKT1/AKT2/BCL2L1/EGFR/GRB2/HRAS/IL2/JAK2/JAK3/PIK3R1/PTPN11/RAF1/STAT1	13
KEGG	hsa05206	MicroRNAs in cancer	18/144	310/8076	9.0316E-06	2.71986E-05	1.28945E-05	ABL1/RHOA/CASP3/CDK6/EGFR/GRB2/HMOX1/HRAS/MDM2/MET/MMP9/PIK3R1/PLAU/MAPK1/MAP2K1/RAF1/ST14/TGFB2	18
KEGG	hsa04620	Toll-like receptor signaling pathway	10/144	104/8076	1.48394E-05	4.41809E-05	2.09455E-05	AKT1/AKT2/MAPK14/PIK3R1/MAPK1/MAPK8/MAP2K1/RAC1/CCL5/STAT1	10
KEGG	hsa04929	GnRH secretion	8/144	64/8076	1.60195E-05	4.71585E-05	2.23572E-05	AKT1/AKT2/ESR2/HRAS/PIK3R1/MAPK1/MAP2K1/RAF1	8
KEGG	hsa04114	Oocyte meiosis	11/144	129/8076	1.73874E-05	5.06166E-05	2.39966E-05	AR/CDK2/MAPK14/IGF1/IGF1R/PGR/PLK1/PRKACA/MAPK1/MAP2K1/AURKA	11
KEGG	hsa05165	Human papillomavirus infection	18/144	331/8076	2.20551E-05	6.34994E-05	3.01042E-05	AKT1/AKT2/CASP3/CDC42/CDK2/CDK6/EGFR/GRB2/GSK3B/HRAS/MDM2/PIK3R1/PRKACA/MAPK1/MAP2K1/PTK2/RAF1/STAT1	18
KEGG	hsa05170	Human immunodeficiency virus 1 infection	14/144	212/8076	2.32627E-05	6.62483E-05	3.14074E-05	AKT1/AKT2/BCL2L1/CASP3/CHEK1/MAPK14/HRAS/PIK3R1/MAPK1/MAPK8/MAP2K1/PTK2/RAC1/RAF1	14
KEGG	hsa04913	Ovarian steroidogenesis	7/144	51/8076	2.97474E-05	8.38046E-05	3.97306E-05	CYP19A1/HSD17B1/IGF1/IGF1R/INSR/PRKACA/AKR1C3	7
KEGG	hsa04371	Apelin signaling pathway	11/144	137/8076	3.06365E-05	8.5391E-05	4.04827E-05	AKT1/AKT2/HRAS/NOS2/NOS3/PIK3CG/PRKACA/MAPK1/MAP2K1/RAF1/TGFBR1	11
KEGG	hsa05202	Transcriptional misregulation in cancer	13/144	192/8076	3.55421E-05	9.80214E-05	4.64706E-05	BCL2L1/IGF1/IGF1R/MDM2/MET/MMP3/MMP9/PLAU/PPARG/PTK2/RARA/RXRB/TGFBR2	13
KEGG	hsa04115	p53 signaling pathway	8/144	73/8076	4.25033E-05	0.000115274	5.46496E-05	APAF1/BCL2L1/CASP3/CDK2/CDK6/CHEK1/IGF1/MDM2	8
KEGG	hsa05216	Thyroid cancer	6/144	37/8076	4.26777E-05	0.000115274	5.46496E-05	BRAF/HRAS/PPARG/MAPK1/MAP2K1/RXRB	6
KEGG	hsa05130	Pathogenic Escherichia coli infection	13/144	197/8076	4.64989E-05	0.000124313	5.89352E-05	ABL1/RHOA/CASP1/CASP3/CASP7/CDC42/MAPK14/F2/MAPK1/MAPK8/PTPN11/RAC1/SRC	13
KEGG	hsa04666	Fc gamma R-mediated phagocytosis	9/144	97/8076	5.34731E-05	0.000141515	6.70902E-05	AKT1/AKT2/CDC42/PIK3R1/MAPK1/MAP2K1/RAC1/RAF1/SYK	9
KEGG	hsa05133	Pertussis	8/144	76/8076	5.69981E-05	0.000149335	7.07976E-05	RHOA/CASP1/CASP3/CASP7/MAPK14/NOS2/MAPK1/MAPK8	8
KEGG	hsa05100	Bacterial invasion of epithelial cells	8/144	77/8076	6.26599E-05	0.000162543	7.70596E-05	RHOA/CDC42/CTNNA1/MET/PIK3R1/PTK2/RAC1/SRC	8
KEGG	hsa04932	Non-alcoholic fatty liver disease	11/144	150/8076	7.0689E-05	0.000181574	8.60815E-05	AKT1/AKT2/CASP3/CASP7/CDC42/GSK3B/INSR/PIK3R1/PPARA/MAPK8/RAC1	11
KEGG	hsa04730	Long-term depression	7/144	60/8076	8.68098E-05	0.000220817	0.000104686	BRAF/HRAS/IGF1/IGF1R/MAPK1/MAP2K1/RAF1	7
KEGG	hsa04621	NOD-like receptor signaling pathway	12/144	181/8076	8.79982E-05	0.000221688	0.000105099	XIAP/RHOA/BCL2L1/CASP1/MAPK14/CTSB/HSP90AA1/HSP90AB1/MAPK1/MAPK8/CCL5/STAT1	12
KEGG	hsa05010	Alzheimer disease	18/144	369/8076	9.18427E-05	0.000229169	0.000108646	AKT1/AKT2/APAF1/BRAF/CASP3/CASP7/CSNK2A1/GSK3B/HRAS/INSR/MME/NOS2/PIK3R1/MAPK1/MAPK8/MAP2K1/RAF1/ADAM17	18
KEGG	hsa04540	Gap junction	8/144	88/8076	0.000162321	0.000401208	0.000190207	EGFR/GRB2/HRAS/PRKACA/MAPK1/MAP2K1/RAF1/SRC	8
KEGG	hsa04725	Cholinergic synapse	9/144	113/8076	0.000175483	0.000429687	0.000203708	AKT1/AKT2/HRAS/JAK2/PIK3CG/PIK3R1/PRKACA/MAPK1/MAP2K1	9
KEGG	hsa04920	Adipocytokine signaling pathway	7/144	69/8076	0.000212194	0.000514768	0.000244044	AKT1/AKT2/JAK2/PPARA/MAPK8/PTPN11/RXRB	7
KEGG	hsa04110	Cell cycle	9/144	124/8076	0.000353393	0.00084944	0.000402708	ABL1/CDK2/CDK6/CDK7/CHEK1/GSK3B/MDM2/PLK1/TGFB2	9
KEGG	hsa04921	Oxytocin signaling pathway	10/144	154/8076	0.000408878	0.000973873	0.0004617	RHOA/EGFR/HRAS/NOS3/PIK3CG/PRKACA/MAPK1/MAP2K1/RAF1/SRC	10
KEGG	hsa04024	cAMP signaling pathway	12/144	216/8076	0.000458173	0.001081453	0.000512701	AKT1/AKT2/RHOA/BRAF/PIK3R1/PPARA/PRKACA/MAPK1/MAPK8/MAP2K1/RAC1/RAF1	12
KEGG	hsa05134	Legionellosis	6/144	57/8076	0.000497159	0.001162997	0.00055136	APAF1/CASP1/CASP3/CASP7/HSPA1A/HSPA8	6
KEGG	hsa04217	Necroptosis	10/144	159/8076	0.000526838	0.001221517	0.000579104	PARP1/XIAP/CASP1/HSP90AA1/HSP90AB1/JAK2/JAK3/PPIA/MAPK8/STAT1	10
KEGG	hsa05020	Prion disease	13/144	273/8076	0.001137329	0.002613862	0.001239195	APAF1/CASP3/MAPK14/CSNK2A1/GSK3B/HSPA1A/HSPA8/PIK3R1/PRKACA/MAPK1/MAPK8/RAC1/CCL5	13
KEGG	hsa04720	Long-term potentiation	6/144	67/8076	0.001181792	0.002692431	0.001276444	BRAF/HRAS/PRKACA/MAPK1/MAP2K1/RAF1	6
KEGG	hsa04658	Th1 and Th2 cell differentiation	7/144	92/8076	0.001226077	0.002769242	0.001312859	MAPK14/IL2/JAK2/JAK3/MAPK1/MAPK8/STAT1	7
KEGG	hsa04350	TGF-beta signaling pathway	7/144	94/8076	0.001390891	0.003114645	0.001476609	RHOA/BMP2/BMP7/MAPK1/TGFB2/TGFBR1/TGFBR2	7
KEGG	hsa04144	Endocytosis	12/144	252/8076	0.001762879	0.003914188	0.001855662	RHOA/CDC42/EGFR/FGFR2/HRAS/HSPA1A/HSPA8/IGF1R/MDM2/SRC/TGFBR1/TGFBR2	12
KEGG	hsa04916	Melanogenesis	7/144	101/8076	0.002107984	0.004641108	0.002200284	GSK3B/HRAS/KIT/PRKACA/MAPK1/MAP2K1/RAF1	7
KEGG	hsa05140	Leishmaniasis	6/144	77/8076	0.002427855	0.005300817	0.002513043	MAPK14/JAK2/NOS2/MAPK1/STAT1/TGFB2	6
KEGG	hsa04064	NF-kappa B signaling pathway	7/144	104/8076	0.002491056	0.005393856	0.002557152	PARP1/XIAP/BCL2L1/BTK/CSNK2A1/PLAU/SYK	7
KEGG	hsa04612	Antigen processing and presentation	6/144	78/8076	0.002592281	0.005567029	0.00263925	CTSB/CTSL/HSPA1A/HSPA8/HSP90AA1/HSP90AB1	6
KEGG	hsa04022	cGMP-PKG signaling pathway	9/144	167/8076	0.002919083	0.006217884	0.002947812	AKT1/AKT2/RHOA/INSR/NOS3/PIK3CG/MAPK1/MAP2K1/RAF1	9
KEGG	hsa04923	Regulation of lipolysis in adipocytes	5/144	57/8076	0.003343108	0.007063664	0.003348784	AKT1/AKT2/INSR/PIK3R1/PRKACA	5
KEGG	hsa04960	Aldosterone-regulated sodium reabsorption	4/144	37/8076	0.004054764	0.008498785	0.004029155	IGF1/INSR/PIK3R1/MAPK1	4
KEGG	hsa04726	Serotonergic synapse	7/144	115/8076	0.004370422	0.009087703	0.004308353	BRAF/CASP3/HRAS/PRKACA/MAPK1/MAP2K1/RAF1	7
KEGG	hsa04152	AMPK signaling pathway	7/144	120/8076	0.005513988	0.011375314	0.005392877	AKT1/AKT2/IGF1/IGF1R/INSR/PIK3R1/PPARG	7
KEGG	hsa05323	Rheumatoid arthritis	6/144	93/8076	0.0061912	0.012672613	0.006007908	CTSL/MMP1/MMP3/CCL5/TEK/TGFB2	6
KEGG	hsa04934	Cushing syndrome	8/144	155/8076	0.00639972	0.012997881	0.006162113	BRAF/CDK2/CDK6/EGFR/GSK3B/PRKACA/MAPK1/MAP2K1	8
KEGG	hsa04390	Hippo signaling pathway	8/144	157/8076	0.006900333	0.013906824	0.00659303	BMP2/BMP7/CTNNA1/FGF1/GSK3B/TGFB2/TGFBR1/TGFBR2	8
KEGG	hsa04137	Mitophagy - animal	5/144	68/8076	0.007122188	0.014244376	0.006753059	BCL2L1/CSNK2A1/HRAS/MAPK8/SRC	5
KEGG	hsa04750	Inflammatory mediator regulation of TRP channels	6/144	100/8076	0.008752	0.017371393	0.008235534	MAPK14/IGF1/PIK3R1/PRKACA/MAPK8/SRC	6
KEGG	hsa04930	Type II diabetes mellitus	4/144	46/8076	0.008856336	0.017446316	0.008271054	INSR/PIK3R1/MAPK1/MAPK8	4
KEGG	hsa05146	Amoebiasis	6/144	102/8076	0.00960546	0.018780824	0.008903725	CASP3/NOS2/PIK3R1/PRKACA/PTK2/TGFB2	6
KEGG	hsa05022	Pathways of neurodegeneration - multiple diseases	16/144	475/8076	0.010277815	0.019844878	0.009408178	APAF1/BCL2L1/BRAF/CASP3/CASP7/CAT/MAPK14/CSNK2A1/GSK3B/HRAS/NOS2/MAPK1/MAPK8/MAP2K1/RAC1/RAF1	16
KEGG	hsa04270	Vascular smooth muscle contraction	7/144	135/8076	0.010301158	0.019844878	0.009408178	RHOA/BRAF/PLA2G2A/PRKACA/MAPK1/MAP2K1/RAF1	7
KEGG	hsa00983	Drug metabolism - other enzymes	5/144	79/8076	0.013186437	0.025217858	0.011955433	TYMP/GSTM1/GSTP1/IMPDH1/UMPS	5
KEGG	hsa04610	Complement and coagulation cascades	5/144	85/8076	0.017640616	0.033491604	0.0158779	F2/FGG/SERPINA1/PLAU/PLG	5
KEGG	hsa04310	Wnt signaling pathway	7/144	160/8076	0.024104258	0.045433925	0.021539587	RHOA/CSNK2A1/GSK3B/MMP7/PRKACA/MAPK8/RAC1	7
