# Supplementary material for: Identification of the Mechanism of Action of the Index Components of Banxia Xiexin Decoction for Gastric Cancer through Network Pharmacology, Bioinformatics, and Molecular Docking Analysis
Source: Hindawi journal article supplement (doi:10.1155/2024/4309908), 2024-01-13
Supplement: f1 [file 4309908.f1.zip › Supplementary file S6 molecular docking settings.docx]

# Supplementary file

This file provides the molecular docking settings and results using Auto Dock Vina.

## 1a2c

### config

center_x = 0.0

center_y = 0.0

center_z = 0.0

size_x = 56.0

size_y = 54.0

size_z = 60.0

1a2c_baicalin_docking

Using random seed: 615289024

Performing search ...

0% 10 20 30 40 50 60 70 80 90 100%

|----|----|----|----|----|----|----|----|----|----|

***************************************************

done.

Refining results ... done.

mode | affinity | dist from best mode

| (kcal/mol) | rmsd l.b.| rmsd u.b.

-----+------------+----------+----------

1 -8.5 0.000 0.000

2 -8.4 12.437 15.178

3 -8.4 2.488 4.028

4 -8.2 13.163 15.752

5 -8.2 3.778 4.851

6 -8.1 13.069 16.180

7 -8.1 40.596 42.790

8 -8.1 13.918 16.368

9 -8.0 29.433 31.329

Writing output ... done.

### 1a2c_Berberine_docking

Using random seed: -2067014220

Performing search ...

0% 10 20 30 40 50 60 70 80 90 100%

|----|----|----|----|----|----|----|----|----|----|

***************************************************

done.

Refining results ... done.

mode | affinity | dist from best mode

| (kcal/mol) | rmsd l.b.| rmsd u.b.

-----+------------+----------+----------

1 -7.6 0.000 0.000

2 -7.6 33.845 35.283

3 -7.6 28.737 29.644

4 -7.5 25.449 26.308

5 -7.4 20.418 21.455

6 -7.3 10.138 12.213

7 -7.3 30.316 31.104

8 -7.3 27.352 28.403

9 -7.3 19.925 20.774

Writing output ... done.

### 1a2c_coptisine

Using random seed: -1057818404

Performing search ...

0% 10 20 30 40 50 60 70 80 90 100%

|----|----|----|----|----|----|----|----|----|----|

***************************************************

done.

Refining results ... done.

mode | affinity | dist from best mode

| (kcal/mol) | rmsd l.b.| rmsd u.b.

-----+------------+----------+----------

1 -9.3 0.000 0.000

2 -8.6 25.072 25.633

3 -8.3 28.965 29.568

4 -7.9 10.743 12.649

5 -7.8 27.333 28.011

6 -7.8 33.051 36.279

7 -7.8 21.487 25.024

8 -7.6 21.618 24.536

9 -7.6 33.305 35.122

Writing output ... done.

### 1a2c_epiberberine_

Using random seed: 579035612

Performing search ...

0% 10 20 30 40 50 60 70 80 90 100%

|----|----|----|----|----|----|----|----|----|----|

***************************************************

done.

Refining results ... done.

mode | affinity | dist from best mode

| (kcal/mol) | rmsd l.b.| rmsd u.b.

-----+------------+----------+----------

1 -8.2 0.000 0.000

2 -7.3 34.284 35.213

3 -7.2 22.682 25.007

4 -7.2 25.137 26.061

5 -7.2 33.735 35.239

6 -7.2 26.064 26.864

7 -7.2 37.139 37.696

8 -7.2 24.572 27.107

9 -7.1 24.834 25.587

Writing output ... done.

### 1a2c_gingerol_

Using random seed: -746058848

Performing search ...

0% 10 20 30 40 50 60 70 80 90 100%

|----|----|----|----|----|----|----|----|----|----|

***************************************************

done.

Refining results ... done.

mode | affinity | dist from best mode

| (kcal/mol) | rmsd l.b.| rmsd u.b.

-----+------------+----------+----------

1 -7.3 0.000 0.000

2 -7.1 1.517 2.134

3 -6.4 1.814 6.899

4 -6.1 17.326 18.509

5 -6.0 1.968 7.018

6 -5.9 17.343 18.255

7 -5.8 10.041 10.952

8 -5.7 9.308 10.018

9 -5.7 10.992 11.674

Writing output ... done.

### 1a2c_palmatine_

Using random seed: -2049834912

Performing search ...

0% 10 20 30 40 50 60 70 80 90 100%

|----|----|----|----|----|----|----|----|----|----|

***************************************************

done.

Refining results ... done.

mode | affinity | dist from best mode

| (kcal/mol) | rmsd l.b.| rmsd u.b.

-----+------------+----------+----------

1 -9.0 0.000 0.000

2 -7.7 17.944 18.284

3 -7.2 17.821 18.830

4 -7.0 8.497 10.068

5 -6.9 26.224 28.097

6 -6.8 8.294 10.004

7 -6.8 12.520 14.969

8 -6.7 9.748 12.248

9 -6.7 9.057 10.692

Writing output ... done.

## 3S79 DOCKING

### config.txt

receptor = 3S79_prep.pdbqt

ligand = baicalin(modified).pdbqt

center_x = 83.409

center_y = 54.97

center_z = 46.453

size_x = 68.0

size_y = 82.0

size_z = 60.0

out = dockingresult.pdbqt

results

### 3S79 and baicalin

Using random seed: 356391304

Performing search ...

0% 10 20 30 40 50 60 70 80 90 100%

|----|----|----|----|----|----|----|----|----|----|

***************************************************

done.

Refining results ... done.

mode | affinity | dist from best mode

| (kcal/mol) | rmsd l.b.| rmsd u.b.

-----+------------+----------+----------

1 -10.1 0.000 0.000

2 -10.0 0.910 2.083

3 -9.9 6.907 9.625

4 -9.7 14.385 15.901

5 -9.7 14.541 16.156

6 -9.5 14.250 16.892

7 -9.5 2.370 5.622

8 -9.5 1.970 5.523

9 -9.3 2.321 3.861

Writing output ... done.

### 3S79 and Berberine

Using random seed: 747223196

Performing search ...

0% 10 20 30 40 50 60 70 80 90 100%

|----|----|----|----|----|----|----|----|----|----|

***************************************************

done.

Refining results ... done.

mode | affinity | dist from best mode

| (kcal/mol) | rmsd l.b.| rmsd u.b.

-----+------------+----------+----------

1 -11.2 0.000 0.000

2 -9.4 10.334 13.819

3 -9.4 9.997 13.770

4 -9.0 25.004 27.101

5 -8.7 26.611 29.452

6 -8.7 24.069 27.253

7 -8.4 2.755 3.663

8 -8.4 26.717 29.699

Writing output ... done.

### 3S79 and coptisine

Using random seed: -1582172968

Performing search ...

0% 10 20 30 40 50 60 70 80 90 100%

|----|----|----|----|----|----|----|----|----|----|

***************************************************

done.

Refining results ... done.

mode | affinity | dist from best mode

| (kcal/mol) | rmsd l.b.| rmsd u.b.

-----+------------+----------+----------

1 -11.1 0.000 0.000

2 -11.0 7.831 10.950

3 -10.9 17.356 17.879

4 -10.5 1.357 5.895

5 -10.5 4.327 5.654

6 -10.4 17.124 18.712

7 -10.4 7.270 9.006

8 -10.3 5.955 7.369

9 -10.2 6.503 7.480

Writing output ... done.

### 3S79_epiberberine

Using random seed: -10172184

Performing search ...

0% 10 20 30 40 50 60 70 80 90 100%

|----|----|----|----|----|----|----|----|----|----|

***************************************************

done.

Refining results ... done.

mode | affinity | dist from best mode

| (kcal/mol) | rmsd l.b.| rmsd u.b.

-----+------------+----------+----------

1 -9.9 0.000 0.000

2 -9.6 1.543 2.344

3 -9.4 7.887 9.306

4 -9.2 18.205 19.176

5 -9.0 19.314 20.188

6 -9.0 21.079 24.684

7 -8.9 2.362 3.733

8 -8.8 20.935 21.811

9 -8.8 17.216 18.482

Writing output ... done.

### 3S79_gingerol

Using random seed: -1195492968

Performing search ...

0% 10 20 30 40 50 60 70 80 90 100%

|----|----|----|----|----|----|----|----|----|----|

***************************************************

done.

Refining results ... done.

mode | affinity | dist from best mode

| (kcal/mol) | rmsd l.b.| rmsd u.b.

-----+------------+----------+----------

1 -7.3 0.000 0.000

2 -7.0 1.291 2.047

3 -7.0 24.168 26.822

4 -6.8 16.363 18.181

5 -6.8 23.934 26.565

6 -6.8 13.390 15.747

7 -6.7 1.921 7.316

8 -6.5 24.400 27.287

9 -6.4 4.494 6.374

Writing output ... done.

### 3S79 palmatine

Using random seed: 1845677100

Performing search ...

0% 10 20 30 40 50 60 70 80 90 100%

|----|----|----|----|----|----|----|----|----|----|

***************************************************

done.

Refining results ... done.

mode | affinity | dist from best mode

| (kcal/mol) | rmsd l.b.| rmsd u.b.

-----+------------+----------+----------

1 -9.0 0.000 0.000

2 -9.0 3.739 6.148

3 -8.9 3.806 6.206

4 -8.7 5.371 6.690

5 -8.7 0.988 6.047

6 -8.7 4.148 7.195

7 -8.6 15.278 16.560

8 -8.5 12.372 13.305

9 -8.5 6.379 7.451

Writing output ... done.

## 4Q9G

### config

center_x = 20.998

center_y = 31.366

center_z = 56.343

size_x = 68.0

size_y = 56.0

size_z = 66.0

results

### 4Q9G_baicalin

Using random seed: -1693576408

Performing search ...

0% 10 20 30 40 50 60 70 80 90 100%

|----|----|----|----|----|----|----|----|----|----|

***************************************************

done.

Refining results ... done.

mode | affinity | dist from best mode

| (kcal/mol) | rmsd l.b.| rmsd u.b.

-----+------------+----------+----------

1 -10.3 0.000 0.000

2 -10.1 2.060 3.393

3 -9.7 15.158 17.674

4 -9.7 1.892 2.580

5 -9.6 15.112 17.547

6 -9.6 1.794 2.106

7 -9.5 18.562 21.439

8 -9.4 26.109 27.849

9 -9.4 2.468 4.295

Writing output ... done.

### 4Q9G_Berberine

Using random seed: -425946832

Performing search ...

0% 10 20 30 40 50 60 70 80 90 100%

|----|----|----|----|----|----|----|----|----|----|

***************************************************

done.

Refining results ... done.

mode | affinity | dist from best mode

| (kcal/mol) | rmsd l.b.| rmsd u.b.

-----+------------+----------+----------

1 -9.1 0.000 0.000

2 -8.9 1.248 5.911

3 -8.8 15.654 16.752

4 -8.7 1.010 5.961

5 -8.6 14.231 15.406

6 -8.4 1.129 2.300

7 -8.4 1.061 5.593

8 -8.4 14.830 16.882

9 -8.2 14.748 16.024

Writing output ... done.

### 4Q9G_coptisine

Using random seed: -1315802712

Performing search ...

0% 10 20 30 40 50 60 70 80 90 100%

|----|----|----|----|----|----|----|----|----|----|

***************************************************

done.

Refining results ... done.

mode | affinity | dist from best mode

| (kcal/mol) | rmsd l.b.| rmsd u.b.

-----+------------+----------+----------

1 -10.1 0.000 0.000

2 -9.5 2.082 3.775

3 -9.3 24.154 25.281

4 -9.3 2.649 6.875

5 -9.2 18.258 21.252

6 -9.1 14.455 16.280

7 -8.9 3.261 5.148

8 -8.8 15.145 17.240

9 -8.7 24.144 25.187

Writing output ... done.

### 4Q9G_epiberberine

Using random seed: -371186628

Performing search ...

0% 10 20 30 40 50 60 70 80 90 100%

|----|----|----|----|----|----|----|----|----|----|

***************************************************

done.

Refining results ... done.

mode | affinity | dist from best mode

| (kcal/mol) | rmsd l.b.| rmsd u.b.

-----+------------+----------+----------

1 -9.0 0.000 0.000

2 -8.9 1.117 5.589

3 -8.6 1.621 3.389

4 -8.4 1.500 2.843

5 -8.1 3.058 4.730

6 -8.1 2.935 4.974

7 -7.9 27.248 30.121

8 -7.8 2.127 5.742

9 -7.7 2.783 5.159

Writing output ... done.

### 4Q9G_gingerol

Using random seed: -433903072

Performing search ...

0% 10 20 30 40 50 60 70 80 90 100%

|----|----|----|----|----|----|----|----|----|----|

***************************************************

done.

Refining results ... done.

mode | affinity | dist from best mode

| (kcal/mol) | rmsd l.b.| rmsd u.b.

-----+------------+----------+----------

1 -6.3 0.000 0.000

2 -6.2 1.697 7.042

3 -6.2 13.744 14.233

4 -6.1 13.910 15.729

5 -6.0 13.939 15.658

6 -6.0 13.990 14.685

7 -5.9 14.921 16.040

8 -5.9 18.535 20.222

9 -5.8 26.295 27.610

Writing output ... done.

### 4Q9G_palmatine

Using random seed: 1383285680

Performing search ...

0% 10 20 30 40 50 60 70 80 90 100%

|----|----|----|----|----|----|----|----|----|----|

***************************************************

done.

Refining results ... done.

mode | affinity | dist from best mode

| (kcal/mol) | rmsd l.b.| rmsd u.b.

-----+------------+----------+----------

1 -8.4 0.000 0.000

2 -8.3 1.127 5.751

3 -8.1 1.521 6.455

4 -8.1 14.500 16.074

5 -7.7 15.240 15.940

6 -7.6 1.318 1.976

7 -7.4 2.309 3.938

8 -7.3 25.107 26.807

9 -7.2 14.158 14.933

Writing output ... done.

## 6K25

### config

center_x = -19.238

center_y = -34.043

center_z = -15.544

size_x = 56.0

size_y = 76.0

size_z = 52.0

result

### 6K25_baicalin

Using random seed: -1719315944

Performing search ...

0% 10 20 30 40 50 60 70 80 90 100%

|----|----|----|----|----|----|----|----|----|----|

***************************************************

done.

Refining results ... done.

mode | affinity | dist from best mode

| (kcal/mol) | rmsd l.b.| rmsd u.b.

-----+------------+----------+----------

1 -10.0 0.000 0.000

2 -9.7 2.445 4.106

3 -9.5 16.876 18.220

4 -9.3 2.991 4.380

5 -9.3 3.576 5.797

6 -9.0 2.586 5.922

7 -8.9 3.013 4.991

8 -8.8 3.927 5.947

9 -8.7 3.116 4.371

Writing output ... done.

### 6K25_Berberine

Using random seed: 667054512

Performing search ...

0% 10 20 30 40 50 60 70 80 90 100%

|----|----|----|----|----|----|----|----|----|----|

***************************************************

done.

Refining results ... done.

mode | affinity | dist from best mode

| (kcal/mol) | rmsd l.b.| rmsd u.b.

-----+------------+----------+----------

1 -10.1 0.000 0.000

2 -10.0 1.422 2.555

3 -9.6 1.136 5.906

4 -9.5 1.032 5.647

5 -8.9 1.546 5.778

6 -8.6 2.333 3.179

7 -8.2 18.157 19.069

8 -8.2 19.266 20.150

9 -8.1 5.174 6.329

Writing output ... done.

### 6K25_coptisine

Using random seed: 480658300

Performing search ...

0% 10 20 30 40 50 60 70 80 90 100%

|----|----|----|----|----|----|----|----|----|----|

***************************************************

done.

Refining results ... done.

mode | affinity | dist from best mode

| (kcal/mol) | rmsd l.b.| rmsd u.b.

-----+------------+----------+----------

1 -11.0 0.000 0.000

2 -11.0 0.824 5.874

3 -10.5 0.937 5.475

4 -10.4 1.385 2.484

5 -10.4 15.337 16.899

6 -10.3 15.744 17.620

7 -10.0 5.876 6.943

8 -9.9 1.260 2.544

9 -9.3 19.542 20.817

Writing output ... done.

### 6K25_epiberberine

Using random seed: 1626816968

Performing search ...

0% 10 20 30 40 50 60 70 80 90 100%

|----|----|----|----|----|----|----|----|----|----|

***************************************************

done.

Refining results ... done.

mode | affinity | dist from best mode

| (kcal/mol) | rmsd l.b.| rmsd u.b.

-----+------------+----------+----------

1 -10.3 0.000 0.000

2 -10.1 1.253 6.015

3 -10.0 1.268 2.521

4 -9.4 15.723 17.426

5 -9.1 15.726 18.231

6 -9.0 16.170 18.526

7 -8.5 4.700 5.975

8 -8.4 19.705 20.829

9 -8.4 1.973 5.863

Writing output ... done.

### 6K25_gingerol

Using random seed: -717952528

Performing search ...

0% 10 20 30 40 50 60 70 80 90 100%

|----|----|----|----|----|----|----|----|----|----|

***************************************************

done.

Refining results ... done.

mode | affinity | dist from best mode

| (kcal/mol) | rmsd l.b.| rmsd u.b.

-----+------------+----------+----------

1 -7.3 0.000 0.000

2 -7.2 2.283 6.597

3 -7.0 14.862 16.859

4 -6.9 14.267 15.614

5 -6.8 1.789 1.986

6 -6.8 19.035 20.294

7 -6.8 2.354 6.797

8 -6.7 14.199 16.860

9 -6.6 14.487 16.493

Writing output ... done.

### 6K25_palmatine

Using random seed: 1363351808

Performing search ...

0% 10 20 30 40 50 60 70 80 90 100%

|----|----|----|----|----|----|----|----|----|----|

***************************************************

done.

Refining results ... done.

mode | affinity | dist from best mode

| (kcal/mol) | rmsd l.b.| rmsd u.b.

-----+------------+----------+----------

1 -9.2 0.000 0.000

2 -8.9 15.051 16.887

3 -8.8 15.274 17.837

4 -8.7 14.945 18.205

5 -8.7 15.464 17.436

6 -8.4 1.561 6.597

7 -8.3 15.492 18.220

8 -8.2 15.308 17.482

9 -8.0 16.250 18.967

Writing output ... done.
